# Supplementary material for: Systematic Analysis of tRNA-Derived Small RNAs Reveals Effects of Xuefu-Zhuyu Decoction on Hippocampus of Rats after Traumatic Brain Injury
Source: Research Square preprint supplement (doi:10.21203/rs.3.rs-826529/v1), 2021-09-02
Supplement: Supplementary file 1 [file a3a3eebb9bdc1679e9b4f3b9.xlsx]

## Sheet: AS-tDR-001612
Predicted target genes for AS-tDR-001612
# Column A: Seqname, the name the sequence.
# Column B: GeneSymbol, the official gene symbol of the sequence.
# Column C: Type, the type of the transcipt.
# Column D: Diagrams, the diagrams illustrate key features for miRNA binding. See Ref [1,2] for details.
# Column E: Total, the total number of the binding sites on the targets.
# Column F: Context+, the sum of the context+ scores used in TargetScan after version 6.0. More negative is better. See Ref [3] for details.
# Column G: Structure, the sum of the structure scores used in miRanda (Ref [4]). The higher the better.
# Column H: Energy, the sum of the free energy predicted by miRanda (Ref [4]). More negative is better.
# Column I ~ Column L: Counting numbers for different seed match types
# Reference:
[1] Grimson A., et al. MicroRNA Targeting Specificity in Mammals: Determinants beyond Seed Pairing. Molecular Cell, Volume 27, Issue 1, 91-105, 6 July 2007.
[2] Amy E. Pasquinelli. MicroRNAs and their targets: recognition, regulation and an emerging reciprocal relationship. Nature Reviews Genetics, Volume 13, 271-282, 1 April 2012.
[3] David M Garcia., et al. Weak Seed-Pairing Stability and High Target-Site Abundance Decrease the Proficiency of lsy-6 and Other miRNAs. Nat. Struct. Mol. Biol., Volume 18, 1139-1146, 2011.
[4] Enright AJ., el al. miRanda algorithm: MicroRNA targets in Drosophila. Genome Biology, Volume 5, R1, 2003.
Target genes for AS-tDR-001612
Target			Sites		TargetScan	miranda		Seed match types				Annotations
Seqname	GeneSymbol	Type	Diagrams	Total	Context+	Structure	Energy	8mer-1a	7mer-m8	7mer-1a	Imperfect	UTR Length
ENSRNOT00000066101	Sema6d	Coding	Click Me	1	-0.339	141	-15.8	1	0	0	0	2408
NM_001170685	Ptprz1	Coding	Click Me	1	-0.324	148	-18.85	1	0	0	0	1888
ENSRNOT00000033148	Xpnpep1	Coding	Click Me	1	-0.302	141	-11.95	1	0	0	0	402
ENSRNOT00000025912	Nxt2	Coding	Click Me	1	-0.34	141	-15.13	1	0	0	0	1849
ENSRNOT00000006272	Cdcp1	Coding	Click Me	1	-0.401	141	-12.6	1	0	0	0	2606
ENSRNOT00000003472	Parm1	Coding	Click Me	1	-0.37	151	-16.45	1	0	0	0	3785
NM_001024884	RGD1309362	Coding	Click Me	1	-0.352	142	-15.88	1	0	0	0	1438
NM_001318948	Oprl1	Coding	Click Me	1	-0.313	140	-11.65	1	0	0	0	1663
NM_001108552	Trim2	Coding	Click Me	1	-0.301	143	-11.64	1	0	0	0	4078
ENSRNOT00000050374	Mras	Coding	Click Me	1	-0.31	140	-17.03	1	0	0	0	2936
NM_001108120	Nxt2	Coding	Click Me	1	-0.339	141	-15.13	1	0	0	0	1857
ENSRNOT00000079221	Zfp68	Coding	Click Me	1	-0.314	143	-13.13	1	0	0	0	2593
ENSRNOT00000024662	Zfp819	Coding	Click Me	1	-0.335	154	-17.05	1	0	0	0	277
ENSRNOT00000091644	Cd69	Coding	Click Me	1	-0.354	146	-18.45	1	0	0	0	943
ENSRNOT00000077963	Mras	Coding	Click Me	1	-0.336	140	-17.03	1	0	0	0	476
ENSRNOT00000080498	Ndc80	Coding	Click Me	1	-0.309	142	-15.67	0	1	0	0	1410
ENSRNOT00000001784	Zfp68	Coding	Click Me	1	-0.314	143	-13.13	1	0	0	0	2593
ENSRNOT00000045845	Oprl1	Coding	Click Me	1	-0.313	140	-11.65	1	0	0	0	1660
ENSRNOT00000031458	Trpt1	Coding	Click Me	1	-0.302	154	-20.23	1	0	0	0	1801
ENSRNOT00000018644	Ndc80	Coding	Click Me	1	-0.309	142	-15.67	0	1	0	0	100
ENSRNOT00000012377	Nbn	Coding	Click Me	1	-0.32	153	-15.84	1	0	0	0	322
ENSRNOT00000004315	Upk1b	Coding	Click Me	1	-0.33	141	-11.64	1	0	0	0	927
NM_013061	Si	Coding	Click Me	1	-0.317	145	-15.3	1	0	0	0	448
ENSRNOT00000068416	Tubgcp3	Coding	Click Me	1	-0.342	153	-16.45	1	0	0	0	1616
ENSRNOT00000022538	Rab38	Coding	Click Me	1	-0.302	147	-14.82	1	0	0	0	710
ENSRNOT00000085382	Trim2	Coding	Click Me	1	-0.302	143	-11.64	1	0	0	0	4082
ENSRNOT00000078158	RGD1305938	Coding	Click Me	1	-0.378	142	-11.65	1	0	0	0	3722
ENSRNOT00000088016	Xpnpep1	Coding	Click Me	1	-0.302	141	-11.95	1	0	0	0	407
NM_001014017	Zfp819	Coding	Click Me	1	-0.335	154	-17.05	1	0	0	0	281
ENSRNOT00000008355	Sf3a1	Coding	Click Me	1	-0.34	156	-20.22	1	0	0	0	2508
ENSRNOT00000043736	RGD1309362	Coding	Click Me	1	-0.353	142	-15.88	1	0	0	0	1427
ENSRNOT00000089329	Tubgcp3	Coding	Click Me	1	-0.343	153	-16.45	1	0	0	0	861

## Sheet: AS-tDR-002004
Predicted target genes for AS-tDR-002004
# Column A: Seqname, the name the sequence.
# Column B: GeneSymbol, the official gene symbol of the sequence.
# Column C: Type, the type of the transcipt.
# Column D: Diagrams, the diagrams illustrate key features for miRNA binding. See Ref [1,2] for details.
# Column E: Total, the total number of the binding sites on the targets.
# Column F: Context+, the sum of the context+ scores used in TargetScan after version 6.0. More negative is better. See Ref [3] for details.
# Column G: Structure, the sum of the structure scores used in miRanda (Ref [4]). The higher the better.
# Column H: Energy, the sum of the free energy predicted by miRanda (Ref [4]). More negative is better.
# Column I ~ Column L: Counting numbers for different seed match types
# Reference:
[1] Grimson A., et al. MicroRNA Targeting Specificity in Mammals: Determinants beyond Seed Pairing. Molecular Cell, Volume 27, Issue 1, 91-105, 6 July 2007.
[2] Amy E. Pasquinelli. MicroRNAs and their targets: recognition, regulation and an emerging reciprocal relationship. Nature Reviews Genetics, Volume 13, 271-282, 1 April 2012.
[3] David M Garcia., et al. Weak Seed-Pairing Stability and High Target-Site Abundance Decrease the Proficiency of lsy-6 and Other miRNAs. Nat. Struct. Mol. Biol., Volume 18, 1139-1146, 2011.
[4] Enright AJ., el al. miRanda algorithm: MicroRNA targets in Drosophila. Genome Biology, Volume 5, R1, 2003.
Target genes for AS-tDR-002004
Target			Sites		TargetScan	miranda		Seed match types				Annotations
Seqname	GeneSymbol	Type	Diagrams	Total	Context+	Structure	Energy	8mer-1a	7mer-m8	7mer-1a	Imperfect	UTR Length
ENSRNOT00000001198	Kctd7	Coding	Click Me	1	-0.335	160	-20.58	1	0	0	0	457
ENSRNOT00000001664	Ddt	Coding	Click Me	1	-0.305	147	-18.17	1	0	0	0	180
ENSRNOT00000068214	Efr3b	Coding	Click Me	1	-0.388	140	-13.39	1	0	0	0	1411
ENSRNOT00000044805	Dnajb12	Coding	Click Me	1	-0.345	144	-14.95	1	0	0	0	1713
ENSRNOT00000004083	Tiprl	Coding	Click Me	1	-0.395	152	-13.94	1	0	0	0	828
ENSRNOT00000002533	Mapk1	Coding	Click Me	1	-0.426	155	-19.15	1	0	0	0	217
ENSRNOT00000064305	PVR	Coding	Click Me	1	-0.359	144	-13.72	1	0	0	0	857
ENSRNOT00000091193	Wap	Coding	Click Me	1	-0.424	148	-13.4	1	0	0	0	126
ENSRNOT00000085887	Klrb1a	Coding	Click Me	1	-0.318	144	-13.05	0	1	0	0	50
ENSRNOT00000008478	Sulf2	Coding	Click Me	1	-0.315	140	-13.56	1	0	0	0	891
ENSRNOT00000078320	Fam227a	Coding	Click Me	1	-0.402	151	-23.24	1	0	0	0	1001
ENSRNOT00000077201	Trim26	Coding	Click Me	1	-0.355	142	-13.52	1	0	0	0	2873
ENSRNOT00000085255	Gdf2	Coding	Click Me	1	-0.335	142	-11.9	1	0	0	0	1243
ENSRNOT00000059424	LOC688389	Coding	Click Me	1	-0.339	140	-11.33	0	1	0	0	50
ENSRNOT00000019190	Extl2	Coding	Click Me	1	-0.321	141	-13.68	1	0	0	0	819
ENSRNOT00000014964	Plac9	Coding	Click Me	1	-0.414	152	-16.05	1	0	0	0	563
ENSRNOT00000092189	Glra1	Coding	Click Me	1	-0.39	143	-12.48	1	0	0	0	1033
ENSRNOT00000005523	Mgat4c	Coding	Click Me	1	-0.426	140	-12.29	1	0	0	0	1160
ENSRNOT00000084259	Rab29	Coding	Click Me	1	-0.372	143	-12.19	1	0	0	0	830
ENSRNOT00000028178	Arl4d	Coding	Click Me	1	-0.305	145	-15.74	1	0	0	0	593
ENSRNOT00000079290	Il9r	Coding	Click Me	1	-0.312	140	-11.01	1	0	0	0	4011
ENSRNOT00000008003	Foxm1	Coding	Click Me	1	-0.323	146	-12.57	1	0	0	0	987
ENSRNOT00000009435	Hyal6	Coding	Click Me	1	-0.304	140	-13.14	0	1	0	0	812
ENSRNOT00000088589	Gpd2	Coding	Click Me	1	-0.315	142	-15.81	1	0	0	0	1257
ENSRNOT00000006141	F11r	Coding	Click Me	1	-0.302	148	-21.22	0	1	0	0	1383
ENSRNOT00000073052	1700092M07Rik	Coding	Click Me	1	-0.428	141	-11.71	1	0	0	0	50
ENSRNOT00000089458	Fndc1	Coding	Click Me	1	-0.368	149	-12.49	1	0	0	0	658
ENSRNOT00000011768	Myo5c	Coding	Click Me	1	-0.339	150	-16.66	1	0	0	0	702
ENSRNOT00000016037	Perp	Coding	Click Me	1	-0.379	140	-11.04	1	0	0	0	1191
ENSRNOT00000019652	Cpt1a	Coding	Click Me	1	-0.311	140	-11.71	1	0	0	0	1954
ENSRNOT00000006246	Il10	Coding	Click Me	1	-0.402	150	-14.69	1	0	0	0	141
ENSRNOT00000081806	AABR07017617.1	Coding	Click Me	1	-0.345	152	-16.46	1	0	0	0	480
ENSRNOT00000052130	Lexm	Coding	Click Me	1	-0.354	140	-15.43	1	0	0	0	694
ENSRNOT00000052131	Fam98a	Coding	Click Me	1	-0.327	145	-17.57	1	0	0	0	1066
ENSRNOT00000009665	Laptm4a	Coding	Click Me	1	-0.379	145	-15	1	0	0	0	497
ENSRNOT00000067664	Phf21a	Coding	Click Me	1	-0.397	146	-14.76	1	0	0	0	468
ENSRNOT00000057738	Pik3ip1	Coding	Click Me	1	-0.3	140	-16.54	1	0	0	0	1359
ENSRNOT00000075948	Atp1b1	Coding	Click Me	1	-0.364	140	-15.13	1	0	0	0	50
ENSRNOT00000008645	Borcs5	Coding	Click Me	1	-0.418	162	-18.94	1	0	0	0	1210
ENSRNOT00000082242	Patz1	Coding	Click Me	1	-0.345	152	-14.99	1	0	0	0	1376
ENSRNOT00000031748	Pkn2	Coding	Click Me	1	-0.323	145	-14.22	1	0	0	0	2281
ENSRNOT00000026355	Cyp8b1	Coding	Click Me	1	-0.461	172	-24.49	1	0	0	0	435
ENSRNOT00000078851	Alpl	Coding	Click Me	1	-0.311	143	-14.93	1	0	0	0	581
ENSRNOT00000016856	Stk17b	Coding	Click Me	1	-0.362	156	-12.5	1	0	0	0	1966
ENSRNOT00000046937	Slc5a12	Coding	Click Me	1	-0.385	148	-14.22	1	0	0	0	1802
ENSRNOT00000036454	Lrrn4cl	Coding	Click Me	1	-0.339	153	-21.27	1	0	0	0	2024
ENSRNOT00000017859	Ccdc150	Coding	Click Me	1	-0.326	140	-16.44	1	0	0	0	50
ENSRNOT00000023628	Hspa4	Coding	Click Me	1	-0.383	154	-16.56	1	0	0	0	1769
ENSRNOT00000017604	Olr376	Coding	Click Me	1	-0.308	159	-18.65	0	1	0	0	50
ENSRNOT00000087242	Scn2a	Coding	Click Me	1	-0.418	158	-15.33	1	0	0	0	2822
ENSRNOT00000023256	Slc2a4	Coding	Click Me	1	-0.33	140	-11.71	1	0	0	0	833
ENSRNOT00000087240	Myog	Coding	Click Me	1	-0.338	157	-21.57	1	0	0	0	547
ENSRNOT00000061619	Nifk	Coding	Click Me	1	-0.335	146	-11.71	1	0	0	0	870
ENSRNOT00000012462	Tbkbp1	Coding	Click Me	1	-0.324	148	-15.39	1	0	0	0	1341
ENSRNOT00000037576	Pdyn	Coding	Click Me	1	-0.301	153	-15.86	1	0	0	0	1454
ENSRNOT00000007219	Egln3	Coding	Click Me	1	-0.315	140	-11.71	1	0	0	0	1560
NM_001004233	Mkrn1	Coding	Click Me	1	-0.3	149	-12.51	0	1	0	0	449
ENSRNOT00000072261	Rin1	Coding	Click Me	1	-0.338	140	-11.01	1	0	0	0	2345
ENSRNOT00000063839	AABR07002774.2	Coding	Click Me	1	-0.407	145	-16.89	1	0	0	0	195
ENSRNOT00000013116	Cyp7b1	Coding	Click Me	1	-0.324	143	-15.27	1	0	0	0	981
ENSRNOT00000006067	Coro7	Coding	Click Me	1	-0.31	144	-15.91	1	0	0	0	195
NM_001108638	Slc25a26	Coding	Click Me	1	-0.373	149	-15.05	1	0	0	0	1776
ENSRNOT00000054939	Slc16a3	Coding	Click Me	1	-0.339	151	-21.71	1	0	0	0	610
ENSRNOT00000027773	Actn4	Coding	Click Me	1	-0.421	143	-11.04	1	0	0	0	1023
ENSRNOT00000054931	Sectm1a	Coding	Click Me	1	-0.378	147	-16.91	1	0	0	0	866
ENSRNOT00000064828	Hltf	Coding	Click Me	1	-0.32	156	-13.65	1	0	0	0	1672
ENSRNOT00000082348	Rab34	Coding	Click Me	1	-0.382	148	-19.06	1	0	0	0	50
ENSRNOT00000044129	Ptchd1	Coding	Click Me	1	-0.302	146	-13.11	1	0	0	0	3809
ENSRNOT00000026536	Haghl	Coding	Click Me	1	-0.358	155	-18.19	1	0	0	0	196
ENSRNOT00000075241	Tcta	Coding	Click Me	2	-0.683	287	-31.64	2	0	0	0	1229
ENSRNOT00000034449	Ermn	Coding	Click Me	1	-0.375	141	-12.09	1	0	0	0	774
ENSRNOT00000026953	Gdap2	Coding	Click Me	1	-0.401	154	-18.28	1	0	0	0	974
ENSRNOT00000009963	Gli2	Coding	Click Me	1	-0.369	156	-12.61	1	0	0	0	1534
ENSRNOT00000067566	Mob3c	Coding	Click Me	1	-0.315	140	-11.04	1	0	0	0	2042
ENSRNOT00000002550	Snap29	Coding	Click Me	1	-0.315	140	-12.01	1	0	0	0	2528
ENSRNOT00000011383	Stoml1	Coding	Click Me	1	-0.321	147	-14.54	1	0	0	0	714
ENSRNOT00000000212	Cyp19a1	Coding	Click Me	1	-0.308	140	-11.83	1	0	0	0	736
ENSRNOT00000086082	Rab11fip1	Coding	Click Me	1	-0.336	140	-13.52	1	0	0	0	1352
ENSRNOT00000010007	Fhl3	Coding	Click Me	1	-0.363	141	-12	1	0	0	0	656
ENSRNOT00000048875	Pknox2	Coding	Click Me	1	-0.306	147	-13.34	1	0	0	0	1462
NM_013188	Pygb	Coding	Click Me	1	-0.333	140	-11.17	1	0	0	0	1217
ENSRNOT00000006729	Prkch	Coding	Click Me	1	-0.462	140	-16.28	1	0	0	0	50
ENSRNOT00000083446	Glud1	Coding	Click Me	1	-0.307	151	-16.31	1	0	0	0	1127
ENSRNOT00000067314	Pole4	Coding	Click Me	1	-0.315	142	-14.03	0	1	0	0	1320
ENSRNOT00000078668	Axl	Coding	Click Me	1	-0.315	140	-11.98	1	0	0	0	1469
ENSRNOT00000057218	Naglt1	Coding	Click Me	1	-0.309	146	-12.8	1	0	0	0	1046
ENSRNOT00000060810	Dtnb	Coding	Click Me	1	-0.391	156	-15.22	1	0	0	0	1085
ENSRNOT00000087449	Rasl11a	Coding	Click Me	1	-0.314	143	-13.14	0	1	0	0	306
ENSRNOT00000021804	Polr3g	Coding	Click Me	1	-0.376	140	-12.04	1	0	0	0	2200
ENSRNOT00000025993	Atp5f1c	Coding	Click Me	1	-0.396	148	-13.25	1	0	0	0	2700
NM_001007719	Hsd3b3	Coding	Click Me	1	-0.327	148	-14.57	1	0	0	0	340
ENSRNOT00000023268	Zfp322a	Coding	Click Me	1	-0.372	158	-20.34	1	0	0	0	1383
ENSRNOT00000035049	Atp13a5	Coding	Click Me	1	-0.361	149	-14.66	1	0	0	0	690
ENSRNOT00000040754	Olr1765	Coding	Click Me	1	-0.407	140	-11.23	1	0	0	0	50
ENSRNOT00000040056	Cish	Coding	Click Me	1	-0.36	151	-16.51	1	0	0	0	2195
ENSRNOT00000040505	Cop1	Coding	Click Me	1	-0.398	147	-14.21	1	0	0	0	612
ENSRNOT00000026312	Sh3bp4	Coding	Click Me	1	-0.386	146	-16.14	1	0	0	0	1757
ENSRNOT00000084809	Ambra1	Coding	Click Me	1	-0.348	153	-21.61	1	0	0	0	307
ENSRNOT00000076400	Gpc6	Coding	Click Me	1	-0.415	142	-11.95	1	0	0	0	313
ENSRNOT00000028347	Cd6	Coding	Click Me	1	-0.411	151	-16.41	1	0	0	0	843
ENSRNOT00000005078	Zdhhc17	Coding	Click Me	1	-0.336	145	-18.81	1	0	0	0	1006
ENSRNOT00000017736	Setd7	Coding	Click Me	1	-0.328	145	-15.94	1	0	0	0	777
ENSRNOT00000030425	AC141969.1	Coding	Click Me	1	-0.327	142	-12.55	1	0	0	0	1768
ENSRNOT00000012217	RGD1561795	Coding	Click Me	1	-0.419	145	-14.45	1	0	0	0	272
ENSRNOT00000066617	Fndc11	Coding	Click Me	1	-0.32	156	-21.11	1	0	0	0	1253
ENSRNOT00000000522	RT1-Db1	Coding	Click Me	1	-0.389	140	-12.27	1	0	0	0	310
ENSRNOT00000006095	Pou6f1	Coding	Click Me	1	-0.379	148	-15.21	1	0	0	0	522
ENSRNOT00000066856	RGD1304770	Coding	Click Me	1	-0.347	154	-17.2	1	0	0	0	755
ENSRNOT00000019011	Ift46	Coding	Click Me	1	-0.409	149	-17.04	1	0	0	0	289
NM_001107201	Prox1	Coding	Click Me	1	-0.345	155	-15.62	1	0	0	0	1900
ENSRNOT00000003600	Ddx52	Coding	Click Me	1	-0.442	140	-11.01	1	0	0	0	1233
ENSRNOT00000018303	Atp6v1b1	Coding	Click Me	1	-0.306	141	-11.62	1	0	0	0	2333
ENSRNOT00000086029	AABR07001905.2	Coding	Click Me	1	-0.402	146	-16.29	1	0	0	0	195
NM_031083	Pi4kb	Coding	Click Me	1	-0.3	140	-11.3	1	0	0	0	388
ENSRNOT00000049831	Sft2d1	Coding	Click Me	1	-0.327	142	-13.16	1	0	0	0	443
ENSRNOT00000006979	Tfap4	Coding	Click Me	1	-0.341	151	-12.64	1	0	0	0	1309
ENSRNOT00000007870	Hsd11b1	Coding	Click Me	1	-0.384	140	-12.04	1	0	0	0	320
ENSRNOT00000028974	Adamdec1	Coding	Click Me	1	-0.36	150	-16.19	1	0	0	0	995
ENSRNOT00000004173	Spryd4	Coding	Click Me	1	-0.354	154	-14.31	1	0	0	0	845
ENSRNOT00000072819	LOC108348122	Coding	Click Me	1	-0.314	160	-15.21	1	0	0	0	1731
ENSRNOT00000074847	Nup62	Coding	Click Me	1	-0.308	145	-13.52	1	0	0	0	648
ENSRNOT00000089014	Hikeshi	Coding	Click Me	1	-0.348	140	-11.04	1	0	0	0	460
ENSRNOT00000019346	A2m	Coding	Click Me	1	-0.502	147	-11.04	1	0	0	0	110
ENSRNOT00000019778	Csgalnact2	Coding	Click Me	1	-0.367	140	-11.04	1	0	0	0	1625
ENSRNOT00000082901	AABR07017634.1	Coding	Click Me	1	-0.38	146	-15.24	1	0	0	0	1399
ENSRNOT00000014541	Dennd3	Coding	Click Me	1	-0.337	151	-13.56	1	0	0	0	1567
ENSRNOT00000023414	Atrnl1	Coding	Click Me	1	-0.38	152	-18.11	1	0	0	0	3282
ENSRNOT00000000639	Ccdc167	Coding	Click Me	1	-0.356	140	-11.91	1	0	0	0	578
ENSRNOT00000004676	Fundc1	Coding	Click Me	1	-0.35	144	-13.51	1	0	0	0	1360
ENSRNOT00000086531	Bicdl1	Coding	Click Me	1	-0.304	146	-15.24	1	0	0	0	1281
ENSRNOT00000025928	Fas	Coding	Click Me	1	-0.364	155	-18.92	1	0	0	0	1521
ENSRNOT00000004386	Myoc	Coding	Click Me	1	-0.378	155	-19.43	1	0	0	0	465
ENSRNOT00000033396	Faap24	Coding	Click Me	1	-0.36	140	-15.9	1	0	0	0	676
ENSRNOT00000031904	Fitm2	Coding	Click Me	1	-0.38	146	-11.93	1	0	0	0	3543
ENSRNOT00000041908	Fmo1	Coding	Click Me	1	-0.33	145	-14.22	1	0	0	0	401
ENSRNOT00000001738	Atp2a2	Coding	Click Me	1	-0.3	140	-15.27	1	0	0	0	780
ENSRNOT00000013342	Spry2	Coding	Click Me	1	-0.38	140	-11.01	1	0	0	0	645
ENSRNOT00000016242	Pomt2	Coding	Click Me	1	-0.459	151	-13.43	1	0	0	0	2340
ENSRNOT00000005423	Ccdc42	Coding	Click Me	2	-0.654	285	-28.02	2	0	0	0	2130
ENSRNOT00000040650	Hibch	Coding	Click Me	1	-0.373	163	-18.45	1	0	0	0	663
ENSRNOT00000017363	Spsb4	Coding	Click Me	1	-0.401	143	-12.24	1	0	0	0	1241
ENSRNOT00000083787	Thoc7	Coding	Click Me	1	-0.324	140	-11.04	1	0	0	0	602
ENSRNOT00000091129	Sdk2	Coding	Click Me	1	-0.394	140	-11.61	1	0	0	0	683
ENSRNOT00000001583	Rrp1b	Coding	Click Me	1	-0.353	153	-13.25	1	0	0	0	2156
ENSRNOT00000025564	Mchr1	Coding	Click Me	1	-0.365	143	-13.93	1	0	0	0	763
ENSRNOT00000033493	Mlh3	Coding	Click Me	1	-0.359	140	-12.32	1	0	0	0	1012
ENSRNOT00000072271	Znrf2	Coding	Click Me	1	-0.32	154	-19.18	1	0	0	0	5014
ENSRNOT00000013423	Akr1b7	Coding	Click Me	1	-0.374	155	-19.12	1	0	0	0	301
ENSRNOT00000033420	Ccdc14	Coding	Click Me	1	-0.342	147	-16.16	1	0	0	0	2113
NM_001108600	Actr5	Coding	Click Me	1	-0.376	156	-21.35	1	0	0	0	1390
ENSRNOT00000083702	Akap12	Coding	Click Me	1	-0.336	148	-17.04	1	0	0	0	1005
NM_001191688	Pcdh9	Coding	Click Me	1	-0.39	140	-13	1	0	0	0	1805
ENSRNOT00000077616	Wdyhv1	Coding	Click Me	1	-0.369	142	-11.04	1	0	0	0	661
ENSRNOT00000011308	LOC100360940	Coding	Click Me	1	-0.36	140	-11.71	1	0	0	0	680
ENSRNOT00000083979	Tmem169	Coding	Click Me	1	-0.461	140	-14.14	1	0	0	0	1772
ENSRNOT00000036413	Lair1	Coding	Click Me	1	-0.376	141	-12.98	1	0	0	0	322
ENSRNOT00000084018	Tbx3	Coding	Click Me	1	-0.309	142	-14.87	1	0	0	0	589
ENSRNOT00000001764	Specc1l	Coding	Click Me	1	-0.324	140	-12.69	1	0	0	0	2467
ENSRNOT00000068236	Daw1	Coding	Click Me	1	-0.34	143	-11.01	1	0	0	0	384
ENSRNOT00000016389	Alkbh1	Coding	Click Me	1	-0.353	145	-15.72	1	0	0	0	2609
ENSRNOT00000012963	Ripk2	Coding	Click Me	1	-0.394	159	-19.83	1	0	0	0	1555
ENSRNOT00000066893	Sik2	Coding	Click Me	1	-0.303	150	-16.3	1	0	0	0	4202
ENSRNOT00000011474	Snx11	Coding	Click Me	1	-0.345	140	-15.61	1	0	0	0	1516
ENSRNOT00000064776	Gga3	Coding	Click Me	1	-0.368	147	-16.59	1	0	0	0	1529
ENSRNOT00000042156	Slc39a11	Coding	Click Me	1	-0.357	143	-12.36	1	0	0	0	1528
ENSRNOT00000018233	Pglyrp1	Coding	Click Me	1	-0.32	145	-11.51	1	0	0	0	103
ENSRNOT00000022425	Tm2d2	Coding	Click Me	1	-0.38	140	-11.71	1	0	0	0	536
ENSRNOT00000022631	Cbx7	Coding	Click Me	1	-0.362	142	-14.95	1	0	0	0	2507
ENSRNOT00000017948	Mrgprf	Coding	Click Me	1	-0.323	145	-15.24	1	0	0	0	824
ENSRNOT00000027439	Rab11fip3	Coding	Click Me	1	-0.49	140	-11.04	1	0	0	0	1493
ENSRNOT00000090152	Fnip2	Coding	Click Me	1	-0.342	142	-14.75	1	0	0	0	877
ENSRNOT00000055408	Defb24	Coding	Click Me	1	-0.35	148	-17.38	1	0	0	0	175
ENSRNOT00000027957	Psme3	Coding	Click Me	1	-0.327	140	-11.9	1	0	0	0	1649
ENSRNOT00000014763	Twist1	Coding	Click Me	1	-0.399	142	-14.49	1	0	0	0	684
ENSRNOT00000041119	Stxbp4	Coding	Click Me	1	-0.361	152	-21.09	1	0	0	0	524
ENSRNOT00000022511	Trmu	Coding	Click Me	1	-0.309	157	-20.84	1	0	0	0	240
ENSRNOT00000090387	Ggps1	Coding	Click Me	1	-0.319	140	-12.94	1	0	0	0	1789
ENSRNOT00000006542	Sec14l2	Coding	Click Me	1	-0.304	143	-15.11	1	0	0	0	1326
ENSRNOT00000086609	Napepld	Coding	Click Me	1	-0.366	145	-14.78	1	0	0	0	158
ENSRNOT00000026437	Tm4sf5	Coding	Click Me	1	-0.329	142	-15.29	1	0	0	0	305
ENSRNOT00000086117	Aifm3	Coding	Click Me	1	-0.311	140	-12.35	1	0	0	0	739
ENSRNOT00000004740	Rufy1	Coding	Click Me	1	-0.33	146	-14.37	1	0	0	0	509
ENSRNOT00000017247	Dnajc16	Coding	Click Me	1	-0.403	144	-20.88	1	0	0	0	196
ENSRNOT00000055960	RGD1309110	Coding	Click Me	1	-0.493	150	-12.79	1	0	0	0	50
ENSRNOT00000029660	Id1	Coding	Click Me	1	-0.361	159	-17.48	1	0	0	0	400
ENSRNOT00000007491	Cpa6	Coding	Click Me	1	-0.388	142	-11.71	1	0	0	0	406
ENSRNOT00000055286	Krtap31-1	Coding	Click Me	1	-0.376	140	-12.27	1	0	0	0	338
ENSRNOT00000051525	Clec4a2	Coding	Click Me	1	-0.412	151	-20.37	1	0	0	0	340
ENSRNOT00000019361	Edn1	Coding	Click Me	1	-0.304	141	-13.52	1	0	0	0	589
ENSRNOT00000004842	Tnfrsf12a	Coding	Click Me	1	-0.339	140	-11.42	1	0	0	0	541
ENSRNOT00000000013	Tcf15	Coding	Click Me	1	-0.344	148	-14.47	1	0	0	0	339
ENSRNOT00000007261	Snupn	Coding	Click Me	1	-0.436	156	-18.29	1	0	0	0	234
ENSRNOT00000018386	Wfdc5	Coding	Click Me	1	-0.374	140	-13.47	1	0	0	0	680
ENSRNOT00000027053	Kxd1	Coding	Click Me	1	-0.312	142	-13.3	1	0	0	0	536
ENSRNOT00000056436	Tuft1	Coding	Click Me	1	-0.306	156	-18.62	1	0	0	0	1512
ENSRNOT00000009280	Rab7b	Coding	Click Me	1	-0.302	145	-13.6	1	0	0	0	1581
ENSRNOT00000030583	Sh2b3	Coding	Click Me	1	-0.364	140	-11.01	1	0	0	0	2339
ENSRNOT00000017339	Msr1	Coding	Click Me	1	-0.383	142	-16.51	1	0	0	0	4291
ENSRNOT00000076098	Fam174b	Coding	Click Me	1	-0.339	146	-13.77	1	0	0	0	854
ENSRNOT00000016757	Kcnv2	Coding	Click Me	1	-0.322	143	-11.04	1	0	0	0	3402
ENSRNOT00000013461	Rpl4	Coding	Click Me	1	-0.483	150	-11.04	1	0	0	0	67
ENSRNOT00000031893	AABR07069466.1	Coding	Click Me	1	-0.368	140	-11.63	1	0	0	0	560
ENSRNOT00000029021	Wipf2	Coding	Click Me	1	-0.343	140	-11.2	1	0	0	0	590
ENSRNOT00000085525	Art3	Coding	Click Me	1	-0.381	148	-19.64	1	0	0	0	254
ENSRNOT00000039447	LOC691551	Coding	Click Me	1	-0.329	160	-12.76	0	1	0	0	146
ENSRNOT00000072327	Dzip1-ps1	Coding	Click Me	1	-0.321	148	-16.77	1	0	0	0	691
ENSRNOT00000082167	AABR07017635.2	Coding	Click Me	1	-0.378	146	-15.24	1	0	0	0	1667
ENSRNOT00000075072	Dennd1b	Coding	Click Me	1	-0.39	140	-13.57	1	0	0	0	50
ENSRNOT00000027690	Fndc7	Coding	Click Me	1	-0.3	148	-18.5	1	0	0	0	1056
ENSRNOT00000018071	LOC102549712	Coding	Click Me	1	-0.313	143	-13.12	1	0	0	0	367
ENSRNOT00000021073	Tpm4	Coding	Click Me	1	-0.358	142	-11.01	1	0	0	0	196
ENSRNOT00000023899	Pi15	Coding	Click Me	1	-0.375	145	-13.48	1	0	0	0	800
ENSRNOT00000039221	Tnfsf18	Coding	Click Me	1	-0.39	154	-16.64	1	0	0	0	1499
ENSRNOT00000084698	Micu2	Coding	Click Me	1	-0.319	158	-20.94	1	0	0	0	981
ENSRNOT00000066447	Kif13a	Coding	Click Me	1	-0.333	140	-11.16	1	0	0	0	1539
ENSRNOT00000013639	Sarm1	Coding	Click Me	1	-0.364	141	-12.5	1	0	0	0	1734
ENSRNOT00000014496	RGD1309534	Coding	Click Me	1	-0.317	156	-19.75	1	0	0	0	1326
ENSRNOT00000025382	Sgsm3	Coding	Click Me	1	-0.336	140	-11.04	1	0	0	0	431
ENSRNOT00000083145	Serpinb12	Coding	Click Me	1	-0.447	147	-12.89	1	0	0	0	557
ENSRNOT00000083146	Bcl11a	Coding	Click Me	1	-0.335	145	-16.23	1	0	0	0	875
ENSRNOT00000015420	Scp2	Coding	Click Me	1	-0.431	140	-11.82	1	0	0	0	906
ENSRNOT00000089716	Mtg2	Coding	Click Me	1	-0.421	151	-11.12	1	0	0	0	133
ENSRNOT00000014153	Igfbp4	Coding	Click Me	1	-0.457	144	-13.54	1	0	0	0	1169
ENSRNOT00000022410	Rnmt	Coding	Click Me	1	-0.398	144	-19.17	1	0	0	0	1822
ENSRNOT00000043737	Lrrc2	Coding	Click Me	1	-0.308	145	-15.15	1	0	0	0	1318
ENSRNOT00000049993	Ccdc159	Coding	Click Me	1	-0.378	140	-12.34	1	0	0	0	177
ENSRNOT00000020297	Lrrc39	Coding	Click Me	1	-0.403	148	-12.41	1	0	0	0	1636
ENSRNOT00000084766	Lmod1	Coding	Click Me	1	-0.313	145	-12.53	1	0	0	0	2492
ENSRNOT00000084768	Tnk2	Coding	Click Me	1	-0.459	140	-11.24	1	0	0	0	811
ENSRNOT00000072786	Arhgef16	Coding	Click Me	1	-0.367	140	-13.13	1	0	0	0	2100
ENSRNOT00000004713	Adamts4	Coding	Click Me	1	-0.329	140	-12.36	1	0	0	0	2714
ENSRNOT00000015678	C1rl	Coding	Click Me	1	-0.319	146	-15.84	1	0	0	0	754
ENSRNOT00000064569	Slc5a9	Coding	Click Me	1	-0.325	150	-15.17	1	0	0	0	1599
ENSRNOT00000022259	Utp15	Coding	Click Me	1	-0.306	140	-11.71	1	0	0	0	854
ENSRNOT00000020751	Zfp418	Coding	Click Me	1	-0.378	140	-12.38	1	0	0	0	2076
ENSRNOT00000018854	Nat1	Coding	Click Me	1	-0.442	140	-11.59	1	0	0	0	748
ENSRNOT00000082869	AABR07021704.1	Coding	Click Me	1	-0.332	140	-11.71	1	0	0	0	1843
ENSRNOT00000093708	Mpl	Coding	Click Me	1	-0.321	146	-13.51	1	0	0	0	292
ENSRNOT00000008360	Tle6	Coding	Click Me	1	-0.38	140	-12.29	1	0	0	0	137
ENSRNOT00000093701	AABR07037451.2	Coding	Click Me	1	-0.323	140	-11.04	1	0	0	0	2812
ENSRNOT00000093706	Robo2	Coding	Click Me	1	-0.407	148	-16.91	1	0	0	0	50
ENSRNOT00000009496	Neo1	Coding	Click Me	1	-0.337	160	-19.51	1	0	0	0	765
NM_001190346	Ces2h	Coding	Click Me	1	-0.334	140	-11.04	1	0	0	0	455
ENSRNOT00000011223	Nfrkb	Coding	Click Me	1	-0.35	156	-15.86	1	0	0	0	1151
ENSRNOT00000058334	Pla2g4c	Coding	Click Me	1	-0.333	149	-16.9	1	0	0	0	1642
ENSRNOT00000022749	Chst4	Coding	Click Me	1	-0.319	145	-14.07	1	0	0	0	957
ENSRNOT00000061630	Evi5	Coding	Click Me	1	-0.354	140	-11.04	1	0	0	0	3354
ENSRNOT00000039375	Spast	Coding	Click Me	1	-0.361	143	-14.51	1	0	0	0	2736
ENSRNOT00000016713	Dynlrb2	Coding	Click Me	1	-0.386	157	-20.73	1	0	0	0	191
ENSRNOT00000015104	Lgi3	Coding	Click Me	1	-0.303	149	-14.78	1	0	0	0	1290
ENSRNOT00000076748	Pdgfd	Coding	Click Me	1	-0.379	140	-11.71	1	0	0	0	2013
ENSRNOT00000026793	Cadm4	Coding	Click Me	1	-0.302	157	-23.32	1	0	0	0	265
ENSRNOT00000016020	Rem2	Coding	Click Me	1	-0.351	140	-13.57	1	0	0	0	697
ENSRNOT00000027834	Fads1	Coding	Click Me	1	-0.322	164	-20.94	1	0	0	0	1954
ENSRNOT00000037133	Stk39	Coding	Click Me	1	-0.418	140	-13.55	1	0	0	0	1470
ENSRNOT00000058414	Tbc1d14	Coding	Click Me	1	-0.334	140	-13.44	1	0	0	0	2437
ENSRNOT00000001712	Hvcn1	Coding	Click Me	1	-0.319	149	-17.68	1	0	0	0	196
ENSRNOT00000021729	Zadh2	Coding	Click Me	1	-0.42	141	-11.21	1	0	0	0	2152
NM_001047893	Shroom2	Coding	Click Me	1	-0.39	146	-17.27	1	0	0	0	2510
ENSRNOT00000016327	Rasa2	Coding	Click Me	1	-0.315	156	-14.79	1	0	0	0	3259
ENSRNOT00000079517	Clic5	Coding	Click Me	1	-0.41	143	-13.35	1	0	0	0	3159
ENSRNOT00000024975	Cnppd1	Coding	Click Me	1	-0.313	146	-13.43	1	0	0	0	670
ENSRNOT00000038023	Cd27	Coding	Click Me	1	-0.323	145	-16.42	1	0	0	0	754
ENSRNOT00000051058	Dntt	Coding	Click Me	1	-0.334	141	-14.94	1	0	0	0	419
ENSRNOT00000031462	Rdh13	Coding	Click Me	1	-0.314	159	-21.14	1	0	0	0	2023
ENSRNOT00000057471	Pars2	Coding	Click Me	1	-0.341	149	-14.4	1	0	0	0	1638
ENSRNOT00000027520	Slc25a20	Coding	Click Me	1	-0.392	142	-13.51	1	0	0	0	717
ENSRNOT00000019140	Elof1	Coding	Click Me	1	-0.349	145	-13.94	1	0	0	0	536
ENSRNOT00000055200	Snhg11	Coding	Click Me	1	-0.379	159	-18.69	1	0	0	0	1514
ENSRNOT00000082422	Rcsd1	Coding	Click Me	1	-0.403	153	-17.45	1	0	0	0	495
ENSRNOT00000015200	Pex5l	Coding	Click Me	1	-0.338	149	-18.6	1	0	0	0	247
ENSRNOT00000019787	Lbp	Coding	Click Me	1	-0.39	140	-12.22	1	0	0	0	941
ENSRNOT00000018163	Crisp3	Coding	Click Me	1	-0.43	140	-11.01	1	0	0	0	643
ENSRNOT00000083109	Ppard	Coding	Click Me	1	-0.36	142	-12.77	1	0	0	0	3553
ENSRNOT00000065614	Pald1	Coding	Click Me	1	-0.36	140	-24.15	1	0	0	0	1359
ENSRNOT00000066128	AABR07018323.1	Coding	Click Me	1	-0.4	145	-14.81	1	0	0	0	557
ENSRNOT00000090780	Mcam	Coding	Click Me	1	-0.317	151	-19.37	1	0	0	0	943
ENSRNOT00000039002	Slc38a2	Coding	Click Me	1	-0.396	150	-12.87	1	0	0	0	2711
ENSRNOT00000085352	Rcn3	Coding	Click Me	1	-0.328	140	-11.73	1	0	0	0	396
ENSRNOT00000020365	Ist1	Coding	Click Me	1	-0.331	142	-15.36	1	0	0	0	1046
ENSRNOT00000067616	Ece1	Coding	Click Me	1	-0.302	140	-11.01	1	0	0	0	2128
ENSRNOT00000015332	Pkm	Coding	Click Me	1	-0.461	140	-12.81	1	0	0	0	290
ENSRNOT00000068337	Egfl6	Coding	Click Me	1	-0.342	148	-11.21	1	0	0	0	789
ENSRNOT00000030224	Rundc3b	Coding	Click Me	2	-0.74	300	-33.57	2	0	0	0	2131
NM_001309364	Hoxa1	Coding	Click Me	1	-0.419	140	-12.17	1	0	0	0	704
ENSRNOT00000026996	Pla2g15	Coding	Click Me	1	-0.301	152	-19.43	1	0	0	0	1372
ENSRNOT00000005273	Ergic1	Coding	Click Me	1	-0.319	145	-14.57	1	0	0	0	1387
NM_001135709	Epha10	Coding	Click Me	1	-0.338	140	-11.87	1	0	0	0	662
ENSRNOT00000037710	Ttll12	Coding	Click Me	1	-0.352	146	-13.84	1	0	0	0	476
ENSRNOT00000081845	Nr1d2	Coding	Click Me	1	-0.41	155	-21.17	1	0	0	0	2662
ENSRNOT00000083886	Dmrtc2	Coding	Click Me	1	-0.39	142	-12.3	1	0	0	0	723
ENSRNOT00000070925	AABR07044711.1	Coding	Click Me	1	-0.347	140	-12.81	1	0	0	0	520
NM_147206	Cyp3a9	Coding	Click Me	1	-0.421	147	-12.56	1	0	0	0	295
ENSRNOT00000072411	Sulf1	Coding	Click Me	1	-0.331	155	-19.92	1	0	0	0	2336
ENSRNOT00000012170	Pou2f3	Coding	Click Me	1	-0.327	159	-24.02	1	0	0	0	2879
NM_001013870	Trmt1	Coding	Click Me	1	-0.35	152	-19.6	1	0	0	0	1058
ENSRNOT00000016749	Cpne4	Coding	Click Me	1	-0.311	144	-13.9	0	1	0	0	1649
ENSRNOT00000030035	Zfp879	Coding	Click Me	1	-0.459	148	-14.58	1	0	0	0	465
ENSRNOT00000027116	Mlx	Coding	Click Me	1	-0.31	143	-13.9	0	1	0	0	989
ENSRNOT00000091323	RGD1561730	Coding	Click Me	1	-0.306	144	-14.34	1	0	0	0	4119
ENSRNOT00000008364	Emc7	Coding	Click Me	1	-0.486	146	-14	1	0	0	0	341
ENSRNOT00000025467	Tcerg1	Coding	Click Me	1	-0.419	140	-19.34	1	0	0	0	1077
ENSRNOT00000001322	Stxbp2	Coding	Click Me	1	-0.41	142	-11.25	1	0	0	0	324
ENSRNOT00000084594	Fhl1	Coding	Click Me	1	-0.322	148	-17.01	1	0	0	0	1332
ENSRNOT00000009573	Havcr1	Coding	Click Me	1	-0.321	140	-12.3	1	0	0	0	2516
ENSRNOT00000012138	Yipf2	Coding	Click Me	1	-0.396	143	-13.85	1	0	0	0	872
ENSRNOT00000077528	Kdm5c	Coding	Click Me	1	-0.31	142	-12.63	1	0	0	0	788
ENSRNOT00000012913	Prokr1	Coding	Click Me	1	-0.309	140	-15.46	1	0	0	0	1474
ENSRNOT00000059869	Rnf20	Coding	Click Me	1	-0.4	148	-19.48	1	0	0	0	881
ENSRNOT00000011326	Washc4	Coding	Click Me	1	-0.39	140	-12.3	1	0	0	0	196

## Sheet: AS-tDR-002356
Predicted target genes for AS-tDR-002356
# Column A: Seqname, the name the sequence.
# Column B: GeneSymbol, the official gene symbol of the sequence.
# Column C: Type, the type of the transcipt.
# Column D: Diagrams, the diagrams illustrate key features for miRNA binding. See Ref [1,2] for details.
# Column E: Total, the total number of the binding sites on the targets.
# Column F: Context+, the sum of the context+ scores used in TargetScan after version 6.0. More negative is better. See Ref [3] for details.
# Column G: Structure, the sum of the structure scores used in miRanda (Ref [4]). The higher the better.
# Column H: Energy, the sum of the free energy predicted by miRanda (Ref [4]). More negative is better.
# Column I ~ Column L: Counting numbers for different seed match types
# Reference:
[1] Grimson A., et al. MicroRNA Targeting Specificity in Mammals: Determinants beyond Seed Pairing. Molecular Cell, Volume 27, Issue 1, 91-105, 6 July 2007.
[2] Amy E. Pasquinelli. MicroRNAs and their targets: recognition, regulation and an emerging reciprocal relationship. Nature Reviews Genetics, Volume 13, 271-282, 1 April 2012.
[3] David M Garcia., et al. Weak Seed-Pairing Stability and High Target-Site Abundance Decrease the Proficiency of lsy-6 and Other miRNAs. Nat. Struct. Mol. Biol., Volume 18, 1139-1146, 2011.
[4] Enright AJ., el al. miRanda algorithm: MicroRNA targets in Drosophila. Genome Biology, Volume 5, R1, 2003.
Target genes for AS-tDR-002356
Target			Sites		TargetScan	miranda		Seed match types				Annotations
Seqname	GeneSymbol	Type	Diagrams	Total	Context+	Structure	Energy	8mer-1a	7mer-m8	7mer-1a	Imperfect	UTR Length
ENSRNOT00000003001	Shroom3	Coding	Click Me	1	-0.374	152	-16.58	1	0	0	0	824
ENSRNOT00000000513	Notch4	Coding	Click Me	1	-0.381	144	-12.61	1	0	0	0	431
ENSRNOT00000028389	Snx27	Coding	Click Me	1	-0.411	147	-18.27	1	0	0	0	4478
ENSRNOT00000071569	Vps37d	Coding	Click Me	1	-0.326	142	-17.21	1	0	0	0	708
NM_001107539	Fchsd2	Coding	Click Me	1	-0.324	142	-12.61	1	0	0	0	2054
ENSRNOT00000086644	Slc22a5	Coding	Click Me	1	-0.361	142	-18.59	1	0	0	0	1240
ENSRNOT00000002427	Lmln	Coding	Click Me	1	-0.314	153	-17.6	1	0	0	0	2256
ENSRNOT00000086646	Arap2	Coding	Click Me	1	-0.393	153	-19.32	1	0	0	0	1819
NM_013045	Tnr	Coding	Click Me	1	-0.346	145	-15	1	0	0	0	2201
ENSRNOT00000016176	Tmem82	Coding	Click Me	1	-0.376	144	-15.1	1	0	0	0	133
ENSRNOT00000081484	Mat1a	Coding	Click Me	1	-0.307	140	-14.08	1	0	0	0	1655
ENSRNOT00000032859	RGD1304567	Coding	Click Me	1	-0.442	145	-17.86	1	0	0	0	388
ENSRNOT00000019465	Stat4	Coding	Click Me	1	-0.441	154	-18.49	1	0	0	0	1542
NM_001009825	AABR07068351.1	Coding	Click Me	1	-0.443	140	-15.68	1	0	0	0	1201
NM_001108041	Acot3	Coding	Click Me	1	-0.377	154	-19.5	1	0	0	0	629
ENSRNOT00000025686	Tsnaxip1	Coding	Click Me	1	-0.308	145	-15.32	0	1	0	0	391
ENSRNOT00000021758	Fer	Coding	Click Me	1	-0.449	141	-15.87	1	0	0	0	194
ENSRNOT00000003407	Tnr	Coding	Click Me	1	-0.347	145	-15	1	0	0	0	2218
ENSRNOT00000011223	Nfrkb	Coding	Click Me	1	-0.35	149	-17.32	1	0	0	0	1151
ENSRNOT00000004435	Chad	Coding	Click Me	1	-0.334	143	-17.71	1	0	0	0	1040
NM_053476	Synj1	Coding	Click Me	1	-0.342	145	-13.78	1	0	0	0	1948
ENSRNOT00000046157	Tmem170b	Coding	Click Me	1	-0.4	155	-18.13	1	0	0	0	539
ENSRNOT00000087603	Mx2	Coding	Click Me	1	-0.429	141	-16.24	1	0	0	0	204
ENSRNOT00000043820	Fhl1	Coding	Click Me	1	-0.35	157	-18.52	1	0	0	0	1332
ENSRNOT00000059739	Nrcam	Coding	Click Me	1	-0.349	140	-14.37	1	0	0	0	3160
ENSRNOT00000017549	Rpa2	Coding	Click Me	1	-0.386	140	-12.99	1	0	0	0	1185
ENSRNOT00000051908	Nrcam	Coding	Click Me	1	-0.349	140	-14.37	1	0	0	0	3160
ENSRNOT00000002938	Ibsp	Coding	Click Me	1	-0.366	147	-17.33	1	0	0	0	894
ENSRNOT00000082599	Arap2	Coding	Click Me	1	-0.349	153	-19.32	1	0	0	0	1995
ENSRNOT00000042903	Zfp266	Coding	Click Me	1	-0.37	148	-14.26	1	0	0	0	3916
ENSRNOT00000041039	Klf8	Coding	Click Me	1	-0.314	140	-12.61	1	0	0	0	4110
ENSRNOT00000009162	Fhl4	Coding	Click Me	1	-0.437	157	-18.52	1	0	0	0	344
ENSRNOT00000005337	Rptor	Coding	Click Me	1	-0.362	142	-14.72	1	0	0	0	1775
ENSRNOT00000033670	Zbtb40	Coding	Click Me	1	-0.406	142	-14.01	1	0	0	0	195
NM_001017500	LOC498368	Coding	Click Me	1	-0.404	140	-15.68	1	0	0	0	778
ENSRNOT00000079618	Stag1	Coding	Click Me	1	-0.399	140	-12.61	1	0	0	0	1989
ENSRNOT00000085395	Cckbr	Coding	Click Me	1	-0.316	141	-11.86	1	0	0	0	614
ENSRNOT00000075931	Mef2c	Coding	Click Me	1	-0.419	145	-13.19	1	0	0	0	1125
ENSRNOT00000050729	Clcnkb	Coding	Click Me	1	-0.403	145	-14.47	1	0	0	0	217
ENSRNOT00000087274	Fhl1	Coding	Click Me	1	-0.35	157	-18.52	1	0	0	0	1332
ENSRNOT00000066302	Ap3b1	Coding	Click Me	1	-0.414	145	-15	1	0	0	0	561
ENSRNOT00000041726	Syk	Coding	Click Me	1	-0.374	153	-17.58	1	0	0	0	3110
ENSRNOT00000042524	Fchsd2	Coding	Click Me	1	-0.324	142	-12.61	1	0	0	0	2051
ENSRNOT00000022774	Angpt2	Coding	Click Me	1	-0.303	140	-12.95	1	0	0	0	750
NM_012758	Syk	Coding	Click Me	1	-0.373	153	-17.58	1	0	0	0	3113
ENSRNOT00000061812	Ankrd34b	Coding	Click Me	1	-0.368	145	-13.87	1	0	0	0	1141
ENSRNOT00000012645	Arhgap25	Coding	Click Me	1	-0.335	155	-20.43	1	0	0	0	1089
ENSRNOT00000074743	Atp23	Coding	Click Me	1	-0.478	140	-12.61	1	0	0	0	273
ENSRNOT00000083502	Fhl1	Coding	Click Me	1	-0.332	157	-18.52	1	0	0	0	1409
ENSRNOT00000016942	Syk	Coding	Click Me	1	-0.374	153	-17.58	1	0	0	0	3110
ENSRNOT00000016237	Ptp4a1	Coding	Click Me	1	-0.394	141	-12.61	1	0	0	0	1214
ENSRNOT00000072420	Jrkl	Coding	Click Me	1	-0.408	150	-20.34	1	0	0	0	1319
ENSRNOT00000084311	Etv4	Coding	Click Me	1	-0.365	148	-18.12	1	0	0	0	592
ENSRNOT00000067735	Exoc5	Coding	Click Me	1	-0.328	147	-21.55	1	0	0	0	2006
ENSRNOT00000015190	Mat1a	Coding	Click Me	1	-0.307	140	-14.08	1	0	0	0	1667
ENSRNOT00000000074	Fbxo28	Coding	Click Me	1	-0.32	153	-17.97	1	0	0	0	372
ENSRNOT00000025219	Zfand2b	Coding	Click Me	1	-0.362	152	-20.21	1	0	0	0	316
ENSRNOT00000078870	RGD1562608	Coding	Click Me	1	-0.307	140	-15.75	1	0	0	0	1010
ENSRNOT00000027145	Rbm34	Coding	Click Me	1	-0.36	147	-13.11	1	0	0	0	1560
ENSRNOT00000090313	Eloc	Coding	Click Me	1	-0.319	140	-13.15	1	0	0	0	1557
NM_001270563	Eloc	Coding	Click Me	1	-0.318	140	-13.15	1	0	0	0	1566
NM_001100889	Shroom3	Coding	Click Me	1	-0.375	152	-16.58	1	0	0	0	820
ENSRNOT00000001169	Fhl1	Coding	Click Me	1	-0.332	157	-18.52	1	0	0	0	1403
ENSRNOT00000002812	Synj1	Coding	Click Me	1	-0.343	145	-13.78	1	0	0	0	1930
ENSRNOT00000038993	Tepsin	Coding	Click Me	1	-0.337	162	-25.71	1	0	0	0	990
NM_001191820	Supt6h	Coding	Click Me	1	-0.355	145	-16.19	1	0	0	0	833
ENSRNOT00000028213	Etv4	Coding	Click Me	1	-0.365	148	-18.12	1	0	0	0	597
ENSRNOT00000074583	Tnfaip3	Coding	Click Me	1	-0.396	145	-16.15	1	0	0	0	50
ENSRNOT00000036460	Pon2	Coding	Click Me	1	-0.407	144	-14.55	1	0	0	0	635
NM_001135018	Zfp266	Coding	Click Me	1	-0.369	148	-14.26	1	0	0	0	3924
ENSRNOT00000027995	Bckdha	Coding	Click Me	1	-0.321	145	-16.82	1	0	0	0	327
ENSRNOT00000087134	Gad1	Coding	Click Me	1	-0.301	151	-18.75	1	0	0	0	1234
ENSRNOT00000022854	AABR07068351.1	Coding	Click Me	1	-0.443	140	-15.68	1	0	0	0	1198
ENSRNOT00000082813	Eloc	Coding	Click Me	1	-0.319	140	-13.15	1	0	0	0	1557
ENSRNOT00000037399	Ciz1	Coding	Click Me	1	-0.45	144	-15.36	1	0	0	0	2081
ENSRNOT00000084594	Fhl1	Coding	Click Me	1	-0.35	157	-18.52	1	0	0	0	1332
ENSRNOT00000009323	Tmc2	Coding	Click Me	1	-0.388	152	-16.69	1	0	0	0	314
ENSRNOT00000089599	Ap3b1	Coding	Click Me	1	-0.414	145	-15	1	0	0	0	1271
ENSRNOT00000079177	Vsig10	Coding	Click Me	1	-0.342	150	-17.78	1	0	0	0	1431
ENSRNOT00000022358	Pcsk4	Coding	Click Me	1	-0.342	145	-15.7	1	0	0	0	475
ENSRNOT00000079445	Gabbr1	Coding	Click Me	1	-0.458	148	-14.69	1	0	0	0	651
ENSRNOT00000081898	Slc22a5	Coding	Click Me	1	-0.361	142	-18.59	1	0	0	0	1240
ENSRNOT00000025634	Mob3a	Coding	Click Me	1	-0.306	149	-14.9	1	0	0	0	1743
ENSRNOT00000065743	Eif4e2	Coding	Click Me	1	-0.494	145	-13.78	1	0	0	0	328
ENSRNOT00000011340	Slc22a5	Coding	Click Me	1	-0.361	142	-18.59	1	0	0	0	1240
ENSRNOT00000013550	Clcnkb	Coding	Click Me	1	-0.403	145	-14.47	1	0	0	0	217
ENSRNOT00000083088	Nrcam	Coding	Click Me	1	-0.349	140	-14.37	1	0	0	0	3160
ENSRNOT00000027616	Bag3	Coding	Click Me	1	-0.312	154	-16.53	1	0	0	0	499
ENSRNOT00000077016	Vps37d	Coding	Click Me	1	-0.399	142	-17.21	1	0	0	0	430
ENSRNOT00000056430	Fer	Coding	Click Me	1	-0.396	141	-15.87	1	0	0	0	1498
NM_017007	Gad1	Coding	Click Me	1	-0.301	151	-18.75	1	0	0	0	1239
NM_001110151	Snx27	Coding	Click Me	1	-0.41	147	-18.27	1	0	0	0	3669
ENSRNOT00000074805	RGD1561998	Coding	Click Me	1	-0.42	147	-17.83	1	0	0	0	940
NM_031828	Kcnma1	Coding	Click Me	1	-0.438	146	-16.28	1	0	0	0	1219
ENSRNOT00000016759	Supt6h	Coding	Click Me	1	-0.356	145	-16.19	1	0	0	0	830
ENSRNOT00000027129	Kctd13	Coding	Click Me	1	-0.374	147	-14.11	1	0	0	0	528
ENSRNOT00000052033	Synj1	Coding	Click Me	1	-0.343	145	-13.78	1	0	0	0	2942
ENSRNOT00000050222	Nrcam	Coding	Click Me	1	-0.349	140	-14.37	1	0	0	0	3160
ENSRNOT00000028194	Ntf4	Coding	Click Me	1	-0.38	145	-13.08	1	0	0	0	487
ENSRNOT00000032056	Dgkq	Coding	Click Me	1	-0.305	141	-12.61	1	0	0	0	1632
ENSRNOT00000077943	Ptprj	Coding	Click Me	1	-0.401	140	-13.75	1	0	0	0	3578
ENSRNOT00000000008	Gad1	Coding	Click Me	1	-0.301	151	-18.75	1	0	0	0	1254
ENSRNOT00000002982	LOC498368	Coding	Click Me	1	-0.403	140	-15.68	1	0	0	0	777
NM_017019	Il1a	Coding	Click Me	1	-0.396	140	-12.61	1	0	0	0	1120
ENSRNOT00000093019	Tfcp2l1	Coding	Click Me	1	-0.406	140	-14.16	1	0	0	0	1324
NM_001107216	Arap2	Coding	Click Me	1	-0.393	153	-19.32	1	0	0	0	1822
ENSRNOT00000008757	Cntln	Coding	Click Me	1	-0.34	140	-14.97	1	0	0	0	338
ENSRNOT00000079261	Pla2r1	Coding	Click Me	1	-0.316	140	-12.61	1	0	0	0	1857
NM_001271201	Fhl1	Coding	Click Me	1	-0.331	157	-18.52	1	0	0	0	1416
ENSRNOT00000011290	Colec11	Coding	Click Me	1	-0.333	140	-12.78	1	0	0	0	503
NM_001108808	Eif4e2	Coding	Click Me	1	-0.494	145	-13.78	1	0	0	0	331
ENSRNOT00000050236	Eloc	Coding	Click Me	1	-0.319	140	-13.15	1	0	0	0	1557
ENSRNOT00000014129	LOC100911166	Coding	Click Me	1	-0.416	140	-12.98	1	0	0	0	2010
NM_001191871	Zbtb40	Coding	Click Me	1	-0.42	142	-14.01	1	0	0	0	159
ENSRNOT00000084164	Tmem225	Coding	Click Me	1	-0.412	146	-15.63	1	0	0	0	380
ENSRNOT00000076589	Tnr	Coding	Click Me	1	-0.347	145	-15	1	0	0	0	2270
ENSRNOT00000001446	Stard13	Coding	Click Me	2	-0.713	293	-27.51	2	0	0	0	2162
ENSRNOT00000021964	Nim1k	Coding	Click Me	1	-0.367	150	-17.33	1	0	0	0	155
NM_017269	Ptprj	Coding	Click Me	1	-0.402	140	-13.75	1	0	0	0	3573
ENSRNOT00000065528	Actbl2	Coding	Click Me	1	-0.382	140	-12.78	1	0	0	0	1493
ENSRNOT00000071442	Snx27	Coding	Click Me	1	-0.411	147	-18.27	1	0	0	0	3495
ENSRNOT00000087712	Gad1	Coding	Click Me	1	-0.301	151	-18.75	1	0	0	0	1234
ENSRNOT00000028901	Fermt1	Coding	Click Me	1	-0.305	155	-19.44	1	0	0	0	2532
ENSRNOT00000077005	Eif4e2	Coding	Click Me	1	-0.492	145	-13.78	1	0	0	0	335
ENSRNOT00000083632	Irf2	Coding	Click Me	1	-0.426	145	-15.92	1	0	0	0	1624
ENSRNOT00000066917	Stag1	Coding	Click Me	1	-0.399	140	-12.61	1	0	0	0	1982
ENSRNOT00000077671	Kcnma1	Coding	Click Me	1	-0.399	146	-16.28	1	0	0	0	2541

## Sheet:  AS-tDR-002372
Predicted target genes for AS-tDR-002372
# Column A: Seqname, the name the sequence.
# Column B: GeneSymbol, the official gene symbol of the sequence.
# Column C: Type, the type of the transcipt.
# Column D: Diagrams, the diagrams illustrate key features for miRNA binding. See Ref [1,2] for details.
# Column E: Total, the total number of the binding sites on the targets.
# Column F: Context+, the sum of the context+ scores used in TargetScan after version 6.0. More negative is better. See Ref [3] for details.
# Column G: Structure, the sum of the structure scores used in miRanda (Ref [4]). The higher the better.
# Column H: Energy, the sum of the free energy predicted by miRanda (Ref [4]). More negative is better.
# Column I ~ Column L: Counting numbers for different seed match types
# Reference:
[1] Grimson A., et al. MicroRNA Targeting Specificity in Mammals: Determinants beyond Seed Pairing. Molecular Cell, Volume 27, Issue 1, 91-105, 6 July 2007.
[2] Amy E. Pasquinelli. MicroRNAs and their targets: recognition, regulation and an emerging reciprocal relationship. Nature Reviews Genetics, Volume 13, 271-282, 1 April 2012.
[3] David M Garcia., et al. Weak Seed-Pairing Stability and High Target-Site Abundance Decrease the Proficiency of lsy-6 and Other miRNAs. Nat. Struct. Mol. Biol., Volume 18, 1139-1146, 2011.
[4] Enright AJ., el al. miRanda algorithm: MicroRNA targets in Drosophila. Genome Biology, Volume 5, R1, 2003.
Target genes for AS-tDR-002372
Target			Sites		TargetScan	miranda		Seed match types				Annotations
Seqname	GeneSymbol	Type	Diagrams	Total	Context+	Structure	Energy	8mer-1a	7mer-m8	7mer-1a	Imperfect	UTR Length
NM_017173	Serpinh1	Coding	Click Me	1	-0.314	146	-16.42	1	0	0	0	659
ENSRNOT00000082991	Tmco1	Coding	Click Me	1	-0.313	140	-10.14	1	0	0	0	511
ENSRNOT00000082614	Ccl28	Coding	Click Me	1	-0.35	140	-10.88	1	0	0	0	1157
ENSRNOT00000075400	Gng12	Coding	Click Me	1	-0.328	140	-11.13	1	0	0	0	348
ENSRNOT00000009970	Zfp830	Coding	Click Me	1	-0.379	154	-16.11	1	0	0	0	344
ENSRNOT00000007424	Desi1	Coding	Click Me	1	-0.315	149	-13.97	1	0	0	0	723
ENSRNOT00000083289	Bdnf	Coding	Click Me	1	-0.369	153	-13.02	1	0	0	0	2878
ENSRNOT00000079984	Peli3	Coding	Click Me	1	-0.312	140	-15.04	1	0	0	0	3746
ENSRNOT00000086545	Arel1	Coding	Click Me	1	-0.33	151	-16.64	1	0	0	0	196
ENSRNOT00000048175	Adgrl3	Coding	Click Me	1	-0.341	142	-16.72	1	0	0	0	196
ENSRNOT00000017362	Abhd17c	Coding	Click Me	1	-0.362	140	-10.81	1	0	0	0	1196
ENSRNOT00000058834	Adgrg2	Coding	Click Me	1	-0.346	145	-14.02	1	0	0	0	1514
ENSRNOT00000086549	Ift122	Coding	Click Me	1	-0.331	140	-12.58	1	0	0	0	380
ENSRNOT00000017575	Lrp8	Coding	Click Me	1	-0.34	146	-13.83	1	0	0	0	4532
ENSRNOT00000075153	Kcnk5	Coding	Click Me	1	-0.35	144	-12.68	1	0	0	0	1604
ENSRNOT00000015962	Cfl1	Coding	Click Me	1	-0.333	155	-16.99	1	0	0	0	524
ENSRNOT00000025873	Dpp8	Coding	Click Me	1	-0.35	146	-18.35	1	0	0	0	819
ENSRNOT00000027794	Cbln3	Coding	Click Me	1	-0.306	143	-14.01	1	0	0	0	782
ENSRNOT00000011220	Fut8	Coding	Click Me	1	-0.406	141	-12.52	1	0	0	0	684
NM_001106744	Arel1	Coding	Click Me	1	-0.329	151	-16.64	1	0	0	0	2348
ENSRNOT00000022749	Chst4	Coding	Click Me	1	-0.32	158	-19.14	1	0	0	0	957
ENSRNOT00000027494	Hnrnpl	Coding	Click Me	1	-0.315	154	-15.1	1	0	0	0	310
ENSRNOT00000089233	Bdnf	Coding	Click Me	1	-0.369	153	-13.02	1	0	0	0	2878
ENSRNOT00000021758	Fer	Coding	Click Me	1	-0.372	150	-17.89	1	0	0	0	194
ENSRNOT00000064201	Atp6v0a4	Coding	Click Me	1	-0.306	140	-14.94	1	0	0	0	488
ENSRNOT00000014704	Slc25a4	Coding	Click Me	1	-0.41	142	-10.67	1	0	0	0	281
ENSRNOT00000022530	Kcnn2	Coding	Click Me	1	-0.455	145	-12.81	1	0	0	0	50
ENSRNOT00000009319	Peli1	Coding	Click Me	1	-0.352	147	-12.45	1	0	0	0	844
ENSRNOT00000019929	Gpr149	Coding	Click Me	1	-0.311	146	-14.1	1	0	0	0	1087
ENSRNOT00000092292	Daglb	Coding	Click Me	1	-0.315	151	-11.68	1	0	0	0	763
ENSRNOT00000015971	Hnrnpr	Coding	Click Me	1	-0.378	144	-10.09	1	0	0	0	645
ENSRNOT00000027425	Hnrnpl	Coding	Click Me	1	-0.315	154	-15.1	1	0	0	0	310
ENSRNOT00000090083	Mypn	Coding	Click Me	1	-0.304	143	-12.29	1	0	0	0	1058
ENSRNOT00000033670	Zbtb40	Coding	Click Me	1	-0.3	145	-16.93	1	0	0	0	195
ENSRNOT00000022593	Chd8	Coding	Click Me	1	-0.323	142	-12.79	1	0	0	0	434
ENSRNOT00000049394	Defal1	Coding	Click Me	1	-0.308	140	-12.45	1	0	0	0	50
NM_001008522	Aox2	Coding	Click Me	1	-0.372	146	-13.27	1	0	0	0	304
ENSRNOT00000064007	Rbm28	Coding	Click Me	1	-0.379	144	-10.66	1	0	0	0	717
ENSRNOT00000004330	Tp53bp2	Coding	Click Me	1	-0.34	143	-14.71	1	0	0	0	768
ENSRNOT00000080555	Zfp382	Coding	Click Me	1	-0.386	144	-12.74	1	0	0	0	2870
ENSRNOT00000066895	AABR07030359.1	Coding	Click Me	1	-0.355	146	-13.73	1	0	0	0	50
ENSRNOT00000037339	Gbp5	Coding	Click Me	1	-0.319	158	-15.74	1	0	0	0	1049
ENSRNOT00000090445	Bdnf	Coding	Click Me	1	-0.369	153	-13.02	1	0	0	0	2878
ENSRNOT00000043007	Vom2r62	Coding	Click Me	1	-0.317	150	-16.09	1	0	0	0	50
ENSRNOT00000058495	Spry1	Coding	Click Me	1	-0.323	146	-12.68	1	0	0	0	1057
ENSRNOT00000022983	Serpinh1	Coding	Click Me	1	-0.307	146	-16.42	1	0	0	0	681
ENSRNOT00000023507	Snx24	Coding	Click Me	1	-0.357	142	-12.61	1	0	0	0	1271
ENSRNOT00000073910	Ifrd1	Coding	Click Me	1	-0.427	141	-12	1	0	0	0	227
ENSRNOT00000091540	Krt73	Coding	Click Me	1	-0.352	143	-13.9	1	0	0	0	486
ENSRNOT00000020946	Fuca2	Coding	Click Me	1	-0.326	149	-16	1	0	0	0	150
ENSRNOT00000059942	Adgrl3	Coding	Click Me	1	-0.344	142	-16.72	1	0	0	0	893
ENSRNOT00000058833	Adgrg2	Coding	Click Me	1	-0.346	145	-14.02	1	0	0	0	1514
ENSRNOT00000002769	Son	Coding	Click Me	1	-0.323	145	-12.29	1	0	0	0	1043
ENSRNOT00000082894	Trmt10a	Coding	Click Me	1	-0.324	140	-11.21	1	0	0	0	2185
ENSRNOT00000074583	Tnfaip3	Coding	Click Me	1	-0.322	147	-13.47	1	0	0	0	50
ENSRNOT00000071928	Pet100	Coding	Click Me	1	-0.317	151	-16.77	1	0	0	0	936
ENSRNOT00000093748	Slc39a10	Coding	Click Me	1	-0.309	153	-18.93	1	0	0	0	409
ENSRNOT00000047380	Slc52a2	Coding	Click Me	1	-0.342	153	-14.16	1	0	0	0	1163
ENSRNOT00000090853	Rnf125	Coding	Click Me	1	-0.311	146	-10.67	1	0	0	0	529
ENSRNOT00000048711	Cdc42ep3	Coding	Click Me	1	-0.348	152	-13.27	1	0	0	0	700
ENSRNOT00000071324	Vom2r64	Coding	Click Me	1	-0.321	150	-16.09	1	0	0	0	50
ENSRNOT00000027038	Peli3	Coding	Click Me	1	-0.312	140	-15.04	1	0	0	0	410
ENSRNOT00000010073	Ndufaf4	Coding	Click Me	1	-0.31	142	-10.86	1	0	0	0	2459
ENSRNOT00000077703	Bdnf	Coding	Click Me	1	-0.369	153	-13.02	1	0	0	0	2878
ENSRNOT00000079682	Zfp521	Coding	Click Me	1	-0.306	146	-14.71	1	0	0	0	2061
ENSRNOT00000028187	Zfp382	Coding	Click Me	1	-0.386	144	-12.74	1	0	0	0	392
ENSRNOT00000072820	Vom2r64	Coding	Click Me	1	-0.321	150	-16.09	1	0	0	0	50
ENSRNOT00000084486	Ccl28	Coding	Click Me	1	-0.35	140	-10.88	1	0	0	0	888
ENSRNOT00000029266	Ckap2	Coding	Click Me	1	-0.428	143	-12.57	1	0	0	0	515
NM_001309521	Ift122	Coding	Click Me	1	-0.33	140	-12.58	1	0	0	0	369
ENSRNOT00000079883	Atp6v0a4	Coding	Click Me	1	-0.308	140	-14.94	1	0	0	0	482
ENSRNOT00000067034	Spry1	Coding	Click Me	1	-0.365	146	-12.68	1	0	0	0	393
NM_001134790	Dda1	Coding	Click Me	1	-0.302	142	-10.55	0	1	0	0	1463
ENSRNOT00000037360	Efhc2	Coding	Click Me	1	-0.423	152	-13.16	1	0	0	0	470
ENSRNOT00000006554	Limd1	Coding	Click Me	1	-0.301	147	-10.68	1	0	0	0	1399
ENSRNOT00000080591	Ski	Coding	Click Me	1	-0.374	143	-10.48	1	0	0	0	196
NM_144749	Zfp382	Coding	Click Me	1	-0.386	144	-12.74	1	0	0	0	395
ENSRNOT00000023554	Hmgcs1	Coding	Click Me	1	-0.343	150	-15.75	1	0	0	0	1586
ENSRNOT00000006240	Arel1	Coding	Click Me	1	-0.33	151	-16.64	1	0	0	0	2345
ENSRNOT00000051027	P2ry13	Coding	Click Me	1	-0.395	152	-16.12	1	0	0	0	238
ENSRNOT00000084337	Sh3glb1	Coding	Click Me	1	-0.341	145	-12.49	1	0	0	0	613
ENSRNOT00000087722	Chd8	Coding	Click Me	1	-0.328	142	-12.79	1	0	0	0	412
ENSRNOT00000087632	Tfcp2	Coding	Click Me	1	-0.336	147	-11.58	1	0	0	0	1135
ENSRNOT00000023170	Olfr656	Coding	Click Me	1	-0.385	149	-15.14	1	0	0	0	50
ENSRNOT00000026184	Ltbr	Coding	Click Me	1	-0.406	159	-16.96	1	0	0	0	632
ENSRNOT00000044274	Fam118a	Coding	Click Me	1	-0.336	142	-14.33	1	0	0	0	1268
ENSRNOT00000028194	Ntf4	Coding	Click Me	1	-0.405	140	-14.92	1	0	0	0	487
ENSRNOT00000025029	Tex44	Coding	Click Me	1	-0.363	140	-10.13	1	0	0	0	77
ENSRNOT00000003283	Plp1	Coding	Click Me	1	-0.353	154	-19.4	1	0	0	0	2059
ENSRNOT00000080190	Bdnf	Coding	Click Me	1	-0.369	153	-13.02	1	0	0	0	2878
ENSRNOT00000021871	Fubp3	Coding	Click Me	1	-0.376	151	-12.14	1	0	0	0	1347
ENSRNOT00000040116	MGC105567	Coding	Click Me	1	-0.379	153	-13.81	1	0	0	0	767
ENSRNOT00000042215	Vom2r62	Coding	Click Me	1	-0.317	150	-16.09	1	0	0	0	50
ENSRNOT00000083642	Kcnn2	Coding	Click Me	1	-0.455	145	-12.81	1	0	0	0	50
ENSRNOT00000016262	Slc39a10	Coding	Click Me	1	-0.309	153	-18.93	1	0	0	0	2473
ENSRNOT00000073636	Bdnf	Coding	Click Me	1	-0.369	153	-13.02	1	0	0	0	2878
ENSRNOT00000009180	RGD1304624	Coding	Click Me	1	-0.339	148	-12.4	1	0	0	0	168
ENSRNOT00000040770	Adgrg2	Coding	Click Me	1	-0.346	145	-14.02	1	0	0	0	1514
ENSRNOT00000086447	Pax8	Coding	Click Me	1	-0.404	147	-12.53	1	0	0	0	268
ENSRNOT00000064638	Trub2	Coding	Click Me	1	-0.316	145	-12.31	1	0	0	0	281
ENSRNOT00000034394	Aadacl4	Coding	Click Me	1	-0.38	141	-11.19	1	0	0	0	257
ENSRNOT00000057034	Hnrnpl	Coding	Click Me	1	-0.315	154	-15.1	1	0	0	0	287
NM_001270632	Bdnf	Coding	Click Me	1	-0.368	153	-13.02	1	0	0	0	2885
NM_001270637	Bdnf	Coding	Click Me	1	-0.368	153	-13.02	1	0	0	0	2885
ENSRNOT00000056030	Nell1	Coding	Click Me	1	-0.366	147	-10.48	1	0	0	0	395
NM_001191871	Zbtb40	Coding	Click Me	1	-0.321	145	-16.93	1	0	0	0	159
ENSRNOT00000057872	Mypn	Coding	Click Me	1	-0.304	143	-12.29	1	0	0	0	1017
ENSRNOT00000083542	Bdnf	Coding	Click Me	1	-0.369	153	-13.02	1	0	0	0	2878
NM_017268	Hmgcs1	Coding	Click Me	1	-0.34	150	-15.75	1	0	0	0	1616
ENSRNOT00000031058	Pax8	Coding	Click Me	1	-0.404	147	-12.53	1	0	0	0	981
ENSRNOT00000065528	Actbl2	Coding	Click Me	1	-0.31	142	-13.25	1	0	0	0	1493
ENSRNOT00000078543	Bdnf	Coding	Click Me	1	-0.369	153	-13.02	1	0	0	0	2878
ENSRNOT00000007914	Tmx2	Coding	Click Me	1	-0.306	143	-12.59	1	0	0	0	298
ENSRNOT00000044009	Maob	Coding	Click Me	1	-0.308	159	-17.75	1	0	0	0	774
ENSRNOT00000023259	Tmem129	Coding	Click Me	1	-0.391	147	-10.48	1	0	0	0	1173
ENSRNOT00000067262	Kcnn2	Coding	Click Me	1	-0.455	145	-12.81	1	0	0	0	50
NM_001108424	Rnf125	Coding	Click Me	1	-0.342	146	-10.67	1	0	0	0	268
ENSRNOT00000048027	Aox2	Coding	Click Me	1	-0.371	146	-13.27	1	0	0	0	322
NM_001107120	Daglb	Coding	Click Me	1	-0.314	151	-11.68	1	0	0	0	930
ENSRNOT00000044158	Casc4	Coding	Click Me	1	-0.331	140	-10.43	1	0	0	0	2184

## Sheet: AS-tDR-002583
Predicted target genes for AS-tDR-002583
# Column A: Seqname, the name the sequence.
# Column B: GeneSymbol, the official gene symbol of the sequence.
# Column C: Type, the type of the transcipt.
# Column D: Diagrams, the diagrams illustrate key features for miRNA binding. See Ref [1,2] for details.
# Column E: Total, the total number of the binding sites on the targets.
# Column F: Context+, the sum of the context+ scores used in TargetScan after version 6.0. More negative is better. See Ref [3] for details.
# Column G: Structure, the sum of the structure scores used in miRanda (Ref [4]). The higher the better.
# Column H: Energy, the sum of the free energy predicted by miRanda (Ref [4]). More negative is better.
# Column I ~ Column L: Counting numbers for different seed match types
# Reference:
[1] Grimson A., et al. MicroRNA Targeting Specificity in Mammals: Determinants beyond Seed Pairing. Molecular Cell, Volume 27, Issue 1, 91-105, 6 July 2007.
[2] Amy E. Pasquinelli. MicroRNAs and their targets: recognition, regulation and an emerging reciprocal relationship. Nature Reviews Genetics, Volume 13, 271-282, 1 April 2012.
[3] David M Garcia., et al. Weak Seed-Pairing Stability and High Target-Site Abundance Decrease the Proficiency of lsy-6 and Other miRNAs. Nat. Struct. Mol. Biol., Volume 18, 1139-1146, 2011.
[4] Enright AJ., el al. miRanda algorithm: MicroRNA targets in Drosophila. Genome Biology, Volume 5, R1, 2003.
Target genes for AS-tDR-002583
Target			Sites		TargetScan	miranda		Seed match types				Annotations
Seqname	GeneSymbol	Type	Diagrams	Total	Context+	Structure	Energy	8mer-1a	7mer-m8	7mer-1a	Imperfect	UTR Length
ENSRNOT00000067881	Fam19a4	Coding	Click Me	1	-0.385	149	-21.08	1	0	0	0	1352
ENSRNOT00000025472	Ttc9b	Coding	Click Me	1	-0.349	144	-15.19	1	0	0	0	93
ENSRNOT00000014865	Ccl5	Coding	Click Me	1	-0.349	154	-18.22	1	0	0	0	209
ENSRNOT00000002844	Rest	Coding	Click Me	1	-0.354	146	-14.07	1	0	0	0	940
ENSRNOT00000046215	Rai14	Coding	Click Me	1	-0.363	147	-13.81	1	0	0	0	1671
ENSRNOT00000036914	Vom2r75	Coding	Click Me	1	-0.318	140	-13.86	1	0	0	0	891
ENSRNOT00000014657	Tbx18	Coding	Click Me	1	-0.35	144	-14.13	1	0	0	0	2351
ENSRNOT00000006548	Tex35	Coding	Click Me	1	-0.322	144	-16.15	1	0	0	0	187
ENSRNOT00000002043	Kptn	Coding	Click Me	1	-0.322	143	-14.54	1	0	0	0	541
ENSRNOT00000005304	Ttc1	Coding	Click Me	1	-0.324	140	-14.98	1	0	0	0	461
ENSRNOT00000001059	Hsf2	Coding	Click Me	1	-0.375	140	-12.87	1	0	0	0	823
ENSRNOT00000077581	Snai1	Coding	Click Me	1	-0.398	140	-17.76	1	0	0	0	900
ENSRNOT00000091057	Fstl1	Coding	Click Me	1	-0.326	148	-16.27	1	0	0	0	1247
ENSRNOT00000018506	Lrrc41	Coding	Click Me	1	-0.343	145	-17.5	1	0	0	0	485
NM_001013177	LOC100910526	Coding	Click Me	1	-0.408	146	-24.19	1	0	0	0	2056
NM_001034935	Ppef1	Coding	Click Me	1	-0.329	145	-15.22	1	0	0	0	413
ENSRNOT00000061242	LOC100912008	Coding	Click Me	1	-0.486	150	-18.37	1	0	0	0	50
ENSRNOT00000006190	Ppp1cb	Coding	Click Me	1	-0.339	140	-12.87	1	0	0	0	1676
ENSRNOT00000033493	Mlh3	Coding	Click Me	1	-0.405	150	-16.98	1	0	0	0	1012
ENSRNOT00000012371	Smcp	Coding	Click Me	1	-0.378	143	-16.73	1	0	0	0	230
ENSRNOT00000002259	Kcnj15	Coding	Click Me	1	-0.333	145	-16.17	1	0	0	0	146
ENSRNOT00000006203	Fibin	Coding	Click Me	1	-0.41	145	-18.34	1	0	0	0	1260
ENSRNOT00000009555	Sardh	Coding	Click Me	1	-0.352	145	-14.42	1	0	0	0	1206
ENSRNOT00000086710	Nlrp3	Coding	Click Me	1	-0.356	145	-13.78	1	0	0	0	288
ENSRNOT00000002621	Tecrl	Coding	Click Me	1	-0.4	142	-13.86	1	0	0	0	1888
ENSRNOT00000001570	Oasl	Coding	Click Me	1	-0.359	145	-19.38	1	0	0	0	464
ENSRNOT00000086888	Nvl	Coding	Click Me	1	-0.327	140	-12.87	1	0	0	0	973
ENSRNOT00000012473	Tacr3	Coding	Click Me	1	-0.327	145	-14.01	1	0	0	0	571
ENSRNOT00000064507	Lhx2	Coding	Click Me	1	-0.472	147	-14.13	1	0	0	0	620
ENSRNOT00000015185	Pcsk1	Coding	Click Me	1	-0.339	152	-15.42	1	0	0	0	2565
ENSRNOT00000012960	Serpina12	Coding	Click Me	1	-0.367	140	-18.47	1	0	0	0	276
ENSRNOT00000015579	Cnn3	Coding	Click Me	1	-0.355	145	-17.82	1	0	0	0	713
ENSRNOT00000090004	Adamts14	Coding	Click Me	1	-0.321	140	-15.92	1	0	0	0	1302
ENSRNOT00000004717	Slc6a4	Coding	Click Me	1	-0.352	147	-19.4	1	0	0	0	652
ENSRNOT00000071388	Steap3	Coding	Click Me	1	-0.366	143	-13.86	1	0	0	0	1303
ENSRNOT00000036793	AABR07073134.1	Coding	Click Me	1	-0.354	140	-14.24	1	0	0	0	192
ENSRNOT00000003070	Nup54	Coding	Click Me	1	-0.47	146	-13.86	1	0	0	0	590
ENSRNOT00000085927	Rdh11	Coding	Click Me	1	-0.321	149	-16.2	1	0	0	0	590
ENSRNOT00000089155	Ppp1r8	Coding	Click Me	1	-0.335	141	-14.94	1	0	0	0	1437
ENSRNOT00000034877	AABR07026957.1	Coding	Click Me	1	-0.36	140	-16.79	1	0	0	0	50
ENSRNOT00000083050	AABR07002784.1	Coding	Click Me	1	-0.318	152	-17.02	1	0	0	0	1420
ENSRNOT00000026631	Rsbn1	Coding	Click Me	1	-0.388	142	-18.63	1	0	0	0	4013
ENSRNOT00000028102	Tkfc	Coding	Click Me	1	-0.313	142	-14.44	1	0	0	0	350
ENSRNOT00000071928	Pet100	Coding	Click Me	1	-0.373	142	-14.67	1	0	0	0	936
ENSRNOT00000027353	Pigq	Coding	Click Me	1	-0.374	143	-17.73	1	0	0	0	1206
ENSRNOT00000029193	LOC691215	Coding	Click Me	1	-0.386	145	-16.23	1	0	0	0	576
ENSRNOT00000018082	Tepp	Coding	Click Me	1	-0.336	140	-15.94	1	0	0	0	137
ENSRNOT00000004599	Fmo4	Coding	Click Me	1	-0.459	150	-17.8	1	0	0	0	331
NM_001110860	Crem	Coding	Click Me	1	-0.432	142	-12.87	1	0	0	0	2978
ENSRNOT00000089984	Esr1	Coding	Click Me	1	-0.426	146	-17.34	1	0	0	0	649
ENSRNOT00000065458	Dcun1d4	Coding	Click Me	1	-0.33	150	-17.39	1	0	0	0	3178
ENSRNOT00000072820	Vom2r64	Coding	Click Me	1	-0.414	141	-19.66	1	0	0	0	50
ENSRNOT00000003479	Nubp1	Coding	Click Me	1	-0.343	146	-19.94	1	0	0	0	231
ENSRNOT00000079882	Inpp5e	Coding	Click Me	1	-0.372	142	-24.63	1	0	0	0	802
NM_175755	Ppm1f	Coding	Click Me	1	-0.316	145	-21.73	1	0	0	0	489
ENSRNOT00000074570	Pfn4	Coding	Click Me	1	-0.33	142	-15.71	1	0	0	0	580
ENSRNOT00000031035	Hoxb7	Coding	Click Me	1	-0.353	146	-15.08	1	0	0	0	526
ENSRNOT00000050820	Rnase2	Coding	Click Me	1	-0.382	140	-16.41	1	0	0	0	121
ENSRNOT00000074649	Ube2h	Coding	Click Me	1	-0.417	150	-15.82	1	0	0	0	3668
ENSRNOT00000074372	Ptchd3	Coding	Click Me	1	-0.442	147	-12.87	1	0	0	0	412
ENSRNOT00000023178	Mmachc	Coding	Click Me	1	-0.347	142	-15.56	1	0	0	0	877
ENSRNOT00000024137	Drd4	Coding	Click Me	1	-0.397	145	-17.15	1	0	0	0	119
ENSRNOT00000042215	Vom2r62	Coding	Click Me	1	-0.41	141	-19.66	1	0	0	0	50
ENSRNOT00000020806	Paxx	Coding	Click Me	1	-0.33	144	-13.97	1	0	0	0	209
ENSRNOT00000056862	Sema4a	Coding	Click Me	1	-0.39	142	-18.2	1	0	0	0	641
ENSRNOT00000002052	Rab4b	Coding	Click Me	1	-0.315	149	-21.77	1	0	0	0	399
ENSRNOT00000091211	Osbpl6	Coding	Click Me	1	-0.376	148	-16.12	1	0	0	0	4564
NM_022177	Cxcl12	Coding	Click Me	1	-0.35	142	-13.61	1	0	0	0	1494
ENSRNOT00000035541	Kif24	Coding	Click Me	1	-0.325	142	-13.69	1	0	0	0	196
ENSRNOT00000012635	Prpf38a	Coding	Click Me	1	-0.303	140	-14.31	1	0	0	0	512
ENSRNOT00000010852	Htra3	Coding	Click Me	1	-0.319	148	-21.84	1	0	0	0	891
ENSRNOT00000016262	Slc39a10	Coding	Click Me	1	-0.355	144	-16.83	1	0	0	0	2473
NM_001013905	Dpcd	Coding	Click Me	2	-0.769	293	-30.76	2	0	0	0	858
ENSRNOT00000077362	Ilf2	Coding	Click Me	1	-0.397	147	-13.86	1	0	0	0	298
ENSRNOT00000007773	Them6	Coding	Click Me	1	-0.304	147	-14.69	1	0	0	0	825
NM_031083	Pi4kb	Coding	Click Me	1	-0.374	140	-14.82	1	0	0	0	388
ENSRNOT00000064535	Eif4g2	Coding	Click Me	1	-0.411	140	-14.27	1	0	0	0	1963
ENSRNOT00000016056	Abhd14a	Coding	Click Me	1	-0.375	147	-13.86	1	0	0	0	161
ENSRNOT00000041163	Entpd5	Coding	Click Me	1	-0.323	144	-14.72	1	0	0	0	3538
ENSRNOT00000027875	Kcnq1	Coding	Click Me	1	-0.304	142	-15.49	1	0	0	0	935
NM_013145	Gnai1	Coding	Click Me	1	-0.375	148	-18.83	1	0	0	0	662
NM_001013034	Uchl5	Coding	Click Me	1	-0.361	145	-16	1	0	0	0	799
ENSRNOT00000085483	Irf5	Coding	Click Me	1	-0.37	141	-15.19	1	0	0	0	178
ENSRNOT00000025718	Notch2	Coding	Click Me	1	-0.333	142	-21.06	1	0	0	0	2954
ENSRNOT00000024232	Abcb10	Coding	Click Me	1	-0.321	149	-16.02	1	0	0	0	1212
ENSRNOT00000059588	Lypd6	Coding	Click Me	1	-0.308	142	-15.43	1	0	0	0	2923
ENSRNOT00000035558	Pigc	Coding	Click Me	1	-0.439	146	-15.06	1	0	0	0	273
ENSRNOT00000020529	Phc1	Coding	Click Me	1	-0.367	142	-13.09	1	0	0	0	735
ENSRNOT00000020109	Ftmt	Coding	Click Me	1	-0.389	145	-20.4	1	0	0	0	454
ENSRNOT00000024835	Fam83f	Coding	Click Me	1	-0.322	145	-18.11	1	0	0	0	1509
ENSRNOT00000083632	Irf2	Coding	Click Me	1	-0.349	142	-15.05	1	0	0	0	1624
ENSRNOT00000090198	Smad4	Coding	Click Me	1	-0.369	144	-16.39	1	0	0	0	124
ENSRNOT00000073811	Ankrd29	Coding	Click Me	1	-0.357	149	-18.15	1	0	0	0	2160

## Sheet: AS-tDR-004117
Predicted target genes for AS-tDR-004117
# Column A: Seqname, the name the sequence.
# Column B: GeneSymbol, the official gene symbol of the sequence.
# Column C: Type, the type of the transcipt.
# Column D: Diagrams, the diagrams illustrate key features for miRNA binding. See Ref [1,2] for details.
# Column E: Total, the total number of the binding sites on the targets.
# Column F: Context+, the sum of the context+ scores used in TargetScan after version 6.0. More negative is better. See Ref [3] for details.
# Column G: Structure, the sum of the structure scores used in miRanda (Ref [4]). The higher the better.
# Column H: Energy, the sum of the free energy predicted by miRanda (Ref [4]). More negative is better.
# Column I ~ Column L: Counting numbers for different seed match types
# Reference:
[1] Grimson A., et al. MicroRNA Targeting Specificity in Mammals: Determinants beyond Seed Pairing. Molecular Cell, Volume 27, Issue 1, 91-105, 6 July 2007.
[2] Amy E. Pasquinelli. MicroRNAs and their targets: recognition, regulation and an emerging reciprocal relationship. Nature Reviews Genetics, Volume 13, 271-282, 1 April 2012.
[3] David M Garcia., et al. Weak Seed-Pairing Stability and High Target-Site Abundance Decrease the Proficiency of lsy-6 and Other miRNAs. Nat. Struct. Mol. Biol., Volume 18, 1139-1146, 2011.
[4] Enright AJ., el al. miRanda algorithm: MicroRNA targets in Drosophila. Genome Biology, Volume 5, R1, 2003.
Target genes for AS-tDR-004117
Target			Sites		TargetScan	miranda		Seed match types				Annotations
Seqname	GeneSymbol	Type	Diagrams	Total	Context+	Structure	Energy	8mer-1a	7mer-m8	7mer-1a	Imperfect	UTR Length
ENSRNOT00000073771	Impact	Coding	Click Me	1	-0.302	150	-20.56	0	1	0	0	2352
ENSRNOT00000000687	Pcbd1	Coding	Click Me	1	-0.358	146	-18.35	0	1	0	0	432
ENSRNOT00000084076	Lig3	Coding	Click Me	1	-0.568	145	-18.11	1	0	0	0	1338
ENSRNOT00000021898	Nkd2	Coding	Click Me	1	-0.318	142	-15.88	1	0	0	0	2451
ENSRNOT00000082040	Hecw1	Coding	Click Me	1	-0.621	145	-15.93	1	0	0	0	156
ENSRNOT00000081246	Slc12a3	Coding	Click Me	1	-0.325	144	-16.69	0	1	0	0	1348
ENSRNOT00000090083	Mypn	Coding	Click Me	1	-0.337	150	-17.57	0	1	0	0	1058
ENSRNOT00000013490	Snapc5	Coding	Click Me	1	-0.6	146	-17	1	0	0	0	870
ENSRNOT00000036447	RGD1311343	Coding	Click Me	1	-0.324	147	-16.16	0	1	0	0	1405
ENSRNOT00000022914	Pxmp4	Coding	Click Me	1	-0.584	143	-15.17	1	0	0	0	686
NM_001243534	Bles03	Coding	Click Me	1	-0.483	141	-16.72	1	0	0	0	973
ENSRNOT00000026525	Eaf1	Coding	Click Me	1	-0.426	147	-21.81	1	0	0	0	3144
NM_001014141	Tmem192	Coding	Click Me	1	-0.335	150	-19.44	0	1	0	0	208
ENSRNOT00000024069	Irf8	Coding	Click Me	1	-0.32	149	-16.89	0	1	0	0	1532
ENSRNOT00000015678	C1rl	Coding	Click Me	1	-0.342	140	-16.53	0	1	0	0	754
ENSRNOT00000059459	Dctd	Coding	Click Me	1	-0.321	148	-19.86	0	1	0	0	1177
ENSRNOT00000020452	Mcoln2	Coding	Click Me	1	-0.595	144	-16.57	1	0	0	0	826
NM_013044	Tmod1	Coding	Click Me	1	-0.561	157	-24.41	1	0	0	0	1419
ENSRNOT00000056192	Lyrm9	Coding	Click Me	1	-0.421	140	-14.07	1	0	0	0	1272
ENSRNOT00000017613	Ankrd12	Coding	Click Me	1	-0.319	145	-17.49	0	1	0	0	3552
ENSRNOT00000034769	Ppp1r1c	Coding	Click Me	1	-0.35	149	-17.22	0	1	0	0	2120
ENSRNOT00000020267	Dbt	Coding	Click Me	1	-0.412	157	-21.64	1	0	0	0	1681
ENSRNOT00000059280	Acvr1c	Coding	Click Me	1	-0.319	140	-12.2	0	1	0	0	2472
ENSRNOT00000059571	Npas2	Coding	Click Me	1	-0.473	148	-17.78	1	0	0	0	1271
ENSRNOT00000045224	Dtna	Coding	Click Me	1	-0.355	150	-15.8	0	1	0	0	2403
ENSRNOT00000044775	Abo	Coding	Click Me	1	-0.311	140	-14.94	0	1	0	0	557
ENSRNOT00000089193	Ndufa9	Coding	Click Me	1	-0.344	142	-15.56	0	1	0	0	88
ENSRNOT00000015638	Phf3	Coding	Click Me	1	-0.472	140	-20.24	1	0	0	0	1451
NM_001007694	Ifit3	Coding	Click Me	1	-0.357	154	-19.3	0	1	0	0	639
ENSRNOT00000003615	Emp2	Coding	Click Me	1	-0.309	141	-12.66	0	1	0	0	2446
ENSRNOT00000031025	Ifit3	Coding	Click Me	1	-0.354	154	-19.3	0	1	0	0	655
ENSRNOT00000082550	Itprip	Coding	Click Me	1	-0.3	152	-18.58	0	1	0	0	195
ENSRNOT00000042181	Tmem192	Coding	Click Me	1	-0.327	150	-19.44	0	1	0	0	1132
ENSRNOT00000035875	Ahctf1	Coding	Click Me	1	-0.548	145	-15.45	1	0	0	0	1434
ENSRNOT00000026710	Gnai3	Coding	Click Me	1	-0.351	143	-16.47	1	0	0	0	2041
ENSRNOT00000078034	Ahctf1	Coding	Click Me	1	-0.523	145	-15.45	1	0	0	0	1532
ENSRNOT00000092741	Klc1	Coding	Click Me	1	-0.409	140	-14.7	0	1	0	0	397
ENSRNOT00000082566	Ddx19a	Coding	Click Me	1	-0.341	148	-17.78	1	0	0	0	4440
ENSRNOT00000087852	Prelid2	Coding	Click Me	1	-0.55	143	-14.72	1	0	0	0	4013
ENSRNOT00000012424	Klf12	Coding	Click Me	1	-0.358	140	-12.15	0	1	0	0	1194
ENSRNOT00000028038	Shc1	Coding	Click Me	1	-0.303	141	-17.37	0	1	0	0	1590
NM_019345	Slc12a3	Coding	Click Me	1	-0.325	144	-16.69	0	1	0	0	1327
ENSRNOT00000005423	Ccdc42	Coding	Click Me	1	-0.326	144	-17.15	0	1	0	0	2130
ENSRNOT00000011994	Kcnd1	Coding	Click Me	1	-0.444	140	-15.09	1	0	0	0	1756
ENSRNOT00000045001	AABR07040095.1	Coding	Click Me	1	-0.384	143	-13.61	0	1	0	0	2699
ENSRNOT00000091662	Tigar	Coding	Click Me	1	-0.65	144	-16.74	1	0	0	0	1851
ENSRNOT00000057872	Mypn	Coding	Click Me	1	-0.343	150	-17.57	0	1	0	0	1017
ENSRNOT00000075570	Itprip	Coding	Click Me	1	-0.3	152	-18.58	0	1	0	0	2130
ENSRNOT00000017670	Dctd	Coding	Click Me	1	-0.312	148	-19.86	0	1	0	0	1244
ENSRNOT00000077689	Spsb3	Coding	Click Me	1	-0.303	151	-17.34	0	1	0	0	195
ENSRNOT00000033312	Esco1	Coding	Click Me	1	-0.537	147	-14.36	1	0	0	0	889
ENSRNOT00000020672	Mak	Coding	Click Me	1	-0.61	143	-16.76	1	0	0	0	962
ENSRNOT00000009096	Rdh10	Coding	Click Me	1	-0.392	143	-14.83	1	0	0	0	1778
ENSRNOT00000056652	Shc1	Coding	Click Me	1	-0.303	141	-17.37	0	1	0	0	1590
ENSRNOT00000065529	Clmn	Coding	Click Me	1	-0.355	141	-13.16	0	1	0	0	1597
ENSRNOT00000018009	Prkcsh	Coding	Click Me	1	-0.522	144	-14.43	1	0	0	0	311
ENSRNOT00000006355	Arf6	Coding	Click Me	1	-0.353	153	-17.96	0	1	0	0	464
ENSRNOT00000017337	Ptk6	Coding	Click Me	1	-0.557	142	-14.76	1	0	0	0	492
ENSRNOT00000046775	Tet2	Coding	Click Me	1	-0.589	150	-20.19	1	0	0	0	1590
NM_001107778	Hspa12b	Coding	Click Me	1	-0.328	144	-15.89	0	1	0	0	2123
ENSRNOT00000013228	Tmod1	Coding	Click Me	1	-0.562	157	-24.41	1	0	0	0	1415
ENSRNOT00000012691	Lce1m	Coding	Click Me	1	-0.352	140	-16.78	0	1	0	0	261
ENSRNOT00000079462	Crebrf	Coding	Click Me	1	-0.345	145	-17.79	0	1	0	0	4296
ENSRNOT00000066149	Pheta2	Coding	Click Me	1	-0.424	143	-15.95	1	0	0	0	1440
NM_001014054	Tmem168	Coding	Click Me	1	-0.586	147	-17.26	1	0	0	0	1480
ENSRNOT00000006805	Bcorl1	Coding	Click Me	1	-0.621	145	-19.17	1	0	0	0	1433
ENSRNOT00000085565	RGD1559714	Coding	Click Me	1	-0.337	145	-17.44	0	1	0	0	687
ENSRNOT00000045393	Plcb4	Coding	Click Me	1	-0.385	140	-15.79	0	1	0	0	1509
ENSRNOT00000065644	Camk2g	Coding	Click Me	1	-0.345	145	-17.26	1	0	0	0	4311
ENSRNOT00000076739	Lig3	Coding	Click Me	1	-0.568	145	-18.11	1	0	0	0	2621
ENSRNOT00000010264	Vps54	Coding	Click Me	1	-0.35	149	-14.53	0	1	0	0	1194
ENSRNOT00000037712	Abcb1a	Coding	Click Me	1	-0.365	142	-14.83	0	1	0	0	1324
ENSRNOT00000009637	Slc25a14	Coding	Click Me	1	-0.325	141	-13.01	0	1	0	0	378

## Sheet: AS-tDR-004118
Predicted target genes for AS-tDR-004118
# Column A: Seqname, the name the sequence.
# Column B: GeneSymbol, the official gene symbol of the sequence.
# Column C: Type, the type of the transcipt.
# Column D: Diagrams, the diagrams illustrate key features for miRNA binding. See Ref [1,2] for details.
# Column E: Total, the total number of the binding sites on the targets.
# Column F: Context+, the sum of the context+ scores used in TargetScan after version 6.0. More negative is better. See Ref [3] for details.
# Column G: Structure, the sum of the structure scores used in miRanda (Ref [4]). The higher the better.
# Column H: Energy, the sum of the free energy predicted by miRanda (Ref [4]). More negative is better.
# Column I ~ Column L: Counting numbers for different seed match types
# Reference:
[1] Grimson A., et al. MicroRNA Targeting Specificity in Mammals: Determinants beyond Seed Pairing. Molecular Cell, Volume 27, Issue 1, 91-105, 6 July 2007.
[2] Amy E. Pasquinelli. MicroRNAs and their targets: recognition, regulation and an emerging reciprocal relationship. Nature Reviews Genetics, Volume 13, 271-282, 1 April 2012.
[3] David M Garcia., et al. Weak Seed-Pairing Stability and High Target-Site Abundance Decrease the Proficiency of lsy-6 and Other miRNAs. Nat. Struct. Mol. Biol., Volume 18, 1139-1146, 2011.
[4] Enright AJ., el al. miRanda algorithm: MicroRNA targets in Drosophila. Genome Biology, Volume 5, R1, 2003.
Target genes for AS-tDR-004118
Target			Sites		TargetScan	miranda		Seed match types				Annotations
Seqname	GeneSymbol	Type	Diagrams	Total	Context+	Structure	Energy	8mer-1a	7mer-m8	7mer-1a	Imperfect	UTR Length
ENSRNOT00000073771	Impact	Coding	Click Me	1	-0.302	155	-20.56	0	1	0	0	2352
ENSRNOT00000000687	Pcbd1	Coding	Click Me	1	-0.358	151	-18.35	0	1	0	0	432
ENSRNOT00000084076	Lig3	Coding	Click Me	1	-0.568	145	-18.11	1	0	0	0	1338
ENSRNOT00000021898	Nkd2	Coding	Click Me	1	-0.318	142	-15.88	1	0	0	0	2451
ENSRNOT00000082040	Hecw1	Coding	Click Me	1	-0.621	147	-15.93	1	0	0	0	156
ENSRNOT00000081246	Slc12a3	Coding	Click Me	1	-0.325	144	-19.32	0	1	0	0	1348
ENSRNOT00000090083	Mypn	Coding	Click Me	1	-0.337	151	-17.57	0	1	0	0	1058
ENSRNOT00000013490	Snapc5	Coding	Click Me	1	-0.6	146	-17	1	0	0	0	870
ENSRNOT00000036447	RGD1311343	Coding	Click Me	1	-0.324	147	-16.16	0	1	0	0	1405
ENSRNOT00000022914	Pxmp4	Coding	Click Me	1	-0.594	143	-15.17	1	0	0	0	686
NM_001243534	Bles03	Coding	Click Me	1	-0.483	142	-16.72	1	0	0	0	973
ENSRNOT00000026525	Eaf1	Coding	Click Me	1	-0.426	152	-21.81	1	0	0	0	3144
NM_001014141	Tmem192	Coding	Click Me	1	-0.335	150	-19.68	0	1	0	0	208
ENSRNOT00000024069	Irf8	Coding	Click Me	1	-0.32	151	-16.89	0	1	0	0	1532
ENSRNOT00000015678	C1rl	Coding	Click Me	1	-0.342	141	-16.77	0	1	0	0	754
ENSRNOT00000059459	Dctd	Coding	Click Me	1	-0.321	153	-19.86	0	1	0	0	1177
ENSRNOT00000020452	Mcoln2	Coding	Click Me	1	-0.595	144	-16.57	1	0	0	0	826
NM_013044	Tmod1	Coding	Click Me	1	-0.561	157	-24.41	1	0	0	0	1419
ENSRNOT00000056192	Lyrm9	Coding	Click Me	1	-0.421	140	-14.07	1	0	0	0	1272
ENSRNOT00000017613	Ankrd12	Coding	Click Me	1	-0.319	145	-17.49	0	1	0	0	3552
ENSRNOT00000034769	Ppp1r1c	Coding	Click Me	1	-0.35	151	-17.22	0	1	0	0	2120
ENSRNOT00000020267	Dbt	Coding	Click Me	1	-0.412	157	-21.64	1	0	0	0	1681
ENSRNOT00000059280	Acvr1c	Coding	Click Me	1	-0.319	140	-12.2	0	1	0	0	2472
ENSRNOT00000059571	Npas2	Coding	Click Me	1	-0.473	148	-17.78	1	0	0	0	1271
ENSRNOT00000045224	Dtna	Coding	Click Me	1	-0.355	150	-16.04	0	1	0	0	2403
ENSRNOT00000044775	Abo	Coding	Click Me	1	-0.311	140	-14.94	0	1	0	0	557
ENSRNOT00000089193	Ndufa9	Coding	Click Me	1	-0.344	142	-15.56	0	1	0	0	88
ENSRNOT00000015638	Phf3	Coding	Click Me	1	-0.472	145	-20.24	1	0	0	0	1451
NM_001007694	Ifit3	Coding	Click Me	1	-0.357	159	-19.3	0	1	0	0	639
ENSRNOT00000003615	Emp2	Coding	Click Me	1	-0.309	141	-12.88	0	1	0	0	2446
ENSRNOT00000031025	Ifit3	Coding	Click Me	1	-0.354	159	-19.3	0	1	0	0	655
ENSRNOT00000082550	Itprip	Coding	Click Me	1	-0.3	154	-19.63	0	1	0	0	195
ENSRNOT00000042181	Tmem192	Coding	Click Me	1	-0.327	150	-19.68	0	1	0	0	1132
ENSRNOT00000035875	Ahctf1	Coding	Click Me	1	-0.559	145	-17.44	1	0	0	0	1434
ENSRNOT00000026710	Gnai3	Coding	Click Me	1	-0.351	144	-17.65	1	0	0	0	2041
ENSRNOT00000078034	Ahctf1	Coding	Click Me	1	-0.534	145	-17.44	1	0	0	0	1532
ENSRNOT00000092741	Klc1	Coding	Click Me	1	-0.409	140	-15.49	0	1	0	0	397
ENSRNOT00000082566	Ddx19a	Coding	Click Me	1	-0.341	148	-17.78	1	0	0	0	4440
ENSRNOT00000087852	Prelid2	Coding	Click Me	1	-0.55	145	-14.72	1	0	0	0	4013
ENSRNOT00000012424	Klf12	Coding	Click Me	1	-0.358	140	-13.03	0	1	0	0	1194
ENSRNOT00000028038	Shc1	Coding	Click Me	1	-0.303	141	-17.37	0	1	0	0	1590
NM_019345	Slc12a3	Coding	Click Me	1	-0.325	144	-19.32	0	1	0	0	1327
ENSRNOT00000005423	Ccdc42	Coding	Click Me	1	-0.326	149	-18.2	0	1	0	0	2130
ENSRNOT00000011994	Kcnd1	Coding	Click Me	1	-0.444	140	-15.09	1	0	0	0	1756
ENSRNOT00000045001	AABR07040095.1	Coding	Click Me	1	-0.393	143	-13.61	0	1	0	0	2699
ENSRNOT00000091662	Tigar	Coding	Click Me	1	-0.65	144	-16.74	1	0	0	0	1851
ENSRNOT00000057872	Mypn	Coding	Click Me	1	-0.343	151	-17.57	0	1	0	0	1017
ENSRNOT00000075570	Itprip	Coding	Click Me	1	-0.3	154	-19.63	0	1	0	0	2130
ENSRNOT00000017670	Dctd	Coding	Click Me	1	-0.312	153	-19.86	0	1	0	0	1244
ENSRNOT00000077689	Spsb3	Coding	Click Me	1	-0.303	151	-17.34	0	1	0	0	195
ENSRNOT00000033312	Esco1	Coding	Click Me	1	-0.537	147	-14.36	1	0	0	0	889
ENSRNOT00000020672	Mak	Coding	Click Me	1	-0.621	143	-19.97	1	0	0	0	962
ENSRNOT00000009096	Rdh10	Coding	Click Me	1	-0.392	143	-14.83	1	0	0	0	1778
ENSRNOT00000056652	Shc1	Coding	Click Me	1	-0.303	141	-17.37	0	1	0	0	1590
ENSRNOT00000065529	Clmn	Coding	Click Me	1	-0.364	141	-16.37	0	1	0	0	1597
ENSRNOT00000018009	Prkcsh	Coding	Click Me	1	-0.522	144	-14.43	1	0	0	0	311
ENSRNOT00000006355	Arf6	Coding	Click Me	1	-0.353	153	-18.97	0	1	0	0	464
ENSRNOT00000017337	Ptk6	Coding	Click Me	1	-0.557	143	-15.63	1	0	0	0	492
ENSRNOT00000046775	Tet2	Coding	Click Me	1	-0.589	155	-20.19	1	0	0	0	1590
NM_001107778	Hspa12b	Coding	Click Me	1	-0.328	145	-16.24	0	1	0	0	2123
ENSRNOT00000013228	Tmod1	Coding	Click Me	1	-0.562	157	-24.41	1	0	0	0	1415
ENSRNOT00000012691	Lce1m	Coding	Click Me	1	-0.352	143	-16.78	0	1	0	0	261
ENSRNOT00000079462	Crebrf	Coding	Click Me	1	-0.345	150	-17.79	0	1	0	0	4296
ENSRNOT00000066149	Pheta2	Coding	Click Me	1	-0.424	143	-15.95	1	0	0	0	1440
NM_001014054	Tmem168	Coding	Click Me	1	-0.586	147	-17.26	1	0	0	0	1480
ENSRNOT00000006805	Bcorl1	Coding	Click Me	1	-0.621	150	-19.52	1	0	0	0	1433
ENSRNOT00000085565	RGD1559714	Coding	Click Me	1	-0.346	145	-17.44	0	1	0	0	687
ENSRNOT00000045393	Plcb4	Coding	Click Me	1	-0.385	142	-18	0	1	0	0	1509
ENSRNOT00000065644	Camk2g	Coding	Click Me	1	-0.345	145	-17.26	1	0	0	0	4311
ENSRNOT00000076739	Lig3	Coding	Click Me	1	-0.568	145	-18.11	1	0	0	0	2621
ENSRNOT00000010264	Vps54	Coding	Click Me	1	-0.35	149	-14.75	0	1	0	0	1194
ENSRNOT00000037712	Abcb1a	Coding	Click Me	1	-0.365	146	-20.36	0	1	0	0	1324
ENSRNOT00000009637	Slc25a14	Coding	Click Me	1	-0.325	141	-13.92	0	1	0	0	378

## Sheet: AS-tDR-006440
Predicted target genes for AS-tDR-006440
# Column A: Seqname, the name the sequence.
# Column B: GeneSymbol, the official gene symbol of the sequence.
# Column C: Type, the type of the transcipt.
# Column D: Diagrams, the diagrams illustrate key features for miRNA binding. See Ref [1,2] for details.
# Column E: Total, the total number of the binding sites on the targets.
# Column F: Context+, the sum of the context+ scores used in TargetScan after version 6.0. More negative is better. See Ref [3] for details.
# Column G: Structure, the sum of the structure scores used in miRanda (Ref [4]). The higher the better.
# Column H: Energy, the sum of the free energy predicted by miRanda (Ref [4]). More negative is better.
# Column I ~ Column L: Counting numbers for different seed match types
# Reference:
[1] Grimson A., et al. MicroRNA Targeting Specificity in Mammals: Determinants beyond Seed Pairing. Molecular Cell, Volume 27, Issue 1, 91-105, 6 July 2007.
[2] Amy E. Pasquinelli. MicroRNAs and their targets: recognition, regulation and an emerging reciprocal relationship. Nature Reviews Genetics, Volume 13, 271-282, 1 April 2012.
[3] David M Garcia., et al. Weak Seed-Pairing Stability and High Target-Site Abundance Decrease the Proficiency of lsy-6 and Other miRNAs. Nat. Struct. Mol. Biol., Volume 18, 1139-1146, 2011.
[4] Enright AJ., el al. miRanda algorithm: MicroRNA targets in Drosophila. Genome Biology, Volume 5, R1, 2003.
Target genes for AS-tDR-006440
Target			Sites		TargetScan	miranda		Seed match types				Annotations
Seqname	GeneSymbol	Type	Diagrams	Total	Context+	Structure	Energy	8mer-1a	7mer-m8	7mer-1a	Imperfect	UTR Length
ENSRNOT00000022811	Zfp652	Coding	Click Me	1	-0.557	150	-19.83	1	0	0	0	673
ENSRNOT00000068190	Vrk2	Coding	Click Me	1	-0.552	145	-14.53	1	0	0	0	211
ENSRNOT00000003237	Prkg2	Coding	Click Me	1	-0.329	142	-12.79	1	0	0	0	2253
ENSRNOT00000036917	Cenpm	Coding	Click Me	1	-0.524	145	-14.53	1	0	0	0	609
ENSRNOT00000079030	Syt15	Coding	Click Me	1	-0.413	140	-12.79	1	0	0	0	2663
NM_001107330	Irx4	Coding	Click Me	1	-0.304	150	-19.44	0	1	0	0	572
ENSRNOT00000024719	Urod	Coding	Click Me	1	-0.317	149	-14.27	0	1	0	0	68
ENSRNOT00000016975	Irx4	Coding	Click Me	1	-0.304	150	-19.44	0	1	0	0	569
ENSRNOT00000009806	Cc2d1a	Coding	Click Me	1	-0.493	143	-16.62	1	0	0	0	196
ENSRNOT00000091994	Nf1x	Coding	Click Me	1	-0.47	140	-12.79	1	0	0	0	196
ENSRNOT00000019056	Noc3l	Coding	Click Me	1	-0.523	140	-14.92	1	0	0	0	434
ENSRNOT00000024968	Cidea	Coding	Click Me	1	-0.495	153	-21.33	1	0	0	0	50
ENSRNOT00000026783	Cavin1	Coding	Click Me	1	-0.415	141	-18.07	1	0	0	0	1885
ENSRNOT00000077440	Tmem65	Coding	Click Me	1	-0.527	148	-14.53	1	0	0	0	1306
ENSRNOT00000076192	Hnf1b	Coding	Click Me	1	-0.434	145	-13.83	1	0	0	0	913
NM_001190475	Adgrl2	Coding	Click Me	1	-0.39	140	-17.48	1	0	0	0	1340
ENSRNOT00000064203	Tlk1	Coding	Click Me	1	-0.559	141	-14.92	1	0	0	0	2053
ENSRNOT00000014666	Matn1	Coding	Click Me	1	-0.549	142	-12.79	1	0	0	0	365
ENSRNOT00000033795	Ms4a6a	Coding	Click Me	1	-0.503	141	-15.9	1	0	0	0	1584
ENSRNOT00000052075	Mettl7a	Coding	Click Me	1	-0.527	142	-12.79	1	0	0	0	1007
ENSRNOT00000023724	Gabarap	Coding	Click Me	1	-0.319	145	-24.38	0	1	0	0	416
ENSRNOT00000089936	Aurkaip1	Coding	Click Me	1	-0.475	147	-17.95	1	0	0	0	442
ENSRNOT00000090122	Gys2	Coding	Click Me	1	-0.302	140	-13.69	0	1	0	0	230
ENSRNOT00000068134	Anxa3	Coding	Click Me	1	-0.312	141	-13.78	1	0	0	0	2271
ENSRNOT00000084017	Fam120b	Coding	Click Me	1	-0.309	153	-17.99	0	1	0	0	2084
ENSRNOT00000042256	Adgrl2	Coding	Click Me	1	-0.391	140	-17.48	1	0	0	0	1336
ENSRNOT00000007407	LOC686013	Coding	Click Me	1	-0.504	141	-14.92	1	0	0	0	186
ENSRNOT00000085010	Tmc4	Coding	Click Me	1	-0.453	142	-13.77	1	0	0	0	193
ENSRNOT00000087044	LOC500584	Coding	Click Me	1	-0.325	140	-18.36	0	1	0	0	1426
ENSRNOT00000045180	Cc2d1a	Coding	Click Me	1	-0.493	143	-16.62	1	0	0	0	377
ENSRNOT00000020528	Ctgf	Coding	Click Me	1	-0.488	140	-12.79	1	0	0	0	1062
ENSRNOT00000001718	Tmem184a	Coding	Click Me	1	-0.442	140	-16.16	1	0	0	0	539
ENSRNOT00000014163	Ccr7	Coding	Click Me	1	-0.493	147	-14.53	1	0	0	0	196
ENSRNOT00000085619	Mreg	Coding	Click Me	1	-0.304	144	-12.79	1	0	0	0	1701
ENSRNOT00000009825	B3gat1	Coding	Click Me	1	-0.467	140	-14.76	1	0	0	0	2293
ENSRNOT00000018556	Pde7b	Coding	Click Me	1	-0.479	140	-12.79	1	0	0	0	314
ENSRNOT00000031384	Aldh5a1	Coding	Click Me	1	-0.383	142	-13.78	1	0	0	0	3844
ENSRNOT00000064064	Asgr2	Coding	Click Me	1	-0.357	141	-17.73	0	1	0	0	552
ENSRNOT00000063866	Prpf3	Coding	Click Me	1	-0.318	147	-20.98	0	1	0	0	256
ENSRNOT00000045905	Adgrl2	Coding	Click Me	1	-0.391	140	-17.48	1	0	0	0	1336
ENSRNOT00000040865	Mprip	Coding	Click Me	1	-0.471	141	-16.22	1	0	0	0	721
ENSRNOT00000022824	Chka	Coding	Click Me	1	-0.588	144	-13.78	1	0	0	0	961
ENSRNOT00000057386	Col4a1	Coding	Click Me	1	-0.362	142	-15.1	1	0	0	0	1364
ENSRNOT00000002155	Hoxd13	Coding	Click Me	1	-0.33	146	-19.03	0	1	0	0	1461
ENSRNOT00000084928	Usp25	Coding	Click Me	1	-0.377	148	-14.19	0	1	0	0	1199
ENSRNOT00000002150	Usp25	Coding	Click Me	1	-0.378	148	-14.19	0	1	0	0	1191
ENSRNOT00000022341	Ninj1	Coding	Click Me	1	-0.494	155	-21.01	1	0	0	0	653
ENSRNOT00000016499	S100a16	Coding	Click Me	1	-0.575	150	-14.85	1	0	0	0	567
ENSRNOT00000002158	Map3k7cl	Coding	Click Me	1	-0.451	144	-14.86	1	0	0	0	939
NM_001012095	Rnf32	Coding	Click Me	1	-0.467	140	-13.77	1	0	0	0	841
ENSRNOT00000011556	Wdr5	Coding	Click Me	1	-0.3	142	-18.37	0	1	0	0	1632
ENSRNOT00000078586	Pde7b	Coding	Click Me	1	-0.479	140	-12.79	1	0	0	0	314
ENSRNOT00000071392	Cabyr	Coding	Click Me	1	-0.464	141	-13.41	1	0	0	0	790
ENSRNOT00000089329	Tubgcp3	Coding	Click Me	1	-0.3	140	-18.37	0	1	0	0	861
ENSRNOT00000089196	Ctgf	Coding	Click Me	1	-0.347	140	-12.79	1	0	0	0	1621
ENSRNOT00000012415	Prkar2b	Coding	Click Me	1	-0.325	145	-23.08	0	1	0	0	1905
ENSRNOT00000004357	Mprip	Coding	Click Me	1	-0.471	141	-16.22	1	0	0	0	721
ENSRNOT00000064982	Serinc4	Coding	Click Me	1	-0.445	140	-13.78	1	0	0	0	836
NM_001302208	Adgrl2	Coding	Click Me	1	-0.39	140	-17.48	1	0	0	0	1340
NM_001302209	Adgrl2	Coding	Click Me	1	-0.39	140	-17.48	1	0	0	0	1340
ENSRNOT00000080132	Hps5	Coding	Click Me	1	-0.303	141	-18.37	0	1	0	0	1211
ENSRNOT00000089107	Tcirg1	Coding	Click Me	1	-0.509	140	-13.78	1	0	0	0	669
ENSRNOT00000071166	Fut10	Coding	Click Me	1	-0.316	150	-22.68	0	1	0	0	2052
ENSRNOT00000060012	Nr2c2ap	Coding	Click Me	1	-0.319	153	-19.13	0	1	0	0	882
NM_134408	Adgrl2	Coding	Click Me	1	-0.39	140	-17.48	1	0	0	0	1340
ENSRNOT00000043602	Esr2	Coding	Click Me	1	-0.521	154	-19.41	1	0	0	0	445
ENSRNOT00000050597	Lepr	Coding	Click Me	1	-0.479	148	-18.32	1	0	0	0	538
ENSRNOT00000066953	Cyp2ab1	Coding	Click Me	1	-0.473	145	-14.53	1	0	0	0	771
ENSRNOT00000044541	Psma8	Coding	Click Me	1	-0.38	140	-19.45	0	1	0	0	1125
ENSRNOT00000018145	Mvd	Coding	Click Me	1	-0.425	142	-12.79	1	0	0	0	429
ENSRNOT00000090827	Gfpt1	Coding	Click Me	1	-0.444	140	-17.59	1	0	0	0	3945
NM_001302211	Adgrl2	Coding	Click Me	1	-0.39	140	-17.48	1	0	0	0	1340
NM_001302210	Adgrl2	Coding	Click Me	1	-0.39	140	-17.48	1	0	0	0	1340
NM_001107466	Fam120b	Coding	Click Me	1	-0.308	153	-17.99	0	1	0	0	2088
ENSRNOT00000028615	Grin2d	Coding	Click Me	1	-0.306	140	-19.66	0	1	0	0	535
ENSRNOT00000029679	Atp6v1g3	Coding	Click Me	1	-0.563	145	-14.53	1	0	0	0	1331
ENSRNOT00000085997	Thyn1	Coding	Click Me	1	-0.306	145	-22.08	0	1	0	0	195
ENSRNOT00000076073	AABR07006860.1	Coding	Click Me	1	-0.467	140	-16.33	1	0	0	0	2457
ENSRNOT00000079719	Prkar2b	Coding	Click Me	1	-0.325	145	-23.08	0	1	0	0	324
ENSRNOT00000084580	Map3k7cl	Coding	Click Me	1	-0.451	144	-14.86	1	0	0	0	946
ENSRNOT00000075819	Tma7	Coding	Click Me	1	-0.517	142	-13.77	1	0	0	0	262
NM_001013870	Trmt1	Coding	Click Me	1	-0.322	140	-18.42	0	1	0	0	1058
ENSRNOT00000007879	G0s2	Coding	Click Me	1	-0.495	157	-19.43	1	0	0	0	318
NM_001110099	Ret	Coding	Click Me	1	-0.509	144	-12.79	1	0	0	0	693
NM_001105898	Rbm11	Coding	Click Me	1	-0.497	140	-13.77	1	0	0	0	1997
ENSRNOT00000042682	Esr2	Coding	Click Me	1	-0.521	154	-19.41	1	0	0	0	678
NM_001308149	Hnf1b	Coding	Click Me	1	-0.434	145	-13.83	1	0	0	0	916
NM_001308148	Hnf1b	Coding	Click Me	1	-0.434	145	-13.83	1	0	0	0	916
ENSRNOT00000006578	Pa2g4	Coding	Click Me	1	-0.542	140	-13.78	1	0	0	0	265
NM_001309260	AC134204.1	Coding	Click Me	1	-0.346	142	-18.37	0	1	0	0	4045
ENSRNOT00000023623	Slc38a3	Coding	Click Me	1	-0.418	149	-12.79	1	0	0	0	775
ENSRNOT00000050734	Tor1aip2	Coding	Click Me	1	-0.441	140	-16.51	1	0	0	0	3131
ENSRNOT00000046598	Slco1a4	Coding	Click Me	1	-0.434	143	-13.77	1	0	0	0	1515

## Sheet: AS-tDR-013227
Predicted target genes for AS-tDR-013227
# Column A: Seqname, the name the sequence.
# Column B: GeneSymbol, the official gene symbol of the sequence.
# Column C: Type, the type of the transcipt.
# Column D: Diagrams, the diagrams illustrate key features for miRNA binding. See Ref [1,2] for details.
# Column E: Total, the total number of the binding sites on the targets.
# Column F: Context+, the sum of the context+ scores used in TargetScan after version 6.0. More negative is better. See Ref [3] for details.
# Column G: Structure, the sum of the structure scores used in miRanda (Ref [4]). The higher the better.
# Column H: Energy, the sum of the free energy predicted by miRanda (Ref [4]). More negative is better.
# Column I ~ Column L: Counting numbers for different seed match types
# Reference:
[1] Grimson A., et al. MicroRNA Targeting Specificity in Mammals: Determinants beyond Seed Pairing. Molecular Cell, Volume 27, Issue 1, 91-105, 6 July 2007.
[2] Amy E. Pasquinelli. MicroRNAs and their targets: recognition, regulation and an emerging reciprocal relationship. Nature Reviews Genetics, Volume 13, 271-282, 1 April 2012.
[3] David M Garcia., et al. Weak Seed-Pairing Stability and High Target-Site Abundance Decrease the Proficiency of lsy-6 and Other miRNAs. Nat. Struct. Mol. Biol., Volume 18, 1139-1146, 2011.
[4] Enright AJ., el al. miRanda algorithm: MicroRNA targets in Drosophila. Genome Biology, Volume 5, R1, 2003.
Target genes for AS-tDR-013227
Target			Sites		TargetScan	miranda		Seed match types				Annotations
Seqname	GeneSymbol	Type	Diagrams	Total	Context+	Structure	Energy	8mer-1a	7mer-m8	7mer-1a	Imperfect	UTR Length
ENSRNOT00000020297	Lrrc39	Coding	Click Me	1	-0.423	143	-11.61	1	0	0	0	1636
ENSRNOT00000003715	Vps4b	Coding	Click Me	1	-0.333	152	-14.91	0	1	0	0	1296
ENSRNOT00000087540	Tmx1	Coding	Click Me	1	-0.347	143	-14.48	1	0	0	0	962
ENSRNOT00000031348	Slc9b1	Coding	Click Me	1	-0.319	151	-12.93	0	1	0	0	177
ENSRNOT00000008071	Stk35	Coding	Click Me	1	-0.489	158	-15.33	1	0	0	0	725
ENSRNOT00000036050	Rmdn1	Coding	Click Me	1	-0.316	154	-17.54	0	1	0	0	727
ENSRNOT00000066168	Pde4c	Coding	Click Me	1	-0.424	143	-10.28	1	0	0	0	563
ENSRNOT00000030370	Zfp17	Coding	Click Me	1	-0.364	151	-14.08	1	0	0	0	195
ENSRNOT00000090388	Trdn	Coding	Click Me	1	-0.322	147	-11.1	1	0	0	0	2175
ENSRNOT00000016882	Cnot7	Coding	Click Me	1	-0.324	155	-16.68	1	0	0	0	1455
ENSRNOT00000006190	Ppp1cb	Coding	Click Me	1	-0.312	151	-10.13	0	1	0	0	1676
ENSRNOT00000009718	Necab1	Coding	Click Me	1	-0.313	145	-11.89	1	0	0	0	3103
NM_053474	Ppp1r9b	Coding	Click Me	1	-0.349	144	-10.58	1	0	0	0	1534
ENSRNOT00000012060	Tmem218	Coding	Click Me	1	-0.373	141	-10.24	1	0	0	0	754
ENSRNOT00000025761	Zfp1	Coding	Click Me	1	-0.401	142	-11.19	1	0	0	0	50
ENSRNOT00000005620	Tlr7	Coding	Click Me	1	-0.398	142	-10.86	1	0	0	0	912
ENSRNOT00000017378	LOC108348235	Coding	Click Me	1	-0.386	141	-10.97	1	0	0	0	446
NM_001191688	Pcdh9	Coding	Click Me	1	-0.366	141	-12.06	1	0	0	0	1805
ENSRNOT00000021027	Umod	Coding	Click Me	1	-0.379	143	-10.4	1	0	0	0	259
ENSRNOT00000085896	Soat2	Coding	Click Me	1	-0.31	147	-18.24	1	0	0	0	331
ENSRNOT00000093181	Med14	Coding	Click Me	1	-0.465	154	-15.11	1	0	0	0	2212
ENSRNOT00000015976	Cd79b	Coding	Click Me	1	-0.327	155	-16.13	1	0	0	0	460
ENSRNOT00000045048	Sytl2	Coding	Click Me	1	-0.321	140	-10.28	1	0	0	0	893
ENSRNOT00000073771	Impact	Coding	Click Me	1	-0.346	149	-12.11	1	0	0	0	2352
ENSRNOT00000028368	Lsm12	Coding	Click Me	1	-0.348	141	-12.73	0	1	0	0	1591
ENSRNOT00000079196	Ensa	Coding	Click Me	1	-0.43	153	-14.33	1	0	0	0	1799
ENSRNOT00000010788	Slc13a1	Coding	Click Me	1	-0.304	147	-10.62	1	0	0	0	1071
ENSRNOT00000067312	Dppa1	Coding	Click Me	1	-0.453	146	-10.16	1	0	0	0	383
ENSRNOT00000022902	Prpf4b	Coding	Click Me	1	-0.319	151	-12.45	1	0	0	0	1282
ENSRNOT00000076137	Zfp35	Coding	Click Me	1	-0.332	145	-11.09	1	0	0	0	1799
ENSRNOT00000008399	Suv39h1l1	Coding	Click Me	1	-0.354	151	-13.4	1	0	0	0	1642
ENSRNOT00000017314	Espl1	Coding	Click Me	1	-0.322	142	-16.15	1	0	0	0	447
ENSRNOT00000022594	Pltp	Coding	Click Me	1	-0.408	142	-10.68	1	0	0	0	277
ENSRNOT00000005630	Chst7	Coding	Click Me	1	-0.335	149	-12.58	1	0	0	0	733
ENSRNOT00000080339	Tnnt3	Coding	Click Me	1	-0.315	163	-18.4	1	0	0	0	181
ENSRNOT00000049362	AABR07056556.1	Coding	Click Me	1	-0.438	148	-10.86	1	0	0	0	50
ENSRNOT00000042528	Bsn	Coding	Click Me	1	-0.321	151	-15.01	1	0	0	0	4045
ENSRNOT00000038093	Mstn	Coding	Click Me	1	-0.434	144	-12.72	1	0	0	0	1376
ENSRNOT00000065771	Chrna5	Coding	Click Me	1	-0.301	153	-18.31	1	0	0	0	1388
ENSRNOT00000018550	Usp49	Coding	Click Me	1	-0.323	149	-12.37	1	0	0	0	2853
ENSRNOT00000014692	Msantd1	Coding	Click Me	1	-0.382	149	-14.1	1	0	0	0	4111
ENSRNOT00000004901	Tbl1x	Coding	Click Me	1	-0.325	141	-11.4	1	0	0	0	3252
ENSRNOT00000014502	Lcp1	Coding	Click Me	1	-0.357	151	-11.15	1	0	0	0	1475
ENSRNOT00000065989	Lypd6b	Coding	Click Me	1	-0.368	163	-19.83	1	0	0	0	1285
ENSRNOT00000056654	Macc1	Coding	Click Me	1	-0.423	143	-12.55	1	0	0	0	1975
ENSRNOT00000091149	RGD1302996	Coding	Click Me	1	-0.339	146	-11.28	1	0	0	0	337
ENSRNOT00000064744	Npm1	Coding	Click Me	1	-0.468	162	-18.38	1	0	0	0	312
ENSRNOT00000079216	Sfrp4	Coding	Click Me	1	-0.361	144	-11.75	1	0	0	0	1640
ENSRNOT00000004912	Med28	Coding	Click Me	1	-0.305	158	-19.08	1	0	0	0	1507
ENSRNOT00000092614	Tab1	Coding	Click Me	1	-0.413	145	-10.78	1	0	0	0	223
ENSRNOT00000022778	Commd2	Coding	Click Me	1	-0.407	149	-10.59	1	0	0	0	1720
ENSRNOT00000023989	Pcmtd2	Coding	Click Me	1	-0.313	140	-10.95	1	0	0	0	2178
NM_001346427	LOC102549842	Coding	Click Me	1	-0.396	141	-11.4	1	0	0	0	1705
ENSRNOT00000015207	Pigs	Coding	Click Me	1	-0.415	145	-17.69	1	0	0	0	759
ENSRNOT00000066480	Med14	Coding	Click Me	1	-0.465	154	-15.11	1	0	0	0	518
NM_001107473	Zim1	Coding	Click Me	1	-0.354	141	-11.01	1	0	0	0	1185
ENSRNOT00000021407	Chdh	Coding	Click Me	1	-0.359	151	-13.96	0	1	0	0	1351
ENSRNOT00000005267	Ocrl	Coding	Click Me	1	-0.397	151	-14.87	1	0	0	0	1458
ENSRNOT00000079680	Tbl1x	Coding	Click Me	1	-0.325	141	-11.4	1	0	0	0	3249
ENSRNOT00000040598	Tnnt3	Coding	Click Me	1	-0.315	163	-18.4	1	0	0	0	175
ENSRNOT00000051525	Clec4a2	Coding	Click Me	1	-0.395	149	-12.19	1	0	0	0	340
ENSRNOT00000026915	Bbs1	Coding	Click Me	1	-0.364	145	-11.4	1	0	0	0	2187
NM_012790	Dspp	Coding	Click Me	1	-0.373	149	-13.88	1	0	0	0	1518
ENSRNOT00000049942	Canx	Coding	Click Me	1	-0.366	146	-10.88	1	0	0	0	3104
ENSRNOT00000027266	Rab40c	Coding	Click Me	1	-0.348	142	-12.96	1	0	0	0	1547
ENSRNOT00000072135	Ms4a4a	Coding	Click Me	1	-0.49	154	-11.17	1	0	0	0	323
ENSRNOT00000020419	Spryd7	Coding	Click Me	1	-0.382	150	-15.11	1	0	0	0	656
ENSRNOT00000087328	Pycr3	Coding	Click Me	2	-0.784	295	-22.3	2	0	0	0	578
ENSRNOT00000067904	Tab1	Coding	Click Me	1	-0.363	145	-10.78	1	0	0	0	1433
ENSRNOT00000027129	Kctd13	Coding	Click Me	1	-0.357	146	-15.21	1	0	0	0	528
ENSRNOT00000020416	Zim1	Coding	Click Me	1	-0.355	141	-11.01	1	0	0	0	1282
ENSRNOT00000088561	Fpgt	Coding	Click Me	1	-0.325	147	-12.81	0	1	0	0	1640
ENSRNOT00000066135	Tnnt3	Coding	Click Me	1	-0.315	163	-18.4	1	0	0	0	181
ENSRNOT00000082167	AABR07017635.2	Coding	Click Me	1	-0.391	154	-16.02	1	0	0	0	1667
ENSRNOT00000007276	Zc3h15	Coding	Click Me	1	-0.312	155	-12.13	0	1	0	0	683
ENSRNOT00000041413	Cdh7	Coding	Click Me	1	-0.348	151	-13.65	1	0	0	0	3125
NM_001013905	Dpcd	Coding	Click Me	1	-0.515	149	-10.28	1	0	0	0	858
NM_021666	Trdn	Coding	Click Me	1	-0.322	147	-11.1	1	0	0	0	2162
ENSRNOT00000064535	Eif4g2	Coding	Click Me	1	-0.416	150	-14.98	1	0	0	0	1963
ENSRNOT00000004609	Myo1d	Coding	Click Me	1	-0.46	144	-10.35	1	0	0	0	2098
ENSRNOT00000051425	Tnnt3	Coding	Click Me	1	-0.315	163	-18.4	1	0	0	0	181
ENSRNOT00000082191	Lcp1	Coding	Click Me	1	-0.357	151	-11.15	1	0	0	0	1477
ENSRNOT00000018074	Rcn1	Coding	Click Me	1	-0.34	153	-14.4	0	1	0	0	219
ENSRNOT00000065633	Ccng1	Coding	Click Me	1	-0.365	142	-12.4	1	0	0	0	2079
ENSRNOT00000036690	Gpr171	Coding	Click Me	1	-0.336	148	-13.72	1	0	0	0	609
NM_001107795	Phf20	Coding	Click Me	1	-0.326	148	-10.48	1	0	0	0	1527
ENSRNOT00000011208	Tagln2	Coding	Click Me	1	-0.342	143	-10.28	1	0	0	0	640
ENSRNOT00000045946	Git2	Coding	Click Me	1	-0.317	142	-11.72	0	1	0	0	740
ENSRNOT00000088304	Chrna5	Coding	Click Me	1	-0.301	153	-18.31	1	0	0	0	1428
ENSRNOT00000049745	Cfap410	Coding	Click Me	1	-0.322	149	-10.83	1	0	0	0	949
ENSRNOT00000017996	Crisp2	Coding	Click Me	1	-0.395	148	-12.78	1	0	0	0	465
ENSRNOT00000089497	Ppp1r9b	Coding	Click Me	1	-0.35	144	-10.58	1	0	0	0	1527
ENSRNOT00000014269	Mlst8	Coding	Click Me	1	-0.428	150	-12.57	1	0	0	0	2256
ENSRNOT00000015092	Pkd1	Coding	Click Me	1	-0.301	146	-10.03	1	0	0	0	931
ENSRNOT00000064679	Calm2	Coding	Click Me	1	-0.384	142	-12.12	1	0	0	0	882
ENSRNOT00000017607	Grm2	Coding	Click Me	1	-0.327	147	-10.45	1	0	0	0	1760
ENSRNOT00000022845	Grp	Coding	Click Me	1	-0.394	152	-16.53	1	0	0	0	311
ENSRNOT00000082419	RGD1560212	Coding	Click Me	1	-0.31	143	-13.01	1	0	0	0	605
ENSRNOT00000072082	Vom1r95	Coding	Click Me	1	-0.414	150	-13.55	1	0	0	0	50
ENSRNOT00000005568	Trappc6b	Coding	Click Me	1	-0.383	146	-15.06	1	0	0	0	511
ENSRNOT00000021671	Parva	Coding	Click Me	1	-0.339	145	-12.73	1	0	0	0	3059
ENSRNOT00000014013	Cdh18	Coding	Click Me	1	-0.385	144	-10.43	1	0	0	0	1929
NM_001106964	Tbl1x	Coding	Click Me	1	-0.325	141	-11.4	1	0	0	0	3255
ENSRNOT00000012913	Prokr1	Coding	Click Me	1	-0.365	150	-12.32	1	0	0	0	1474
ENSRNOT00000018689	Ing2	Coding	Click Me	1	-0.398	149	-12.53	1	0	0	0	1450
ENSRNOT00000007993	LRRTM1	Coding	Click Me	1	-0.353	140	-11.9	1	0	0	0	746
ENSRNOT00000029511	Armcx2	Coding	Click Me	1	-0.43	150	-11.92	1	0	0	0	386
ENSRNOT00000065640	Tlr12	Coding	Click Me	1	-0.301	148	-14.24	1	0	0	0	944

## Sheet: AS-tDR-013228
Predicted target genes for AS-tDR-013228
# Column A: Seqname, the name the sequence.
# Column B: GeneSymbol, the official gene symbol of the sequence.
# Column C: Type, the type of the transcipt.
# Column D: Diagrams, the diagrams illustrate key features for miRNA binding. See Ref [1,2] for details.
# Column E: Total, the total number of the binding sites on the targets.
# Column F: Context+, the sum of the context+ scores used in TargetScan after version 6.0. More negative is better. See Ref [3] for details.
# Column G: Structure, the sum of the structure scores used in miRanda (Ref [4]). The higher the better.
# Column H: Energy, the sum of the free energy predicted by miRanda (Ref [4]). More negative is better.
# Column I ~ Column L: Counting numbers for different seed match types
# Reference:
[1] Grimson A., et al. MicroRNA Targeting Specificity in Mammals: Determinants beyond Seed Pairing. Molecular Cell, Volume 27, Issue 1, 91-105, 6 July 2007.
[2] Amy E. Pasquinelli. MicroRNAs and their targets: recognition, regulation and an emerging reciprocal relationship. Nature Reviews Genetics, Volume 13, 271-282, 1 April 2012.
[3] David M Garcia., et al. Weak Seed-Pairing Stability and High Target-Site Abundance Decrease the Proficiency of lsy-6 and Other miRNAs. Nat. Struct. Mol. Biol., Volume 18, 1139-1146, 2011.
[4] Enright AJ., el al. miRanda algorithm: MicroRNA targets in Drosophila. Genome Biology, Volume 5, R1, 2003.
Target genes for AS-tDR-013228
Target			Sites		TargetScan	miranda		Seed match types				Annotations
Seqname	GeneSymbol	Type	Diagrams	Total	Context+	Structure	Energy	8mer-1a	7mer-m8	7mer-1a	Imperfect	UTR Length
ENSRNOT00000020297	Lrrc39	Coding	Click Me	1	-0.423	143	-11.61	1	0	0	0	1636
ENSRNOT00000081160	Rapsn	Coding	Click Me	1	-0.313	146	-10.13	1	0	0	0	223
ENSRNOT00000003715	Vps4b	Coding	Click Me	1	-0.333	157	-14.91	0	1	0	0	1296
ENSRNOT00000087540	Tmx1	Coding	Click Me	1	-0.347	143	-14.48	1	0	0	0	962
ENSRNOT00000031348	Slc9b1	Coding	Click Me	1	-0.329	156	-13.96	0	1	0	0	177
ENSRNOT00000008071	Stk35	Coding	Click Me	1	-0.489	163	-15.33	1	0	0	0	725
ENSRNOT00000036050	Rmdn1	Coding	Click Me	1	-0.316	156	-17.54	0	1	0	0	727
ENSRNOT00000036625	RGD1560958	Coding	Click Me	1	-0.305	152	-10.46	0	1	0	0	150
ENSRNOT00000066168	Pde4c	Coding	Click Me	1	-0.424	147	-11.64	1	0	0	0	563
ENSRNOT00000030370	Zfp17	Coding	Click Me	1	-0.364	152	-14.08	1	0	0	0	195
ENSRNOT00000090388	Trdn	Coding	Click Me	1	-0.322	147	-11.1	1	0	0	0	2175
ENSRNOT00000016882	Cnot7	Coding	Click Me	1	-0.324	156	-17.77	1	0	0	0	1455
ENSRNOT00000006190	Ppp1cb	Coding	Click Me	1	-0.312	156	-10.78	0	1	0	0	1676
ENSRNOT00000009718	Necab1	Coding	Click Me	1	-0.313	145	-11.89	1	0	0	0	3103
NM_053474	Ppp1r9b	Coding	Click Me	1	-0.349	146	-13.19	1	0	0	0	1534
ENSRNOT00000012060	Tmem218	Coding	Click Me	1	-0.373	144	-10.24	1	0	0	0	754
ENSRNOT00000025761	Zfp1	Coding	Click Me	1	-0.401	142	-11.19	1	0	0	0	50
ENSRNOT00000005620	Tlr7	Coding	Click Me	1	-0.398	142	-10.86	1	0	0	0	912
ENSRNOT00000017378	LOC108348235	Coding	Click Me	1	-0.386	142	-10.97	1	0	0	0	446
NM_001191688	Pcdh9	Coding	Click Me	1	-0.366	141	-12.06	1	0	0	0	1805
ENSRNOT00000021027	Umod	Coding	Click Me	1	-0.379	143	-10.4	1	0	0	0	259
ENSRNOT00000085896	Soat2	Coding	Click Me	1	-0.31	148	-19.51	1	0	0	0	331
ENSRNOT00000093181	Med14	Coding	Click Me	1	-0.465	154	-15.11	1	0	0	0	2212
ENSRNOT00000015976	Cd79b	Coding	Click Me	1	-0.327	156	-16.3	1	0	0	0	460
ENSRNOT00000064483	Cobl	Coding	Click Me	1	-0.43	150	-10.16	1	0	0	0	1365
ENSRNOT00000045048	Sytl2	Coding	Click Me	1	-0.321	140	-11.17	1	0	0	0	893
ENSRNOT00000073771	Impact	Coding	Click Me	1	-0.346	149	-12.11	1	0	0	0	2352
NM_012723	Pigr	Coding	Click Me	1	-0.36	140	-13.39	1	0	0	0	1383
ENSRNOT00000079196	Ensa	Coding	Click Me	1	-0.43	155	-14.51	1	0	0	0	1799
ENSRNOT00000010788	Slc13a1	Coding	Click Me	1	-0.304	147	-10.62	1	0	0	0	1071
ENSRNOT00000067312	Dppa1	Coding	Click Me	1	-0.453	146	-10.26	1	0	0	0	383
ENSRNOT00000018550	Usp49	Coding	Click Me	1	-0.323	150	-13.46	1	0	0	0	2853
ENSRNOT00000076137	Zfp35	Coding	Click Me	1	-0.332	145	-11.09	1	0	0	0	1799
ENSRNOT00000008399	Suv39h1l1	Coding	Click Me	1	-0.354	154	-13.6	1	0	0	0	1642
ENSRNOT00000005834	Mtif2	Coding	Click Me	1	-0.48	150	-10.75	1	0	0	0	195
ENSRNOT00000017314	Espl1	Coding	Click Me	1	-0.322	143	-16.15	1	0	0	0	447
ENSRNOT00000022594	Pltp	Coding	Click Me	1	-0.408	147	-10.68	1	0	0	0	277
ENSRNOT00000046645	Mctp2	Coding	Click Me	1	-0.369	147	-12.4	1	0	0	0	4757
ENSRNOT00000064679	Calm2	Coding	Click Me	1	-0.384	142	-12.12	1	0	0	0	882
ENSRNOT00000080339	Tnnt3	Coding	Click Me	1	-0.315	163	-18.4	1	0	0	0	181
ENSRNOT00000049362	AABR07056556.1	Coding	Click Me	1	-0.438	148	-10.86	1	0	0	0	50
ENSRNOT00000042528	Bsn	Coding	Click Me	1	-0.321	152	-16.11	1	0	0	0	4045
ENSRNOT00000038093	Mstn	Coding	Click Me	1	-0.434	144	-13.24	1	0	0	0	1376
ENSRNOT00000065771	Chrna5	Coding	Click Me	1	-0.301	158	-19.41	1	0	0	0	1388
ENSRNOT00000022902	Prpf4b	Coding	Click Me	1	-0.319	154	-12.45	1	0	0	0	1282
ENSRNOT00000014692	Msantd1	Coding	Click Me	1	-0.382	149	-14.1	1	0	0	0	4111
ENSRNOT00000004901	Tbl1x	Coding	Click Me	1	-0.325	141	-11.4	1	0	0	0	3252
ENSRNOT00000011208	Tagln2	Coding	Click Me	1	-0.342	143	-10.28	1	0	0	0	640
ENSRNOT00000014502	Lcp1	Coding	Click Me	1	-0.357	156	-12.7	1	0	0	0	1475
ENSRNOT00000065989	Lypd6b	Coding	Click Me	1	-0.368	168	-20.93	1	0	0	0	1285
ENSRNOT00000056654	Macc1	Coding	Click Me	1	-0.433	148	-13.59	1	0	0	0	1975
ENSRNOT00000077049	Mctp2	Coding	Click Me	1	-0.369	147	-12.4	1	0	0	0	2951
ENSRNOT00000091149	RGD1302996	Coding	Click Me	1	-0.339	146	-11.28	1	0	0	0	337
ENSRNOT00000029411	Mis18bp1	Coding	Click Me	1	-0.456	142	-11.01	1	0	0	0	50
ENSRNOT00000064744	Npm1	Coding	Click Me	1	-0.468	167	-18.38	1	0	0	0	312
ENSRNOT00000079216	Sfrp4	Coding	Click Me	1	-0.371	149	-12.78	1	0	0	0	1640
NM_001191584	Myom1	Coding	Click Me	1	-0.374	144	-10.83	1	0	0	0	481
ENSRNOT00000092614	Tab1	Coding	Click Me	1	-0.413	145	-10.78	1	0	0	0	223
ENSRNOT00000004912	Med28	Coding	Click Me	1	-0.305	158	-19.08	1	0	0	0	1507
ENSRNOT00000068444	Rapsn	Coding	Click Me	1	-0.313	146	-10.13	1	0	0	0	185
ENSRNOT00000028368	Lsm12	Coding	Click Me	1	-0.348	141	-12.73	0	1	0	0	1591
ENSRNOT00000022778	Commd2	Coding	Click Me	1	-0.407	149	-10.59	1	0	0	0	1720
ENSRNOT00000023989	Pcmtd2	Coding	Click Me	1	-0.313	140	-12.24	1	0	0	0	2178
NM_001346427	LOC102549842	Coding	Click Me	1	-0.396	141	-11.4	1	0	0	0	1705
ENSRNOT00000015207	Pigs	Coding	Click Me	1	-0.415	147	-17.69	1	0	0	0	759
ENSRNOT00000066480	Med14	Coding	Click Me	1	-0.465	154	-15.11	1	0	0	0	518
NM_001107473	Zim1	Coding	Click Me	1	-0.354	146	-12.81	1	0	0	0	1185
ENSRNOT00000021407	Chdh	Coding	Click Me	1	-0.369	156	-14.99	0	1	0	0	1351
ENSRNOT00000005267	Ocrl	Coding	Click Me	1	-0.397	156	-15.49	1	0	0	0	1458
ENSRNOT00000079680	Tbl1x	Coding	Click Me	1	-0.325	141	-11.4	1	0	0	0	3249
ENSRNOT00000040598	Tnnt3	Coding	Click Me	1	-0.315	163	-18.4	1	0	0	0	175
ENSRNOT00000051525	Clec4a2	Coding	Click Me	1	-0.395	149	-12.19	1	0	0	0	340
ENSRNOT00000068003	Mfsd4a	Coding	Click Me	1	-0.312	140	-12.75	1	0	0	0	1624
ENSRNOT00000026915	Bbs1	Coding	Click Me	1	-0.364	145	-11.4	1	0	0	0	2187
NM_001033679	Prkar1b	Coding	Click Me	1	-0.316	149	-10.04	1	0	0	0	1183
ENSRNOT00000022845	Grp	Coding	Click Me	1	-0.394	152	-16.53	1	0	0	0	311
ENSRNOT00000082419	RGD1560212	Coding	Click Me	1	-0.31	143	-13.01	1	0	0	0	605
ENSRNOT00000027266	Rab40c	Coding	Click Me	1	-0.348	142	-12.96	1	0	0	0	1547
ENSRNOT00000072135	Ms4a4a	Coding	Click Me	1	-0.49	156	-11.17	1	0	0	0	323
ENSRNOT00000020419	Spryd7	Coding	Click Me	1	-0.382	150	-15.11	1	0	0	0	656
ENSRNOT00000087328	Pycr3	Coding	Click Me	2	-0.794	300	-23.33	2	0	0	0	578
ENSRNOT00000067904	Tab1	Coding	Click Me	1	-0.363	145	-10.78	1	0	0	0	1433
ENSRNOT00000027129	Kctd13	Coding	Click Me	1	-0.357	150	-15.38	1	0	0	0	528
ENSRNOT00000020416	Zim1	Coding	Click Me	1	-0.355	146	-12.81	1	0	0	0	1282
ENSRNOT00000088561	Fpgt	Coding	Click Me	1	-0.325	150	-13.61	0	1	0	0	1640
ENSRNOT00000066135	Tnnt3	Coding	Click Me	1	-0.315	163	-18.4	1	0	0	0	181
ENSRNOT00000084825	Nudt6	Coding	Click Me	1	-0.323	141	-10.5	1	0	0	0	461
ENSRNOT00000082167	AABR07017635.2	Coding	Click Me	1	-0.391	156	-16.02	1	0	0	0	1667
ENSRNOT00000081579	Eno1	Coding	Click Me	1	-0.343	142	-11.06	1	0	0	0	301
ENSRNOT00000007276	Zc3h15	Coding	Click Me	1	-0.312	160	-12.13	0	1	0	0	683
ENSRNOT00000041413	Cdh7	Coding	Click Me	1	-0.348	156	-13.65	1	0	0	0	3125
NM_001013905	Dpcd	Coding	Click Me	1	-0.526	149	-10.28	1	0	0	0	858
NM_001109157	RGD1560958	Coding	Click Me	1	-0.304	152	-10.46	0	1	0	0	153
NM_021666	Trdn	Coding	Click Me	1	-0.322	147	-11.1	1	0	0	0	2162
ENSRNOT00000035013	Lipo1	Coding	Click Me	1	-0.371	143	-14.24	1	0	0	0	1083
ENSRNOT00000064535	Eif4g2	Coding	Click Me	1	-0.416	155	-14.98	1	0	0	0	1963
ENSRNOT00000004609	Myo1d	Coding	Click Me	1	-0.46	144	-10.35	1	0	0	0	2098
ENSRNOT00000051425	Tnnt3	Coding	Click Me	1	-0.315	163	-18.4	1	0	0	0	181
ENSRNOT00000082191	Lcp1	Coding	Click Me	1	-0.357	156	-12.7	1	0	0	0	1477
ENSRNOT00000018074	Rcn1	Coding	Click Me	1	-0.34	154	-15.05	0	1	0	0	219
ENSRNOT00000065633	Ccng1	Coding	Click Me	1	-0.365	144	-12.4	1	0	0	0	2079
ENSRNOT00000091202	Mis18bp1	Coding	Click Me	1	-0.454	142	-11.01	1	0	0	0	196
ENSRNOT00000036690	Gpr171	Coding	Click Me	1	-0.336	148	-13.72	1	0	0	0	609
NM_001107795	Phf20	Coding	Click Me	1	-0.326	148	-10.48	1	0	0	0	1527
ENSRNOT00000035808	Zfp292	Coding	Click Me	1	-0.39	143	-14.13	1	0	0	0	1813
ENSRNOT00000045946	Git2	Coding	Click Me	1	-0.317	147	-12.49	0	1	0	0	740
ENSRNOT00000086154	Cobl	Coding	Click Me	1	-0.43	150	-10.16	1	0	0	0	1406
ENSRNOT00000088304	Chrna5	Coding	Click Me	1	-0.301	158	-19.41	1	0	0	0	1428
ENSRNOT00000049745	Cfap410	Coding	Click Me	1	-0.322	149	-10.83	1	0	0	0	949
ENSRNOT00000017996	Crisp2	Coding	Click Me	1	-0.395	148	-12.88	1	0	0	0	465
ENSRNOT00000089497	Ppp1r9b	Coding	Click Me	1	-0.35	146	-13.19	1	0	0	0	1527
ENSRNOT00000014269	Mlst8	Coding	Click Me	1	-0.428	155	-14.5	1	0	0	0	2256
ENSRNOT00000015092	Pkd1	Coding	Click Me	1	-0.301	146	-10.03	1	0	0	0	931
ENSRNOT00000005630	Chst7	Coding	Click Me	1	-0.335	150	-12.58	1	0	0	0	733
ENSRNOT00000017607	Grm2	Coding	Click Me	1	-0.337	152	-10.82	1	0	0	0	1760
NM_012790	Dspp	Coding	Click Me	1	-0.373	154	-14.65	1	0	0	0	1518
ENSRNOT00000049942	Canx	Coding	Click Me	1	-0.366	146	-11.08	1	0	0	0	3104
ENSRNOT00000072082	Vom1r95	Coding	Click Me	1	-0.414	151	-13.55	1	0	0	0	50
ENSRNOT00000005568	Trappc6b	Coding	Click Me	1	-0.383	151	-15.06	1	0	0	0	511
ENSRNOT00000021671	Parva	Coding	Click Me	1	-0.339	146	-13.52	1	0	0	0	3059
ENSRNOT00000014013	Cdh18	Coding	Click Me	1	-0.385	144	-10.43	1	0	0	0	1929
NM_001106964	Tbl1x	Coding	Click Me	1	-0.325	141	-11.4	1	0	0	0	3255
ENSRNOT00000012913	Prokr1	Coding	Click Me	1	-0.365	150	-12.32	1	0	0	0	1474
ENSRNOT00000018689	Ing2	Coding	Click Me	1	-0.398	149	-12.53	1	0	0	0	1450
ENSRNOT00000007993	LRRTM1	Coding	Click Me	1	-0.353	140	-11.9	1	0	0	0	746
ENSRNOT00000029511	Armcx2	Coding	Click Me	1	-0.43	152	-11.92	1	0	0	0	386
ENSRNOT00000065640	Tlr12	Coding	Click Me	1	-0.301	148	-14.24	1	0	0	0	944

[truncated: 1 more sheets:  AS-tDR-013642]
