# Supplementary material for: Systematic Analysis of tRNA-Derived Small RNAs Reveals Effects of Xuefu-Zhuyu Decoction on Hippocampus of Rats after Traumatic Brain Injury
Source: Research Square preprint supplement (doi:10.21203/rs.3.rs-826529/v1), 2021-09-02
Supplement: Supplementary file 2 [file c5961be6d93d0b2ba2a50089.xlsx]

## Sheet: tDR_express_AllComparison
#tDRs_ID: the database ID of tRNA
#tRFdb_ID: the database ID of tRF
#mintbase_ID: the tRNA ID in mintbase
#tRNA: the name of tRNA
#Left: the left of tRNA
#Right: the right of tRNA
#tRNASeq: the sequence of tRNA
#tRNALength: the length of tRNA sequence
#tRNASecondStructure: the secondary structure of tRNA
#AlignmentSequence: the sequence from reads which could be aligned to tRNA
#tDR_Type: the type of tRNA
#AlignmentLength: the length of alignment sequence
#AlignmentInformation: the information of alignment
#TagCount: the tag count of read sequence
#tRF_TPM: the tag count per million reads
#fold_change: the fold change of TPM values between two groups. Negative number represents the down-regulated expression, and positive number represents the up-regulated expression.
#p_value: the p-value of TPM values between two groups
#FDR: the adjusted p-value of TPM values between two groups
tDRs_ID	tRFdb_ID	mintbase_ID	tRNA	Left	Right	tRNASeq	tRNALength	tRNASecondStructure	AlignmentSequence	tDR_Type	AlignmentLength	AlignmentInformation	TagCount	TagCount	TagCount	TagCount	TagCount	TagCount	TagCount	TagCount	TagCount	TagCount	TagCount	TagCount	tRF_TPM	tRF_TPM	tRF_TPM	tRF_TPM	tRF_TPM	tRF_TPM	tRF_TPM	tRF_TPM	tRF_TPM	tRF_TPM	tRF_TPM	tRF_TPM	fold_change	p_value	FDR	fold_change	p_value	FDR	fold_change	p_value	FDR
													A156h	A158h	A162h	A180h	B157h	B159h	B160h	B161h	C166h	C167h	C169h	C170h	A156h	A158h	A162h	A180h	B157h	B159h	B160h	B161h	C166h	C167h	C169h	C170h	B_A	B_A	B_A	C_B	C_B	C_B	C_A	C_A	C_A
AS-tDR-007217	-	-	chr10.trna11254-GlyGCC	1	30	GCATTGGTGGTTCAGTGGTAGAATTCTCGCCTGCCACGCGGGAGGCCCGGGTTCGATTCCCGGCCAATGCACCA	74	)))))))..)))).......((((.))))).......(((((....))))).......((((((((((((.	GCATTGTGGTTCAGTGGTAGAATTCTCGCC	tRF-5	30	6-G	422	291	288	320	2623	1890	2782	2005	3538	2164	2049	3408	4317.18	4373.77	3977.3	3982.53	15959.6	11644.3	11248.9	10213.8	15867.8	13541.2	13377.6	16851.2	2.94633	0.000701893	0.0048614	1.21543	0.135375	0.399506	3.58106	1.69507e-05	0.000659455
AS-tDR-007243	-	-	chr10.trna11254-GlyGCC	1	31	GCATTGGTGGTTCAGTGGTAGAATTCTCGCCTGCCACGCGGGAGGCCCGGGTTCGATTCCCGGCCAATGCACCA	74	)))))))..)))).......((((.))))).......(((((....))))).......((((((((((((.	GCATTGGTGGTTCAGTGGTAGAATTCTCGCA	tiRNA-5	31	31C>A	1472	1023	1261	1171	8181	7314	10194	8025	10204	7091	6108	8927	15059	15375.8	17414.5	14573.6	49777	45061.6	41218.9	40880.7	45764.6	44371.7	39878.3	44140.4	2.83439	1.16672e-05	0.000335961	-1.01598	0.78469	1	2.78981	1.10539e-06	0.000134748
AS-tDR-000011	-	-	chr10.trna11254-GlyGCC	1	31	GCATTGGTGGTTCAGTGGTAGAATTCTCGCCTGCCACGCGGGAGGCCCGGGTTCGATTCCCGGCCAATGCACCA	74	)))))))..)))).......((((.))))).......(((((....))))).......((((((((((((.	GCATTGGTGGTTCAGTGGTAGAATTCTCGCC	tiRNA-5	31	ExactMatch	3775	2342	2838	2642	21401	17776	25419	18449	23956	17800	15419	25093	38619.3	35200.6	39192.9	32880.7	130214	109518	102780	93982.3	107442	111383	100669	124075	2.99181	9.04354e-05	0.00124332	1.01621	0.853136	1	3.0403	6.80096e-06	0.000331032
AS-tDR-007238	-	-	chr10.trna11254-GlyGCC	1	31	GCATTGGTGGTTCAGTGGTAGAATTCTCGCCTGCCACGCGGGAGGCCCGGGTTCGATTCCCGGCCAATGCACCA	74	)))))))..)))).......((((.))))).......(((((....))))).......((((((((((((.	GCATTGGTGGTTCAGTGGTAGAATTCTCGCT	tiRNA-5	31	31C>T	4605	2980	3557	3243	24756	21737	28894	22442	30176	20613	17031	26546	47110.5	44789.8	49122.4	40360.4	150627	133922	116831	114323	135338	128985	111193	131259	2.84313	7.04432e-05	0.0011152	-1.01762	0.830553	1	2.79391	7.06057e-06	0.000331032
AS-tDR-008139	-	-	chr10.trna11254-GlyGCC	1	32	GCATTGGTGGTTCAGTGGTAGAATTCTCGCCTGCCACGCGGGAGGCCCGGGTTCGATTCCCGGCCAATGCACCA	74	)))))))..)))).......((((.))))).......(((((....))))).......((((((((((((.	GCATTGGTGGTTCAGTGGTAGAATTCTCGCCA	tiRNA-5	32	32T>A	1442	845	1427	1213	2031	2054	2705	4214	5567	2840	2255	3091	14752.1	12700.5	19707	15096.3	12357.5	12654.7	10937.5	21466.8	24967.8	17771.2	14722.6	15283.7	-1.08428	0.682821	0.710204	1.26696	0.297934	0.60396	1.16848	0.38214	0.401923
AS-tDR-001297	-	-	chr10.trna11254-GlyGCC	1	32	GCATTGGTGGTTCAGTGGTAGAATTCTCGCCTGCCACGCGGGAGGCCCGGGTTCGATTCCCGGCCAATGCACCA	74	)))))))..)))).......((((.))))).......(((((....))))).......((((((((((((.	GCATTGGTGGTTCAGTGGTAGAATTCTCGCCT	tiRNA-5	32	ExactMatch	8080	4446	7389	6219	11522	10805	14169	21180	29783	16305	12328	19390	82660.7	66824	102043	77397.9	70105.2	66569.7	57291.5	107894	133576	102028	80487.8	95875.7	-1.08966	0.630718	0.659011	1.36475	0.131445	0.399506	1.25246	0.171611	0.226401
AS-tDR-009271	-	-	chr10.trna11254-GlyGCC	1	51	GCATTGGTGGTTCAGTGGTAGAATTCTCGCCTGCCACGCGGGAGGCCCGGGTTCGATTCCCGGCCAATGCACCA	74	)))))))..)))).......((((.))))).......(((((....))))).......((((((((((((.	GCATTGGTGGTTCAGTGGTAGAATTCTCGCCTGCCACGCGGGAGGCCCGGG	tRF-5	51	ExactMatch	1179	682	1188	1213	918	1001	1827	1473	823	1225	1191	1762	12061.5	10250.6	16406.3	15096.3	5585.54	6167.17	7387.37	7503.71	3691.13	7665.4	7775.88	8712.38	-2.01963	0.00372133	0.0128244	1.04507	0.812241	1	-1.93253	0.0110563	0.0386673
AS-tDR-013629	-	-	chr10.trna11254-GlyGCC	3	35	GCATTGGTGGTTCAGTGGTAGAATTCTCGCCTGCCACGCGGGAGGCCCGGGTTCGATTCCCGGCCAATGCACCA	74	)))))))..)))).......((((.))))).......(((((....))))).......((((((((((((.	ATTGGTGGTTCAGTGGTAGAATTCTCGCCTGCT	i-tRF	33	33C>T	270	330	240	448	118	540	2829	270	401	213	128	130	2762.18	4959.94	3314.41	5575.54	717.967	3326.95	11438.9	1375.42	1798.47	1332.84	835.695	642.797	1.01488	0.981518	0.994297	-3.65495	0.263842	0.572963	-3.60138	0.00568061	0.0262757
AS-tDR-007217	-	-	chr13.trna2238-GlyGCC	1	30	GCATTGGTGGTTCAGTGGTAGAATTCTCGCCTGCCACGCGGGAGGCCCGGGTTCGATTCCCGGCCAATGCACCA	74	)))))))..)))).......((((.))))).......(((((....))))).......((((((((((((.	GCATTGTGGTTCAGTGGTAGAATTCTCGCC	tRF-5	30	6-G	422	291	288	320	2623	1890	2782	2005	3538	2164	2049	3408	4317.18	4373.77	3977.3	3982.53	15959.6	11644.3	11248.9	10213.8	15867.8	13541.2	13377.6	16851.2	2.94633	0.000701893	0.0048614	1.21543	0.135375	0.399506	3.58106	1.69507e-05	0.000659455
AS-tDR-007243	-	-	chr13.trna2238-GlyGCC	1	31	GCATTGGTGGTTCAGTGGTAGAATTCTCGCCTGCCACGCGGGAGGCCCGGGTTCGATTCCCGGCCAATGCACCA	74	)))))))..)))).......((((.))))).......(((((....))))).......((((((((((((.	GCATTGGTGGTTCAGTGGTAGAATTCTCGCA	tiRNA-5	31	31C>A	1472	1023	1261	1171	8181	7314	10194	8025	10204	7091	6108	8927	15059	15375.8	17414.5	14573.6	49777	45061.6	41218.9	40880.7	45764.6	44371.7	39878.3	44140.4	2.83439	1.16672e-05	0.000335961	-1.01598	0.78469	1	2.78981	1.10539e-06	0.000134748
AS-tDR-000011	-	-	chr13.trna2238-GlyGCC	1	31	GCATTGGTGGTTCAGTGGTAGAATTCTCGCCTGCCACGCGGGAGGCCCGGGTTCGATTCCCGGCCAATGCACCA	74	)))))))..)))).......((((.))))).......(((((....))))).......((((((((((((.	GCATTGGTGGTTCAGTGGTAGAATTCTCGCC	tiRNA-5	31	ExactMatch	3775	2342	2838	2642	21401	17776	25419	18449	23956	17800	15419	25093	38619.3	35200.6	39192.9	32880.7	130214	109518	102780	93982.3	107442	111383	100669	124075	2.99181	9.04354e-05	0.00124332	1.01621	0.853136	1	3.0403	6.80096e-06	0.000331032
AS-tDR-007238	-	-	chr13.trna2238-GlyGCC	1	31	GCATTGGTGGTTCAGTGGTAGAATTCTCGCCTGCCACGCGGGAGGCCCGGGTTCGATTCCCGGCCAATGCACCA	74	)))))))..)))).......((((.))))).......(((((....))))).......((((((((((((.	GCATTGGTGGTTCAGTGGTAGAATTCTCGCT	tiRNA-5	31	31C>T	4605	2980	3557	3243	24756	21737	28894	22442	30176	20613	17031	26546	47110.5	44789.8	49122.4	40360.4	150627	133922	116831	114323	135338	128985	111193	131259	2.84313	7.04432e-05	0.0011152	-1.01762	0.830553	1	2.79391	7.06057e-06	0.000331032
AS-tDR-008139	-	-	chr13.trna2238-GlyGCC	1	32	GCATTGGTGGTTCAGTGGTAGAATTCTCGCCTGCCACGCGGGAGGCCCGGGTTCGATTCCCGGCCAATGCACCA	74	)))))))..)))).......((((.))))).......(((((....))))).......((((((((((((.	GCATTGGTGGTTCAGTGGTAGAATTCTCGCCA	tiRNA-5	32	32T>A	1442	845	1427	1213	2031	2054	2705	4214	5567	2840	2255	3091	14752.1	12700.5	19707	15096.3	12357.5	12654.7	10937.5	21466.8	24967.8	17771.2	14722.6	15283.7	-1.08428	0.682821	0.710204	1.26696	0.297934	0.60396	1.16848	0.38214	0.401923
AS-tDR-001297	-	-	chr13.trna2238-GlyGCC	1	32	GCATTGGTGGTTCAGTGGTAGAATTCTCGCCTGCCACGCGGGAGGCCCGGGTTCGATTCCCGGCCAATGCACCA	74	)))))))..)))).......((((.))))).......(((((....))))).......((((((((((((.	GCATTGGTGGTTCAGTGGTAGAATTCTCGCCT	tiRNA-5	32	ExactMatch	8080	4446	7389	6219	11522	10805	14169	21180	29783	16305	12328	19390	82660.7	66824	102043	77397.9	70105.2	66569.7	57291.5	107894	133576	102028	80487.8	95875.7	-1.08966	0.630718	0.659011	1.36475	0.131445	0.399506	1.25246	0.171611	0.226401
AS-tDR-009271	-	-	chr13.trna2238-GlyGCC	1	51	GCATTGGTGGTTCAGTGGTAGAATTCTCGCCTGCCACGCGGGAGGCCCGGGTTCGATTCCCGGCCAATGCACCA	74	)))))))..)))).......((((.))))).......(((((....))))).......((((((((((((.	GCATTGGTGGTTCAGTGGTAGAATTCTCGCCTGCCACGCGGGAGGCCCGGG	tRF-5	51	ExactMatch	1179	682	1188	1213	918	1001	1827	1473	823	1225	1191	1762	12061.5	10250.6	16406.3	15096.3	5585.54	6167.17	7387.37	7503.71	3691.13	7665.4	7775.88	8712.38	-2.01963	0.00372133	0.0128244	1.04507	0.812241	1	-1.93253	0.0110563	0.0386673
AS-tDR-013629	-	-	chr13.trna2238-GlyGCC	3	35	GCATTGGTGGTTCAGTGGTAGAATTCTCGCCTGCCACGCGGGAGGCCCGGGTTCGATTCCCGGCCAATGCACCA	74	)))))))..)))).......((((.))))).......(((((....))))).......((((((((((((.	ATTGGTGGTTCAGTGGTAGAATTCTCGCCTGCT	i-tRF	33	33C>T	270	330	240	448	118	540	2829	270	401	213	128	130	2762.18	4959.94	3314.41	5575.54	717.967	3326.95	11438.9	1375.42	1798.47	1332.84	835.695	642.797	1.01488	0.981518	0.994297	-3.65495	0.263842	0.572963	-3.60138	0.00568061	0.0262757
AS-tDR-007217	-	-	chr17.trna1897-GlyGCC	1	30	GCATTGGTGGTTCAGTGGTAGAATTCTCGCCTGCCACGCGGGAGGCCCGGGTTCGATTCCCGGCCAATGCACCA	74	)))))))..)))).......((((.))))).......(((((....))))).......((((((((((((.	GCATTGTGGTTCAGTGGTAGAATTCTCGCC	tRF-5	30	6-G	422	291	288	320	2623	1890	2782	2005	3538	2164	2049	3408	4317.18	4373.77	3977.3	3982.53	15959.6	11644.3	11248.9	10213.8	15867.8	13541.2	13377.6	16851.2	2.94633	0.000701893	0.0048614	1.21543	0.135375	0.399506	3.58106	1.69507e-05	0.000659455
AS-tDR-007243	-	-	chr17.trna1897-GlyGCC	1	31	GCATTGGTGGTTCAGTGGTAGAATTCTCGCCTGCCACGCGGGAGGCCCGGGTTCGATTCCCGGCCAATGCACCA	74	)))))))..)))).......((((.))))).......(((((....))))).......((((((((((((.	GCATTGGTGGTTCAGTGGTAGAATTCTCGCA	tiRNA-5	31	31C>A	1472	1023	1261	1171	8181	7314	10194	8025	10204	7091	6108	8927	15059	15375.8	17414.5	14573.6	49777	45061.6	41218.9	40880.7	45764.6	44371.7	39878.3	44140.4	2.83439	1.16672e-05	0.000335961	-1.01598	0.78469	1	2.78981	1.10539e-06	0.000134748
AS-tDR-000011	-	-	chr17.trna1897-GlyGCC	1	31	GCATTGGTGGTTCAGTGGTAGAATTCTCGCCTGCCACGCGGGAGGCCCGGGTTCGATTCCCGGCCAATGCACCA	74	)))))))..)))).......((((.))))).......(((((....))))).......((((((((((((.	GCATTGGTGGTTCAGTGGTAGAATTCTCGCC	tiRNA-5	31	ExactMatch	3775	2342	2838	2642	21401	17776	25419	18449	23956	17800	15419	25093	38619.3	35200.6	39192.9	32880.7	130214	109518	102780	93982.3	107442	111383	100669	124075	2.99181	9.04354e-05	0.00124332	1.01621	0.853136	1	3.0403	6.80096e-06	0.000331032
AS-tDR-007238	-	-	chr17.trna1897-GlyGCC	1	31	GCATTGGTGGTTCAGTGGTAGAATTCTCGCCTGCCACGCGGGAGGCCCGGGTTCGATTCCCGGCCAATGCACCA	74	)))))))..)))).......((((.))))).......(((((....))))).......((((((((((((.	GCATTGGTGGTTCAGTGGTAGAATTCTCGCT	tiRNA-5	31	31C>T	4605	2980	3557	3243	24756	21737	28894	22442	30176	20613	17031	26546	47110.5	44789.8	49122.4	40360.4	150627	133922	116831	114323	135338	128985	111193	131259	2.84313	7.04432e-05	0.0011152	-1.01762	0.830553	1	2.79391	7.06057e-06	0.000331032
AS-tDR-008139	-	-	chr17.trna1897-GlyGCC	1	32	GCATTGGTGGTTCAGTGGTAGAATTCTCGCCTGCCACGCGGGAGGCCCGGGTTCGATTCCCGGCCAATGCACCA	74	)))))))..)))).......((((.))))).......(((((....))))).......((((((((((((.	GCATTGGTGGTTCAGTGGTAGAATTCTCGCCA	tiRNA-5	32	32T>A	1442	845	1427	1213	2031	2054	2705	4214	5567	2840	2255	3091	14752.1	12700.5	19707	15096.3	12357.5	12654.7	10937.5	21466.8	24967.8	17771.2	14722.6	15283.7	-1.08428	0.682821	0.710204	1.26696	0.297934	0.60396	1.16848	0.38214	0.401923
AS-tDR-001297	-	-	chr17.trna1897-GlyGCC	1	32	GCATTGGTGGTTCAGTGGTAGAATTCTCGCCTGCCACGCGGGAGGCCCGGGTTCGATTCCCGGCCAATGCACCA	74	)))))))..)))).......((((.))))).......(((((....))))).......((((((((((((.	GCATTGGTGGTTCAGTGGTAGAATTCTCGCCT	tiRNA-5	32	ExactMatch	8080	4446	7389	6219	11522	10805	14169	21180	29783	16305	12328	19390	82660.7	66824	102043	77397.9	70105.2	66569.7	57291.5	107894	133576	102028	80487.8	95875.7	-1.08966	0.630718	0.659011	1.36475	0.131445	0.399506	1.25246	0.171611	0.226401
AS-tDR-009271	-	-	chr17.trna1897-GlyGCC	1	51	GCATTGGTGGTTCAGTGGTAGAATTCTCGCCTGCCACGCGGGAGGCCCGGGTTCGATTCCCGGCCAATGCACCA	74	)))))))..)))).......((((.))))).......(((((....))))).......((((((((((((.	GCATTGGTGGTTCAGTGGTAGAATTCTCGCCTGCCACGCGGGAGGCCCGGG	tRF-5	51	ExactMatch	1179	682	1188	1213	918	1001	1827	1473	823	1225	1191	1762	12061.5	10250.6	16406.3	15096.3	5585.54	6167.17	7387.37	7503.71	3691.13	7665.4	7775.88	8712.38	-2.01963	0.00372133	0.0128244	1.04507	0.812241	1	-1.93253	0.0110563	0.0386673
AS-tDR-013629	-	-	chr17.trna1897-GlyGCC	3	35	GCATTGGTGGTTCAGTGGTAGAATTCTCGCCTGCCACGCGGGAGGCCCGGGTTCGATTCCCGGCCAATGCACCA	74	)))))))..)))).......((((.))))).......(((((....))))).......((((((((((((.	ATTGGTGGTTCAGTGGTAGAATTCTCGCCTGCT	i-tRF	33	33C>T	270	330	240	448	118	540	2829	270	401	213	128	130	2762.18	4959.94	3314.41	5575.54	717.967	3326.95	11438.9	1375.42	1798.47	1332.84	835.695	642.797	1.01488	0.981518	0.994297	-3.65495	0.263842	0.572963	-3.60138	0.00568061	0.0262757
AS-tDR-007217	-	-	chr19.trna1527-GlyGCC	1	30	GCATTGGTGGTTCAGTGGTAGAATTCTCGCCTGCCACGCGGGAGGCCCGGGTTCGATTCCCGGCCAATGCACCA	74	)))))))..)))).......((((.))))).......(((((....))))).......((((((((((((.	GCATTGTGGTTCAGTGGTAGAATTCTCGCC	tRF-5	30	6-G	422	291	288	320	2623	1890	2782	2005	3538	2164	2049	3408	4317.18	4373.77	3977.3	3982.53	15959.6	11644.3	11248.9	10213.8	15867.8	13541.2	13377.6	16851.2	2.94633	0.000701893	0.0048614	1.21543	0.135375	0.399506	3.58106	1.69507e-05	0.000659455
AS-tDR-007243	-	-	chr19.trna1527-GlyGCC	1	31	GCATTGGTGGTTCAGTGGTAGAATTCTCGCCTGCCACGCGGGAGGCCCGGGTTCGATTCCCGGCCAATGCACCA	74	)))))))..)))).......((((.))))).......(((((....))))).......((((((((((((.	GCATTGGTGGTTCAGTGGTAGAATTCTCGCA	tiRNA-5	31	31C>A	1472	1023	1261	1171	8181	7314	10194	8025	10204	7091	6108	8927	15059	15375.8	17414.5	14573.6	49777	45061.6	41218.9	40880.7	45764.6	44371.7	39878.3	44140.4	2.83439	1.16672e-05	0.000335961	-1.01598	0.78469	1	2.78981	1.10539e-06	0.000134748
AS-tDR-000011	-	-	chr19.trna1527-GlyGCC	1	31	GCATTGGTGGTTCAGTGGTAGAATTCTCGCCTGCCACGCGGGAGGCCCGGGTTCGATTCCCGGCCAATGCACCA	74	)))))))..)))).......((((.))))).......(((((....))))).......((((((((((((.	GCATTGGTGGTTCAGTGGTAGAATTCTCGCC	tiRNA-5	31	ExactMatch	3775	2342	2838	2642	21401	17776	25419	18449	23956	17800	15419	25093	38619.3	35200.6	39192.9	32880.7	130214	109518	102780	93982.3	107442	111383	100669	124075	2.99181	9.04354e-05	0.00124332	1.01621	0.853136	1	3.0403	6.80096e-06	0.000331032
AS-tDR-007238	-	-	chr19.trna1527-GlyGCC	1	31	GCATTGGTGGTTCAGTGGTAGAATTCTCGCCTGCCACGCGGGAGGCCCGGGTTCGATTCCCGGCCAATGCACCA	74	)))))))..)))).......((((.))))).......(((((....))))).......((((((((((((.	GCATTGGTGGTTCAGTGGTAGAATTCTCGCT	tiRNA-5	31	31C>T	4605	2980	3557	3243	24756	21737	28894	22442	30176	20613	17031	26546	47110.5	44789.8	49122.4	40360.4	150627	133922	116831	114323	135338	128985	111193	131259	2.84313	7.04432e-05	0.0011152	-1.01762	0.830553	1	2.79391	7.06057e-06	0.000331032
AS-tDR-008139	-	-	chr19.trna1527-GlyGCC	1	32	GCATTGGTGGTTCAGTGGTAGAATTCTCGCCTGCCACGCGGGAGGCCCGGGTTCGATTCCCGGCCAATGCACCA	74	)))))))..)))).......((((.))))).......(((((....))))).......((((((((((((.	GCATTGGTGGTTCAGTGGTAGAATTCTCGCCA	tiRNA-5	32	32T>A	1442	845	1427	1213	2031	2054	2705	4214	5567	2840	2255	3091	14752.1	12700.5	19707	15096.3	12357.5	12654.7	10937.5	21466.8	24967.8	17771.2	14722.6	15283.7	-1.08428	0.682821	0.710204	1.26696	0.297934	0.60396	1.16848	0.38214	0.401923
AS-tDR-001297	-	-	chr19.trna1527-GlyGCC	1	32	GCATTGGTGGTTCAGTGGTAGAATTCTCGCCTGCCACGCGGGAGGCCCGGGTTCGATTCCCGGCCAATGCACCA	74	)))))))..)))).......((((.))))).......(((((....))))).......((((((((((((.	GCATTGGTGGTTCAGTGGTAGAATTCTCGCCT	tiRNA-5	32	ExactMatch	8080	4446	7389	6219	11522	10805	14169	21180	29783	16305	12328	19390	82660.7	66824	102043	77397.9	70105.2	66569.7	57291.5	107894	133576	102028	80487.8	95875.7	-1.08966	0.630718	0.659011	1.36475	0.131445	0.399506	1.25246	0.171611	0.226401
AS-tDR-009271	-	-	chr19.trna1527-GlyGCC	1	51	GCATTGGTGGTTCAGTGGTAGAATTCTCGCCTGCCACGCGGGAGGCCCGGGTTCGATTCCCGGCCAATGCACCA	74	)))))))..)))).......((((.))))).......(((((....))))).......((((((((((((.	GCATTGGTGGTTCAGTGGTAGAATTCTCGCCTGCCACGCGGGAGGCCCGGG	tRF-5	51	ExactMatch	1179	682	1188	1213	918	1001	1827	1473	823	1225	1191	1762	12061.5	10250.6	16406.3	15096.3	5585.54	6167.17	7387.37	7503.71	3691.13	7665.4	7775.88	8712.38	-2.01963	0.00372133	0.0128244	1.04507	0.812241	1	-1.93253	0.0110563	0.0386673
AS-tDR-013629	-	-	chr19.trna1527-GlyGCC	3	35	GCATTGGTGGTTCAGTGGTAGAATTCTCGCCTGCCACGCGGGAGGCCCGGGTTCGATTCCCGGCCAATGCACCA	74	)))))))..)))).......((((.))))).......(((((....))))).......((((((((((((.	ATTGGTGGTTCAGTGGTAGAATTCTCGCCTGCT	i-tRF	33	33C>T	270	330	240	448	118	540	2829	270	401	213	128	130	2762.18	4959.94	3314.41	5575.54	717.967	3326.95	11438.9	1375.42	1798.47	1332.84	835.695	642.797	1.01488	0.981518	0.994297	-3.65495	0.263842	0.572963	-3.60138	0.00568061	0.0262757
AS-tDR-007217	-	-	chr19.trna1528-GlyGCC	1	30	GCATTGGTGGTTCAGTGGTAGAATTCTCGCCTGCCACGCGGGAGGCCCGGGTTCGATTCCCGGCCAATGCACCA	74	)))))))..)))).......((((.))))).......(((((....))))).......((((((((((((.	GCATTGTGGTTCAGTGGTAGAATTCTCGCC	tRF-5	30	6-G	422	291	288	320	2623	1890	2782	2005	3538	2164	2049	3408	4317.18	4373.77	3977.3	3982.53	15959.6	11644.3	11248.9	10213.8	15867.8	13541.2	13377.6	16851.2	2.94633	0.000701893	0.0048614	1.21543	0.135375	0.399506	3.58106	1.69507e-05	0.000659455
AS-tDR-007243	-	-	chr19.trna1528-GlyGCC	1	31	GCATTGGTGGTTCAGTGGTAGAATTCTCGCCTGCCACGCGGGAGGCCCGGGTTCGATTCCCGGCCAATGCACCA	74	)))))))..)))).......((((.))))).......(((((....))))).......((((((((((((.	GCATTGGTGGTTCAGTGGTAGAATTCTCGCA	tiRNA-5	31	31C>A	1472	1023	1261	1171	8181	7314	10194	8025	10204	7091	6108	8927	15059	15375.8	17414.5	14573.6	49777	45061.6	41218.9	40880.7	45764.6	44371.7	39878.3	44140.4	2.83439	1.16672e-05	0.000335961	-1.01598	0.78469	1	2.78981	1.10539e-06	0.000134748
AS-tDR-000011	-	-	chr19.trna1528-GlyGCC	1	31	GCATTGGTGGTTCAGTGGTAGAATTCTCGCCTGCCACGCGGGAGGCCCGGGTTCGATTCCCGGCCAATGCACCA	74	)))))))..)))).......((((.))))).......(((((....))))).......((((((((((((.	GCATTGGTGGTTCAGTGGTAGAATTCTCGCC	tiRNA-5	31	ExactMatch	3775	2342	2838	2642	21401	17776	25419	18449	23956	17800	15419	25093	38619.3	35200.6	39192.9	32880.7	130214	109518	102780	93982.3	107442	111383	100669	124075	2.99181	9.04354e-05	0.00124332	1.01621	0.853136	1	3.0403	6.80096e-06	0.000331032
AS-tDR-007238	-	-	chr19.trna1528-GlyGCC	1	31	GCATTGGTGGTTCAGTGGTAGAATTCTCGCCTGCCACGCGGGAGGCCCGGGTTCGATTCCCGGCCAATGCACCA	74	)))))))..)))).......((((.))))).......(((((....))))).......((((((((((((.	GCATTGGTGGTTCAGTGGTAGAATTCTCGCT	tiRNA-5	31	31C>T	4605	2980	3557	3243	24756	21737	28894	22442	30176	20613	17031	26546	47110.5	44789.8	49122.4	40360.4	150627	133922	116831	114323	135338	128985	111193	131259	2.84313	7.04432e-05	0.0011152	-1.01762	0.830553	1	2.79391	7.06057e-06	0.000331032
AS-tDR-008139	-	-	chr19.trna1528-GlyGCC	1	32	GCATTGGTGGTTCAGTGGTAGAATTCTCGCCTGCCACGCGGGAGGCCCGGGTTCGATTCCCGGCCAATGCACCA	74	)))))))..)))).......((((.))))).......(((((....))))).......((((((((((((.	GCATTGGTGGTTCAGTGGTAGAATTCTCGCCA	tiRNA-5	32	32T>A	1442	845	1427	1213	2031	2054	2705	4214	5567	2840	2255	3091	14752.1	12700.5	19707	15096.3	12357.5	12654.7	10937.5	21466.8	24967.8	17771.2	14722.6	15283.7	-1.08428	0.682821	0.710204	1.26696	0.297934	0.60396	1.16848	0.38214	0.401923
AS-tDR-001297	-	-	chr19.trna1528-GlyGCC	1	32	GCATTGGTGGTTCAGTGGTAGAATTCTCGCCTGCCACGCGGGAGGCCCGGGTTCGATTCCCGGCCAATGCACCA	74	)))))))..)))).......((((.))))).......(((((....))))).......((((((((((((.	GCATTGGTGGTTCAGTGGTAGAATTCTCGCCT	tiRNA-5	32	ExactMatch	8080	4446	7389	6219	11522	10805	14169	21180	29783	16305	12328	19390	82660.7	66824	102043	77397.9	70105.2	66569.7	57291.5	107894	133576	102028	80487.8	95875.7	-1.08966	0.630718	0.659011	1.36475	0.131445	0.399506	1.25246	0.171611	0.226401
AS-tDR-009271	-	-	chr19.trna1528-GlyGCC	1	51	GCATTGGTGGTTCAGTGGTAGAATTCTCGCCTGCCACGCGGGAGGCCCGGGTTCGATTCCCGGCCAATGCACCA	74	)))))))..)))).......((((.))))).......(((((....))))).......((((((((((((.	GCATTGGTGGTTCAGTGGTAGAATTCTCGCCTGCCACGCGGGAGGCCCGGG	tRF-5	51	ExactMatch	1179	682	1188	1213	918	1001	1827	1473	823	1225	1191	1762	12061.5	10250.6	16406.3	15096.3	5585.54	6167.17	7387.37	7503.71	3691.13	7665.4	7775.88	8712.38	-2.01963	0.00372133	0.0128244	1.04507	0.812241	1	-1.93253	0.0110563	0.0386673
AS-tDR-013629	-	-	chr19.trna1528-GlyGCC	3	35	GCATTGGTGGTTCAGTGGTAGAATTCTCGCCTGCCACGCGGGAGGCCCGGGTTCGATTCCCGGCCAATGCACCA	74	)))))))..)))).......((((.))))).......(((((....))))).......((((((((((((.	ATTGGTGGTTCAGTGGTAGAATTCTCGCCTGCT	i-tRF	33	33C>T	270	330	240	448	118	540	2829	270	401	213	128	130	2762.18	4959.94	3314.41	5575.54	717.967	3326.95	11438.9	1375.42	1798.47	1332.84	835.695	642.797	1.01488	0.981518	0.994297	-3.65495	0.263842	0.572963	-3.60138	0.00568061	0.0262757
AS-tDR-007217	-	-	chr19.trna3490-GlyGCC	1	30	GCATTGGTGGTTCAGTGGTAGAATTCTCGCCTGCCACGCGGGAGGCCCGGGTTCGATTCCCGGCCAATGCACCA	74	)))))))..)))).......((((.))))).......(((((....))))).......((((((((((((.	GCATTGTGGTTCAGTGGTAGAATTCTCGCC	tRF-5	30	6-G	422	291	288	320	2623	1890	2782	2005	3538	2164	2049	3408	4317.18	4373.77	3977.3	3982.53	15959.6	11644.3	11248.9	10213.8	15867.8	13541.2	13377.6	16851.2	2.94633	0.000701893	0.0048614	1.21543	0.135375	0.399506	3.58106	1.69507e-05	0.000659455
AS-tDR-007243	-	-	chr19.trna3490-GlyGCC	1	31	GCATTGGTGGTTCAGTGGTAGAATTCTCGCCTGCCACGCGGGAGGCCCGGGTTCGATTCCCGGCCAATGCACCA	74	)))))))..)))).......((((.))))).......(((((....))))).......((((((((((((.	GCATTGGTGGTTCAGTGGTAGAATTCTCGCA	tiRNA-5	31	31C>A	1472	1023	1261	1171	8181	7314	10194	8025	10204	7091	6108	8927	15059	15375.8	17414.5	14573.6	49777	45061.6	41218.9	40880.7	45764.6	44371.7	39878.3	44140.4	2.83439	1.16672e-05	0.000335961	-1.01598	0.78469	1	2.78981	1.10539e-06	0.000134748
AS-tDR-000011	-	-	chr19.trna3490-GlyGCC	1	31	GCATTGGTGGTTCAGTGGTAGAATTCTCGCCTGCCACGCGGGAGGCCCGGGTTCGATTCCCGGCCAATGCACCA	74	)))))))..)))).......((((.))))).......(((((....))))).......((((((((((((.	GCATTGGTGGTTCAGTGGTAGAATTCTCGCC	tiRNA-5	31	ExactMatch	3775	2342	2838	2642	21401	17776	25419	18449	23956	17800	15419	25093	38619.3	35200.6	39192.9	32880.7	130214	109518	102780	93982.3	107442	111383	100669	124075	2.99181	9.04354e-05	0.00124332	1.01621	0.853136	1	3.0403	6.80096e-06	0.000331032
AS-tDR-007238	-	-	chr19.trna3490-GlyGCC	1	31	GCATTGGTGGTTCAGTGGTAGAATTCTCGCCTGCCACGCGGGAGGCCCGGGTTCGATTCCCGGCCAATGCACCA	74	)))))))..)))).......((((.))))).......(((((....))))).......((((((((((((.	GCATTGGTGGTTCAGTGGTAGAATTCTCGCT	tiRNA-5	31	31C>T	4605	2980	3557	3243	24756	21737	28894	22442	30176	20613	17031	26546	47110.5	44789.8	49122.4	40360.4	150627	133922	116831	114323	135338	128985	111193	131259	2.84313	7.04432e-05	0.0011152	-1.01762	0.830553	1	2.79391	7.06057e-06	0.000331032
AS-tDR-008139	-	-	chr19.trna3490-GlyGCC	1	32	GCATTGGTGGTTCAGTGGTAGAATTCTCGCCTGCCACGCGGGAGGCCCGGGTTCGATTCCCGGCCAATGCACCA	74	)))))))..)))).......((((.))))).......(((((....))))).......((((((((((((.	GCATTGGTGGTTCAGTGGTAGAATTCTCGCCA	tiRNA-5	32	32T>A	1442	845	1427	1213	2031	2054	2705	4214	5567	2840	2255	3091	14752.1	12700.5	19707	15096.3	12357.5	12654.7	10937.5	21466.8	24967.8	17771.2	14722.6	15283.7	-1.08428	0.682821	0.710204	1.26696	0.297934	0.60396	1.16848	0.38214	0.401923
AS-tDR-001297	-	-	chr19.trna3490-GlyGCC	1	32	GCATTGGTGGTTCAGTGGTAGAATTCTCGCCTGCCACGCGGGAGGCCCGGGTTCGATTCCCGGCCAATGCACCA	74	)))))))..)))).......((((.))))).......(((((....))))).......((((((((((((.	GCATTGGTGGTTCAGTGGTAGAATTCTCGCCT	tiRNA-5	32	ExactMatch	8080	4446	7389	6219	11522	10805	14169	21180	29783	16305	12328	19390	82660.7	66824	102043	77397.9	70105.2	66569.7	57291.5	107894	133576	102028	80487.8	95875.7	-1.08966	0.630718	0.659011	1.36475	0.131445	0.399506	1.25246	0.171611	0.226401
AS-tDR-009271	-	-	chr19.trna3490-GlyGCC	1	51	GCATTGGTGGTTCAGTGGTAGAATTCTCGCCTGCCACGCGGGAGGCCCGGGTTCGATTCCCGGCCAATGCACCA	74	)))))))..)))).......((((.))))).......(((((....))))).......((((((((((((.	GCATTGGTGGTTCAGTGGTAGAATTCTCGCCTGCCACGCGGGAGGCCCGGG	tRF-5	51	ExactMatch	1179	682	1188	1213	918	1001	1827	1473	823	1225	1191	1762	12061.5	10250.6	16406.3	15096.3	5585.54	6167.17	7387.37	7503.71	3691.13	7665.4	7775.88	8712.38	-2.01963	0.00372133	0.0128244	1.04507	0.812241	1	-1.93253	0.0110563	0.0386673
AS-tDR-013629	-	-	chr19.trna3490-GlyGCC	3	35	GCATTGGTGGTTCAGTGGTAGAATTCTCGCCTGCCACGCGGGAGGCCCGGGTTCGATTCCCGGCCAATGCACCA	74	)))))))..)))).......((((.))))).......(((((....))))).......((((((((((((.	ATTGGTGGTTCAGTGGTAGAATTCTCGCCTGCT	i-tRF	33	33C>T	270	330	240	448	118	540	2829	270	401	213	128	130	2762.18	4959.94	3314.41	5575.54	717.967	3326.95	11438.9	1375.42	1798.47	1332.84	835.695	642.797	1.01488	0.981518	0.994297	-3.65495	0.263842	0.572963	-3.60138	0.00568061	0.0262757
AS-tDR-007217	-	-	chr3.trna10899-GlyGCC	1	30	GCATTGGTGGTTCAGTGGTAGAATTCTCGCCTGCCACGCGGGAGGCCCGGGTTCGATTCCCGGCCAATGCACCA	74	)))))))..)))).......((((.))))).......(((((....))))).......((((((((((((.	GCATTGTGGTTCAGTGGTAGAATTCTCGCC	tRF-5	30	6-G	422	291	288	320	2623	1890	2782	2005	3538	2164	2049	3408	4317.18	4373.77	3977.3	3982.53	15959.6	11644.3	11248.9	10213.8	15867.8	13541.2	13377.6	16851.2	2.94633	0.000701893	0.0048614	1.21543	0.135375	0.399506	3.58106	1.69507e-05	0.000659455
AS-tDR-007243	-	-	chr3.trna10899-GlyGCC	1	31	GCATTGGTGGTTCAGTGGTAGAATTCTCGCCTGCCACGCGGGAGGCCCGGGTTCGATTCCCGGCCAATGCACCA	74	)))))))..)))).......((((.))))).......(((((....))))).......((((((((((((.	GCATTGGTGGTTCAGTGGTAGAATTCTCGCA	tiRNA-5	31	31C>A	1472	1023	1261	1171	8181	7314	10194	8025	10204	7091	6108	8927	15059	15375.8	17414.5	14573.6	49777	45061.6	41218.9	40880.7	45764.6	44371.7	39878.3	44140.4	2.83439	1.16672e-05	0.000335961	-1.01598	0.78469	1	2.78981	1.10539e-06	0.000134748
AS-tDR-000011	-	-	chr3.trna10899-GlyGCC	1	31	GCATTGGTGGTTCAGTGGTAGAATTCTCGCCTGCCACGCGGGAGGCCCGGGTTCGATTCCCGGCCAATGCACCA	74	)))))))..)))).......((((.))))).......(((((....))))).......((((((((((((.	GCATTGGTGGTTCAGTGGTAGAATTCTCGCC	tiRNA-5	31	ExactMatch	3775	2342	2838	2642	21401	17776	25419	18449	23956	17800	15419	25093	38619.3	35200.6	39192.9	32880.7	130214	109518	102780	93982.3	107442	111383	100669	124075	2.99181	9.04354e-05	0.00124332	1.01621	0.853136	1	3.0403	6.80096e-06	0.000331032
AS-tDR-007238	-	-	chr3.trna10899-GlyGCC	1	31	GCATTGGTGGTTCAGTGGTAGAATTCTCGCCTGCCACGCGGGAGGCCCGGGTTCGATTCCCGGCCAATGCACCA	74	)))))))..)))).......((((.))))).......(((((....))))).......((((((((((((.	GCATTGGTGGTTCAGTGGTAGAATTCTCGCT	tiRNA-5	31	31C>T	4605	2980	3557	3243	24756	21737	28894	22442	30176	20613	17031	26546	47110.5	44789.8	49122.4	40360.4	150627	133922	116831	114323	135338	128985	111193	131259	2.84313	7.04432e-05	0.0011152	-1.01762	0.830553	1	2.79391	7.06057e-06	0.000331032
AS-tDR-008139	-	-	chr3.trna10899-GlyGCC	1	32	GCATTGGTGGTTCAGTGGTAGAATTCTCGCCTGCCACGCGGGAGGCCCGGGTTCGATTCCCGGCCAATGCACCA	74	)))))))..)))).......((((.))))).......(((((....))))).......((((((((((((.	GCATTGGTGGTTCAGTGGTAGAATTCTCGCCA	tiRNA-5	32	32T>A	1442	845	1427	1213	2031	2054	2705	4214	5567	2840	2255	3091	14752.1	12700.5	19707	15096.3	12357.5	12654.7	10937.5	21466.8	24967.8	17771.2	14722.6	15283.7	-1.08428	0.682821	0.710204	1.26696	0.297934	0.60396	1.16848	0.38214	0.401923
AS-tDR-001297	-	-	chr3.trna10899-GlyGCC	1	32	GCATTGGTGGTTCAGTGGTAGAATTCTCGCCTGCCACGCGGGAGGCCCGGGTTCGATTCCCGGCCAATGCACCA	74	)))))))..)))).......((((.))))).......(((((....))))).......((((((((((((.	GCATTGGTGGTTCAGTGGTAGAATTCTCGCCT	tiRNA-5	32	ExactMatch	8080	4446	7389	6219	11522	10805	14169	21180	29783	16305	12328	19390	82660.7	66824	102043	77397.9	70105.2	66569.7	57291.5	107894	133576	102028	80487.8	95875.7	-1.08966	0.630718	0.659011	1.36475	0.131445	0.399506	1.25246	0.171611	0.226401
AS-tDR-009271	-	-	chr3.trna10899-GlyGCC	1	51	GCATTGGTGGTTCAGTGGTAGAATTCTCGCCTGCCACGCGGGAGGCCCGGGTTCGATTCCCGGCCAATGCACCA	74	)))))))..)))).......((((.))))).......(((((....))))).......((((((((((((.	GCATTGGTGGTTCAGTGGTAGAATTCTCGCCTGCCACGCGGGAGGCCCGGG	tRF-5	51	ExactMatch	1179	682	1188	1213	918	1001	1827	1473	823	1225	1191	1762	12061.5	10250.6	16406.3	15096.3	5585.54	6167.17	7387.37	7503.71	3691.13	7665.4	7775.88	8712.38	-2.01963	0.00372133	0.0128244	1.04507	0.812241	1	-1.93253	0.0110563	0.0386673
AS-tDR-013629	-	-	chr3.trna10899-GlyGCC	3	35	GCATTGGTGGTTCAGTGGTAGAATTCTCGCCTGCCACGCGGGAGGCCCGGGTTCGATTCCCGGCCAATGCACCA	74	)))))))..)))).......((((.))))).......(((((....))))).......((((((((((((.	ATTGGTGGTTCAGTGGTAGAATTCTCGCCTGCT	i-tRF	33	33C>T	270	330	240	448	118	540	2829	270	401	213	128	130	2762.18	4959.94	3314.41	5575.54	717.967	3326.95	11438.9	1375.42	1798.47	1332.84	835.695	642.797	1.01488	0.981518	0.994297	-3.65495	0.263842	0.572963	-3.60138	0.00568061	0.0262757
AS-tDR-007217	-	-	pre-chr13.trna2238-GlyGCC	41	70	TAAACTGAAATAAGACTGTTGCAACCTCACCTTCCGCCAGGCATTGGTGGTTCAGTGGTAGAATTCTCGCCTGCCACGCGGGAGGCCCGGGTTCGATTCCCGGCCAATGCACGCTGTCCTTTTTTTCAAATTGTGTGTCCTGTATATCTTT	151	.....(((((...(((.((((((.((((.((..(((((((...)))))))....(((((((.........)))))))..)))))).(((((.......)))))....)))).)).))).....))))).......................	GCATTGTGGTTCAGTGGTAGAATTCTCGCC	Other	30	6-G	422	291	288	320	2623	1890	2782	2005	3538	2164	2049	3408	4317.18	4373.77	3977.3	3982.53	15959.6	11644.3	11248.9	10213.8	15867.8	13541.2	13377.6	16851.2	2.94633	0.000701893	0.0048614	1.21543	0.135375	0.399506	3.58106	1.69507e-05	0.000659455
AS-tDR-007243	-	-	pre-chr13.trna2238-GlyGCC	41	71	TAAACTGAAATAAGACTGTTGCAACCTCACCTTCCGCCAGGCATTGGTGGTTCAGTGGTAGAATTCTCGCCTGCCACGCGGGAGGCCCGGGTTCGATTCCCGGCCAATGCACGCTGTCCTTTTTTTCAAATTGTGTGTCCTGTATATCTTT	151	.....(((((...(((.((((((.((((.((..(((((((...)))))))....(((((((.........)))))))..)))))).(((((.......)))))....)))).)).))).....))))).......................	GCATTGGTGGTTCAGTGGTAGAATTCTCGCA	Other	31	31C>A	1472	1023	1261	1171	8181	7314	10194	8025	10204	7091	6108	8927	15059	15375.8	17414.5	14573.6	49777	45061.6	41218.9	40880.7	45764.6	44371.7	39878.3	44140.4	2.83439	1.16672e-05	0.000335961	-1.01598	0.78469	1	2.78981	1.10539e-06	0.000134748
AS-tDR-000011	-	-	pre-chr13.trna2238-GlyGCC	41	71	TAAACTGAAATAAGACTGTTGCAACCTCACCTTCCGCCAGGCATTGGTGGTTCAGTGGTAGAATTCTCGCCTGCCACGCGGGAGGCCCGGGTTCGATTCCCGGCCAATGCACGCTGTCCTTTTTTTCAAATTGTGTGTCCTGTATATCTTT	151	.....(((((...(((.((((((.((((.((..(((((((...)))))))....(((((((.........)))))))..)))))).(((((.......)))))....)))).)).))).....))))).......................	GCATTGGTGGTTCAGTGGTAGAATTCTCGCC	Other	31	ExactMatch	3775	2342	2838	2642	21401	17776	25419	18449	23956	17800	15419	25093	38619.3	35200.6	39192.9	32880.7	130214	109518	102780	93982.3	107442	111383	100669	124075	2.99181	9.04354e-05	0.00124332	1.01621	0.853136	1	3.0403	6.80096e-06	0.000331032
AS-tDR-007238	-	-	pre-chr13.trna2238-GlyGCC	41	71	TAAACTGAAATAAGACTGTTGCAACCTCACCTTCCGCCAGGCATTGGTGGTTCAGTGGTAGAATTCTCGCCTGCCACGCGGGAGGCCCGGGTTCGATTCCCGGCCAATGCACGCTGTCCTTTTTTTCAAATTGTGTGTCCTGTATATCTTT	151	.....(((((...(((.((((((.((((.((..(((((((...)))))))....(((((((.........)))))))..)))))).(((((.......)))))....)))).)).))).....))))).......................	GCATTGGTGGTTCAGTGGTAGAATTCTCGCT	Other	31	31C>T	4605	2980	3557	3243	24756	21737	28894	22442	30176	20613	17031	26546	47110.5	44789.8	49122.4	40360.4	150627	133922	116831	114323	135338	128985	111193	131259	2.84313	7.04432e-05	0.0011152	-1.01762	0.830553	1	2.79391	7.06057e-06	0.000331032
AS-tDR-008139	-	-	pre-chr13.trna2238-GlyGCC	41	72	TAAACTGAAATAAGACTGTTGCAACCTCACCTTCCGCCAGGCATTGGTGGTTCAGTGGTAGAATTCTCGCCTGCCACGCGGGAGGCCCGGGTTCGATTCCCGGCCAATGCACGCTGTCCTTTTTTTCAAATTGTGTGTCCTGTATATCTTT	151	.....(((((...(((.((((((.((((.((..(((((((...)))))))....(((((((.........)))))))..)))))).(((((.......)))))....)))).)).))).....))))).......................	GCATTGGTGGTTCAGTGGTAGAATTCTCGCCA	Other	32	32T>A	1442	845	1427	1213	2031	2054	2705	4214	5567	2840	2255	3091	14752.1	12700.5	19707	15096.3	12357.5	12654.7	10937.5	21466.8	24967.8	17771.2	14722.6	15283.7	-1.08428	0.682821	0.710204	1.26696	0.297934	0.60396	1.16848	0.38214	0.401923
AS-tDR-001297	-	-	pre-chr13.trna2238-GlyGCC	41	72	TAAACTGAAATAAGACTGTTGCAACCTCACCTTCCGCCAGGCATTGGTGGTTCAGTGGTAGAATTCTCGCCTGCCACGCGGGAGGCCCGGGTTCGATTCCCGGCCAATGCACGCTGTCCTTTTTTTCAAATTGTGTGTCCTGTATATCTTT	151	.....(((((...(((.((((((.((((.((..(((((((...)))))))....(((((((.........)))))))..)))))).(((((.......)))))....)))).)).))).....))))).......................	GCATTGGTGGTTCAGTGGTAGAATTCTCGCCT	Other	32	ExactMatch	8080	4446	7389	6219	11522	10805	14169	21180	29783	16305	12328	19390	82660.7	66824	102043	77397.9	70105.2	66569.7	57291.5	107894	133576	102028	80487.8	95875.7	-1.08966	0.630718	0.659011	1.36475	0.131445	0.399506	1.25246	0.171611	0.226401
AS-tDR-009271	-	-	pre-chr13.trna2238-GlyGCC	41	91	TAAACTGAAATAAGACTGTTGCAACCTCACCTTCCGCCAGGCATTGGTGGTTCAGTGGTAGAATTCTCGCCTGCCACGCGGGAGGCCCGGGTTCGATTCCCGGCCAATGCACGCTGTCCTTTTTTTCAAATTGTGTGTCCTGTATATCTTT	151	.....(((((...(((.((((((.((((.((..(((((((...)))))))....(((((((.........)))))))..)))))).(((((.......)))))....)))).)).))).....))))).......................	GCATTGGTGGTTCAGTGGTAGAATTCTCGCCTGCCACGCGGGAGGCCCGGG	Other	51	ExactMatch	1179	682	1188	1213	918	1001	1827	1473	823	1225	1191	1762	12061.5	10250.6	16406.3	15096.3	5585.54	6167.17	7387.37	7503.71	3691.13	7665.4	7775.88	8712.38	-2.01963	0.00372133	0.0128244	1.04507	0.812241	1	-1.93253	0.0110563	0.0386673
AS-tDR-013629	-	-	pre-chr13.trna2238-GlyGCC	43	75	TAAACTGAAATAAGACTGTTGCAACCTCACCTTCCGCCAGGCATTGGTGGTTCAGTGGTAGAATTCTCGCCTGCCACGCGGGAGGCCCGGGTTCGATTCCCGGCCAATGCACGCTGTCCTTTTTTTCAAATTGTGTGTCCTGTATATCTTT	151	.....(((((...(((.((((((.((((.((..(((((((...)))))))....(((((((.........)))))))..)))))).(((((.......)))))....)))).)).))).....))))).......................	ATTGGTGGTTCAGTGGTAGAATTCTCGCCTGCT	Other	33	33C>T	270	330	240	448	118	540	2829	270	401	213	128	130	2762.18	4959.94	3314.41	5575.54	717.967	3326.95	11438.9	1375.42	1798.47	1332.84	835.695	642.797	1.01488	0.981518	0.994297	-3.65495	0.263842	0.572963	-3.60138	0.00568061	0.0262757
AS-tDR-007217	-	-	pre-chr19.trna1528-GlyGCC	41	70	GAGGTTATAGGGAGGTGCCACACAGCTGCTCACAGCTGGAGCATTGGTGGTTCAGTGGTAGAATTCTCGCCTGCCACGCGGGAGGCCCGGGTTCGATTCCCGGCCAATGCAGTAGCAATATTTTTAATTCCAAGAGATGAAAATTTCATAC	151	..((...((((((..(((.((.((((((....))))))..((((((((......(((((((.........))))))).((((((...((....)).)))))))))))))).)).)))...))))))...))..(((((....)))))....	GCATTGTGGTTCAGTGGTAGAATTCTCGCC	Other	30	6-G	422	291	288	320	2623	1890	2782	2005	3538	2164	2049	3408	4317.18	4373.77	3977.3	3982.53	15959.6	11644.3	11248.9	10213.8	15867.8	13541.2	13377.6	16851.2	2.94633	0.000701893	0.0048614	1.21543	0.135375	0.399506	3.58106	1.69507e-05	0.000659455
AS-tDR-007243	-	-	pre-chr19.trna1528-GlyGCC	41	71	GAGGTTATAGGGAGGTGCCACACAGCTGCTCACAGCTGGAGCATTGGTGGTTCAGTGGTAGAATTCTCGCCTGCCACGCGGGAGGCCCGGGTTCGATTCCCGGCCAATGCAGTAGCAATATTTTTAATTCCAAGAGATGAAAATTTCATAC	151	..((...((((((..(((.((.((((((....))))))..((((((((......(((((((.........))))))).((((((...((....)).)))))))))))))).)).)))...))))))...))..(((((....)))))....	GCATTGGTGGTTCAGTGGTAGAATTCTCGCA	Other	31	31C>A	1472	1023	1261	1171	8181	7314	10194	8025	10204	7091	6108	8927	15059	15375.8	17414.5	14573.6	49777	45061.6	41218.9	40880.7	45764.6	44371.7	39878.3	44140.4	2.83439	1.16672e-05	0.000335961	-1.01598	0.78469	1	2.78981	1.10539e-06	0.000134748
AS-tDR-000011	-	-	pre-chr19.trna1528-GlyGCC	41	71	GAGGTTATAGGGAGGTGCCACACAGCTGCTCACAGCTGGAGCATTGGTGGTTCAGTGGTAGAATTCTCGCCTGCCACGCGGGAGGCCCGGGTTCGATTCCCGGCCAATGCAGTAGCAATATTTTTAATTCCAAGAGATGAAAATTTCATAC	151	..((...((((((..(((.((.((((((....))))))..((((((((......(((((((.........))))))).((((((...((....)).)))))))))))))).)).)))...))))))...))..(((((....)))))....	GCATTGGTGGTTCAGTGGTAGAATTCTCGCC	Other	31	ExactMatch	3775	2342	2838	2642	21401	17776	25419	18449	23956	17800	15419	25093	38619.3	35200.6	39192.9	32880.7	130214	109518	102780	93982.3	107442	111383	100669	124075	2.99181	9.04354e-05	0.00124332	1.01621	0.853136	1	3.0403	6.80096e-06	0.000331032
AS-tDR-007238	-	-	pre-chr19.trna1528-GlyGCC	41	71	GAGGTTATAGGGAGGTGCCACACAGCTGCTCACAGCTGGAGCATTGGTGGTTCAGTGGTAGAATTCTCGCCTGCCACGCGGGAGGCCCGGGTTCGATTCCCGGCCAATGCAGTAGCAATATTTTTAATTCCAAGAGATGAAAATTTCATAC	151	..((...((((((..(((.((.((((((....))))))..((((((((......(((((((.........))))))).((((((...((....)).)))))))))))))).)).)))...))))))...))..(((((....)))))....	GCATTGGTGGTTCAGTGGTAGAATTCTCGCT	Other	31	31C>T	4605	2980	3557	3243	24756	21737	28894	22442	30176	20613	17031	26546	47110.5	44789.8	49122.4	40360.4	150627	133922	116831	114323	135338	128985	111193	131259	2.84313	7.04432e-05	0.0011152	-1.01762	0.830553	1	2.79391	7.06057e-06	0.000331032
AS-tDR-008139	-	-	pre-chr19.trna1528-GlyGCC	41	72	GAGGTTATAGGGAGGTGCCACACAGCTGCTCACAGCTGGAGCATTGGTGGTTCAGTGGTAGAATTCTCGCCTGCCACGCGGGAGGCCCGGGTTCGATTCCCGGCCAATGCAGTAGCAATATTTTTAATTCCAAGAGATGAAAATTTCATAC	151	..((...((((((..(((.((.((((((....))))))..((((((((......(((((((.........))))))).((((((...((....)).)))))))))))))).)).)))...))))))...))..(((((....)))))....	GCATTGGTGGTTCAGTGGTAGAATTCTCGCCA	Other	32	32T>A	1442	845	1427	1213	2031	2054	2705	4214	5567	2840	2255	3091	14752.1	12700.5	19707	15096.3	12357.5	12654.7	10937.5	21466.8	24967.8	17771.2	14722.6	15283.7	-1.08428	0.682821	0.710204	1.26696	0.297934	0.60396	1.16848	0.38214	0.401923
AS-tDR-001297	-	-	pre-chr19.trna1528-GlyGCC	41	72	GAGGTTATAGGGAGGTGCCACACAGCTGCTCACAGCTGGAGCATTGGTGGTTCAGTGGTAGAATTCTCGCCTGCCACGCGGGAGGCCCGGGTTCGATTCCCGGCCAATGCAGTAGCAATATTTTTAATTCCAAGAGATGAAAATTTCATAC	151	..((...((((((..(((.((.((((((....))))))..((((((((......(((((((.........))))))).((((((...((....)).)))))))))))))).)).)))...))))))...))..(((((....)))))....	GCATTGGTGGTTCAGTGGTAGAATTCTCGCCT	Other	32	ExactMatch	8080	4446	7389	6219	11522	10805	14169	21180	29783	16305	12328	19390	82660.7	66824	102043	77397.9	70105.2	66569.7	57291.5	107894	133576	102028	80487.8	95875.7	-1.08966	0.630718	0.659011	1.36475	0.131445	0.399506	1.25246	0.171611	0.226401
AS-tDR-009271	-	-	pre-chr19.trna1528-GlyGCC	41	91	GAGGTTATAGGGAGGTGCCACACAGCTGCTCACAGCTGGAGCATTGGTGGTTCAGTGGTAGAATTCTCGCCTGCCACGCGGGAGGCCCGGGTTCGATTCCCGGCCAATGCAGTAGCAATATTTTTAATTCCAAGAGATGAAAATTTCATAC	151	..((...((((((..(((.((.((((((....))))))..((((((((......(((((((.........))))))).((((((...((....)).)))))))))))))).)).)))...))))))...))..(((((....)))))....	GCATTGGTGGTTCAGTGGTAGAATTCTCGCCTGCCACGCGGGAGGCCCGGG	Other	51	ExactMatch	1179	682	1188	1213	918	1001	1827	1473	823	1225	1191	1762	12061.5	10250.6	16406.3	15096.3	5585.54	6167.17	7387.37	7503.71	3691.13	7665.4	7775.88	8712.38	-2.01963	0.00372133	0.0128244	1.04507	0.812241	1	-1.93253	0.0110563	0.0386673
AS-tDR-013629	-	-	pre-chr19.trna1528-GlyGCC	43	75	GAGGTTATAGGGAGGTGCCACACAGCTGCTCACAGCTGGAGCATTGGTGGTTCAGTGGTAGAATTCTCGCCTGCCACGCGGGAGGCCCGGGTTCGATTCCCGGCCAATGCAGTAGCAATATTTTTAATTCCAAGAGATGAAAATTTCATAC	151	..((...((((((..(((.((.((((((....))))))..((((((((......(((((((.........))))))).((((((...((....)).)))))))))))))).)).)))...))))))...))..(((((....)))))....	ATTGGTGGTTCAGTGGTAGAATTCTCGCCTGCT	Other	33	33C>T	270	330	240	448	118	540	2829	270	401	213	128	130	2762.18	4959.94	3314.41	5575.54	717.967	3326.95	11438.9	1375.42	1798.47	1332.84	835.695	642.797	1.01488	0.981518	0.994297	-3.65495	0.263842	0.572963	-3.60138	0.00568061	0.0262757
AS-tDR-007217	-	-	pre-chr19.trna3490-GlyGCC	41	70	GAAACTAAATCCAACTAGCAAAGACTGTTTCTACAGCCAAGCATTGGTGGTTCAGTGGTAGAATTCTCGCCTGCCACGCGGGAGGCCCGGGTTCGATTCCCGGCCAATGCACGGTCTCTTTTTCTTAAATACTTTGCTCAAGAAGTCAGGA	151	.........(((.((((((((((.((((....))))((..((((((((......(((((((.........))))))).((((((...((....)).))))))))))))))..)).................))))))).....)))..)))	GCATTGTGGTTCAGTGGTAGAATTCTCGCC	Other	30	6-G	422	291	288	320	2623	1890	2782	2005	3538	2164	2049	3408	4317.18	4373.77	3977.3	3982.53	15959.6	11644.3	11248.9	10213.8	15867.8	13541.2	13377.6	16851.2	2.94633	0.000701893	0.0048614	1.21543	0.135375	0.399506	3.58106	1.69507e-05	0.000659455
AS-tDR-007243	-	-	pre-chr19.trna3490-GlyGCC	41	71	GAAACTAAATCCAACTAGCAAAGACTGTTTCTACAGCCAAGCATTGGTGGTTCAGTGGTAGAATTCTCGCCTGCCACGCGGGAGGCCCGGGTTCGATTCCCGGCCAATGCACGGTCTCTTTTTCTTAAATACTTTGCTCAAGAAGTCAGGA	151	.........(((.((((((((((.((((....))))((..((((((((......(((((((.........))))))).((((((...((....)).))))))))))))))..)).................))))))).....)))..)))	GCATTGGTGGTTCAGTGGTAGAATTCTCGCA	Other	31	31C>A	1472	1023	1261	1171	8181	7314	10194	8025	10204	7091	6108	8927	15059	15375.8	17414.5	14573.6	49777	45061.6	41218.9	40880.7	45764.6	44371.7	39878.3	44140.4	2.83439	1.16672e-05	0.000335961	-1.01598	0.78469	1	2.78981	1.10539e-06	0.000134748
AS-tDR-000011	-	-	pre-chr19.trna3490-GlyGCC	41	71	GAAACTAAATCCAACTAGCAAAGACTGTTTCTACAGCCAAGCATTGGTGGTTCAGTGGTAGAATTCTCGCCTGCCACGCGGGAGGCCCGGGTTCGATTCCCGGCCAATGCACGGTCTCTTTTTCTTAAATACTTTGCTCAAGAAGTCAGGA	151	.........(((.((((((((((.((((....))))((..((((((((......(((((((.........))))))).((((((...((....)).))))))))))))))..)).................))))))).....)))..)))	GCATTGGTGGTTCAGTGGTAGAATTCTCGCC	Other	31	ExactMatch	3775	2342	2838	2642	21401	17776	25419	18449	23956	17800	15419	25093	38619.3	35200.6	39192.9	32880.7	130214	109518	102780	93982.3	107442	111383	100669	124075	2.99181	9.04354e-05	0.00124332	1.01621	0.853136	1	3.0403	6.80096e-06	0.000331032
AS-tDR-007238	-	-	pre-chr19.trna3490-GlyGCC	41	71	GAAACTAAATCCAACTAGCAAAGACTGTTTCTACAGCCAAGCATTGGTGGTTCAGTGGTAGAATTCTCGCCTGCCACGCGGGAGGCCCGGGTTCGATTCCCGGCCAATGCACGGTCTCTTTTTCTTAAATACTTTGCTCAAGAAGTCAGGA	151	.........(((.((((((((((.((((....))))((..((((((((......(((((((.........))))))).((((((...((....)).))))))))))))))..)).................))))))).....)))..)))	GCATTGGTGGTTCAGTGGTAGAATTCTCGCT	Other	31	31C>T	4605	2980	3557	3243	24756	21737	28894	22442	30176	20613	17031	26546	47110.5	44789.8	49122.4	40360.4	150627	133922	116831	114323	135338	128985	111193	131259	2.84313	7.04432e-05	0.0011152	-1.01762	0.830553	1	2.79391	7.06057e-06	0.000331032
AS-tDR-008139	-	-	pre-chr19.trna3490-GlyGCC	41	72	GAAACTAAATCCAACTAGCAAAGACTGTTTCTACAGCCAAGCATTGGTGGTTCAGTGGTAGAATTCTCGCCTGCCACGCGGGAGGCCCGGGTTCGATTCCCGGCCAATGCACGGTCTCTTTTTCTTAAATACTTTGCTCAAGAAGTCAGGA	151	.........(((.((((((((((.((((....))))((..((((((((......(((((((.........))))))).((((((...((....)).))))))))))))))..)).................))))))).....)))..)))	GCATTGGTGGTTCAGTGGTAGAATTCTCGCCA	Other	32	32T>A	1442	845	1427	1213	2031	2054	2705	4214	5567	2840	2255	3091	14752.1	12700.5	19707	15096.3	12357.5	12654.7	10937.5	21466.8	24967.8	17771.2	14722.6	15283.7	-1.08428	0.682821	0.710204	1.26696	0.297934	0.60396	1.16848	0.38214	0.401923
AS-tDR-001297	-	-	pre-chr19.trna3490-GlyGCC	41	72	GAAACTAAATCCAACTAGCAAAGACTGTTTCTACAGCCAAGCATTGGTGGTTCAGTGGTAGAATTCTCGCCTGCCACGCGGGAGGCCCGGGTTCGATTCCCGGCCAATGCACGGTCTCTTTTTCTTAAATACTTTGCTCAAGAAGTCAGGA	151	.........(((.((((((((((.((((....))))((..((((((((......(((((((.........))))))).((((((...((....)).))))))))))))))..)).................))))))).....)))..)))	GCATTGGTGGTTCAGTGGTAGAATTCTCGCCT	Other	32	ExactMatch	8080	4446	7389	6219	11522	10805	14169	21180	29783	16305	12328	19390	82660.7	66824	102043	77397.9	70105.2	66569.7	57291.5	107894	133576	102028	80487.8	95875.7	-1.08966	0.630718	0.659011	1.36475	0.131445	0.399506	1.25246	0.171611	0.226401
AS-tDR-009271	-	-	pre-chr19.trna3490-GlyGCC	41	91	GAAACTAAATCCAACTAGCAAAGACTGTTTCTACAGCCAAGCATTGGTGGTTCAGTGGTAGAATTCTCGCCTGCCACGCGGGAGGCCCGGGTTCGATTCCCGGCCAATGCACGGTCTCTTTTTCTTAAATACTTTGCTCAAGAAGTCAGGA	151	.........(((.((((((((((.((((....))))((..((((((((......(((((((.........))))))).((((((...((....)).))))))))))))))..)).................))))))).....)))..)))	GCATTGGTGGTTCAGTGGTAGAATTCTCGCCTGCCACGCGGGAGGCCCGGG	Other	51	ExactMatch	1179	682	1188	1213	918	1001	1827	1473	823	1225	1191	1762	12061.5	10250.6	16406.3	15096.3	5585.54	6167.17	7387.37	7503.71	3691.13	7665.4	7775.88	8712.38	-2.01963	0.00372133	0.0128244	1.04507	0.812241	1	-1.93253	0.0110563	0.0386673
AS-tDR-013629	-	-	pre-chr19.trna3490-GlyGCC	43	75	GAAACTAAATCCAACTAGCAAAGACTGTTTCTACAGCCAAGCATTGGTGGTTCAGTGGTAGAATTCTCGCCTGCCACGCGGGAGGCCCGGGTTCGATTCCCGGCCAATGCACGGTCTCTTTTTCTTAAATACTTTGCTCAAGAAGTCAGGA	151	.........(((.((((((((((.((((....))))((..((((((((......(((((((.........))))))).((((((...((....)).))))))))))))))..)).................))))))).....)))..)))	ATTGGTGGTTCAGTGGTAGAATTCTCGCCTGCT	Other	33	33C>T	270	330	240	448	118	540	2829	270	401	213	128	130	2762.18	4959.94	3314.41	5575.54	717.967	3326.95	11438.9	1375.42	1798.47	1332.84	835.695	642.797	1.01488	0.981518	0.994297	-3.65495	0.263842	0.572963	-3.60138	0.00568061	0.0262757
AS-tDR-007217	-	-	pre-chr3.trna10899-GlyGCC	41	70	TATCCTAGTATAGTATAAGAAAAGGCAACTGCTCGTGCTTGCATTGGTGGTTCAGTGGTAGAATTCTCGCCTGCCACGCGGGAGGCCCGGGTTCGATTCCCGGCCAATGCAGTTCCCCTTTTGTTTGAAATCTTATTTTTCTAAAATATTA	151	.....((((((.....((.((((((.((((((.....(((((....(((((.....(((((....)).))).)))))))))).((((.(((.......)))))))...))))))..)))))).)).((((.......))))....))))))	GCATTGTGGTTCAGTGGTAGAATTCTCGCC	Other	30	6-G	422	291	288	320	2623	1890	2782	2005	3538	2164	2049	3408	4317.18	4373.77	3977.3	3982.53	15959.6	11644.3	11248.9	10213.8	15867.8	13541.2	13377.6	16851.2	2.94633	0.000701893	0.0048614	1.21543	0.135375	0.399506	3.58106	1.69507e-05	0.000659455
AS-tDR-007243	-	-	pre-chr3.trna10899-GlyGCC	41	71	TATCCTAGTATAGTATAAGAAAAGGCAACTGCTCGTGCTTGCATTGGTGGTTCAGTGGTAGAATTCTCGCCTGCCACGCGGGAGGCCCGGGTTCGATTCCCGGCCAATGCAGTTCCCCTTTTGTTTGAAATCTTATTTTTCTAAAATATTA	151	.....((((((.....((.((((((.((((((.....(((((....(((((.....(((((....)).))).)))))))))).((((.(((.......)))))))...))))))..)))))).)).((((.......))))....))))))	GCATTGGTGGTTCAGTGGTAGAATTCTCGCA	Other	31	31C>A	1472	1023	1261	1171	8181	7314	10194	8025	10204	7091	6108	8927	15059	15375.8	17414.5	14573.6	49777	45061.6	41218.9	40880.7	45764.6	44371.7	39878.3	44140.4	2.83439	1.16672e-05	0.000335961	-1.01598	0.78469	1	2.78981	1.10539e-06	0.000134748
AS-tDR-000011	-	-	pre-chr3.trna10899-GlyGCC	41	71	TATCCTAGTATAGTATAAGAAAAGGCAACTGCTCGTGCTTGCATTGGTGGTTCAGTGGTAGAATTCTCGCCTGCCACGCGGGAGGCCCGGGTTCGATTCCCGGCCAATGCAGTTCCCCTTTTGTTTGAAATCTTATTTTTCTAAAATATTA	151	.....((((((.....((.((((((.((((((.....(((((....(((((.....(((((....)).))).)))))))))).((((.(((.......)))))))...))))))..)))))).)).((((.......))))....))))))	GCATTGGTGGTTCAGTGGTAGAATTCTCGCC	Other	31	ExactMatch	3775	2342	2838	2642	21401	17776	25419	18449	23956	17800	15419	25093	38619.3	35200.6	39192.9	32880.7	130214	109518	102780	93982.3	107442	111383	100669	124075	2.99181	9.04354e-05	0.00124332	1.01621	0.853136	1	3.0403	6.80096e-06	0.000331032
AS-tDR-007238	-	-	pre-chr3.trna10899-GlyGCC	41	71	TATCCTAGTATAGTATAAGAAAAGGCAACTGCTCGTGCTTGCATTGGTGGTTCAGTGGTAGAATTCTCGCCTGCCACGCGGGAGGCCCGGGTTCGATTCCCGGCCAATGCAGTTCCCCTTTTGTTTGAAATCTTATTTTTCTAAAATATTA	151	.....((((((.....((.((((((.((((((.....(((((....(((((.....(((((....)).))).)))))))))).((((.(((.......)))))))...))))))..)))))).)).((((.......))))....))))))	GCATTGGTGGTTCAGTGGTAGAATTCTCGCT	Other	31	31C>T	4605	2980	3557	3243	24756	21737	28894	22442	30176	20613	17031	26546	47110.5	44789.8	49122.4	40360.4	150627	133922	116831	114323	135338	128985	111193	131259	2.84313	7.04432e-05	0.0011152	-1.01762	0.830553	1	2.79391	7.06057e-06	0.000331032
AS-tDR-008139	-	-	pre-chr3.trna10899-GlyGCC	41	72	TATCCTAGTATAGTATAAGAAAAGGCAACTGCTCGTGCTTGCATTGGTGGTTCAGTGGTAGAATTCTCGCCTGCCACGCGGGAGGCCCGGGTTCGATTCCCGGCCAATGCAGTTCCCCTTTTGTTTGAAATCTTATTTTTCTAAAATATTA	151	.....((((((.....((.((((((.((((((.....(((((....(((((.....(((((....)).))).)))))))))).((((.(((.......)))))))...))))))..)))))).)).((((.......))))....))))))	GCATTGGTGGTTCAGTGGTAGAATTCTCGCCA	Other	32	32T>A	1442	845	1427	1213	2031	2054	2705	4214	5567	2840	2255	3091	14752.1	12700.5	19707	15096.3	12357.5	12654.7	10937.5	21466.8	24967.8	17771.2	14722.6	15283.7	-1.08428	0.682821	0.710204	1.26696	0.297934	0.60396	1.16848	0.38214	0.401923
AS-tDR-001297	-	-	pre-chr3.trna10899-GlyGCC	41	72	TATCCTAGTATAGTATAAGAAAAGGCAACTGCTCGTGCTTGCATTGGTGGTTCAGTGGTAGAATTCTCGCCTGCCACGCGGGAGGCCCGGGTTCGATTCCCGGCCAATGCAGTTCCCCTTTTGTTTGAAATCTTATTTTTCTAAAATATTA	151	.....((((((.....((.((((((.((((((.....(((((....(((((.....(((((....)).))).)))))))))).((((.(((.......)))))))...))))))..)))))).)).((((.......))))....))))))	GCATTGGTGGTTCAGTGGTAGAATTCTCGCCT	Other	32	ExactMatch	8080	4446	7389	6219	11522	10805	14169	21180	29783	16305	12328	19390	82660.7	66824	102043	77397.9	70105.2	66569.7	57291.5	107894	133576	102028	80487.8	95875.7	-1.08966	0.630718	0.659011	1.36475	0.131445	0.399506	1.25246	0.171611	0.226401
AS-tDR-009271	-	-	pre-chr3.trna10899-GlyGCC	41	91	TATCCTAGTATAGTATAAGAAAAGGCAACTGCTCGTGCTTGCATTGGTGGTTCAGTGGTAGAATTCTCGCCTGCCACGCGGGAGGCCCGGGTTCGATTCCCGGCCAATGCAGTTCCCCTTTTGTTTGAAATCTTATTTTTCTAAAATATTA	151	.....((((((.....((.((((((.((((((.....(((((....(((((.....(((((....)).))).)))))))))).((((.(((.......)))))))...))))))..)))))).)).((((.......))))....))))))	GCATTGGTGGTTCAGTGGTAGAATTCTCGCCTGCCACGCGGGAGGCCCGGG	Other	51	ExactMatch	1179	682	1188	1213	918	1001	1827	1473	823	1225	1191	1762	12061.5	10250.6	16406.3	15096.3	5585.54	6167.17	7387.37	7503.71	3691.13	7665.4	7775.88	8712.38	-2.01963	0.00372133	0.0128244	1.04507	0.812241	1	-1.93253	0.0110563	0.0386673
AS-tDR-013629	-	-	pre-chr3.trna10899-GlyGCC	43	75	TATCCTAGTATAGTATAAGAAAAGGCAACTGCTCGTGCTTGCATTGGTGGTTCAGTGGTAGAATTCTCGCCTGCCACGCGGGAGGCCCGGGTTCGATTCCCGGCCAATGCAGTTCCCCTTTTGTTTGAAATCTTATTTTTCTAAAATATTA	151	.....((((((.....((.((((((.((((((.....(((((....(((((.....(((((....)).))).)))))))))).((((.(((.......)))))))...))))))..)))))).)).((((.......))))....))))))	ATTGGTGGTTCAGTGGTAGAATTCTCGCCTGCT	Other	33	33C>T	270	330	240	448	118	540	2829	270	401	213	128	130	2762.18	4959.94	3314.41	5575.54	717.967	3326.95	11438.9	1375.42	1798.47	1332.84	835.695	642.797	1.01488	0.981518	0.994297	-3.65495	0.263842	0.572963	-3.60138	0.00568061	0.0262757
AS-tDR-007217	-	-	pre-chr10.trna11254-GlyGCC	41	70	ACCGGTTCACATAGGCTTGTTACGAAGCGGTAACTCATCTGCATTGGTGGTTCAGTGGTAGAATTCTCGCCTGCCACGCGGGAGGCCCGGGTTCGATTCCCGGCCAATGCATATGCTGCCTTTTATTCCTCCCCAACTAGGGGAAAATAAA	151	...((.......((((..(((((......))))).(((.(((((((((......(((((((.........))))))).((((((...((....)).))))))))))))))).)))..))))......))(((((.....))))).......	GCATTGTGGTTCAGTGGTAGAATTCTCGCC	Other	30	6-G	422	291	288	320	2623	1890	2782	2005	3538	2164	2049	3408	4317.18	4373.77	3977.3	3982.53	15959.6	11644.3	11248.9	10213.8	15867.8	13541.2	13377.6	16851.2	2.94633	0.000701893	0.0048614	1.21543	0.135375	0.399506	3.58106	1.69507e-05	0.000659455
AS-tDR-007243	-	-	pre-chr10.trna11254-GlyGCC	41	71	ACCGGTTCACATAGGCTTGTTACGAAGCGGTAACTCATCTGCATTGGTGGTTCAGTGGTAGAATTCTCGCCTGCCACGCGGGAGGCCCGGGTTCGATTCCCGGCCAATGCATATGCTGCCTTTTATTCCTCCCCAACTAGGGGAAAATAAA	151	...((.......((((..(((((......))))).(((.(((((((((......(((((((.........))))))).((((((...((....)).))))))))))))))).)))..))))......))(((((.....))))).......	GCATTGGTGGTTCAGTGGTAGAATTCTCGCA	Other	31	31C>A	1472	1023	1261	1171	8181	7314	10194	8025	10204	7091	6108	8927	15059	15375.8	17414.5	14573.6	49777	45061.6	41218.9	40880.7	45764.6	44371.7	39878.3	44140.4	2.83439	1.16672e-05	0.000335961	-1.01598	0.78469	1	2.78981	1.10539e-06	0.000134748
AS-tDR-000011	-	-	pre-chr10.trna11254-GlyGCC	41	71	ACCGGTTCACATAGGCTTGTTACGAAGCGGTAACTCATCTGCATTGGTGGTTCAGTGGTAGAATTCTCGCCTGCCACGCGGGAGGCCCGGGTTCGATTCCCGGCCAATGCATATGCTGCCTTTTATTCCTCCCCAACTAGGGGAAAATAAA	151	...((.......((((..(((((......))))).(((.(((((((((......(((((((.........))))))).((((((...((....)).))))))))))))))).)))..))))......))(((((.....))))).......	GCATTGGTGGTTCAGTGGTAGAATTCTCGCC	Other	31	ExactMatch	3775	2342	2838	2642	21401	17776	25419	18449	23956	17800	15419	25093	38619.3	35200.6	39192.9	32880.7	130214	109518	102780	93982.3	107442	111383	100669	124075	2.99181	9.04354e-05	0.00124332	1.01621	0.853136	1	3.0403	6.80096e-06	0.000331032
AS-tDR-007238	-	-	pre-chr10.trna11254-GlyGCC	41	71	ACCGGTTCACATAGGCTTGTTACGAAGCGGTAACTCATCTGCATTGGTGGTTCAGTGGTAGAATTCTCGCCTGCCACGCGGGAGGCCCGGGTTCGATTCCCGGCCAATGCATATGCTGCCTTTTATTCCTCCCCAACTAGGGGAAAATAAA	151	...((.......((((..(((((......))))).(((.(((((((((......(((((((.........))))))).((((((...((....)).))))))))))))))).)))..))))......))(((((.....))))).......	GCATTGGTGGTTCAGTGGTAGAATTCTCGCT	Other	31	31C>T	4605	2980	3557	3243	24756	21737	28894	22442	30176	20613	17031	26546	47110.5	44789.8	49122.4	40360.4	150627	133922	116831	114323	135338	128985	111193	131259	2.84313	7.04432e-05	0.0011152	-1.01762	0.830553	1	2.79391	7.06057e-06	0.000331032
AS-tDR-008139	-	-	pre-chr10.trna11254-GlyGCC	41	72	ACCGGTTCACATAGGCTTGTTACGAAGCGGTAACTCATCTGCATTGGTGGTTCAGTGGTAGAATTCTCGCCTGCCACGCGGGAGGCCCGGGTTCGATTCCCGGCCAATGCATATGCTGCCTTTTATTCCTCCCCAACTAGGGGAAAATAAA	151	...((.......((((..(((((......))))).(((.(((((((((......(((((((.........))))))).((((((...((....)).))))))))))))))).)))..))))......))(((((.....))))).......	GCATTGGTGGTTCAGTGGTAGAATTCTCGCCA	Other	32	32T>A	1442	845	1427	1213	2031	2054	2705	4214	5567	2840	2255	3091	14752.1	12700.5	19707	15096.3	12357.5	12654.7	10937.5	21466.8	24967.8	17771.2	14722.6	15283.7	-1.08428	0.682821	0.710204	1.26696	0.297934	0.60396	1.16848	0.38214	0.401923
AS-tDR-001297	-	-	pre-chr10.trna11254-GlyGCC	41	72	ACCGGTTCACATAGGCTTGTTACGAAGCGGTAACTCATCTGCATTGGTGGTTCAGTGGTAGAATTCTCGCCTGCCACGCGGGAGGCCCGGGTTCGATTCCCGGCCAATGCATATGCTGCCTTTTATTCCTCCCCAACTAGGGGAAAATAAA	151	...((.......((((..(((((......))))).(((.(((((((((......(((((((.........))))))).((((((...((....)).))))))))))))))).)))..))))......))(((((.....))))).......	GCATTGGTGGTTCAGTGGTAGAATTCTCGCCT	Other	32	ExactMatch	8080	4446	7389	6219	11522	10805	14169	21180	29783	16305	12328	19390	82660.7	66824	102043	77397.9	70105.2	66569.7	57291.5	107894	133576	102028	80487.8	95875.7	-1.08966	0.630718	0.659011	1.36475	0.131445	0.399506	1.25246	0.171611	0.226401
AS-tDR-009271	-	-	pre-chr10.trna11254-GlyGCC	41	91	ACCGGTTCACATAGGCTTGTTACGAAGCGGTAACTCATCTGCATTGGTGGTTCAGTGGTAGAATTCTCGCCTGCCACGCGGGAGGCCCGGGTTCGATTCCCGGCCAATGCATATGCTGCCTTTTATTCCTCCCCAACTAGGGGAAAATAAA	151	...((.......((((..(((((......))))).(((.(((((((((......(((((((.........))))))).((((((...((....)).))))))))))))))).)))..))))......))(((((.....))))).......	GCATTGGTGGTTCAGTGGTAGAATTCTCGCCTGCCACGCGGGAGGCCCGGG	Other	51	ExactMatch	1179	682	1188	1213	918	1001	1827	1473	823	1225	1191	1762	12061.5	10250.6	16406.3	15096.3	5585.54	6167.17	7387.37	7503.71	3691.13	7665.4	7775.88	8712.38	-2.01963	0.00372133	0.0128244	1.04507	0.812241	1	-1.93253	0.0110563	0.0386673
AS-tDR-013629	-	-	pre-chr10.trna11254-GlyGCC	43	75	ACCGGTTCACATAGGCTTGTTACGAAGCGGTAACTCATCTGCATTGGTGGTTCAGTGGTAGAATTCTCGCCTGCCACGCGGGAGGCCCGGGTTCGATTCCCGGCCAATGCATATGCTGCCTTTTATTCCTCCCCAACTAGGGGAAAATAAA	151	...((.......((((..(((((......))))).(((.(((((((((......(((((((.........))))))).((((((...((....)).))))))))))))))).)))..))))......))(((((.....))))).......	ATTGGTGGTTCAGTGGTAGAATTCTCGCCTGCT	Other	33	33C>T	270	330	240	448	118	540	2829	270	401	213	128	130	2762.18	4959.94	3314.41	5575.54	717.967	3326.95	11438.9	1375.42	1798.47	1332.84	835.695	642.797	1.01488	0.981518	0.994297	-3.65495	0.263842	0.572963	-3.60138	0.00568061	0.0262757
AS-tDR-007217	-	-	pre-chr17.trna1897-GlyGCC	41	70	GGTAATGTAACCACCTATAAGATTAAGTATCCTGGTCAAGGCATTGGTGGTTCAGTGGTAGAATTCTCGCCTGCCACGCGGGAGGCCCGGGTTCGATTCCCGGCCAATGCAGATATACCACTTTTGTTTTTCTCTAAAAACACATCTTCAA	151	((..(((.(((((((.....(((.....)))...((....))...))))))).(((((((....((((.(((((...))))).((((.(((.......)))))))...).)))..)))))))..(((((((....))))))))))..))..	GCATTGTGGTTCAGTGGTAGAATTCTCGCC	Other	30	6-G	422	291	288	320	2623	1890	2782	2005	3538	2164	2049	3408	4317.18	4373.77	3977.3	3982.53	15959.6	11644.3	11248.9	10213.8	15867.8	13541.2	13377.6	16851.2	2.94633	0.000701893	0.0048614	1.21543	0.135375	0.399506	3.58106	1.69507e-05	0.000659455
AS-tDR-007243	-	-	pre-chr17.trna1897-GlyGCC	41	71	GGTAATGTAACCACCTATAAGATTAAGTATCCTGGTCAAGGCATTGGTGGTTCAGTGGTAGAATTCTCGCCTGCCACGCGGGAGGCCCGGGTTCGATTCCCGGCCAATGCAGATATACCACTTTTGTTTTTCTCTAAAAACACATCTTCAA	151	((..(((.(((((((.....(((.....)))...((....))...))))))).(((((((....((((.(((((...))))).((((.(((.......)))))))...).)))..)))))))..(((((((....))))))))))..))..	GCATTGGTGGTTCAGTGGTAGAATTCTCGCA	Other	31	31C>A	1472	1023	1261	1171	8181	7314	10194	8025	10204	7091	6108	8927	15059	15375.8	17414.5	14573.6	49777	45061.6	41218.9	40880.7	45764.6	44371.7	39878.3	44140.4	2.83439	1.16672e-05	0.000335961	-1.01598	0.78469	1	2.78981	1.10539e-06	0.000134748
AS-tDR-000011	-	-	pre-chr17.trna1897-GlyGCC	41	71	GGTAATGTAACCACCTATAAGATTAAGTATCCTGGTCAAGGCATTGGTGGTTCAGTGGTAGAATTCTCGCCTGCCACGCGGGAGGCCCGGGTTCGATTCCCGGCCAATGCAGATATACCACTTTTGTTTTTCTCTAAAAACACATCTTCAA	151	((..(((.(((((((.....(((.....)))...((....))...))))))).(((((((....((((.(((((...))))).((((.(((.......)))))))...).)))..)))))))..(((((((....))))))))))..))..	GCATTGGTGGTTCAGTGGTAGAATTCTCGCC	Other	31	ExactMatch	3775	2342	2838	2642	21401	17776	25419	18449	23956	17800	15419	25093	38619.3	35200.6	39192.9	32880.7	130214	109518	102780	93982.3	107442	111383	100669	124075	2.99181	9.04354e-05	0.00124332	1.01621	0.853136	1	3.0403	6.80096e-06	0.000331032
AS-tDR-007238	-	-	pre-chr17.trna1897-GlyGCC	41	71	GGTAATGTAACCACCTATAAGATTAAGTATCCTGGTCAAGGCATTGGTGGTTCAGTGGTAGAATTCTCGCCTGCCACGCGGGAGGCCCGGGTTCGATTCCCGGCCAATGCAGATATACCACTTTTGTTTTTCTCTAAAAACACATCTTCAA	151	((..(((.(((((((.....(((.....)))...((....))...))))))).(((((((....((((.(((((...))))).((((.(((.......)))))))...).)))..)))))))..(((((((....))))))))))..))..	GCATTGGTGGTTCAGTGGTAGAATTCTCGCT	Other	31	31C>T	4605	2980	3557	3243	24756	21737	28894	22442	30176	20613	17031	26546	47110.5	44789.8	49122.4	40360.4	150627	133922	116831	114323	135338	128985	111193	131259	2.84313	7.04432e-05	0.0011152	-1.01762	0.830553	1	2.79391	7.06057e-06	0.000331032
AS-tDR-008139	-	-	pre-chr17.trna1897-GlyGCC	41	72	GGTAATGTAACCACCTATAAGATTAAGTATCCTGGTCAAGGCATTGGTGGTTCAGTGGTAGAATTCTCGCCTGCCACGCGGGAGGCCCGGGTTCGATTCCCGGCCAATGCAGATATACCACTTTTGTTTTTCTCTAAAAACACATCTTCAA	151	((..(((.(((((((.....(((.....)))...((....))...))))))).(((((((....((((.(((((...))))).((((.(((.......)))))))...).)))..)))))))..(((((((....))))))))))..))..	GCATTGGTGGTTCAGTGGTAGAATTCTCGCCA	Other	32	32T>A	1442	845	1427	1213	2031	2054	2705	4214	5567	2840	2255	3091	14752.1	12700.5	19707	15096.3	12357.5	12654.7	10937.5	21466.8	24967.8	17771.2	14722.6	15283.7	-1.08428	0.682821	0.710204	1.26696	0.297934	0.60396	1.16848	0.38214	0.401923
AS-tDR-001297	-	-	pre-chr17.trna1897-GlyGCC	41	72	GGTAATGTAACCACCTATAAGATTAAGTATCCTGGTCAAGGCATTGGTGGTTCAGTGGTAGAATTCTCGCCTGCCACGCGGGAGGCCCGGGTTCGATTCCCGGCCAATGCAGATATACCACTTTTGTTTTTCTCTAAAAACACATCTTCAA	151	((..(((.(((((((.....(((.....)))...((....))...))))))).(((((((....((((.(((((...))))).((((.(((.......)))))))...).)))..)))))))..(((((((....))))))))))..))..	GCATTGGTGGTTCAGTGGTAGAATTCTCGCCT	Other	32	ExactMatch	8080	4446	7389	6219	11522	10805	14169	21180	29783	16305	12328	19390	82660.7	66824	102043	77397.9	70105.2	66569.7	57291.5	107894	133576	102028	80487.8	95875.7	-1.08966	0.630718	0.659011	1.36475	0.131445	0.399506	1.25246	0.171611	0.226401
AS-tDR-009271	-	-	pre-chr17.trna1897-GlyGCC	41	91	GGTAATGTAACCACCTATAAGATTAAGTATCCTGGTCAAGGCATTGGTGGTTCAGTGGTAGAATTCTCGCCTGCCACGCGGGAGGCCCGGGTTCGATTCCCGGCCAATGCAGATATACCACTTTTGTTTTTCTCTAAAAACACATCTTCAA	151	((..(((.(((((((.....(((.....)))...((....))...))))))).(((((((....((((.(((((...))))).((((.(((.......)))))))...).)))..)))))))..(((((((....))))))))))..))..	GCATTGGTGGTTCAGTGGTAGAATTCTCGCCTGCCACGCGGGAGGCCCGGG	Other	51	ExactMatch	1179	682	1188	1213	918	1001	1827	1473	823	1225	1191	1762	12061.5	10250.6	16406.3	15096.3	5585.54	6167.17	7387.37	7503.71	3691.13	7665.4	7775.88	8712.38	-2.01963	0.00372133	0.0128244	1.04507	0.812241	1	-1.93253	0.0110563	0.0386673
AS-tDR-013629	-	-	pre-chr17.trna1897-GlyGCC	43	75	GGTAATGTAACCACCTATAAGATTAAGTATCCTGGTCAAGGCATTGGTGGTTCAGTGGTAGAATTCTCGCCTGCCACGCGGGAGGCCCGGGTTCGATTCCCGGCCAATGCAGATATACCACTTTTGTTTTTCTCTAAAAACACATCTTCAA	151	((..(((.(((((((.....(((.....)))...((....))...))))))).(((((((....((((.(((((...))))).((((.(((.......)))))))...).)))..)))))))..(((((((....))))))))))..))..	ATTGGTGGTTCAGTGGTAGAATTCTCGCCTGCT	Other	33	33C>T	270	330	240	448	118	540	2829	270	401	213	128	130	2762.18	4959.94	3314.41	5575.54	717.967	3326.95	11438.9	1375.42	1798.47	1332.84	835.695	642.797	1.01488	0.981518	0.994297	-3.65495	0.263842	0.572963	-3.60138	0.00568061	0.0262757
AS-tDR-007217	-	-	pre-chr19.trna1527-GlyGCC	41	70	CCTGAGAAGAGCTCTACAGACACCACACCACACAGCTGGAGCATTGGTGGTTCAGTGGTAGAATTCTCGCCTGCCACGCGGGAGGCCCGGGTTCGATTCCCGGCCAATGCAGAGCCTTTTTTTTTCTTTTTTGTAAATACACACACACACA	151	...((((((.(((((.((....((..(((((...((....))....)))))...(((((((.........)))))))..))..((((.(((.......)))))))..)).)))))))))))..............................	GCATTGTGGTTCAGTGGTAGAATTCTCGCC	Other	30	6-G	422	291	288	320	2623	1890	2782	2005	3538	2164	2049	3408	4317.18	4373.77	3977.3	3982.53	15959.6	11644.3	11248.9	10213.8	15867.8	13541.2	13377.6	16851.2	2.94633	0.000701893	0.0048614	1.21543	0.135375	0.399506	3.58106	1.69507e-05	0.000659455
AS-tDR-007243	-	-	pre-chr19.trna1527-GlyGCC	41	71	CCTGAGAAGAGCTCTACAGACACCACACCACACAGCTGGAGCATTGGTGGTTCAGTGGTAGAATTCTCGCCTGCCACGCGGGAGGCCCGGGTTCGATTCCCGGCCAATGCAGAGCCTTTTTTTTTCTTTTTTGTAAATACACACACACACA	151	...((((((.(((((.((....((..(((((...((....))....)))))...(((((((.........)))))))..))..((((.(((.......)))))))..)).)))))))))))..............................	GCATTGGTGGTTCAGTGGTAGAATTCTCGCA	Other	31	31C>A	1472	1023	1261	1171	8181	7314	10194	8025	10204	7091	6108	8927	15059	15375.8	17414.5	14573.6	49777	45061.6	41218.9	40880.7	45764.6	44371.7	39878.3	44140.4	2.83439	1.16672e-05	0.000335961	-1.01598	0.78469	1	2.78981	1.10539e-06	0.000134748
AS-tDR-000011	-	-	pre-chr19.trna1527-GlyGCC	41	71	CCTGAGAAGAGCTCTACAGACACCACACCACACAGCTGGAGCATTGGTGGTTCAGTGGTAGAATTCTCGCCTGCCACGCGGGAGGCCCGGGTTCGATTCCCGGCCAATGCAGAGCCTTTTTTTTTCTTTTTTGTAAATACACACACACACA	151	...((((((.(((((.((....((..(((((...((....))....)))))...(((((((.........)))))))..))..((((.(((.......)))))))..)).)))))))))))..............................	GCATTGGTGGTTCAGTGGTAGAATTCTCGCC	Other	31	ExactMatch	3775	2342	2838	2642	21401	17776	25419	18449	23956	17800	15419	25093	38619.3	35200.6	39192.9	32880.7	130214	109518	102780	93982.3	107442	111383	100669	124075	2.99181	9.04354e-05	0.00124332	1.01621	0.853136	1	3.0403	6.80096e-06	0.000331032
AS-tDR-007238	-	-	pre-chr19.trna1527-GlyGCC	41	71	CCTGAGAAGAGCTCTACAGACACCACACCACACAGCTGGAGCATTGGTGGTTCAGTGGTAGAATTCTCGCCTGCCACGCGGGAGGCCCGGGTTCGATTCCCGGCCAATGCAGAGCCTTTTTTTTTCTTTTTTGTAAATACACACACACACA	151	...((((((.(((((.((....((..(((((...((....))....)))))...(((((((.........)))))))..))..((((.(((.......)))))))..)).)))))))))))..............................	GCATTGGTGGTTCAGTGGTAGAATTCTCGCT	Other	31	31C>T	4605	2980	3557	3243	24756	21737	28894	22442	30176	20613	17031	26546	47110.5	44789.8	49122.4	40360.4	150627	133922	116831	114323	135338	128985	111193	131259	2.84313	7.04432e-05	0.0011152	-1.01762	0.830553	1	2.79391	7.06057e-06	0.000331032
AS-tDR-008139	-	-	pre-chr19.trna1527-GlyGCC	41	72	CCTGAGAAGAGCTCTACAGACACCACACCACACAGCTGGAGCATTGGTGGTTCAGTGGTAGAATTCTCGCCTGCCACGCGGGAGGCCCGGGTTCGATTCCCGGCCAATGCAGAGCCTTTTTTTTTCTTTTTTGTAAATACACACACACACA	151	...((((((.(((((.((....((..(((((...((....))....)))))...(((((((.........)))))))..))..((((.(((.......)))))))..)).)))))))))))..............................	GCATTGGTGGTTCAGTGGTAGAATTCTCGCCA	Other	32	32T>A	1442	845	1427	1213	2031	2054	2705	4214	5567	2840	2255	3091	14752.1	12700.5	19707	15096.3	12357.5	12654.7	10937.5	21466.8	24967.8	17771.2	14722.6	15283.7	-1.08428	0.682821	0.710204	1.26696	0.297934	0.60396	1.16848	0.38214	0.401923
AS-tDR-001297	-	-	pre-chr19.trna1527-GlyGCC	41	72	CCTGAGAAGAGCTCTACAGACACCACACCACACAGCTGGAGCATTGGTGGTTCAGTGGTAGAATTCTCGCCTGCCACGCGGGAGGCCCGGGTTCGATTCCCGGCCAATGCAGAGCCTTTTTTTTTCTTTTTTGTAAATACACACACACACA	151	...((((((.(((((.((....((..(((((...((....))....)))))...(((((((.........)))))))..))..((((.(((.......)))))))..)).)))))))))))..............................	GCATTGGTGGTTCAGTGGTAGAATTCTCGCCT	Other	32	ExactMatch	8080	4446	7389	6219	11522	10805	14169	21180	29783	16305	12328	19390	82660.7	66824	102043	77397.9	70105.2	66569.7	57291.5	107894	133576	102028	80487.8	95875.7	-1.08966	0.630718	0.659011	1.36475	0.131445	0.399506	1.25246	0.171611	0.226401
AS-tDR-009271	-	-	pre-chr19.trna1527-GlyGCC	41	91	CCTGAGAAGAGCTCTACAGACACCACACCACACAGCTGGAGCATTGGTGGTTCAGTGGTAGAATTCTCGCCTGCCACGCGGGAGGCCCGGGTTCGATTCCCGGCCAATGCAGAGCCTTTTTTTTTCTTTTTTGTAAATACACACACACACA	151	...((((((.(((((.((....((..(((((...((....))....)))))...(((((((.........)))))))..))..((((.(((.......)))))))..)).)))))))))))..............................	GCATTGGTGGTTCAGTGGTAGAATTCTCGCCTGCCACGCGGGAGGCCCGGG	Other	51	ExactMatch	1179	682	1188	1213	918	1001	1827	1473	823	1225	1191	1762	12061.5	10250.6	16406.3	15096.3	5585.54	6167.17	7387.37	7503.71	3691.13	7665.4	7775.88	8712.38	-2.01963	0.00372133	0.0128244	1.04507	0.812241	1	-1.93253	0.0110563	0.0386673
AS-tDR-013629	-	-	pre-chr19.trna1527-GlyGCC	43	75	CCTGAGAAGAGCTCTACAGACACCACACCACACAGCTGGAGCATTGGTGGTTCAGTGGTAGAATTCTCGCCTGCCACGCGGGAGGCCCGGGTTCGATTCCCGGCCAATGCAGAGCCTTTTTTTTTCTTTTTTGTAAATACACACACACACA	151	...((((((.(((((.((....((..(((((...((....))....)))))...(((((((.........)))))))..))..((((.(((.......)))))))..)).)))))))))))..............................	ATTGGTGGTTCAGTGGTAGAATTCTCGCCTGCT	Other	33	33C>T	270	330	240	448	118	540	2829	270	401	213	128	130	2762.18	4959.94	3314.41	5575.54	717.967	3326.95	11438.9	1375.42	1798.47	1332.84	835.695	642.797	1.01488	0.981518	0.994297	-3.65495	0.263842	0.572963	-3.60138	0.00568061	0.0262757
AS-tDR-007217	-	-	chr2.trna4358-GlyCCC	1	30	GCATTGGTGGTTCAGTGGTAGAATTCTCGCCTCCCACGCGGGAGACCCGGGTTCGATTCCCGGCCAATGCACCA	74	)))))))..)))).......((((.))))).......(((((....))))).......((((((((((((.	GCATTGTGGTTCAGTGGTAGAATTCTCGCC	tRF-5	30	6-G	422	291	288	320	2623	1890	2782	2005	3538	2164	2049	3408	4317.18	4373.77	3977.3	3982.53	15959.6	11644.3	11248.9	10213.8	15867.8	13541.2	13377.6	16851.2	2.94633	0.000701893	0.0048614	1.21543	0.135375	0.399506	3.58106	1.69507e-05	0.000659455
AS-tDR-007243	-	-	chr2.trna4358-GlyCCC	1	31	GCATTGGTGGTTCAGTGGTAGAATTCTCGCCTCCCACGCGGGAGACCCGGGTTCGATTCCCGGCCAATGCACCA	74	)))))))..)))).......((((.))))).......(((((....))))).......((((((((((((.	GCATTGGTGGTTCAGTGGTAGAATTCTCGCA	tiRNA-5	31	31C>A	1472	1023	1261	1171	8181	7314	10194	8025	10204	7091	6108	8927	15059	15375.8	17414.5	14573.6	49777	45061.6	41218.9	40880.7	45764.6	44371.7	39878.3	44140.4	2.83439	1.16672e-05	0.000335961	-1.01598	0.78469	1	2.78981	1.10539e-06	0.000134748
AS-tDR-000011	-	-	chr2.trna4358-GlyCCC	1	31	GCATTGGTGGTTCAGTGGTAGAATTCTCGCCTCCCACGCGGGAGACCCGGGTTCGATTCCCGGCCAATGCACCA	74	)))))))..)))).......((((.))))).......(((((....))))).......((((((((((((.	GCATTGGTGGTTCAGTGGTAGAATTCTCGCC	tiRNA-5	31	ExactMatch	3775	2342	2838	2642	21401	17776	25419	18449	23956	17800	15419	25093	38619.3	35200.6	39192.9	32880.7	130214	109518	102780	93982.3	107442	111383	100669	124075	2.99181	9.04354e-05	0.00124332	1.01621	0.853136	1	3.0403	6.80096e-06	0.000331032
AS-tDR-007238	-	-	chr2.trna4358-GlyCCC	1	31	GCATTGGTGGTTCAGTGGTAGAATTCTCGCCTCCCACGCGGGAGACCCGGGTTCGATTCCCGGCCAATGCACCA	74	)))))))..)))).......((((.))))).......(((((....))))).......((((((((((((.	GCATTGGTGGTTCAGTGGTAGAATTCTCGCT	tiRNA-5	31	31C>T	4605	2980	3557	3243	24756	21737	28894	22442	30176	20613	17031	26546	47110.5	44789.8	49122.4	40360.4	150627	133922	116831	114323	135338	128985	111193	131259	2.84313	7.04432e-05	0.0011152	-1.01762	0.830553	1	2.79391	7.06057e-06	0.000331032
AS-tDR-008139	-	-	chr2.trna4358-GlyCCC	1	32	GCATTGGTGGTTCAGTGGTAGAATTCTCGCCTCCCACGCGGGAGACCCGGGTTCGATTCCCGGCCAATGCACCA	74	)))))))..)))).......((((.))))).......(((((....))))).......((((((((((((.	GCATTGGTGGTTCAGTGGTAGAATTCTCGCCA	tiRNA-5	32	32T>A	1442	845	1427	1213	2031	2054	2705	4214	5567	2840	2255	3091	14752.1	12700.5	19707	15096.3	12357.5	12654.7	10937.5	21466.8	24967.8	17771.2	14722.6	15283.7	-1.08428	0.682821	0.710204	1.26696	0.297934	0.60396	1.16848	0.38214	0.401923
AS-tDR-001297	-	-	chr2.trna4358-GlyCCC	1	32	GCATTGGTGGTTCAGTGGTAGAATTCTCGCCTCCCACGCGGGAGACCCGGGTTCGATTCCCGGCCAATGCACCA	74	)))))))..)))).......((((.))))).......(((((....))))).......((((((((((((.	GCATTGGTGGTTCAGTGGTAGAATTCTCGCCT	tiRNA-5	32	ExactMatch	8080	4446	7389	6219	11522	10805	14169	21180	29783	16305	12328	19390	82660.7	66824	102043	77397.9	70105.2	66569.7	57291.5	107894	133576	102028	80487.8	95875.7	-1.08966	0.630718	0.659011	1.36475	0.131445	0.399506	1.25246	0.171611	0.226401
AS-tDR-007217	-	-	pre-chr2.trna4358-GlyCCC	41	70	AATTAGATCTTTCTATCCTTCAAGAATGCTTCTACAGGGAGCATTGGTGGTTCAGTGGTAGAATTCTCGCCTCCCACGCGGGAGACCCGGGTTCGATTCCCGGCCAATGCAGAGTCTCTGTTTTCAAATTTTCTCAAATTTCTATTTAGTA	151	.(((((((..((((((((((((..((((((((.....))))))))..)))...)).)))))))..(((..(((((....)))))..(((((.......)))))........))).............................))))))).	GCATTGTGGTTCAGTGGTAGAATTCTCGCC	Other	30	6-G	422	291	288	320	2623	1890	2782	2005	3538	2164	2049	3408	4317.18	4373.77	3977.3	3982.53	15959.6	11644.3	11248.9	10213.8	15867.8	13541.2	13377.6	16851.2	2.94633	0.000701893	0.0048614	1.21543	0.135375	0.399506	3.58106	1.69507e-05	0.000659455
AS-tDR-007243	-	-	pre-chr2.trna4358-GlyCCC	41	71	AATTAGATCTTTCTATCCTTCAAGAATGCTTCTACAGGGAGCATTGGTGGTTCAGTGGTAGAATTCTCGCCTCCCACGCGGGAGACCCGGGTTCGATTCCCGGCCAATGCAGAGTCTCTGTTTTCAAATTTTCTCAAATTTCTATTTAGTA	151	.(((((((..((((((((((((..((((((((.....))))))))..)))...)).)))))))..(((..(((((....)))))..(((((.......)))))........))).............................))))))).	GCATTGGTGGTTCAGTGGTAGAATTCTCGCA	Other	31	31C>A	1472	1023	1261	1171	8181	7314	10194	8025	10204	7091	6108	8927	15059	15375.8	17414.5	14573.6	49777	45061.6	41218.9	40880.7	45764.6	44371.7	39878.3	44140.4	2.83439	1.16672e-05	0.000335961	-1.01598	0.78469	1	2.78981	1.10539e-06	0.000134748
AS-tDR-000011	-	-	pre-chr2.trna4358-GlyCCC	41	71	AATTAGATCTTTCTATCCTTCAAGAATGCTTCTACAGGGAGCATTGGTGGTTCAGTGGTAGAATTCTCGCCTCCCACGCGGGAGACCCGGGTTCGATTCCCGGCCAATGCAGAGTCTCTGTTTTCAAATTTTCTCAAATTTCTATTTAGTA	151	.(((((((..((((((((((((..((((((((.....))))))))..)))...)).)))))))..(((..(((((....)))))..(((((.......)))))........))).............................))))))).	GCATTGGTGGTTCAGTGGTAGAATTCTCGCC	Other	31	ExactMatch	3775	2342	2838	2642	21401	17776	25419	18449	23956	17800	15419	25093	38619.3	35200.6	39192.9	32880.7	130214	109518	102780	93982.3	107442	111383	100669	124075	2.99181	9.04354e-05	0.00124332	1.01621	0.853136	1	3.0403	6.80096e-06	0.000331032
AS-tDR-007238	-	-	pre-chr2.trna4358-GlyCCC	41	71	AATTAGATCTTTCTATCCTTCAAGAATGCTTCTACAGGGAGCATTGGTGGTTCAGTGGTAGAATTCTCGCCTCCCACGCGGGAGACCCGGGTTCGATTCCCGGCCAATGCAGAGTCTCTGTTTTCAAATTTTCTCAAATTTCTATTTAGTA	151	.(((((((..((((((((((((..((((((((.....))))))))..)))...)).)))))))..(((..(((((....)))))..(((((.......)))))........))).............................))))))).	GCATTGGTGGTTCAGTGGTAGAATTCTCGCT	Other	31	31C>T	4605	2980	3557	3243	24756	21737	28894	22442	30176	20613	17031	26546	47110.5	44789.8	49122.4	40360.4	150627	133922	116831	114323	135338	128985	111193	131259	2.84313	7.04432e-05	0.0011152	-1.01762	0.830553	1	2.79391	7.06057e-06	0.000331032
AS-tDR-008139	-	-	pre-chr2.trna4358-GlyCCC	41	72	AATTAGATCTTTCTATCCTTCAAGAATGCTTCTACAGGGAGCATTGGTGGTTCAGTGGTAGAATTCTCGCCTCCCACGCGGGAGACCCGGGTTCGATTCCCGGCCAATGCAGAGTCTCTGTTTTCAAATTTTCTCAAATTTCTATTTAGTA	151	.(((((((..((((((((((((..((((((((.....))))))))..)))...)).)))))))..(((..(((((....)))))..(((((.......)))))........))).............................))))))).	GCATTGGTGGTTCAGTGGTAGAATTCTCGCCA	Other	32	32T>A	1442	845	1427	1213	2031	2054	2705	4214	5567	2840	2255	3091	14752.1	12700.5	19707	15096.3	12357.5	12654.7	10937.5	21466.8	24967.8	17771.2	14722.6	15283.7	-1.08428	0.682821	0.710204	1.26696	0.297934	0.60396	1.16848	0.38214	0.401923
AS-tDR-001297	-	-	pre-chr2.trna4358-GlyCCC	41	72	AATTAGATCTTTCTATCCTTCAAGAATGCTTCTACAGGGAGCATTGGTGGTTCAGTGGTAGAATTCTCGCCTCCCACGCGGGAGACCCGGGTTCGATTCCCGGCCAATGCAGAGTCTCTGTTTTCAAATTTTCTCAAATTTCTATTTAGTA	151	.(((((((..((((((((((((..((((((((.....))))))))..)))...)).)))))))..(((..(((((....)))))..(((((.......)))))........))).............................))))))).	GCATTGGTGGTTCAGTGGTAGAATTCTCGCCT	Other	32	ExactMatch	8080	4446	7389	6219	11522	10805	14169	21180	29783	16305	12328	19390	82660.7	66824	102043	77397.9	70105.2	66569.7	57291.5	107894	133576	102028	80487.8	95875.7	-1.08966	0.630718	0.659011	1.36475	0.131445	0.399506	1.25246	0.171611	0.226401
AS-tDR-000660	-	-	chr13.trna2246-GlyGCC	1	30	GCATGGGTGGTTCAGTGGTAGAATTCTCGCCTGCCACGCGGGAGGCCCGGGTTCGATTCCCGGCCCATGCACCA	74	)))))))..)))).......((((.))))).......(((((....))))).......((((((((((((.	GCATGGGTGGTTCAGTGGTAGAATTCTCGC	tRF-5	30	ExactMatch	71	37	52	62	776	684	779	630	779	433	340	696	726.35	556.115	718.123	771.615	4721.54	4214.13	3149.84	3209.32	3493.79	2709.48	2219.81	3441.44	5.51071	0.000197098	0.00231764	-1.28903	0.132639	0.399506	4.27509	0.000329377	0.00405566
AS-tDR-007235	-	-	chr13.trna2246-GlyGCC	1	30	GCATGGGTGGTTCAGTGGTAGAATTCTCGCCTGCCACGCGGGAGGCCCGGGTTCGATTCCCGGCCCATGCACCA	74	)))))))..)))).......((((.))))).......(((((....))))).......((((((((((((.	GCATGGGTGGTTCAGTGGTAGAATTCTCGT	tRF-5	30	30C>T	89	45	53	69	743	642	779	630	836	451	286	559	910.495	676.356	731.933	858.732	4520.76	3955.37	3149.84	3209.32	3749.43	2822.12	1867.26	2764.03	4.66422	0.00011978	0.00154282	-1.32413	0.121995	0.399506	3.52248	0.00207869	0.015837
AS-tDR-007336	-	-	chr13.trna2246-GlyGCC	1	31	GCATGGGTGGTTCAGTGGTAGAATTCTCGCCTGCCACGCGGGAGGCCCGGGTTCGATTCCCGGCCCATGCACCA	74	)))))))..)))).......((((.))))).......(((((....))))).......((((((((((((.	GCATGGGTGGTTCAGTGGTAGAATTCTCGCA	tiRNA-5	31	31C>A	193	124	135	162	3318	3385	4044	3260	3116	2135	1886	3577	1974.44	1863.74	1864.36	2016.15	20188.3	20855	16351.7	16607	13975.2	13359.7	12313.4	17686.8	9.58292	7.99966e-06	0.000335961	-1.29067	0.0457345	0.253897	7.42476	4.14189e-05	0.00110152
AS-tDR-000009	-	-	chr13.trna2246-GlyGCC	1	31	GCATGGGTGGTTCAGTGGTAGAATTCTCGCCTGCCACGCGGGAGGCCCGGGTTCGATTCCCGGCCCATGCACCA	74	)))))))..)))).......((((.))))).......(((((....))))).......((((((((((((.	GCATGGGTGGTTCAGTGGTAGAATTCTCGCC	tiRNA-5	31	ExactMatch	471	246	312	357	8973	8370	10291	7299	7409	5370	4967	10118	4818.46	3697.41	4308.74	4443.01	54595.9	51567.7	41611.1	37182.3	33229.1	33602.6	32428.9	50029.4	10.709	5.14505e-05	0.000908959	-1.2389	0.181443	0.450773	8.64389	0.000239525	0.00355151
AS-tDR-007328	-	-	chr13.trna2246-GlyGCC	1	31	GCATGGGTGGTTCAGTGGTAGAATTCTCGCCTGCCACGCGGGAGGCCCGGGTTCGATTCCCGGCCCATGCACCA	74	)))))))..)))).......((((.))))).......(((((....))))).......((((((((((((.	GCATGGGTGGTTCAGTGGTAGAATTCTCGCT	tiRNA-5	31	31C>T	570	323	410	439	10259	10041	11520	8848	9067	6392	5299	10886	5831.26	4854.73	5662.12	5463.53	62420.5	61862.7	46580.5	45073.2	40665.2	39997.7	34596.5	53826.9	9.89844	4.97679e-05	0.000908543	-1.27707	0.109727	0.392423	7.75087	0.000105118	0.00222207
AS-tDR-001289	-	-	chr13.trna2246-GlyGCC	1	32	GCATGGGTGGTTCAGTGGTAGAATTCTCGCCTGCCACGCGGGAGGCCCGGGTTCGATTCCCGGCCCATGCACCA	74	)))))))..)))).......((((.))))).......(((((....))))).......((((((((((((.	GCATGGGTGGTTCAGTGGTAGAATTCTCGCCT	tiRNA-5	32	ExactMatch	774	482	694	730	1676	1776	2042	2409	2946	1643	1678	2421	7918.24	7244.53	9584.18	9085.14	10197.6	10942	8256.71	12271.8	13212.7	10281	10955.4	11970.9	1.23159	0.0962409	0.139387	1.11403	0.30263	0.611446	1.37203	0.00918402	0.0343085
AS-tDR-005360	-	-	chr13.trna2246-GlyGCC	16	31	GCATGGGTGGTTCAGTGGTAGAATTCTCGCCTGCCACGCGGGAGGCCCGGGTTCGATTCCCGGCCCATGCACCA	74	)))))))..)))).......((((.))))).......(((((....))))).......((((((((((((.	TGGTAGAATTCTCGCC	i-tRF	16	ExactMatch	813	596	527	514	290	506	748	271	597	805	816	882	8317.22	8957.96	7277.9	6396.93	1764.49	3117.47	3024.5	1380.52	2677.53	5037.26	5327.55	4361.13	-3.33162	0.000278014	0.00269681	1.87359	0.0334347	0.245845	-1.7782	0.00612978	0.0269431
AS-tDR-009969	-	-	chr13.trna2246-GlyGCC	16	31	GCATGGGTGGTTCAGTGGTAGAATTCTCGCCTGCCACGCGGGAGGCCCGGGTTCGATTCCCGGCCCATGCACCA	74	)))))))..)))).......((((.))))).......(((((....))))).......((((((((((((.	TGGTAGAATTCTCGCT	i-tRF	16	16C>T	963	769	594	606	359	540	843	342	704	905	858	933	9851.76	11558.2	8203.17	7541.91	2184.32	3326.95	3408.62	1742.2	3157.42	5663.01	5601.77	4613.31	-3.48384	0.000542026	0.00412956	1.78505	0.0267969	0.245845	-1.95168	0.00554618	0.0262757
AS-tDR-000660	-	-	chr13.trna2377-GlyGCC	1	30	GCATGGGTGGTTCAGTGGTAGAATTCTCGCCTGCCACGCGGGAGGCCCGGGTTCGATTCCCGGCCCATGCACCA	74	)))))))..)))).......((((.))))).......(((((....))))).......((((((((((((.	GCATGGGTGGTTCAGTGGTAGAATTCTCGC	tRF-5	30	ExactMatch	71	37	52	62	776	684	779	630	779	433	340	696	726.35	556.115	718.123	771.615	4721.54	4214.13	3149.84	3209.32	3493.79	2709.48	2219.81	3441.44	5.51071	0.000197098	0.00231764	-1.28903	0.132639	0.399506	4.27509	0.000329377	0.00405566
AS-tDR-007235	-	-	chr13.trna2377-GlyGCC	1	30	GCATGGGTGGTTCAGTGGTAGAATTCTCGCCTGCCACGCGGGAGGCCCGGGTTCGATTCCCGGCCCATGCACCA	74	)))))))..)))).......((((.))))).......(((((....))))).......((((((((((((.	GCATGGGTGGTTCAGTGGTAGAATTCTCGT	tRF-5	30	30C>T	89	45	53	69	743	642	779	630	836	451	286	559	910.495	676.356	731.933	858.732	4520.76	3955.37	3149.84	3209.32	3749.43	2822.12	1867.26	2764.03	4.66422	0.00011978	0.00154282	-1.32413	0.121995	0.399506	3.52248	0.00207869	0.015837
AS-tDR-007336	-	-	chr13.trna2377-GlyGCC	1	31	GCATGGGTGGTTCAGTGGTAGAATTCTCGCCTGCCACGCGGGAGGCCCGGGTTCGATTCCCGGCCCATGCACCA	74	)))))))..)))).......((((.))))).......(((((....))))).......((((((((((((.	GCATGGGTGGTTCAGTGGTAGAATTCTCGCA	tiRNA-5	31	31C>A	193	124	135	162	3318	3385	4044	3260	3116	2135	1886	3577	1974.44	1863.74	1864.36	2016.15	20188.3	20855	16351.7	16607	13975.2	13359.7	12313.4	17686.8	9.58292	7.99966e-06	0.000335961	-1.29067	0.0457345	0.253897	7.42476	4.14189e-05	0.00110152
AS-tDR-000009	-	-	chr13.trna2377-GlyGCC	1	31	GCATGGGTGGTTCAGTGGTAGAATTCTCGCCTGCCACGCGGGAGGCCCGGGTTCGATTCCCGGCCCATGCACCA	74	)))))))..)))).......((((.))))).......(((((....))))).......((((((((((((.	GCATGGGTGGTTCAGTGGTAGAATTCTCGCC	tiRNA-5	31	ExactMatch	471	246	312	357	8973	8370	10291	7299	7409	5370	4967	10118	4818.46	3697.41	4308.74	4443.01	54595.9	51567.7	41611.1	37182.3	33229.1	33602.6	32428.9	50029.4	10.709	5.14505e-05	0.000908959	-1.2389	0.181443	0.450773	8.64389	0.000239525	0.00355151
AS-tDR-007328	-	-	chr13.trna2377-GlyGCC	1	31	GCATGGGTGGTTCAGTGGTAGAATTCTCGCCTGCCACGCGGGAGGCCCGGGTTCGATTCCCGGCCCATGCACCA	74	)))))))..)))).......((((.))))).......(((((....))))).......((((((((((((.	GCATGGGTGGTTCAGTGGTAGAATTCTCGCT	tiRNA-5	31	31C>T	570	323	410	439	10259	10041	11520	8848	9067	6392	5299	10886	5831.26	4854.73	5662.12	5463.53	62420.5	61862.7	46580.5	45073.2	40665.2	39997.7	34596.5	53826.9	9.89844	4.97679e-05	0.000908543	-1.27707	0.109727	0.392423	7.75087	0.000105118	0.00222207
AS-tDR-001289	-	-	chr13.trna2377-GlyGCC	1	32	GCATGGGTGGTTCAGTGGTAGAATTCTCGCCTGCCACGCGGGAGGCCCGGGTTCGATTCCCGGCCCATGCACCA	74	)))))))..)))).......((((.))))).......(((((....))))).......((((((((((((.	GCATGGGTGGTTCAGTGGTAGAATTCTCGCCT	tiRNA-5	32	ExactMatch	774	482	694	730	1676	1776	2042	2409	2946	1643	1678	2421	7918.24	7244.53	9584.18	9085.14	10197.6	10942	8256.71	12271.8	13212.7	10281	10955.4	11970.9	1.23159	0.0962409	0.139387	1.11403	0.30263	0.611446	1.37203	0.00918402	0.0343085
AS-tDR-005360	-	-	chr13.trna2377-GlyGCC	16	31	GCATGGGTGGTTCAGTGGTAGAATTCTCGCCTGCCACGCGGGAGGCCCGGGTTCGATTCCCGGCCCATGCACCA	74	)))))))..)))).......((((.))))).......(((((....))))).......((((((((((((.	TGGTAGAATTCTCGCC	i-tRF	16	ExactMatch	813	596	527	514	290	506	748	271	597	805	816	882	8317.22	8957.96	7277.9	6396.93	1764.49	3117.47	3024.5	1380.52	2677.53	5037.26	5327.55	4361.13	-3.33162	0.000278014	0.00269681	1.87359	0.0334347	0.245845	-1.7782	0.00612978	0.0269431
AS-tDR-009969	-	-	chr13.trna2377-GlyGCC	16	31	GCATGGGTGGTTCAGTGGTAGAATTCTCGCCTGCCACGCGGGAGGCCCGGGTTCGATTCCCGGCCCATGCACCA	74	)))))))..)))).......((((.))))).......(((((....))))).......((((((((((((.	TGGTAGAATTCTCGCT	i-tRF	16	16C>T	963	769	594	606	359	540	843	342	704	905	858	933	9851.76	11558.2	8203.17	7541.91	2184.32	3326.95	3408.62	1742.2	3157.42	5663.01	5601.77	4613.31	-3.48384	0.000542026	0.00412956	1.78505	0.0267969	0.245845	-1.95168	0.00554618	0.0262757
AS-tDR-000660	-	-	pre-chr13.trna2246-GlyGCC	41	70	GTACAGGCTGTGTGAGCGTCAGATAGCACTTACAGCCAGGGCATGGGTGGTTCAGTGGTAGAATTCTCGCCTGCCACGCGGGAGGCCCGGGTTCGATTCCCGGCCCATGCAAAGTTTAGTCTTTTGGTTCTGAGGTTAACGTTCCCATCCA	151	.....((.((.(.((((((....((((.((((.((((((.((((((((......(((((((.........))))))).((((((...((....)).)))))))))))))).(((......))))))))).))))))))))))))))).)).	GCATGGGTGGTTCAGTGGTAGAATTCTCGC	Other	30	ExactMatch	71	37	52	62	776	684	779	630	779	433	340	696	726.35	556.115	718.123	771.615	4721.54	4214.13	3149.84	3209.32	3493.79	2709.48	2219.81	3441.44	5.51071	0.000197098	0.00231764	-1.28903	0.132639	0.399506	4.27509	0.000329377	0.00405566
AS-tDR-007235	-	-	pre-chr13.trna2246-GlyGCC	41	70	GTACAGGCTGTGTGAGCGTCAGATAGCACTTACAGCCAGGGCATGGGTGGTTCAGTGGTAGAATTCTCGCCTGCCACGCGGGAGGCCCGGGTTCGATTCCCGGCCCATGCAAAGTTTAGTCTTTTGGTTCTGAGGTTAACGTTCCCATCCA	151	.....((.((.(.((((((....((((.((((.((((((.((((((((......(((((((.........))))))).((((((...((....)).)))))))))))))).(((......))))))))).))))))))))))))))).)).	GCATGGGTGGTTCAGTGGTAGAATTCTCGT	Other	30	30C>T	89	45	53	69	743	642	779	630	836	451	286	559	910.495	676.356	731.933	858.732	4520.76	3955.37	3149.84	3209.32	3749.43	2822.12	1867.26	2764.03	4.66422	0.00011978	0.00154282	-1.32413	0.121995	0.399506	3.52248	0.00207869	0.015837
AS-tDR-007336	-	-	pre-chr13.trna2246-GlyGCC	41	71	GTACAGGCTGTGTGAGCGTCAGATAGCACTTACAGCCAGGGCATGGGTGGTTCAGTGGTAGAATTCTCGCCTGCCACGCGGGAGGCCCGGGTTCGATTCCCGGCCCATGCAAAGTTTAGTCTTTTGGTTCTGAGGTTAACGTTCCCATCCA	151	.....((.((.(.((((((....((((.((((.((((((.((((((((......(((((((.........))))))).((((((...((....)).)))))))))))))).(((......))))))))).))))))))))))))))).)).	GCATGGGTGGTTCAGTGGTAGAATTCTCGCA	Other	31	31C>A	193	124	135	162	3318	3385	4044	3260	3116	2135	1886	3577	1974.44	1863.74	1864.36	2016.15	20188.3	20855	16351.7	16607	13975.2	13359.7	12313.4	17686.8	9.58292	7.99966e-06	0.000335961	-1.29067	0.0457345	0.253897	7.42476	4.14189e-05	0.00110152
AS-tDR-000009	-	-	pre-chr13.trna2246-GlyGCC	41	71	GTACAGGCTGTGTGAGCGTCAGATAGCACTTACAGCCAGGGCATGGGTGGTTCAGTGGTAGAATTCTCGCCTGCCACGCGGGAGGCCCGGGTTCGATTCCCGGCCCATGCAAAGTTTAGTCTTTTGGTTCTGAGGTTAACGTTCCCATCCA	151	.....((.((.(.((((((....((((.((((.((((((.((((((((......(((((((.........))))))).((((((...((....)).)))))))))))))).(((......))))))))).))))))))))))))))).)).	GCATGGGTGGTTCAGTGGTAGAATTCTCGCC	Other	31	ExactMatch	471	246	312	357	8973	8370	10291	7299	7409	5370	4967	10118	4818.46	3697.41	4308.74	4443.01	54595.9	51567.7	41611.1	37182.3	33229.1	33602.6	32428.9	50029.4	10.709	5.14505e-05	0.000908959	-1.2389	0.181443	0.450773	8.64389	0.000239525	0.00355151
AS-tDR-007328	-	-	pre-chr13.trna2246-GlyGCC	41	71	GTACAGGCTGTGTGAGCGTCAGATAGCACTTACAGCCAGGGCATGGGTGGTTCAGTGGTAGAATTCTCGCCTGCCACGCGGGAGGCCCGGGTTCGATTCCCGGCCCATGCAAAGTTTAGTCTTTTGGTTCTGAGGTTAACGTTCCCATCCA	151	.....((.((.(.((((((....((((.((((.((((((.((((((((......(((((((.........))))))).((((((...((....)).)))))))))))))).(((......))))))))).))))))))))))))))).)).	GCATGGGTGGTTCAGTGGTAGAATTCTCGCT	Other	31	31C>T	570	323	410	439	10259	10041	11520	8848	9067	6392	5299	10886	5831.26	4854.73	5662.12	5463.53	62420.5	61862.7	46580.5	45073.2	40665.2	39997.7	34596.5	53826.9	9.89844	4.97679e-05	0.000908543	-1.27707	0.109727	0.392423	7.75087	0.000105118	0.00222207
AS-tDR-001289	-	-	pre-chr13.trna2246-GlyGCC	41	72	GTACAGGCTGTGTGAGCGTCAGATAGCACTTACAGCCAGGGCATGGGTGGTTCAGTGGTAGAATTCTCGCCTGCCACGCGGGAGGCCCGGGTTCGATTCCCGGCCCATGCAAAGTTTAGTCTTTTGGTTCTGAGGTTAACGTTCCCATCCA	151	.....((.((.(.((((((....((((.((((.((((((.((((((((......(((((((.........))))))).((((((...((....)).)))))))))))))).(((......))))))))).))))))))))))))))).)).	GCATGGGTGGTTCAGTGGTAGAATTCTCGCCT	Other	32	ExactMatch	774	482	694	730	1676	1776	2042	2409	2946	1643	1678	2421	7918.24	7244.53	9584.18	9085.14	10197.6	10942	8256.71	12271.8	13212.7	10281	10955.4	11970.9	1.23159	0.0962409	0.139387	1.11403	0.30263	0.611446	1.37203	0.00918402	0.0343085
AS-tDR-005360	-	-	pre-chr13.trna2246-GlyGCC	56	71	GTACAGGCTGTGTGAGCGTCAGATAGCACTTACAGCCAGGGCATGGGTGGTTCAGTGGTAGAATTCTCGCCTGCCACGCGGGAGGCCCGGGTTCGATTCCCGGCCCATGCAAAGTTTAGTCTTTTGGTTCTGAGGTTAACGTTCCCATCCA	151	.....((.((.(.((((((....((((.((((.((((((.((((((((......(((((((.........))))))).((((((...((....)).)))))))))))))).(((......))))))))).))))))))))))))))).)).	TGGTAGAATTCTCGCC	Other	16	ExactMatch	813	596	527	514	290	506	748	271	597	805	816	882	8317.22	8957.96	7277.9	6396.93	1764.49	3117.47	3024.5	1380.52	2677.53	5037.26	5327.55	4361.13	-3.33162	0.000278014	0.00269681	1.87359	0.0334347	0.245845	-1.7782	0.00612978	0.0269431
AS-tDR-009969	-	-	pre-chr13.trna2246-GlyGCC	56	71	GTACAGGCTGTGTGAGCGTCAGATAGCACTTACAGCCAGGGCATGGGTGGTTCAGTGGTAGAATTCTCGCCTGCCACGCGGGAGGCCCGGGTTCGATTCCCGGCCCATGCAAAGTTTAGTCTTTTGGTTCTGAGGTTAACGTTCCCATCCA	151	.....((.((.(.((((((....((((.((((.((((((.((((((((......(((((((.........))))))).((((((...((....)).)))))))))))))).(((......))))))))).))))))))))))))))).)).	TGGTAGAATTCTCGCT	Other	16	16C>T	963	769	594	606	359	540	843	342	704	905	858	933	9851.76	11558.2	8203.17	7541.91	2184.32	3326.95	3408.62	1742.2	3157.42	5663.01	5601.77	4613.31	-3.48384	0.000542026	0.00412956	1.78505	0.0267969	0.245845	-1.95168	0.00554618	0.0262757
AS-tDR-000660	-	-	pre-chr13.trna2377-GlyGCC	41	70	GGGCAGGCTGTGAGAGCATCAGGTAGTAAGTGTGTTCAGGGCATGGGTGGTTCAGTGGTAGAATTCTCGCCTGCCACGCGGGAGGCCCGGGTTCGATTCCCGGCCCATGCAGAGTCCAGTCCCTTTTGGTCCTCACGCGCACCTTCCCTTC	151	(((.(((.((((.(((.((((((.((..(.((..(((...((((((((......(((((((.........))))))).((((((...((....)).)))))))))))))).)))..)).)..)))))))).)))...))))))).)))...	GCATGGGTGGTTCAGTGGTAGAATTCTCGC	Other	30	ExactMatch	71	37	52	62	776	684	779	630	779	433	340	696	726.35	556.115	718.123	771.615	4721.54	4214.13	3149.84	3209.32	3493.79	2709.48	2219.81	3441.44	5.51071	0.000197098	0.00231764	-1.28903	0.132639	0.399506	4.27509	0.000329377	0.00405566
AS-tDR-007235	-	-	pre-chr13.trna2377-GlyGCC	41	70	GGGCAGGCTGTGAGAGCATCAGGTAGTAAGTGTGTTCAGGGCATGGGTGGTTCAGTGGTAGAATTCTCGCCTGCCACGCGGGAGGCCCGGGTTCGATTCCCGGCCCATGCAGAGTCCAGTCCCTTTTGGTCCTCACGCGCACCTTCCCTTC	151	(((.(((.((((.(((.((((((.((..(.((..(((...((((((((......(((((((.........))))))).((((((...((....)).)))))))))))))).)))..)).)..)))))))).)))...))))))).)))...	GCATGGGTGGTTCAGTGGTAGAATTCTCGT	Other	30	30C>T	89	45	53	69	743	642	779	630	836	451	286	559	910.495	676.356	731.933	858.732	4520.76	3955.37	3149.84	3209.32	3749.43	2822.12	1867.26	2764.03	4.66422	0.00011978	0.00154282	-1.32413	0.121995	0.399506	3.52248	0.00207869	0.015837
AS-tDR-007336	-	-	pre-chr13.trna2377-GlyGCC	41	71	GGGCAGGCTGTGAGAGCATCAGGTAGTAAGTGTGTTCAGGGCATGGGTGGTTCAGTGGTAGAATTCTCGCCTGCCACGCGGGAGGCCCGGGTTCGATTCCCGGCCCATGCAGAGTCCAGTCCCTTTTGGTCCTCACGCGCACCTTCCCTTC	151	(((.(((.((((.(((.((((((.((..(.((..(((...((((((((......(((((((.........))))))).((((((...((....)).)))))))))))))).)))..)).)..)))))))).)))...))))))).)))...	GCATGGGTGGTTCAGTGGTAGAATTCTCGCA	Other	31	31C>A	193	124	135	162	3318	3385	4044	3260	3116	2135	1886	3577	1974.44	1863.74	1864.36	2016.15	20188.3	20855	16351.7	16607	13975.2	13359.7	12313.4	17686.8	9.58292	7.99966e-06	0.000335961	-1.29067	0.0457345	0.253897	7.42476	4.14189e-05	0.00110152
AS-tDR-000009	-	-	pre-chr13.trna2377-GlyGCC	41	71	GGGCAGGCTGTGAGAGCATCAGGTAGTAAGTGTGTTCAGGGCATGGGTGGTTCAGTGGTAGAATTCTCGCCTGCCACGCGGGAGGCCCGGGTTCGATTCCCGGCCCATGCAGAGTCCAGTCCCTTTTGGTCCTCACGCGCACCTTCCCTTC	151	(((.(((.((((.(((.((((((.((..(.((..(((...((((((((......(((((((.........))))))).((((((...((....)).)))))))))))))).)))..)).)..)))))))).)))...))))))).)))...	GCATGGGTGGTTCAGTGGTAGAATTCTCGCC	Other	31	ExactMatch	471	246	312	357	8973	8370	10291	7299	7409	5370	4967	10118	4818.46	3697.41	4308.74	4443.01	54595.9	51567.7	41611.1	37182.3	33229.1	33602.6	32428.9	50029.4	10.709	5.14505e-05	0.000908959	-1.2389	0.181443	0.450773	8.64389	0.000239525	0.00355151
AS-tDR-007328	-	-	pre-chr13.trna2377-GlyGCC	41	71	GGGCAGGCTGTGAGAGCATCAGGTAGTAAGTGTGTTCAGGGCATGGGTGGTTCAGTGGTAGAATTCTCGCCTGCCACGCGGGAGGCCCGGGTTCGATTCCCGGCCCATGCAGAGTCCAGTCCCTTTTGGTCCTCACGCGCACCTTCCCTTC	151	(((.(((.((((.(((.((((((.((..(.((..(((...((((((((......(((((((.........))))))).((((((...((....)).)))))))))))))).)))..)).)..)))))))).)))...))))))).)))...	GCATGGGTGGTTCAGTGGTAGAATTCTCGCT	Other	31	31C>T	570	323	410	439	10259	10041	11520	8848	9067	6392	5299	10886	5831.26	4854.73	5662.12	5463.53	62420.5	61862.7	46580.5	45073.2	40665.2	39997.7	34596.5	53826.9	9.89844	4.97679e-05	0.000908543	-1.27707	0.109727	0.392423	7.75087	0.000105118	0.00222207
AS-tDR-001289	-	-	pre-chr13.trna2377-GlyGCC	41	72	GGGCAGGCTGTGAGAGCATCAGGTAGTAAGTGTGTTCAGGGCATGGGTGGTTCAGTGGTAGAATTCTCGCCTGCCACGCGGGAGGCCCGGGTTCGATTCCCGGCCCATGCAGAGTCCAGTCCCTTTTGGTCCTCACGCGCACCTTCCCTTC	151	(((.(((.((((.(((.((((((.((..(.((..(((...((((((((......(((((((.........))))))).((((((...((....)).)))))))))))))).)))..)).)..)))))))).)))...))))))).)))...	GCATGGGTGGTTCAGTGGTAGAATTCTCGCCT	Other	32	ExactMatch	774	482	694	730	1676	1776	2042	2409	2946	1643	1678	2421	7918.24	7244.53	9584.18	9085.14	10197.6	10942	8256.71	12271.8	13212.7	10281	10955.4	11970.9	1.23159	0.0962409	0.139387	1.11403	0.30263	0.611446	1.37203	0.00918402	0.0343085
AS-tDR-005360	-	-	pre-chr13.trna2377-GlyGCC	56	71	GGGCAGGCTGTGAGAGCATCAGGTAGTAAGTGTGTTCAGGGCATGGGTGGTTCAGTGGTAGAATTCTCGCCTGCCACGCGGGAGGCCCGGGTTCGATTCCCGGCCCATGCAGAGTCCAGTCCCTTTTGGTCCTCACGCGCACCTTCCCTTC	151	(((.(((.((((.(((.((((((.((..(.((..(((...((((((((......(((((((.........))))))).((((((...((....)).)))))))))))))).)))..)).)..)))))))).)))...))))))).)))...	TGGTAGAATTCTCGCC	Other	16	ExactMatch	813	596	527	514	290	506	748	271	597	805	816	882	8317.22	8957.96	7277.9	6396.93	1764.49	3117.47	3024.5	1380.52	2677.53	5037.26	5327.55	4361.13	-3.33162	0.000278014	0.00269681	1.87359	0.0334347	0.245845	-1.7782	0.00612978	0.0269431
AS-tDR-009969	-	-	pre-chr13.trna2377-GlyGCC	56	71	GGGCAGGCTGTGAGAGCATCAGGTAGTAAGTGTGTTCAGGGCATGGGTGGTTCAGTGGTAGAATTCTCGCCTGCCACGCGGGAGGCCCGGGTTCGATTCCCGGCCCATGCAGAGTCCAGTCCCTTTTGGTCCTCACGCGCACCTTCCCTTC	151	(((.(((.((((.(((.((((((.((..(.((..(((...((((((((......(((((((.........))))))).((((((...((....)).)))))))))))))).)))..)).)..)))))))).)))...))))))).)))...	TGGTAGAATTCTCGCT	Other	16	16C>T	963	769	594	606	359	540	843	342	704	905	858	933	9851.76	11558.2	8203.17	7541.91	2184.32	3326.95	3408.62	1742.2	3157.42	5663.01	5601.77	4613.31	-3.48384	0.000542026	0.00412956	1.78505	0.0267969	0.245845	-1.95168	0.00554618	0.0262757
AS-tDR-000660	-	-	chr13.trna2376-GlyGCC	1	30	GCATGGGTGGTTCAGTGGTAGAATTCTCGCCTGCCACGCGGGAGGTCCGGGTTCGATTCCCGGCCCATGCACCA	74	)))))))..)))).......((((.))))).......(((((....))))).......((((((((((((.	GCATGGGTGGTTCAGTGGTAGAATTCTCGC	tRF-5	30	ExactMatch	71	37	52	62	776	684	779	630	779	433	340	696	726.35	556.115	718.123	771.615	4721.54	4214.13	3149.84	3209.32	3493.79	2709.48	2219.81	3441.44	5.51071	0.000197098	0.00231764	-1.28903	0.132639	0.399506	4.27509	0.000329377	0.00405566
AS-tDR-007235	-	-	chr13.trna2376-GlyGCC	1	30	GCATGGGTGGTTCAGTGGTAGAATTCTCGCCTGCCACGCGGGAGGTCCGGGTTCGATTCCCGGCCCATGCACCA	74	)))))))..)))).......((((.))))).......(((((....))))).......((((((((((((.	GCATGGGTGGTTCAGTGGTAGAATTCTCGT	tRF-5	30	30C>T	89	45	53	69	743	642	779	630	836	451	286	559	910.495	676.356	731.933	858.732	4520.76	3955.37	3149.84	3209.32	3749.43	2822.12	1867.26	2764.03	4.66422	0.00011978	0.00154282	-1.32413	0.121995	0.399506	3.52248	0.00207869	0.015837
AS-tDR-007336	-	-	chr13.trna2376-GlyGCC	1	31	GCATGGGTGGTTCAGTGGTAGAATTCTCGCCTGCCACGCGGGAGGTCCGGGTTCGATTCCCGGCCCATGCACCA	74	)))))))..)))).......((((.))))).......(((((....))))).......((((((((((((.	GCATGGGTGGTTCAGTGGTAGAATTCTCGCA	tiRNA-5	31	31C>A	193	124	135	162	3318	3385	4044	3260	3116	2135	1886	3577	1974.44	1863.74	1864.36	2016.15	20188.3	20855	16351.7	16607	13975.2	13359.7	12313.4	17686.8	9.58292	7.99966e-06	0.000335961	-1.29067	0.0457345	0.253897	7.42476	4.14189e-05	0.00110152
AS-tDR-000009	-	-	chr13.trna2376-GlyGCC	1	31	GCATGGGTGGTTCAGTGGTAGAATTCTCGCCTGCCACGCGGGAGGTCCGGGTTCGATTCCCGGCCCATGCACCA	74	)))))))..)))).......((((.))))).......(((((....))))).......((((((((((((.	GCATGGGTGGTTCAGTGGTAGAATTCTCGCC	tiRNA-5	31	ExactMatch	471	246	312	357	8973	8370	10291	7299	7409	5370	4967	10118	4818.46	3697.41	4308.74	4443.01	54595.9	51567.7	41611.1	37182.3	33229.1	33602.6	32428.9	50029.4	10.709	5.14505e-05	0.000908959	-1.2389	0.181443	0.450773	8.64389	0.000239525	0.00355151
AS-tDR-007328	-	-	chr13.trna2376-GlyGCC	1	31	GCATGGGTGGTTCAGTGGTAGAATTCTCGCCTGCCACGCGGGAGGTCCGGGTTCGATTCCCGGCCCATGCACCA	74	)))))))..)))).......((((.))))).......(((((....))))).......((((((((((((.	GCATGGGTGGTTCAGTGGTAGAATTCTCGCT	tiRNA-5	31	31C>T	570	323	410	439	10259	10041	11520	8848	9067	6392	5299	10886	5831.26	4854.73	5662.12	5463.53	62420.5	61862.7	46580.5	45073.2	40665.2	39997.7	34596.5	53826.9	9.89844	4.97679e-05	0.000908543	-1.27707	0.109727	0.392423	7.75087	0.000105118	0.00222207
AS-tDR-001289	-	-	chr13.trna2376-GlyGCC	1	32	GCATGGGTGGTTCAGTGGTAGAATTCTCGCCTGCCACGCGGGAGGTCCGGGTTCGATTCCCGGCCCATGCACCA	74	)))))))..)))).......((((.))))).......(((((....))))).......((((((((((((.	GCATGGGTGGTTCAGTGGTAGAATTCTCGCCT	tiRNA-5	32	ExactMatch	774	482	694	730	1676	1776	2042	2409	2946	1643	1678	2421	7918.24	7244.53	9584.18	9085.14	10197.6	10942	8256.71	12271.8	13212.7	10281	10955.4	11970.9	1.23159	0.0962409	0.139387	1.11403	0.30263	0.611446	1.37203	0.00918402	0.0343085
AS-tDR-005360	-	-	chr13.trna2376-GlyGCC	16	31	GCATGGGTGGTTCAGTGGTAGAATTCTCGCCTGCCACGCGGGAGGTCCGGGTTCGATTCCCGGCCCATGCACCA	74	)))))))..)))).......((((.))))).......(((((....))))).......((((((((((((.	TGGTAGAATTCTCGCC	i-tRF	16	ExactMatch	813	596	527	514	290	506	748	271	597	805	816	882	8317.22	8957.96	7277.9	6396.93	1764.49	3117.47	3024.5	1380.52	2677.53	5037.26	5327.55	4361.13	-3.33162	0.000278014	0.00269681	1.87359	0.0334347	0.245845	-1.7782	0.00612978	0.0269431
AS-tDR-009969	-	-	chr13.trna2376-GlyGCC	16	31	GCATGGGTGGTTCAGTGGTAGAATTCTCGCCTGCCACGCGGGAGGTCCGGGTTCGATTCCCGGCCCATGCACCA	74	)))))))..)))).......((((.))))).......(((((....))))).......((((((((((((.	TGGTAGAATTCTCGCT	i-tRF	16	16C>T	963	769	594	606	359	540	843	342	704	905	858	933	9851.76	11558.2	8203.17	7541.91	2184.32	3326.95	3408.62	1742.2	3157.42	5663.01	5601.77	4613.31	-3.48384	0.000542026	0.00412956	1.78505	0.0267969	0.245845	-1.95168	0.00554618	0.0262757
AS-tDR-000660	-	-	pre-chr13.trna2376-GlyGCC	41	70	GGGCAGGCTGTGAGAGCATCAGGTAGTAAGTGTGTTCAGGGCATGGGTGGTTCAGTGGTAGAATTCTCGCCTGCCACGCGGGAGGTCCGGGTTCGATTCCCGGCCCATGCAGAGTCCAGTCCCTTTTGGTCCTCACGCGCACCTTCCCTTC	151	(((.(((.((((.(((.((((((.((..(.((..(((...((((((((......(((((((.........))))))).((((((...((....)).)))))))))))))).)))..)).)..)))))))).)))...))))))).)))...	GCATGGGTGGTTCAGTGGTAGAATTCTCGC	Other	30	ExactMatch	71	37	52	62	776	684	779	630	779	433	340	696	726.35	556.115	718.123	771.615	4721.54	4214.13	3149.84	3209.32	3493.79	2709.48	2219.81	3441.44	5.51071	0.000197098	0.00231764	-1.28903	0.132639	0.399506	4.27509	0.000329377	0.00405566
AS-tDR-007235	-	-	pre-chr13.trna2376-GlyGCC	41	70	GGGCAGGCTGTGAGAGCATCAGGTAGTAAGTGTGTTCAGGGCATGGGTGGTTCAGTGGTAGAATTCTCGCCTGCCACGCGGGAGGTCCGGGTTCGATTCCCGGCCCATGCAGAGTCCAGTCCCTTTTGGTCCTCACGCGCACCTTCCCTTC	151	(((.(((.((((.(((.((((((.((..(.((..(((...((((((((......(((((((.........))))))).((((((...((....)).)))))))))))))).)))..)).)..)))))))).)))...))))))).)))...	GCATGGGTGGTTCAGTGGTAGAATTCTCGT	Other	30	30C>T	89	45	53	69	743	642	779	630	836	451	286	559	910.495	676.356	731.933	858.732	4520.76	3955.37	3149.84	3209.32	3749.43	2822.12	1867.26	2764.03	4.66422	0.00011978	0.00154282	-1.32413	0.121995	0.399506	3.52248	0.00207869	0.015837
AS-tDR-007336	-	-	pre-chr13.trna2376-GlyGCC	41	71	GGGCAGGCTGTGAGAGCATCAGGTAGTAAGTGTGTTCAGGGCATGGGTGGTTCAGTGGTAGAATTCTCGCCTGCCACGCGGGAGGTCCGGGTTCGATTCCCGGCCCATGCAGAGTCCAGTCCCTTTTGGTCCTCACGCGCACCTTCCCTTC	151	(((.(((.((((.(((.((((((.((..(.((..(((...((((((((......(((((((.........))))))).((((((...((....)).)))))))))))))).)))..)).)..)))))))).)))...))))))).)))...	GCATGGGTGGTTCAGTGGTAGAATTCTCGCA	Other	31	31C>A	193	124	135	162	3318	3385	4044	3260	3116	2135	1886	3577	1974.44	1863.74	1864.36	2016.15	20188.3	20855	16351.7	16607	13975.2	13359.7	12313.4	17686.8	9.58292	7.99966e-06	0.000335961	-1.29067	0.0457345	0.253897	7.42476	4.14189e-05	0.00110152
AS-tDR-000009	-	-	pre-chr13.trna2376-GlyGCC	41	71	GGGCAGGCTGTGAGAGCATCAGGTAGTAAGTGTGTTCAGGGCATGGGTGGTTCAGTGGTAGAATTCTCGCCTGCCACGCGGGAGGTCCGGGTTCGATTCCCGGCCCATGCAGAGTCCAGTCCCTTTTGGTCCTCACGCGCACCTTCCCTTC	151	(((.(((.((((.(((.((((((.((..(.((..(((...((((((((......(((((((.........))))))).((((((...((....)).)))))))))))))).)))..)).)..)))))))).)))...))))))).)))...	GCATGGGTGGTTCAGTGGTAGAATTCTCGCC	Other	31	ExactMatch	471	246	312	357	8973	8370	10291	7299	7409	5370	4967	10118	4818.46	3697.41	4308.74	4443.01	54595.9	51567.7	41611.1	37182.3	33229.1	33602.6	32428.9	50029.4	10.709	5.14505e-05	0.000908959	-1.2389	0.181443	0.450773	8.64389	0.000239525	0.00355151
AS-tDR-007328	-	-	pre-chr13.trna2376-GlyGCC	41	71	GGGCAGGCTGTGAGAGCATCAGGTAGTAAGTGTGTTCAGGGCATGGGTGGTTCAGTGGTAGAATTCTCGCCTGCCACGCGGGAGGTCCGGGTTCGATTCCCGGCCCATGCAGAGTCCAGTCCCTTTTGGTCCTCACGCGCACCTTCCCTTC	151	(((.(((.((((.(((.((((((.((..(.((..(((...((((((((......(((((((.........))))))).((((((...((....)).)))))))))))))).)))..)).)..)))))))).)))...))))))).)))...	GCATGGGTGGTTCAGTGGTAGAATTCTCGCT	Other	31	31C>T	570	323	410	439	10259	10041	11520	8848	9067	6392	5299	10886	5831.26	4854.73	5662.12	5463.53	62420.5	61862.7	46580.5	45073.2	40665.2	39997.7	34596.5	53826.9	9.89844	4.97679e-05	0.000908543	-1.27707	0.109727	0.392423	7.75087	0.000105118	0.00222207
AS-tDR-001289	-	-	pre-chr13.trna2376-GlyGCC	41	72	GGGCAGGCTGTGAGAGCATCAGGTAGTAAGTGTGTTCAGGGCATGGGTGGTTCAGTGGTAGAATTCTCGCCTGCCACGCGGGAGGTCCGGGTTCGATTCCCGGCCCATGCAGAGTCCAGTCCCTTTTGGTCCTCACGCGCACCTTCCCTTC	151	(((.(((.((((.(((.((((((.((..(.((..(((...((((((((......(((((((.........))))))).((((((...((....)).)))))))))))))).)))..)).)..)))))))).)))...))))))).)))...	GCATGGGTGGTTCAGTGGTAGAATTCTCGCCT	Other	32	ExactMatch	774	482	694	730	1676	1776	2042	2409	2946	1643	1678	2421	7918.24	7244.53	9584.18	9085.14	10197.6	10942	8256.71	12271.8	13212.7	10281	10955.4	11970.9	1.23159	0.0962409	0.139387	1.11403	0.30263	0.611446	1.37203	0.00918402	0.0343085
AS-tDR-005360	-	-	pre-chr13.trna2376-GlyGCC	56	71	GGGCAGGCTGTGAGAGCATCAGGTAGTAAGTGTGTTCAGGGCATGGGTGGTTCAGTGGTAGAATTCTCGCCTGCCACGCGGGAGGTCCGGGTTCGATTCCCGGCCCATGCAGAGTCCAGTCCCTTTTGGTCCTCACGCGCACCTTCCCTTC	151	(((.(((.((((.(((.((((((.((..(.((..(((...((((((((......(((((((.........))))))).((((((...((....)).)))))))))))))).)))..)).)..)))))))).)))...))))))).)))...	TGGTAGAATTCTCGCC	Other	16	ExactMatch	813	596	527	514	290	506	748	271	597	805	816	882	8317.22	8957.96	7277.9	6396.93	1764.49	3117.47	3024.5	1380.52	2677.53	5037.26	5327.55	4361.13	-3.33162	0.000278014	0.00269681	1.87359	0.0334347	0.245845	-1.7782	0.00612978	0.0269431
AS-tDR-009969	-	-	pre-chr13.trna2376-GlyGCC	56	71	GGGCAGGCTGTGAGAGCATCAGGTAGTAAGTGTGTTCAGGGCATGGGTGGTTCAGTGGTAGAATTCTCGCCTGCCACGCGGGAGGTCCGGGTTCGATTCCCGGCCCATGCAGAGTCCAGTCCCTTTTGGTCCTCACGCGCACCTTCCCTTC	151	(((.(((.((((.(((.((((((.((..(.((..(((...((((((((......(((((((.........))))))).((((((...((....)).)))))))))))))).)))..)).)..)))))))).)))...))))))).)))...	TGGTAGAATTCTCGCT	Other	16	16C>T	963	769	594	606	359	540	843	342	704	905	858	933	9851.76	11558.2	8203.17	7541.91	2184.32	3326.95	3408.62	1742.2	3157.42	5663.01	5601.77	4613.31	-3.48384	0.000542026	0.00412956	1.78505	0.0267969	0.245845	-1.95168	0.00554618	0.0262757
AS-tDR-000544	-	-	chr1.trna17865-GluCTC	1	28	TCCCTGGTGGTCTAGTGGTTAGGATTCGGCGCTCTCACCGCCGCGGCCCGGGTTCGATTCCCGGTCAGGGAACCA	75	)))))))..))))........((((.))))).......(((((....))))).......((((((((((((.	TCCCTGGTGGTCTAGTGGTTAGGATTCG	tRF-5	28	ExactMatch	216	66	74	64	84	108	130	105	98	83	57	60	2209.74	991.989	1021.94	796.505	511.095	665.389	525.648	534.887	439.527	519.37	372.145	296.676	-2.24192	0.0754398	0.111198	-1.37341	0.0427215	0.245845	-3.07907	0.0404094	0.0811962
AS-tDR-000060	-	-	chr1.trna17865-GluCTC	1	31	TCCCTGGTGGTCTAGTGGTTAGGATTCGGCGCTCTCACCGCCGCGGCCCGGGTTCGATTCCCGGTCAGGGAACCA	75	)))))))..))))........((((.))))).......(((((....))))).......((((((((((((.	TCCCTGGTGGTCTAGTGGTTAGGATTCGGCG	tRF-5	31	ExactMatch	108	64	79	75	249	232	310	359	406	191	169	238	1104.87	961.929	1090.99	933.405	1515.03	1429.35	1253.47	1828.81	1820.9	1195.18	1103.38	1176.81	1.47262	0.00922023	0.0201184	-1.1378	0.408887	0.672621	1.29426	0.131262	0.193949
AS-tDR-007247	-	-	chr1.trna17865-GluCTC	1	32	TCCCTGGTGGTCTAGTGGTTAGGATTCGGCGCTCTCACCGCCGCGGCCCGGGTTCGATTCCCGGTCAGGGAACCA	75	)))))))..))))........((((.))))).......(((((....))))).......((((((((((((.	TCCCTGTGGTCTAGTGGTTAGGATTCGGCGCT	tiRNA-5	32	6-G	320	272	269	264	1494	1399	1743	2199	1892	1364	1248	1757	3273.69	4088.2	3714.91	3285.58	9090.19	8619.26	7047.72	11202.1	8485.56	8535.19	8148.02	8687.65	2.50329	0.000852021	0.00530147	-1.0621	0.565419	0.845823	2.35692	6.45936e-07	0.000134748
AS-tDR-008177	-	-	chr1.trna17865-GluCTC	1	33	TCCCTGGTGGTCTAGTGGTTAGGATTCGGCGCTCTCACCGCCGCGGCCCGGGTTCGATTCCCGGTCAGGGAACCA	75	)))))))..))))........((((.))))).......(((((....))))).......((((((((((((.	TCCCTGGTGGTCTAGTGGTTAGGATTCGGCGCA	tiRNA-5	33	33T>A	120	82	103	84	452	448	553	712	569	351	362	457	1227.63	1232.47	1422.44	1045.41	2750.18	2760.13	2236.02	3627.05	2551.95	2196.37	2363.45	2259.68	2.30687	0.00166875	0.00838977	-1.21353	0.144923	0.410438	1.90096	5.30737e-05	0.00129394
AS-tDR-007322	-	-	chr1.trna17865-GluCTC	1	33	TCCCTGGTGGTCTAGTGGTTAGGATTCGGCGCTCTCACCGCCGCGGCCCGGGTTCGATTCCCGGTCAGGGAACCA	75	)))))))..))))........((((.))))).......(((((....))))).......((((((((((((.	TCCCTGGTGGTCTAGTGGTTAGGATTCGGCGCC	tiRNA-5	33	33T>C	73	71	69	61	305	309	376	465	443	261	279	360	746.811	1067.14	952.894	759.169	1855.76	1903.75	1520.33	2368.79	1986.84	1633.2	1821.55	1780.05	2.16788	0.00167178	0.00838977	-1.05909	0.592731	0.86926	2.04692	0.000129543	0.00256074
AS-tDR-001260	-	-	chr1.trna17865-GluCTC	1	33	TCCCTGGTGGTCTAGTGGTTAGGATTCGGCGCTCTCACCGCCGCGGCCCGGGTTCGATTCCCGGTCAGGGAACCA	75	)))))))..))))........((((.))))).......(((((....))))).......((((((((((((.	TCCCTGGTGGTCTAGTGGTTAGGATTCGGCGCT	tiRNA-5	33	ExactMatch	598	443	447	433	2559	2159	2795	3500	2946	1992	2079	2801	6117.71	6658.35	6173.1	5388.86	15570.1	13301.6	11301.4	17829.6	13212.7	12464.9	13573.5	13849.8	2.38299	0.00108768	0.0064677	-1.09231	0.428243	0.689905	2.18162	1.85303e-06	0.000147316
AS-tDR-001262	-	-	chr1.trna17865-GluCTC	1	35	TCCCTGGTGGTCTAGTGGTTAGGATTCGGCGCTCTCACCGCCGCGGCCCGGGTTCGATTCCCGGTCAGGGAACCA	75	)))))))..))))........((((.))))).......(((((....))))).......((((((((((((.	TCCCTGGTGGTCTAGTGGTTAGGATTCGGCGCTCT	tiRNA-5	35	ExactMatch	111	113	77	125	299	274	451	451	307	218	324	188	1135.56	1698.41	1063.37	1555.67	1819.25	1688.12	1823.59	2297.47	1376.89	1364.13	2115.35	929.584	1.39865	0.0381262	0.060912	-1.31822	0.151135	0.416503	1.06101	0.784595	0.798126
AS-tDR-000550	-	-	chr1.trna17865-GluCTC	1	39	TCCCTGGTGGTCTAGTGGTTAGGATTCGGCGCTCTCACCGCCGCGGCCCGGGTTCGATTCCCGGTCAGGGAACCA	75	)))))))..))))........((((.))))).......(((((....))))).......((((((((((((.	TCCCTGGTGGTCTAGTGGTTAGGATTCGGCGCTCTCACC	tRF-5	39	ExactMatch	238	248	243	241	167	260	687	324	296	261	186	213	2434.81	3727.47	3355.84	2999.34	1016.11	1601.86	2777.85	1650.51	1327.55	1633.2	1214.37	1053.2	-1.77601	0.024762	0.0430598	-1.34746	0.285808	0.595895	-2.3931	0.000922231	0.00818592
AS-tDR-009999	-	-	chr1.trna17865-GluCTC	1	39	TCCCTGGTGGTCTAGTGGTTAGGATTCGGCGCTCTCACCGCCGCGGCCCGGGTTCGATTCCCGGTCAGGGAACCA	75	)))))))..))))........((((.))))).......(((((....))))).......((((((((((((.	TCCCTGGTGGTCTAGTGGTTAGGATTCGGCGCTCTCACT	tRF-5	39	39C>T	369	340	293	305	187	336	777	389	357	306	222	232	3774.97	5110.25	4046.35	3795.85	1137.79	2070.1	3141.76	1981.63	1601.13	1914.79	1449.41	1147.15	-2.0073	0.00670834	0.016279	-1.36276	0.254938	0.568828	-2.73547	0.000289847	0.00369328
AS-tDR-002583	-	-	chr1.trna17865-GluCTC	16	31	TCCCTGGTGGTCTAGTGGTTAGGATTCGGCGCTCTCACCGCCGCGGCCCGGGTTCGATTCCCGGTCAGGGAACCA	75	)))))))..))))........((((.))))).......(((((....))))).......((((((((((((.	TGGTTAGGATTCGGCG	i-tRF	16	ExactMatch	136	168	160	79	31	111	194	47	199	165	257	166	1391.32	2525.06	2209.61	983.186	188.618	683.872	784.428	239.426	892.509	1032.48	1677.92	820.803	-3.7431	0.0151823	0.0294857	2.32995	0.0434444	0.245845	-1.60651	0.149894	0.204844
AS-tDR-011670	-	-	chr1.trna17865-GluCTC	16	42	TCCCTGGTGGTCTAGTGGTTAGGATTCGGCGCTCTCACCGCCGCGGCCCGGGTTCGATTCCCGGTCAGGGAACCA	75	)))))))..))))........((((.))))).......(((((....))))).......((((((((((((.	TGGTTAGGATTCGGCGCTCTCACCGCT	i-tRF	27	27C>T	159	185	132	184	62	196	246	279	288	183	215	249	1626.62	2780.58	1822.93	2289.95	377.237	1207.56	994.687	1421.27	1291.67	1145.12	1403.71	1231.2	-2.12849	0.0163673	0.030965	1.26742	0.291679	0.596906	-1.67939	0.0169466	0.0515523
AS-tDR-000544	-	-	chr10.trna11803-GluCTC	1	28	TCCCTGGTGGTCTAGTGGTTAGGATTCGGCGCTCTCACCGCCGCGGCCCGGGTTCGATTCCCGGTCAGGGAACCA	75	)))))))..))))........((((.))))).......(((((....))))).......((((((((((((.	TCCCTGGTGGTCTAGTGGTTAGGATTCG	tRF-5	28	ExactMatch	216	66	74	64	84	108	130	105	98	83	57	60	2209.74	991.989	1021.94	796.505	511.095	665.389	525.648	534.887	439.527	519.37	372.145	296.676	-2.24192	0.0754398	0.111198	-1.37341	0.0427215	0.245845	-3.07907	0.0404094	0.0811962
AS-tDR-000060	-	-	chr10.trna11803-GluCTC	1	31	TCCCTGGTGGTCTAGTGGTTAGGATTCGGCGCTCTCACCGCCGCGGCCCGGGTTCGATTCCCGGTCAGGGAACCA	75	)))))))..))))........((((.))))).......(((((....))))).......((((((((((((.	TCCCTGGTGGTCTAGTGGTTAGGATTCGGCG	tRF-5	31	ExactMatch	108	64	79	75	249	232	310	359	406	191	169	238	1104.87	961.929	1090.99	933.405	1515.03	1429.35	1253.47	1828.81	1820.9	1195.18	1103.38	1176.81	1.47262	0.00922023	0.0201184	-1.1378	0.408887	0.672621	1.29426	0.131262	0.193949
AS-tDR-007247	-	-	chr10.trna11803-GluCTC	1	32	TCCCTGGTGGTCTAGTGGTTAGGATTCGGCGCTCTCACCGCCGCGGCCCGGGTTCGATTCCCGGTCAGGGAACCA	75	)))))))..))))........((((.))))).......(((((....))))).......((((((((((((.	TCCCTGTGGTCTAGTGGTTAGGATTCGGCGCT	tiRNA-5	32	6-G	320	272	269	264	1494	1399	1743	2199	1892	1364	1248	1757	3273.69	4088.2	3714.91	3285.58	9090.19	8619.26	7047.72	11202.1	8485.56	8535.19	8148.02	8687.65	2.50329	0.000852021	0.00530147	-1.0621	0.565419	0.845823	2.35692	6.45936e-07	0.000134748
AS-tDR-008177	-	-	chr10.trna11803-GluCTC	1	33	TCCCTGGTGGTCTAGTGGTTAGGATTCGGCGCTCTCACCGCCGCGGCCCGGGTTCGATTCCCGGTCAGGGAACCA	75	)))))))..))))........((((.))))).......(((((....))))).......((((((((((((.	TCCCTGGTGGTCTAGTGGTTAGGATTCGGCGCA	tiRNA-5	33	33T>A	120	82	103	84	452	448	553	712	569	351	362	457	1227.63	1232.47	1422.44	1045.41	2750.18	2760.13	2236.02	3627.05	2551.95	2196.37	2363.45	2259.68	2.30687	0.00166875	0.00838977	-1.21353	0.144923	0.410438	1.90096	5.30737e-05	0.00129394
AS-tDR-007322	-	-	chr10.trna11803-GluCTC	1	33	TCCCTGGTGGTCTAGTGGTTAGGATTCGGCGCTCTCACCGCCGCGGCCCGGGTTCGATTCCCGGTCAGGGAACCA	75	)))))))..))))........((((.))))).......(((((....))))).......((((((((((((.	TCCCTGGTGGTCTAGTGGTTAGGATTCGGCGCC	tiRNA-5	33	33T>C	73	71	69	61	305	309	376	465	443	261	279	360	746.811	1067.14	952.894	759.169	1855.76	1903.75	1520.33	2368.79	1986.84	1633.2	1821.55	1780.05	2.16788	0.00167178	0.00838977	-1.05909	0.592731	0.86926	2.04692	0.000129543	0.00256074
AS-tDR-001260	-	-	chr10.trna11803-GluCTC	1	33	TCCCTGGTGGTCTAGTGGTTAGGATTCGGCGCTCTCACCGCCGCGGCCCGGGTTCGATTCCCGGTCAGGGAACCA	75	)))))))..))))........((((.))))).......(((((....))))).......((((((((((((.	TCCCTGGTGGTCTAGTGGTTAGGATTCGGCGCT	tiRNA-5	33	ExactMatch	598	443	447	433	2559	2159	2795	3500	2946	1992	2079	2801	6117.71	6658.35	6173.1	5388.86	15570.1	13301.6	11301.4	17829.6	13212.7	12464.9	13573.5	13849.8	2.38299	0.00108768	0.0064677	-1.09231	0.428243	0.689905	2.18162	1.85303e-06	0.000147316
AS-tDR-001262	-	-	chr10.trna11803-GluCTC	1	35	TCCCTGGTGGTCTAGTGGTTAGGATTCGGCGCTCTCACCGCCGCGGCCCGGGTTCGATTCCCGGTCAGGGAACCA	75	)))))))..))))........((((.))))).......(((((....))))).......((((((((((((.	TCCCTGGTGGTCTAGTGGTTAGGATTCGGCGCTCT	tiRNA-5	35	ExactMatch	111	113	77	125	299	274	451	451	307	218	324	188	1135.56	1698.41	1063.37	1555.67	1819.25	1688.12	1823.59	2297.47	1376.89	1364.13	2115.35	929.584	1.39865	0.0381262	0.060912	-1.31822	0.151135	0.416503	1.06101	0.784595	0.798126
AS-tDR-000550	-	-	chr10.trna11803-GluCTC	1	39	TCCCTGGTGGTCTAGTGGTTAGGATTCGGCGCTCTCACCGCCGCGGCCCGGGTTCGATTCCCGGTCAGGGAACCA	75	)))))))..))))........((((.))))).......(((((....))))).......((((((((((((.	TCCCTGGTGGTCTAGTGGTTAGGATTCGGCGCTCTCACC	tRF-5	39	ExactMatch	238	248	243	241	167	260	687	324	296	261	186	213	2434.81	3727.47	3355.84	2999.34	1016.11	1601.86	2777.85	1650.51	1327.55	1633.2	1214.37	1053.2	-1.77601	0.024762	0.0430598	-1.34746	0.285808	0.595895	-2.3931	0.000922231	0.00818592
AS-tDR-009999	-	-	chr10.trna11803-GluCTC	1	39	TCCCTGGTGGTCTAGTGGTTAGGATTCGGCGCTCTCACCGCCGCGGCCCGGGTTCGATTCCCGGTCAGGGAACCA	75	)))))))..))))........((((.))))).......(((((....))))).......((((((((((((.	TCCCTGGTGGTCTAGTGGTTAGGATTCGGCGCTCTCACT	tRF-5	39	39C>T	369	340	293	305	187	336	777	389	357	306	222	232	3774.97	5110.25	4046.35	3795.85	1137.79	2070.1	3141.76	1981.63	1601.13	1914.79	1449.41	1147.15	-2.0073	0.00670834	0.016279	-1.36276	0.254938	0.568828	-2.73547	0.000289847	0.00369328
AS-tDR-002583	-	-	chr10.trna11803-GluCTC	16	31	TCCCTGGTGGTCTAGTGGTTAGGATTCGGCGCTCTCACCGCCGCGGCCCGGGTTCGATTCCCGGTCAGGGAACCA	75	)))))))..))))........((((.))))).......(((((....))))).......((((((((((((.	TGGTTAGGATTCGGCG	i-tRF	16	ExactMatch	136	168	160	79	31	111	194	47	199	165	257	166	1391.32	2525.06	2209.61	983.186	188.618	683.872	784.428	239.426	892.509	1032.48	1677.92	820.803	-3.7431	0.0151823	0.0294857	2.32995	0.0434444	0.245845	-1.60651	0.149894	0.204844
AS-tDR-011670	-	-	chr10.trna11803-GluCTC	16	42	TCCCTGGTGGTCTAGTGGTTAGGATTCGGCGCTCTCACCGCCGCGGCCCGGGTTCGATTCCCGGTCAGGGAACCA	75	)))))))..))))........((((.))))).......(((((....))))).......((((((((((((.	TGGTTAGGATTCGGCGCTCTCACCGCT	i-tRF	27	27C>T	159	185	132	184	62	196	246	279	288	183	215	249	1626.62	2780.58	1822.93	2289.95	377.237	1207.56	994.687	1421.27	1291.67	1145.12	1403.71	1231.2	-2.12849	0.0163673	0.030965	1.26742	0.291679	0.596906	-1.67939	0.0169466	0.0515523
AS-tDR-000544	-	-	chr13.trna2251-GluCTC	1	28	TCCCTGGTGGTCTAGTGGTTAGGATTCGGCGCTCTCACCGCCGCGGCCCGGGTTCGATTCCCGGTCAGGGAACCA	75	)))))))..))))........((((.))))).......(((((....))))).......((((((((((((.	TCCCTGGTGGTCTAGTGGTTAGGATTCG	tRF-5	28	ExactMatch	216	66	74	64	84	108	130	105	98	83	57	60	2209.74	991.989	1021.94	796.505	511.095	665.389	525.648	534.887	439.527	519.37	372.145	296.676	-2.24192	0.0754398	0.111198	-1.37341	0.0427215	0.245845	-3.07907	0.0404094	0.0811962
AS-tDR-000060	-	-	chr13.trna2251-GluCTC	1	31	TCCCTGGTGGTCTAGTGGTTAGGATTCGGCGCTCTCACCGCCGCGGCCCGGGTTCGATTCCCGGTCAGGGAACCA	75	)))))))..))))........((((.))))).......(((((....))))).......((((((((((((.	TCCCTGGTGGTCTAGTGGTTAGGATTCGGCG	tRF-5	31	ExactMatch	108	64	79	75	249	232	310	359	406	191	169	238	1104.87	961.929	1090.99	933.405	1515.03	1429.35	1253.47	1828.81	1820.9	1195.18	1103.38	1176.81	1.47262	0.00922023	0.0201184	-1.1378	0.408887	0.672621	1.29426	0.131262	0.193949
AS-tDR-007247	-	-	chr13.trna2251-GluCTC	1	32	TCCCTGGTGGTCTAGTGGTTAGGATTCGGCGCTCTCACCGCCGCGGCCCGGGTTCGATTCCCGGTCAGGGAACCA	75	)))))))..))))........((((.))))).......(((((....))))).......((((((((((((.	TCCCTGTGGTCTAGTGGTTAGGATTCGGCGCT	tiRNA-5	32	6-G	320	272	269	264	1494	1399	1743	2199	1892	1364	1248	1757	3273.69	4088.2	3714.91	3285.58	9090.19	8619.26	7047.72	11202.1	8485.56	8535.19	8148.02	8687.65	2.50329	0.000852021	0.00530147	-1.0621	0.565419	0.845823	2.35692	6.45936e-07	0.000134748
AS-tDR-008177	-	-	chr13.trna2251-GluCTC	1	33	TCCCTGGTGGTCTAGTGGTTAGGATTCGGCGCTCTCACCGCCGCGGCCCGGGTTCGATTCCCGGTCAGGGAACCA	75	)))))))..))))........((((.))))).......(((((....))))).......((((((((((((.	TCCCTGGTGGTCTAGTGGTTAGGATTCGGCGCA	tiRNA-5	33	33T>A	120	82	103	84	452	448	553	712	569	351	362	457	1227.63	1232.47	1422.44	1045.41	2750.18	2760.13	2236.02	3627.05	2551.95	2196.37	2363.45	2259.68	2.30687	0.00166875	0.00838977	-1.21353	0.144923	0.410438	1.90096	5.30737e-05	0.00129394
AS-tDR-007322	-	-	chr13.trna2251-GluCTC	1	33	TCCCTGGTGGTCTAGTGGTTAGGATTCGGCGCTCTCACCGCCGCGGCCCGGGTTCGATTCCCGGTCAGGGAACCA	75	)))))))..))))........((((.))))).......(((((....))))).......((((((((((((.	TCCCTGGTGGTCTAGTGGTTAGGATTCGGCGCC	tiRNA-5	33	33T>C	73	71	69	61	305	309	376	465	443	261	279	360	746.811	1067.14	952.894	759.169	1855.76	1903.75	1520.33	2368.79	1986.84	1633.2	1821.55	1780.05	2.16788	0.00167178	0.00838977	-1.05909	0.592731	0.86926	2.04692	0.000129543	0.00256074
AS-tDR-001260	-	-	chr13.trna2251-GluCTC	1	33	TCCCTGGTGGTCTAGTGGTTAGGATTCGGCGCTCTCACCGCCGCGGCCCGGGTTCGATTCCCGGTCAGGGAACCA	75	)))))))..))))........((((.))))).......(((((....))))).......((((((((((((.	TCCCTGGTGGTCTAGTGGTTAGGATTCGGCGCT	tiRNA-5	33	ExactMatch	598	443	447	433	2559	2159	2795	3500	2946	1992	2079	2801	6117.71	6658.35	6173.1	5388.86	15570.1	13301.6	11301.4	17829.6	13212.7	12464.9	13573.5	13849.8	2.38299	0.00108768	0.0064677	-1.09231	0.428243	0.689905	2.18162	1.85303e-06	0.000147316
AS-tDR-001262	-	-	chr13.trna2251-GluCTC	1	35	TCCCTGGTGGTCTAGTGGTTAGGATTCGGCGCTCTCACCGCCGCGGCCCGGGTTCGATTCCCGGTCAGGGAACCA	75	)))))))..))))........((((.))))).......(((((....))))).......((((((((((((.	TCCCTGGTGGTCTAGTGGTTAGGATTCGGCGCTCT	tiRNA-5	35	ExactMatch	111	113	77	125	299	274	451	451	307	218	324	188	1135.56	1698.41	1063.37	1555.67	1819.25	1688.12	1823.59	2297.47	1376.89	1364.13	2115.35	929.584	1.39865	0.0381262	0.060912	-1.31822	0.151135	0.416503	1.06101	0.784595	0.798126
AS-tDR-000550	-	-	chr13.trna2251-GluCTC	1	39	TCCCTGGTGGTCTAGTGGTTAGGATTCGGCGCTCTCACCGCCGCGGCCCGGGTTCGATTCCCGGTCAGGGAACCA	75	)))))))..))))........((((.))))).......(((((....))))).......((((((((((((.	TCCCTGGTGGTCTAGTGGTTAGGATTCGGCGCTCTCACC	tRF-5	39	ExactMatch	238	248	243	241	167	260	687	324	296	261	186	213	2434.81	3727.47	3355.84	2999.34	1016.11	1601.86	2777.85	1650.51	1327.55	1633.2	1214.37	1053.2	-1.77601	0.024762	0.0430598	-1.34746	0.285808	0.595895	-2.3931	0.000922231	0.00818592
AS-tDR-009999	-	-	chr13.trna2251-GluCTC	1	39	TCCCTGGTGGTCTAGTGGTTAGGATTCGGCGCTCTCACCGCCGCGGCCCGGGTTCGATTCCCGGTCAGGGAACCA	75	)))))))..))))........((((.))))).......(((((....))))).......((((((((((((.	TCCCTGGTGGTCTAGTGGTTAGGATTCGGCGCTCTCACT	tRF-5	39	39C>T	369	340	293	305	187	336	777	389	357	306	222	232	3774.97	5110.25	4046.35	3795.85	1137.79	2070.1	3141.76	1981.63	1601.13	1914.79	1449.41	1147.15	-2.0073	0.00670834	0.016279	-1.36276	0.254938	0.568828	-2.73547	0.000289847	0.00369328
AS-tDR-002583	-	-	chr13.trna2251-GluCTC	16	31	TCCCTGGTGGTCTAGTGGTTAGGATTCGGCGCTCTCACCGCCGCGGCCCGGGTTCGATTCCCGGTCAGGGAACCA	75	)))))))..))))........((((.))))).......(((((....))))).......((((((((((((.	TGGTTAGGATTCGGCG	i-tRF	16	ExactMatch	136	168	160	79	31	111	194	47	199	165	257	166	1391.32	2525.06	2209.61	983.186	188.618	683.872	784.428	239.426	892.509	1032.48	1677.92	820.803	-3.7431	0.0151823	0.0294857	2.32995	0.0434444	0.245845	-1.60651	0.149894	0.204844
AS-tDR-011670	-	-	chr13.trna2251-GluCTC	16	42	TCCCTGGTGGTCTAGTGGTTAGGATTCGGCGCTCTCACCGCCGCGGCCCGGGTTCGATTCCCGGTCAGGGAACCA	75	)))))))..))))........((((.))))).......(((((....))))).......((((((((((((.	TGGTTAGGATTCGGCGCTCTCACCGCT	i-tRF	27	27C>T	159	185	132	184	62	196	246	279	288	183	215	249	1626.62	2780.58	1822.93	2289.95	377.237	1207.56	994.687	1421.27	1291.67	1145.12	1403.71	1231.2	-2.12849	0.0163673	0.030965	1.26742	0.291679	0.596906	-1.67939	0.0169466	0.0515523
AS-tDR-000544	-	-	chr17.trna3727-GluCTC	1	28	TCCCTGGTGGTCTAGTGGTTAGGATTCGGCGCTCTCACCGCCGCGGCCCGGGTTCGATTCCCGGTCAGGGAACCA	75	)))))))..))))........((((.))))).......(((((....))))).......((((((((((((.	TCCCTGGTGGTCTAGTGGTTAGGATTCG	tRF-5	28	ExactMatch	216	66	74	64	84	108	130	105	98	83	57	60	2209.74	991.989	1021.94	796.505	511.095	665.389	525.648	534.887	439.527	519.37	372.145	296.676	-2.24192	0.0754398	0.111198	-1.37341	0.0427215	0.245845	-3.07907	0.0404094	0.0811962
AS-tDR-000060	-	-	chr17.trna3727-GluCTC	1	31	TCCCTGGTGGTCTAGTGGTTAGGATTCGGCGCTCTCACCGCCGCGGCCCGGGTTCGATTCCCGGTCAGGGAACCA	75	)))))))..))))........((((.))))).......(((((....))))).......((((((((((((.	TCCCTGGTGGTCTAGTGGTTAGGATTCGGCG	tRF-5	31	ExactMatch	108	64	79	75	249	232	310	359	406	191	169	238	1104.87	961.929	1090.99	933.405	1515.03	1429.35	1253.47	1828.81	1820.9	1195.18	1103.38	1176.81	1.47262	0.00922023	0.0201184	-1.1378	0.408887	0.672621	1.29426	0.131262	0.193949
AS-tDR-007247	-	-	chr17.trna3727-GluCTC	1	32	TCCCTGGTGGTCTAGTGGTTAGGATTCGGCGCTCTCACCGCCGCGGCCCGGGTTCGATTCCCGGTCAGGGAACCA	75	)))))))..))))........((((.))))).......(((((....))))).......((((((((((((.	TCCCTGTGGTCTAGTGGTTAGGATTCGGCGCT	tiRNA-5	32	6-G	320	272	269	264	1494	1399	1743	2199	1892	1364	1248	1757	3273.69	4088.2	3714.91	3285.58	9090.19	8619.26	7047.72	11202.1	8485.56	8535.19	8148.02	8687.65	2.50329	0.000852021	0.00530147	-1.0621	0.565419	0.845823	2.35692	6.45936e-07	0.000134748
AS-tDR-008177	-	-	chr17.trna3727-GluCTC	1	33	TCCCTGGTGGTCTAGTGGTTAGGATTCGGCGCTCTCACCGCCGCGGCCCGGGTTCGATTCCCGGTCAGGGAACCA	75	)))))))..))))........((((.))))).......(((((....))))).......((((((((((((.	TCCCTGGTGGTCTAGTGGTTAGGATTCGGCGCA	tiRNA-5	33	33T>A	120	82	103	84	452	448	553	712	569	351	362	457	1227.63	1232.47	1422.44	1045.41	2750.18	2760.13	2236.02	3627.05	2551.95	2196.37	2363.45	2259.68	2.30687	0.00166875	0.00838977	-1.21353	0.144923	0.410438	1.90096	5.30737e-05	0.00129394
AS-tDR-007322	-	-	chr17.trna3727-GluCTC	1	33	TCCCTGGTGGTCTAGTGGTTAGGATTCGGCGCTCTCACCGCCGCGGCCCGGGTTCGATTCCCGGTCAGGGAACCA	75	)))))))..))))........((((.))))).......(((((....))))).......((((((((((((.	TCCCTGGTGGTCTAGTGGTTAGGATTCGGCGCC	tiRNA-5	33	33T>C	73	71	69	61	305	309	376	465	443	261	279	360	746.811	1067.14	952.894	759.169	1855.76	1903.75	1520.33	2368.79	1986.84	1633.2	1821.55	1780.05	2.16788	0.00167178	0.00838977	-1.05909	0.592731	0.86926	2.04692	0.000129543	0.00256074
AS-tDR-001260	-	-	chr17.trna3727-GluCTC	1	33	TCCCTGGTGGTCTAGTGGTTAGGATTCGGCGCTCTCACCGCCGCGGCCCGGGTTCGATTCCCGGTCAGGGAACCA	75	)))))))..))))........((((.))))).......(((((....))))).......((((((((((((.	TCCCTGGTGGTCTAGTGGTTAGGATTCGGCGCT	tiRNA-5	33	ExactMatch	598	443	447	433	2559	2159	2795	3500	2946	1992	2079	2801	6117.71	6658.35	6173.1	5388.86	15570.1	13301.6	11301.4	17829.6	13212.7	12464.9	13573.5	13849.8	2.38299	0.00108768	0.0064677	-1.09231	0.428243	0.689905	2.18162	1.85303e-06	0.000147316
AS-tDR-001262	-	-	chr17.trna3727-GluCTC	1	35	TCCCTGGTGGTCTAGTGGTTAGGATTCGGCGCTCTCACCGCCGCGGCCCGGGTTCGATTCCCGGTCAGGGAACCA	75	)))))))..))))........((((.))))).......(((((....))))).......((((((((((((.	TCCCTGGTGGTCTAGTGGTTAGGATTCGGCGCTCT	tiRNA-5	35	ExactMatch	111	113	77	125	299	274	451	451	307	218	324	188	1135.56	1698.41	1063.37	1555.67	1819.25	1688.12	1823.59	2297.47	1376.89	1364.13	2115.35	929.584	1.39865	0.0381262	0.060912	-1.31822	0.151135	0.416503	1.06101	0.784595	0.798126
AS-tDR-000550	-	-	chr17.trna3727-GluCTC	1	39	TCCCTGGTGGTCTAGTGGTTAGGATTCGGCGCTCTCACCGCCGCGGCCCGGGTTCGATTCCCGGTCAGGGAACCA	75	)))))))..))))........((((.))))).......(((((....))))).......((((((((((((.	TCCCTGGTGGTCTAGTGGTTAGGATTCGGCGCTCTCACC	tRF-5	39	ExactMatch	238	248	243	241	167	260	687	324	296	261	186	213	2434.81	3727.47	3355.84	2999.34	1016.11	1601.86	2777.85	1650.51	1327.55	1633.2	1214.37	1053.2	-1.77601	0.024762	0.0430598	-1.34746	0.285808	0.595895	-2.3931	0.000922231	0.00818592
AS-tDR-009999	-	-	chr17.trna3727-GluCTC	1	39	TCCCTGGTGGTCTAGTGGTTAGGATTCGGCGCTCTCACCGCCGCGGCCCGGGTTCGATTCCCGGTCAGGGAACCA	75	)))))))..))))........((((.))))).......(((((....))))).......((((((((((((.	TCCCTGGTGGTCTAGTGGTTAGGATTCGGCGCTCTCACT	tRF-5	39	39C>T	369	340	293	305	187	336	777	389	357	306	222	232	3774.97	5110.25	4046.35	3795.85	1137.79	2070.1	3141.76	1981.63	1601.13	1914.79	1449.41	1147.15	-2.0073	0.00670834	0.016279	-1.36276	0.254938	0.568828	-2.73547	0.000289847	0.00369328
AS-tDR-002583	-	-	chr17.trna3727-GluCTC	16	31	TCCCTGGTGGTCTAGTGGTTAGGATTCGGCGCTCTCACCGCCGCGGCCCGGGTTCGATTCCCGGTCAGGGAACCA	75	)))))))..))))........((((.))))).......(((((....))))).......((((((((((((.	TGGTTAGGATTCGGCG	i-tRF	16	ExactMatch	136	168	160	79	31	111	194	47	199	165	257	166	1391.32	2525.06	2209.61	983.186	188.618	683.872	784.428	239.426	892.509	1032.48	1677.92	820.803	-3.7431	0.0151823	0.0294857	2.32995	0.0434444	0.245845	-1.60651	0.149894	0.204844
AS-tDR-011670	-	-	chr17.trna3727-GluCTC	16	42	TCCCTGGTGGTCTAGTGGTTAGGATTCGGCGCTCTCACCGCCGCGGCCCGGGTTCGATTCCCGGTCAGGGAACCA	75	)))))))..))))........((((.))))).......(((((....))))).......((((((((((((.	TGGTTAGGATTCGGCGCTCTCACCGCT	i-tRF	27	27C>T	159	185	132	184	62	196	246	279	288	183	215	249	1626.62	2780.58	1822.93	2289.95	377.237	1207.56	994.687	1421.27	1291.67	1145.12	1403.71	1231.2	-2.12849	0.0163673	0.030965	1.26742	0.291679	0.596906	-1.67939	0.0169466	0.0515523
AS-tDR-000544	-	-	chr2.trna7561-GluCTC	1	28	TCCCTGGTGGTCTAGTGGTTAGGATTCGGCGCTCTCACCGCCGCGGCCCGGGTTCGATTCCCGGTCAGGGAACCA	75	)))))))..))))........((((.))))).......(((((....))))).......((((((((((((.	TCCCTGGTGGTCTAGTGGTTAGGATTCG	tRF-5	28	ExactMatch	216	66	74	64	84	108	130	105	98	83	57	60	2209.74	991.989	1021.94	796.505	511.095	665.389	525.648	534.887	439.527	519.37	372.145	296.676	-2.24192	0.0754398	0.111198	-1.37341	0.0427215	0.245845	-3.07907	0.0404094	0.0811962
AS-tDR-000060	-	-	chr2.trna7561-GluCTC	1	31	TCCCTGGTGGTCTAGTGGTTAGGATTCGGCGCTCTCACCGCCGCGGCCCGGGTTCGATTCCCGGTCAGGGAACCA	75	)))))))..))))........((((.))))).......(((((....))))).......((((((((((((.	TCCCTGGTGGTCTAGTGGTTAGGATTCGGCG	tRF-5	31	ExactMatch	108	64	79	75	249	232	310	359	406	191	169	238	1104.87	961.929	1090.99	933.405	1515.03	1429.35	1253.47	1828.81	1820.9	1195.18	1103.38	1176.81	1.47262	0.00922023	0.0201184	-1.1378	0.408887	0.672621	1.29426	0.131262	0.193949
AS-tDR-007247	-	-	chr2.trna7561-GluCTC	1	32	TCCCTGGTGGTCTAGTGGTTAGGATTCGGCGCTCTCACCGCCGCGGCCCGGGTTCGATTCCCGGTCAGGGAACCA	75	)))))))..))))........((((.))))).......(((((....))))).......((((((((((((.	TCCCTGTGGTCTAGTGGTTAGGATTCGGCGCT	tiRNA-5	32	6-G	320	272	269	264	1494	1399	1743	2199	1892	1364	1248	1757	3273.69	4088.2	3714.91	3285.58	9090.19	8619.26	7047.72	11202.1	8485.56	8535.19	8148.02	8687.65	2.50329	0.000852021	0.00530147	-1.0621	0.565419	0.845823	2.35692	6.45936e-07	0.000134748
AS-tDR-008177	-	-	chr2.trna7561-GluCTC	1	33	TCCCTGGTGGTCTAGTGGTTAGGATTCGGCGCTCTCACCGCCGCGGCCCGGGTTCGATTCCCGGTCAGGGAACCA	75	)))))))..))))........((((.))))).......(((((....))))).......((((((((((((.	TCCCTGGTGGTCTAGTGGTTAGGATTCGGCGCA	tiRNA-5	33	33T>A	120	82	103	84	452	448	553	712	569	351	362	457	1227.63	1232.47	1422.44	1045.41	2750.18	2760.13	2236.02	3627.05	2551.95	2196.37	2363.45	2259.68	2.30687	0.00166875	0.00838977	-1.21353	0.144923	0.410438	1.90096	5.30737e-05	0.00129394
AS-tDR-007322	-	-	chr2.trna7561-GluCTC	1	33	TCCCTGGTGGTCTAGTGGTTAGGATTCGGCGCTCTCACCGCCGCGGCCCGGGTTCGATTCCCGGTCAGGGAACCA	75	)))))))..))))........((((.))))).......(((((....))))).......((((((((((((.	TCCCTGGTGGTCTAGTGGTTAGGATTCGGCGCC	tiRNA-5	33	33T>C	73	71	69	61	305	309	376	465	443	261	279	360	746.811	1067.14	952.894	759.169	1855.76	1903.75	1520.33	2368.79	1986.84	1633.2	1821.55	1780.05	2.16788	0.00167178	0.00838977	-1.05909	0.592731	0.86926	2.04692	0.000129543	0.00256074
AS-tDR-001260	-	-	chr2.trna7561-GluCTC	1	33	TCCCTGGTGGTCTAGTGGTTAGGATTCGGCGCTCTCACCGCCGCGGCCCGGGTTCGATTCCCGGTCAGGGAACCA	75	)))))))..))))........((((.))))).......(((((....))))).......((((((((((((.	TCCCTGGTGGTCTAGTGGTTAGGATTCGGCGCT	tiRNA-5	33	ExactMatch	598	443	447	433	2559	2159	2795	3500	2946	1992	2079	2801	6117.71	6658.35	6173.1	5388.86	15570.1	13301.6	11301.4	17829.6	13212.7	12464.9	13573.5	13849.8	2.38299	0.00108768	0.0064677	-1.09231	0.428243	0.689905	2.18162	1.85303e-06	0.000147316
AS-tDR-001262	-	-	chr2.trna7561-GluCTC	1	35	TCCCTGGTGGTCTAGTGGTTAGGATTCGGCGCTCTCACCGCCGCGGCCCGGGTTCGATTCCCGGTCAGGGAACCA	75	)))))))..))))........((((.))))).......(((((....))))).......((((((((((((.	TCCCTGGTGGTCTAGTGGTTAGGATTCGGCGCTCT	tiRNA-5	35	ExactMatch	111	113	77	125	299	274	451	451	307	218	324	188	1135.56	1698.41	1063.37	1555.67	1819.25	1688.12	1823.59	2297.47	1376.89	1364.13	2115.35	929.584	1.39865	0.0381262	0.060912	-1.31822	0.151135	0.416503	1.06101	0.784595	0.798126
AS-tDR-000550	-	-	chr2.trna7561-GluCTC	1	39	TCCCTGGTGGTCTAGTGGTTAGGATTCGGCGCTCTCACCGCCGCGGCCCGGGTTCGATTCCCGGTCAGGGAACCA	75	)))))))..))))........((((.))))).......(((((....))))).......((((((((((((.	TCCCTGGTGGTCTAGTGGTTAGGATTCGGCGCTCTCACC	tRF-5	39	ExactMatch	238	248	243	241	167	260	687	324	296	261	186	213	2434.81	3727.47	3355.84	2999.34	1016.11	1601.86	2777.85	1650.51	1327.55	1633.2	1214.37	1053.2	-1.77601	0.024762	0.0430598	-1.34746	0.285808	0.595895	-2.3931	0.000922231	0.00818592
AS-tDR-009999	-	-	chr2.trna7561-GluCTC	1	39	TCCCTGGTGGTCTAGTGGTTAGGATTCGGCGCTCTCACCGCCGCGGCCCGGGTTCGATTCCCGGTCAGGGAACCA	75	)))))))..))))........((((.))))).......(((((....))))).......((((((((((((.	TCCCTGGTGGTCTAGTGGTTAGGATTCGGCGCTCTCACT	tRF-5	39	39C>T	369	340	293	305	187	336	777	389	357	306	222	232	3774.97	5110.25	4046.35	3795.85	1137.79	2070.1	3141.76	1981.63	1601.13	1914.79	1449.41	1147.15	-2.0073	0.00670834	0.016279	-1.36276	0.254938	0.568828	-2.73547	0.000289847	0.00369328
AS-tDR-002583	-	-	chr2.trna7561-GluCTC	16	31	TCCCTGGTGGTCTAGTGGTTAGGATTCGGCGCTCTCACCGCCGCGGCCCGGGTTCGATTCCCGGTCAGGGAACCA	75	)))))))..))))........((((.))))).......(((((....))))).......((((((((((((.	TGGTTAGGATTCGGCG	i-tRF	16	ExactMatch	136	168	160	79	31	111	194	47	199	165	257	166	1391.32	2525.06	2209.61	983.186	188.618	683.872	784.428	239.426	892.509	1032.48	1677.92	820.803	-3.7431	0.0151823	0.0294857	2.32995	0.0434444	0.245845	-1.60651	0.149894	0.204844
AS-tDR-011670	-	-	chr2.trna7561-GluCTC	16	42	TCCCTGGTGGTCTAGTGGTTAGGATTCGGCGCTCTCACCGCCGCGGCCCGGGTTCGATTCCCGGTCAGGGAACCA	75	)))))))..))))........((((.))))).......(((((....))))).......((((((((((((.	TGGTTAGGATTCGGCGCTCTCACCGCT	i-tRF	27	27C>T	159	185	132	184	62	196	246	279	288	183	215	249	1626.62	2780.58	1822.93	2289.95	377.237	1207.56	994.687	1421.27	1291.67	1145.12	1403.71	1231.2	-2.12849	0.0163673	0.030965	1.26742	0.291679	0.596906	-1.67939	0.0169466	0.0515523
AS-tDR-000544	-	-	chr2.trna7565-GluCTC	1	28	TCCCTGGTGGTCTAGTGGTTAGGATTCGGCGCTCTCACCGCCGCGGCCCGGGTTCGATTCCCGGTCAGGGAACCA	75	)))))))..))))........((((.))))).......(((((....))))).......((((((((((((.	TCCCTGGTGGTCTAGTGGTTAGGATTCG	tRF-5	28	ExactMatch	216	66	74	64	84	108	130	105	98	83	57	60	2209.74	991.989	1021.94	796.505	511.095	665.389	525.648	534.887	439.527	519.37	372.145	296.676	-2.24192	0.0754398	0.111198	-1.37341	0.0427215	0.245845	-3.07907	0.0404094	0.0811962
AS-tDR-000060	-	-	chr2.trna7565-GluCTC	1	31	TCCCTGGTGGTCTAGTGGTTAGGATTCGGCGCTCTCACCGCCGCGGCCCGGGTTCGATTCCCGGTCAGGGAACCA	75	)))))))..))))........((((.))))).......(((((....))))).......((((((((((((.	TCCCTGGTGGTCTAGTGGTTAGGATTCGGCG	tRF-5	31	ExactMatch	108	64	79	75	249	232	310	359	406	191	169	238	1104.87	961.929	1090.99	933.405	1515.03	1429.35	1253.47	1828.81	1820.9	1195.18	1103.38	1176.81	1.47262	0.00922023	0.0201184	-1.1378	0.408887	0.672621	1.29426	0.131262	0.193949
AS-tDR-007247	-	-	chr2.trna7565-GluCTC	1	32	TCCCTGGTGGTCTAGTGGTTAGGATTCGGCGCTCTCACCGCCGCGGCCCGGGTTCGATTCCCGGTCAGGGAACCA	75	)))))))..))))........((((.))))).......(((((....))))).......((((((((((((.	TCCCTGTGGTCTAGTGGTTAGGATTCGGCGCT	tiRNA-5	32	6-G	320	272	269	264	1494	1399	1743	2199	1892	1364	1248	1757	3273.69	4088.2	3714.91	3285.58	9090.19	8619.26	7047.72	11202.1	8485.56	8535.19	8148.02	8687.65	2.50329	0.000852021	0.00530147	-1.0621	0.565419	0.845823	2.35692	6.45936e-07	0.000134748
AS-tDR-008177	-	-	chr2.trna7565-GluCTC	1	33	TCCCTGGTGGTCTAGTGGTTAGGATTCGGCGCTCTCACCGCCGCGGCCCGGGTTCGATTCCCGGTCAGGGAACCA	75	)))))))..))))........((((.))))).......(((((....))))).......((((((((((((.	TCCCTGGTGGTCTAGTGGTTAGGATTCGGCGCA	tiRNA-5	33	33T>A	120	82	103	84	452	448	553	712	569	351	362	457	1227.63	1232.47	1422.44	1045.41	2750.18	2760.13	2236.02	3627.05	2551.95	2196.37	2363.45	2259.68	2.30687	0.00166875	0.00838977	-1.21353	0.144923	0.410438	1.90096	5.30737e-05	0.00129394
AS-tDR-007322	-	-	chr2.trna7565-GluCTC	1	33	TCCCTGGTGGTCTAGTGGTTAGGATTCGGCGCTCTCACCGCCGCGGCCCGGGTTCGATTCCCGGTCAGGGAACCA	75	)))))))..))))........((((.))))).......(((((....))))).......((((((((((((.	TCCCTGGTGGTCTAGTGGTTAGGATTCGGCGCC	tiRNA-5	33	33T>C	73	71	69	61	305	309	376	465	443	261	279	360	746.811	1067.14	952.894	759.169	1855.76	1903.75	1520.33	2368.79	1986.84	1633.2	1821.55	1780.05	2.16788	0.00167178	0.00838977	-1.05909	0.592731	0.86926	2.04692	0.000129543	0.00256074
AS-tDR-001260	-	-	chr2.trna7565-GluCTC	1	33	TCCCTGGTGGTCTAGTGGTTAGGATTCGGCGCTCTCACCGCCGCGGCCCGGGTTCGATTCCCGGTCAGGGAACCA	75	)))))))..))))........((((.))))).......(((((....))))).......((((((((((((.	TCCCTGGTGGTCTAGTGGTTAGGATTCGGCGCT	tiRNA-5	33	ExactMatch	598	443	447	433	2559	2159	2795	3500	2946	1992	2079	2801	6117.71	6658.35	6173.1	5388.86	15570.1	13301.6	11301.4	17829.6	13212.7	12464.9	13573.5	13849.8	2.38299	0.00108768	0.0064677	-1.09231	0.428243	0.689905	2.18162	1.85303e-06	0.000147316
AS-tDR-001262	-	-	chr2.trna7565-GluCTC	1	35	TCCCTGGTGGTCTAGTGGTTAGGATTCGGCGCTCTCACCGCCGCGGCCCGGGTTCGATTCCCGGTCAGGGAACCA	75	)))))))..))))........((((.))))).......(((((....))))).......((((((((((((.	TCCCTGGTGGTCTAGTGGTTAGGATTCGGCGCTCT	tiRNA-5	35	ExactMatch	111	113	77	125	299	274	451	451	307	218	324	188	1135.56	1698.41	1063.37	1555.67	1819.25	1688.12	1823.59	2297.47	1376.89	1364.13	2115.35	929.584	1.39865	0.0381262	0.060912	-1.31822	0.151135	0.416503	1.06101	0.784595	0.798126
AS-tDR-000550	-	-	chr2.trna7565-GluCTC	1	39	TCCCTGGTGGTCTAGTGGTTAGGATTCGGCGCTCTCACCGCCGCGGCCCGGGTTCGATTCCCGGTCAGGGAACCA	75	)))))))..))))........((((.))))).......(((((....))))).......((((((((((((.	TCCCTGGTGGTCTAGTGGTTAGGATTCGGCGCTCTCACC	tRF-5	39	ExactMatch	238	248	243	241	167	260	687	324	296	261	186	213	2434.81	3727.47	3355.84	2999.34	1016.11	1601.86	2777.85	1650.51	1327.55	1633.2	1214.37	1053.2	-1.77601	0.024762	0.0430598	-1.34746	0.285808	0.595895	-2.3931	0.000922231	0.00818592
AS-tDR-009999	-	-	chr2.trna7565-GluCTC	1	39	TCCCTGGTGGTCTAGTGGTTAGGATTCGGCGCTCTCACCGCCGCGGCCCGGGTTCGATTCCCGGTCAGGGAACCA	75	)))))))..))))........((((.))))).......(((((....))))).......((((((((((((.	TCCCTGGTGGTCTAGTGGTTAGGATTCGGCGCTCTCACT	tRF-5	39	39C>T	369	340	293	305	187	336	777	389	357	306	222	232	3774.97	5110.25	4046.35	3795.85	1137.79	2070.1	3141.76	1981.63	1601.13	1914.79	1449.41	1147.15	-2.0073	0.00670834	0.016279	-1.36276	0.254938	0.568828	-2.73547	0.000289847	0.00369328
AS-tDR-002583	-	-	chr2.trna7565-GluCTC	16	31	TCCCTGGTGGTCTAGTGGTTAGGATTCGGCGCTCTCACCGCCGCGGCCCGGGTTCGATTCCCGGTCAGGGAACCA	75	)))))))..))))........((((.))))).......(((((....))))).......((((((((((((.	TGGTTAGGATTCGGCG	i-tRF	16	ExactMatch	136	168	160	79	31	111	194	47	199	165	257	166	1391.32	2525.06	2209.61	983.186	188.618	683.872	784.428	239.426	892.509	1032.48	1677.92	820.803	-3.7431	0.0151823	0.0294857	2.32995	0.0434444	0.245845	-1.60651	0.149894	0.204844
AS-tDR-011670	-	-	chr2.trna7565-GluCTC	16	42	TCCCTGGTGGTCTAGTGGTTAGGATTCGGCGCTCTCACCGCCGCGGCCCGGGTTCGATTCCCGGTCAGGGAACCA	75	)))))))..))))........((((.))))).......(((((....))))).......((((((((((((.	TGGTTAGGATTCGGCGCTCTCACCGCT	i-tRF	27	27C>T	159	185	132	184	62	196	246	279	288	183	215	249	1626.62	2780.58	1822.93	2289.95	377.237	1207.56	994.687	1421.27	1291.67	1145.12	1403.71	1231.2	-2.12849	0.0163673	0.030965	1.26742	0.291679	0.596906	-1.67939	0.0169466	0.0515523
AS-tDR-000544	-	-	pre-chr1.trna17865-GluCTC	41	68	TAAATGAACCAAATAAAATAACAGAAGCCTCCCAGCAAGCTCCCTGGTGGTCTAGTGGTTAGGATTCGGCGCTCTCACCGCCGCGGCCCGGGTTCGATTCCCGGTCAGGGAAGTACTGTTTTTCAAACGATTTCTTTCACTATGTAAGTGAA	152	.....(((...........(((((..((.((((........((.(((((((..((((.(........).))))...))))))).)).(((((.......)))))...)))).)).)))))...........)))..(((((.....))))).	TCCCTGGTGGTCTAGTGGTTAGGATTCG	Other	28	ExactMatch	216	66	74	64	84	108	130	105	98	83	57	60	2209.74	991.989	1021.94	796.505	511.095	665.389	525.648	534.887	439.527	519.37	372.145	296.676	-2.24192	0.0754398	0.111198	-1.37341	0.0427215	0.245845	-3.07907	0.0404094	0.0811962
AS-tDR-000060	-	-	pre-chr1.trna17865-GluCTC	41	71	TAAATGAACCAAATAAAATAACAGAAGCCTCCCAGCAAGCTCCCTGGTGGTCTAGTGGTTAGGATTCGGCGCTCTCACCGCCGCGGCCCGGGTTCGATTCCCGGTCAGGGAAGTACTGTTTTTCAAACGATTTCTTTCACTATGTAAGTGAA	152	.....(((...........(((((..((.((((........((.(((((((..((((.(........).))))...))))))).)).(((((.......)))))...)))).)).)))))...........)))..(((((.....))))).	TCCCTGGTGGTCTAGTGGTTAGGATTCGGCG	Other	31	ExactMatch	108	64	79	75	249	232	310	359	406	191	169	238	1104.87	961.929	1090.99	933.405	1515.03	1429.35	1253.47	1828.81	1820.9	1195.18	1103.38	1176.81	1.47262	0.00922023	0.0201184	-1.1378	0.408887	0.672621	1.29426	0.131262	0.193949
AS-tDR-007247	-	-	pre-chr1.trna17865-GluCTC	41	72	TAAATGAACCAAATAAAATAACAGAAGCCTCCCAGCAAGCTCCCTGGTGGTCTAGTGGTTAGGATTCGGCGCTCTCACCGCCGCGGCCCGGGTTCGATTCCCGGTCAGGGAAGTACTGTTTTTCAAACGATTTCTTTCACTATGTAAGTGAA	152	.....(((...........(((((..((.((((........((.(((((((..((((.(........).))))...))))))).)).(((((.......)))))...)))).)).)))))...........)))..(((((.....))))).	TCCCTGTGGTCTAGTGGTTAGGATTCGGCGCT	Other	32	6-G	320	272	269	264	1494	1399	1743	2199	1892	1364	1248	1757	3273.69	4088.2	3714.91	3285.58	9090.19	8619.26	7047.72	11202.1	8485.56	8535.19	8148.02	8687.65	2.50329	0.000852021	0.00530147	-1.0621	0.565419	0.845823	2.35692	6.45936e-07	0.000134748
AS-tDR-008177	-	-	pre-chr1.trna17865-GluCTC	41	73	TAAATGAACCAAATAAAATAACAGAAGCCTCCCAGCAAGCTCCCTGGTGGTCTAGTGGTTAGGATTCGGCGCTCTCACCGCCGCGGCCCGGGTTCGATTCCCGGTCAGGGAAGTACTGTTTTTCAAACGATTTCTTTCACTATGTAAGTGAA	152	.....(((...........(((((..((.((((........((.(((((((..((((.(........).))))...))))))).)).(((((.......)))))...)))).)).)))))...........)))..(((((.....))))).	TCCCTGGTGGTCTAGTGGTTAGGATTCGGCGCA	Other	33	33T>A	120	82	103	84	452	448	553	712	569	351	362	457	1227.63	1232.47	1422.44	1045.41	2750.18	2760.13	2236.02	3627.05	2551.95	2196.37	2363.45	2259.68	2.30687	0.00166875	0.00838977	-1.21353	0.144923	0.410438	1.90096	5.30737e-05	0.00129394
AS-tDR-007322	-	-	pre-chr1.trna17865-GluCTC	41	73	TAAATGAACCAAATAAAATAACAGAAGCCTCCCAGCAAGCTCCCTGGTGGTCTAGTGGTTAGGATTCGGCGCTCTCACCGCCGCGGCCCGGGTTCGATTCCCGGTCAGGGAAGTACTGTTTTTCAAACGATTTCTTTCACTATGTAAGTGAA	152	.....(((...........(((((..((.((((........((.(((((((..((((.(........).))))...))))))).)).(((((.......)))))...)))).)).)))))...........)))..(((((.....))))).	TCCCTGGTGGTCTAGTGGTTAGGATTCGGCGCC	Other	33	33T>C	73	71	69	61	305	309	376	465	443	261	279	360	746.811	1067.14	952.894	759.169	1855.76	1903.75	1520.33	2368.79	1986.84	1633.2	1821.55	1780.05	2.16788	0.00167178	0.00838977	-1.05909	0.592731	0.86926	2.04692	0.000129543	0.00256074
AS-tDR-001260	-	-	pre-chr1.trna17865-GluCTC	41	73	TAAATGAACCAAATAAAATAACAGAAGCCTCCCAGCAAGCTCCCTGGTGGTCTAGTGGTTAGGATTCGGCGCTCTCACCGCCGCGGCCCGGGTTCGATTCCCGGTCAGGGAAGTACTGTTTTTCAAACGATTTCTTTCACTATGTAAGTGAA	152	.....(((...........(((((..((.((((........((.(((((((..((((.(........).))))...))))))).)).(((((.......)))))...)))).)).)))))...........)))..(((((.....))))).	TCCCTGGTGGTCTAGTGGTTAGGATTCGGCGCT	Other	33	ExactMatch	598	443	447	433	2559	2159	2795	3500	2946	1992	2079	2801	6117.71	6658.35	6173.1	5388.86	15570.1	13301.6	11301.4	17829.6	13212.7	12464.9	13573.5	13849.8	2.38299	0.00108768	0.0064677	-1.09231	0.428243	0.689905	2.18162	1.85303e-06	0.000147316
AS-tDR-001262	-	-	pre-chr1.trna17865-GluCTC	41	75	TAAATGAACCAAATAAAATAACAGAAGCCTCCCAGCAAGCTCCCTGGTGGTCTAGTGGTTAGGATTCGGCGCTCTCACCGCCGCGGCCCGGGTTCGATTCCCGGTCAGGGAAGTACTGTTTTTCAAACGATTTCTTTCACTATGTAAGTGAA	152	.....(((...........(((((..((.((((........((.(((((((..((((.(........).))))...))))))).)).(((((.......)))))...)))).)).)))))...........)))..(((((.....))))).	TCCCTGGTGGTCTAGTGGTTAGGATTCGGCGCTCT	Other	35	ExactMatch	111	113	77	125	299	274	451	451	307	218	324	188	1135.56	1698.41	1063.37	1555.67	1819.25	1688.12	1823.59	2297.47	1376.89	1364.13	2115.35	929.584	1.39865	0.0381262	0.060912	-1.31822	0.151135	0.416503	1.06101	0.784595	0.798126
AS-tDR-000550	-	-	pre-chr1.trna17865-GluCTC	41	79	TAAATGAACCAAATAAAATAACAGAAGCCTCCCAGCAAGCTCCCTGGTGGTCTAGTGGTTAGGATTCGGCGCTCTCACCGCCGCGGCCCGGGTTCGATTCCCGGTCAGGGAAGTACTGTTTTTCAAACGATTTCTTTCACTATGTAAGTGAA	152	.....(((...........(((((..((.((((........((.(((((((..((((.(........).))))...))))))).)).(((((.......)))))...)))).)).)))))...........)))..(((((.....))))).	TCCCTGGTGGTCTAGTGGTTAGGATTCGGCGCTCTCACC	Other	39	ExactMatch	238	248	243	241	167	260	687	324	296	261	186	213	2434.81	3727.47	3355.84	2999.34	1016.11	1601.86	2777.85	1650.51	1327.55	1633.2	1214.37	1053.2	-1.77601	0.024762	0.0430598	-1.34746	0.285808	0.595895	-2.3931	0.000922231	0.00818592
AS-tDR-009999	-	-	pre-chr1.trna17865-GluCTC	41	79	TAAATGAACCAAATAAAATAACAGAAGCCTCCCAGCAAGCTCCCTGGTGGTCTAGTGGTTAGGATTCGGCGCTCTCACCGCCGCGGCCCGGGTTCGATTCCCGGTCAGGGAAGTACTGTTTTTCAAACGATTTCTTTCACTATGTAAGTGAA	152	.....(((...........(((((..((.((((........((.(((((((..((((.(........).))))...))))))).)).(((((.......)))))...)))).)).)))))...........)))..(((((.....))))).	TCCCTGGTGGTCTAGTGGTTAGGATTCGGCGCTCTCACT	Other	39	39C>T	369	340	293	305	187	336	777	389	357	306	222	232	3774.97	5110.25	4046.35	3795.85	1137.79	2070.1	3141.76	1981.63	1601.13	1914.79	1449.41	1147.15	-2.0073	0.00670834	0.016279	-1.36276	0.254938	0.568828	-2.73547	0.000289847	0.00369328
AS-tDR-002583	-	-	pre-chr1.trna17865-GluCTC	56	71	TAAATGAACCAAATAAAATAACAGAAGCCTCCCAGCAAGCTCCCTGGTGGTCTAGTGGTTAGGATTCGGCGCTCTCACCGCCGCGGCCCGGGTTCGATTCCCGGTCAGGGAAGTACTGTTTTTCAAACGATTTCTTTCACTATGTAAGTGAA	152	.....(((...........(((((..((.((((........((.(((((((..((((.(........).))))...))))))).)).(((((.......)))))...)))).)).)))))...........)))..(((((.....))))).	TGGTTAGGATTCGGCG	Other	16	ExactMatch	136	168	160	79	31	111	194	47	199	165	257	166	1391.32	2525.06	2209.61	983.186	188.618	683.872	784.428	239.426	892.509	1032.48	1677.92	820.803	-3.7431	0.0151823	0.0294857	2.32995	0.0434444	0.245845	-1.60651	0.149894	0.204844
AS-tDR-011670	-	-	pre-chr1.trna17865-GluCTC	56	82	TAAATGAACCAAATAAAATAACAGAAGCCTCCCAGCAAGCTCCCTGGTGGTCTAGTGGTTAGGATTCGGCGCTCTCACCGCCGCGGCCCGGGTTCGATTCCCGGTCAGGGAAGTACTGTTTTTCAAACGATTTCTTTCACTATGTAAGTGAA	152	.....(((...........(((((..((.((((........((.(((((((..((((.(........).))))...))))))).)).(((((.......)))))...)))).)).)))))...........)))..(((((.....))))).	TGGTTAGGATTCGGCGCTCTCACCGCT	Other	27	27C>T	159	185	132	184	62	196	246	279	288	183	215	249	1626.62	2780.58	1822.93	2289.95	377.237	1207.56	994.687	1421.27	1291.67	1145.12	1403.71	1231.2	-2.12849	0.0163673	0.030965	1.26742	0.291679	0.596906	-1.67939	0.0169466	0.0515523
AS-tDR-000544	-	-	pre-chr10.trna11803-GluCTC	41	68	TCACCTAGTCTAGTGCCGCGAGAGCCCAGTTACTATCTCTTCCCTGGTGGTCTAGTGGTTAGGATTCGGCGCTCTCACCGCCGCGGCCCGGGTTCGATTCCCGGTCAGGGAAGTACACTTTTTCTCCTGATTTTCTAAATTTCATTACTGAA	152	.....((((.....(((((((((((((.(.....((((...((((((....)))).))...)))).))).))))))......)))))(((((.......)))))(((((((((.......)))).)))))................))))..	TCCCTGGTGGTCTAGTGGTTAGGATTCG	Other	28	ExactMatch	216	66	74	64	84	108	130	105	98	83	57	60	2209.74	991.989	1021.94	796.505	511.095	665.389	525.648	534.887	439.527	519.37	372.145	296.676	-2.24192	0.0754398	0.111198	-1.37341	0.0427215	0.245845	-3.07907	0.0404094	0.0811962
AS-tDR-000060	-	-	pre-chr10.trna11803-GluCTC	41	71	TCACCTAGTCTAGTGCCGCGAGAGCCCAGTTACTATCTCTTCCCTGGTGGTCTAGTGGTTAGGATTCGGCGCTCTCACCGCCGCGGCCCGGGTTCGATTCCCGGTCAGGGAAGTACACTTTTTCTCCTGATTTTCTAAATTTCATTACTGAA	152	.....((((.....(((((((((((((.(.....((((...((((((....)))).))...)))).))).))))))......)))))(((((.......)))))(((((((((.......)))).)))))................))))..	TCCCTGGTGGTCTAGTGGTTAGGATTCGGCG	Other	31	ExactMatch	108	64	79	75	249	232	310	359	406	191	169	238	1104.87	961.929	1090.99	933.405	1515.03	1429.35	1253.47	1828.81	1820.9	1195.18	1103.38	1176.81	1.47262	0.00922023	0.0201184	-1.1378	0.408887	0.672621	1.29426	0.131262	0.193949
AS-tDR-007247	-	-	pre-chr10.trna11803-GluCTC	41	72	TCACCTAGTCTAGTGCCGCGAGAGCCCAGTTACTATCTCTTCCCTGGTGGTCTAGTGGTTAGGATTCGGCGCTCTCACCGCCGCGGCCCGGGTTCGATTCCCGGTCAGGGAAGTACACTTTTTCTCCTGATTTTCTAAATTTCATTACTGAA	152	.....((((.....(((((((((((((.(.....((((...((((((....)))).))...)))).))).))))))......)))))(((((.......)))))(((((((((.......)))).)))))................))))..	TCCCTGTGGTCTAGTGGTTAGGATTCGGCGCT	Other	32	6-G	320	272	269	264	1494	1399	1743	2199	1892	1364	1248	1757	3273.69	4088.2	3714.91	3285.58	9090.19	8619.26	7047.72	11202.1	8485.56	8535.19	8148.02	8687.65	2.50329	0.000852021	0.00530147	-1.0621	0.565419	0.845823	2.35692	6.45936e-07	0.000134748
AS-tDR-008177	-	-	pre-chr10.trna11803-GluCTC	41	73	TCACCTAGTCTAGTGCCGCGAGAGCCCAGTTACTATCTCTTCCCTGGTGGTCTAGTGGTTAGGATTCGGCGCTCTCACCGCCGCGGCCCGGGTTCGATTCCCGGTCAGGGAAGTACACTTTTTCTCCTGATTTTCTAAATTTCATTACTGAA	152	.....((((.....(((((((((((((.(.....((((...((((((....)))).))...)))).))).))))))......)))))(((((.......)))))(((((((((.......)))).)))))................))))..	TCCCTGGTGGTCTAGTGGTTAGGATTCGGCGCA	Other	33	33T>A	120	82	103	84	452	448	553	712	569	351	362	457	1227.63	1232.47	1422.44	1045.41	2750.18	2760.13	2236.02	3627.05	2551.95	2196.37	2363.45	2259.68	2.30687	0.00166875	0.00838977	-1.21353	0.144923	0.410438	1.90096	5.30737e-05	0.00129394
AS-tDR-007322	-	-	pre-chr10.trna11803-GluCTC	41	73	TCACCTAGTCTAGTGCCGCGAGAGCCCAGTTACTATCTCTTCCCTGGTGGTCTAGTGGTTAGGATTCGGCGCTCTCACCGCCGCGGCCCGGGTTCGATTCCCGGTCAGGGAAGTACACTTTTTCTCCTGATTTTCTAAATTTCATTACTGAA	152	.....((((.....(((((((((((((.(.....((((...((((((....)))).))...)))).))).))))))......)))))(((((.......)))))(((((((((.......)))).)))))................))))..	TCCCTGGTGGTCTAGTGGTTAGGATTCGGCGCC	Other	33	33T>C	73	71	69	61	305	309	376	465	443	261	279	360	746.811	1067.14	952.894	759.169	1855.76	1903.75	1520.33	2368.79	1986.84	1633.2	1821.55	1780.05	2.16788	0.00167178	0.00838977	-1.05909	0.592731	0.86926	2.04692	0.000129543	0.00256074
AS-tDR-001260	-	-	pre-chr10.trna11803-GluCTC	41	73	TCACCTAGTCTAGTGCCGCGAGAGCCCAGTTACTATCTCTTCCCTGGTGGTCTAGTGGTTAGGATTCGGCGCTCTCACCGCCGCGGCCCGGGTTCGATTCCCGGTCAGGGAAGTACACTTTTTCTCCTGATTTTCTAAATTTCATTACTGAA	152	.....((((.....(((((((((((((.(.....((((...((((((....)))).))...)))).))).))))))......)))))(((((.......)))))(((((((((.......)))).)))))................))))..	TCCCTGGTGGTCTAGTGGTTAGGATTCGGCGCT	Other	33	ExactMatch	598	443	447	433	2559	2159	2795	3500	2946	1992	2079	2801	6117.71	6658.35	6173.1	5388.86	15570.1	13301.6	11301.4	17829.6	13212.7	12464.9	13573.5	13849.8	2.38299	0.00108768	0.0064677	-1.09231	0.428243	0.689905	2.18162	1.85303e-06	0.000147316
AS-tDR-001262	-	-	pre-chr10.trna11803-GluCTC	41	75	TCACCTAGTCTAGTGCCGCGAGAGCCCAGTTACTATCTCTTCCCTGGTGGTCTAGTGGTTAGGATTCGGCGCTCTCACCGCCGCGGCCCGGGTTCGATTCCCGGTCAGGGAAGTACACTTTTTCTCCTGATTTTCTAAATTTCATTACTGAA	152	.....((((.....(((((((((((((.(.....((((...((((((....)))).))...)))).))).))))))......)))))(((((.......)))))(((((((((.......)))).)))))................))))..	TCCCTGGTGGTCTAGTGGTTAGGATTCGGCGCTCT	Other	35	ExactMatch	111	113	77	125	299	274	451	451	307	218	324	188	1135.56	1698.41	1063.37	1555.67	1819.25	1688.12	1823.59	2297.47	1376.89	1364.13	2115.35	929.584	1.39865	0.0381262	0.060912	-1.31822	0.151135	0.416503	1.06101	0.784595	0.798126
AS-tDR-000550	-	-	pre-chr10.trna11803-GluCTC	41	79	TCACCTAGTCTAGTGCCGCGAGAGCCCAGTTACTATCTCTTCCCTGGTGGTCTAGTGGTTAGGATTCGGCGCTCTCACCGCCGCGGCCCGGGTTCGATTCCCGGTCAGGGAAGTACACTTTTTCTCCTGATTTTCTAAATTTCATTACTGAA	152	.....((((.....(((((((((((((.(.....((((...((((((....)))).))...)))).))).))))))......)))))(((((.......)))))(((((((((.......)))).)))))................))))..	TCCCTGGTGGTCTAGTGGTTAGGATTCGGCGCTCTCACC	Other	39	ExactMatch	238	248	243	241	167	260	687	324	296	261	186	213	2434.81	3727.47	3355.84	2999.34	1016.11	1601.86	2777.85	1650.51	1327.55	1633.2	1214.37	1053.2	-1.77601	0.024762	0.0430598	-1.34746	0.285808	0.595895	-2.3931	0.000922231	0.00818592
AS-tDR-009999	-	-	pre-chr10.trna11803-GluCTC	41	79	TCACCTAGTCTAGTGCCGCGAGAGCCCAGTTACTATCTCTTCCCTGGTGGTCTAGTGGTTAGGATTCGGCGCTCTCACCGCCGCGGCCCGGGTTCGATTCCCGGTCAGGGAAGTACACTTTTTCTCCTGATTTTCTAAATTTCATTACTGAA	152	.....((((.....(((((((((((((.(.....((((...((((((....)))).))...)))).))).))))))......)))))(((((.......)))))(((((((((.......)))).)))))................))))..	TCCCTGGTGGTCTAGTGGTTAGGATTCGGCGCTCTCACT	Other	39	39C>T	369	340	293	305	187	336	777	389	357	306	222	232	3774.97	5110.25	4046.35	3795.85	1137.79	2070.1	3141.76	1981.63	1601.13	1914.79	1449.41	1147.15	-2.0073	0.00670834	0.016279	-1.36276	0.254938	0.568828	-2.73547	0.000289847	0.00369328
AS-tDR-002583	-	-	pre-chr10.trna11803-GluCTC	56	71	TCACCTAGTCTAGTGCCGCGAGAGCCCAGTTACTATCTCTTCCCTGGTGGTCTAGTGGTTAGGATTCGGCGCTCTCACCGCCGCGGCCCGGGTTCGATTCCCGGTCAGGGAAGTACACTTTTTCTCCTGATTTTCTAAATTTCATTACTGAA	152	.....((((.....(((((((((((((.(.....((((...((((((....)))).))...)))).))).))))))......)))))(((((.......)))))(((((((((.......)))).)))))................))))..	TGGTTAGGATTCGGCG	Other	16	ExactMatch	136	168	160	79	31	111	194	47	199	165	257	166	1391.32	2525.06	2209.61	983.186	188.618	683.872	784.428	239.426	892.509	1032.48	1677.92	820.803	-3.7431	0.0151823	0.0294857	2.32995	0.0434444	0.245845	-1.60651	0.149894	0.204844
AS-tDR-011670	-	-	pre-chr10.trna11803-GluCTC	56	82	TCACCTAGTCTAGTGCCGCGAGAGCCCAGTTACTATCTCTTCCCTGGTGGTCTAGTGGTTAGGATTCGGCGCTCTCACCGCCGCGGCCCGGGTTCGATTCCCGGTCAGGGAAGTACACTTTTTCTCCTGATTTTCTAAATTTCATTACTGAA	152	.....((((.....(((((((((((((.(.....((((...((((((....)))).))...)))).))).))))))......)))))(((((.......)))))(((((((((.......)))).)))))................))))..	TGGTTAGGATTCGGCGCTCTCACCGCT	Other	27	27C>T	159	185	132	184	62	196	246	279	288	183	215	249	1626.62	2780.58	1822.93	2289.95	377.237	1207.56	994.687	1421.27	1291.67	1145.12	1403.71	1231.2	-2.12849	0.0163673	0.030965	1.26742	0.291679	0.596906	-1.67939	0.0169466	0.0515523
AS-tDR-000544	-	-	pre-chr17.trna3727-GluCTC	41	68	AATTCAGGTCTTAGGTCTTGCAGTAAGAGATCTTGCGAGTTCCCTGGTGGTCTAGTGGTTAGGATTCGGCGCTCTCACCGCCGCGGCCCGGGTTCGATTCCCGGTCAGGGAAGTAGGGCTTTTGTTATTCACAGACCTCGTTCAAACTTTTT	152	.....((((((.(((((((((.(((((....)))))...(((((.((((((..((((.(........).))))...))))))..((((.(((.......))))))).))))))))))))))...........))))))..............	TCCCTGGTGGTCTAGTGGTTAGGATTCG	Other	28	ExactMatch	216	66	74	64	84	108	130	105	98	83	57	60	2209.74	991.989	1021.94	796.505	511.095	665.389	525.648	534.887	439.527	519.37	372.145	296.676	-2.24192	0.0754398	0.111198	-1.37341	0.0427215	0.245845	-3.07907	0.0404094	0.0811962
AS-tDR-000060	-	-	pre-chr17.trna3727-GluCTC	41	71	AATTCAGGTCTTAGGTCTTGCAGTAAGAGATCTTGCGAGTTCCCTGGTGGTCTAGTGGTTAGGATTCGGCGCTCTCACCGCCGCGGCCCGGGTTCGATTCCCGGTCAGGGAAGTAGGGCTTTTGTTATTCACAGACCTCGTTCAAACTTTTT	152	.....((((((.(((((((((.(((((....)))))...(((((.((((((..((((.(........).))))...))))))..((((.(((.......))))))).))))))))))))))...........))))))..............	TCCCTGGTGGTCTAGTGGTTAGGATTCGGCG	Other	31	ExactMatch	108	64	79	75	249	232	310	359	406	191	169	238	1104.87	961.929	1090.99	933.405	1515.03	1429.35	1253.47	1828.81	1820.9	1195.18	1103.38	1176.81	1.47262	0.00922023	0.0201184	-1.1378	0.408887	0.672621	1.29426	0.131262	0.193949
AS-tDR-007247	-	-	pre-chr17.trna3727-GluCTC	41	72	AATTCAGGTCTTAGGTCTTGCAGTAAGAGATCTTGCGAGTTCCCTGGTGGTCTAGTGGTTAGGATTCGGCGCTCTCACCGCCGCGGCCCGGGTTCGATTCCCGGTCAGGGAAGTAGGGCTTTTGTTATTCACAGACCTCGTTCAAACTTTTT	152	.....((((((.(((((((((.(((((....)))))...(((((.((((((..((((.(........).))))...))))))..((((.(((.......))))))).))))))))))))))...........))))))..............	TCCCTGTGGTCTAGTGGTTAGGATTCGGCGCT	Other	32	6-G	320	272	269	264	1494	1399	1743	2199	1892	1364	1248	1757	3273.69	4088.2	3714.91	3285.58	9090.19	8619.26	7047.72	11202.1	8485.56	8535.19	8148.02	8687.65	2.50329	0.000852021	0.00530147	-1.0621	0.565419	0.845823	2.35692	6.45936e-07	0.000134748
AS-tDR-008177	-	-	pre-chr17.trna3727-GluCTC	41	73	AATTCAGGTCTTAGGTCTTGCAGTAAGAGATCTTGCGAGTTCCCTGGTGGTCTAGTGGTTAGGATTCGGCGCTCTCACCGCCGCGGCCCGGGTTCGATTCCCGGTCAGGGAAGTAGGGCTTTTGTTATTCACAGACCTCGTTCAAACTTTTT	152	.....((((((.(((((((((.(((((....)))))...(((((.((((((..((((.(........).))))...))))))..((((.(((.......))))))).))))))))))))))...........))))))..............	TCCCTGGTGGTCTAGTGGTTAGGATTCGGCGCA	Other	33	33T>A	120	82	103	84	452	448	553	712	569	351	362	457	1227.63	1232.47	1422.44	1045.41	2750.18	2760.13	2236.02	3627.05	2551.95	2196.37	2363.45	2259.68	2.30687	0.00166875	0.00838977	-1.21353	0.144923	0.410438	1.90096	5.30737e-05	0.00129394
AS-tDR-007322	-	-	pre-chr17.trna3727-GluCTC	41	73	AATTCAGGTCTTAGGTCTTGCAGTAAGAGATCTTGCGAGTTCCCTGGTGGTCTAGTGGTTAGGATTCGGCGCTCTCACCGCCGCGGCCCGGGTTCGATTCCCGGTCAGGGAAGTAGGGCTTTTGTTATTCACAGACCTCGTTCAAACTTTTT	152	.....((((((.(((((((((.(((((....)))))...(((((.((((((..((((.(........).))))...))))))..((((.(((.......))))))).))))))))))))))...........))))))..............	TCCCTGGTGGTCTAGTGGTTAGGATTCGGCGCC	Other	33	33T>C	73	71	69	61	305	309	376	465	443	261	279	360	746.811	1067.14	952.894	759.169	1855.76	1903.75	1520.33	2368.79	1986.84	1633.2	1821.55	1780.05	2.16788	0.00167178	0.00838977	-1.05909	0.592731	0.86926	2.04692	0.000129543	0.00256074
AS-tDR-001260	-	-	pre-chr17.trna3727-GluCTC	41	73	AATTCAGGTCTTAGGTCTTGCAGTAAGAGATCTTGCGAGTTCCCTGGTGGTCTAGTGGTTAGGATTCGGCGCTCTCACCGCCGCGGCCCGGGTTCGATTCCCGGTCAGGGAAGTAGGGCTTTTGTTATTCACAGACCTCGTTCAAACTTTTT	152	.....((((((.(((((((((.(((((....)))))...(((((.((((((..((((.(........).))))...))))))..((((.(((.......))))))).))))))))))))))...........))))))..............	TCCCTGGTGGTCTAGTGGTTAGGATTCGGCGCT	Other	33	ExactMatch	598	443	447	433	2559	2159	2795	3500	2946	1992	2079	2801	6117.71	6658.35	6173.1	5388.86	15570.1	13301.6	11301.4	17829.6	13212.7	12464.9	13573.5	13849.8	2.38299	0.00108768	0.0064677	-1.09231	0.428243	0.689905	2.18162	1.85303e-06	0.000147316
AS-tDR-001262	-	-	pre-chr17.trna3727-GluCTC	41	75	AATTCAGGTCTTAGGTCTTGCAGTAAGAGATCTTGCGAGTTCCCTGGTGGTCTAGTGGTTAGGATTCGGCGCTCTCACCGCCGCGGCCCGGGTTCGATTCCCGGTCAGGGAAGTAGGGCTTTTGTTATTCACAGACCTCGTTCAAACTTTTT	152	.....((((((.(((((((((.(((((....)))))...(((((.((((((..((((.(........).))))...))))))..((((.(((.......))))))).))))))))))))))...........))))))..............	TCCCTGGTGGTCTAGTGGTTAGGATTCGGCGCTCT	Other	35	ExactMatch	111	113	77	125	299	274	451	451	307	218	324	188	1135.56	1698.41	1063.37	1555.67	1819.25	1688.12	1823.59	2297.47	1376.89	1364.13	2115.35	929.584	1.39865	0.0381262	0.060912	-1.31822	0.151135	0.416503	1.06101	0.784595	0.798126
AS-tDR-000550	-	-	pre-chr17.trna3727-GluCTC	41	79	AATTCAGGTCTTAGGTCTTGCAGTAAGAGATCTTGCGAGTTCCCTGGTGGTCTAGTGGTTAGGATTCGGCGCTCTCACCGCCGCGGCCCGGGTTCGATTCCCGGTCAGGGAAGTAGGGCTTTTGTTATTCACAGACCTCGTTCAAACTTTTT	152	.....((((((.(((((((((.(((((....)))))...(((((.((((((..((((.(........).))))...))))))..((((.(((.......))))))).))))))))))))))...........))))))..............	TCCCTGGTGGTCTAGTGGTTAGGATTCGGCGCTCTCACC	Other	39	ExactMatch	238	248	243	241	167	260	687	324	296	261	186	213	2434.81	3727.47	3355.84	2999.34	1016.11	1601.86	2777.85	1650.51	1327.55	1633.2	1214.37	1053.2	-1.77601	0.024762	0.0430598	-1.34746	0.285808	0.595895	-2.3931	0.000922231	0.00818592
AS-tDR-009999	-	-	pre-chr17.trna3727-GluCTC	41	79	AATTCAGGTCTTAGGTCTTGCAGTAAGAGATCTTGCGAGTTCCCTGGTGGTCTAGTGGTTAGGATTCGGCGCTCTCACCGCCGCGGCCCGGGTTCGATTCCCGGTCAGGGAAGTAGGGCTTTTGTTATTCACAGACCTCGTTCAAACTTTTT	152	.....((((((.(((((((((.(((((....)))))...(((((.((((((..((((.(........).))))...))))))..((((.(((.......))))))).))))))))))))))...........))))))..............	TCCCTGGTGGTCTAGTGGTTAGGATTCGGCGCTCTCACT	Other	39	39C>T	369	340	293	305	187	336	777	389	357	306	222	232	3774.97	5110.25	4046.35	3795.85	1137.79	2070.1	3141.76	1981.63	1601.13	1914.79	1449.41	1147.15	-2.0073	0.00670834	0.016279	-1.36276	0.254938	0.568828	-2.73547	0.000289847	0.00369328
AS-tDR-002583	-	-	pre-chr17.trna3727-GluCTC	56	71	AATTCAGGTCTTAGGTCTTGCAGTAAGAGATCTTGCGAGTTCCCTGGTGGTCTAGTGGTTAGGATTCGGCGCTCTCACCGCCGCGGCCCGGGTTCGATTCCCGGTCAGGGAAGTAGGGCTTTTGTTATTCACAGACCTCGTTCAAACTTTTT	152	.....((((((.(((((((((.(((((....)))))...(((((.((((((..((((.(........).))))...))))))..((((.(((.......))))))).))))))))))))))...........))))))..............	TGGTTAGGATTCGGCG	Other	16	ExactMatch	136	168	160	79	31	111	194	47	199	165	257	166	1391.32	2525.06	2209.61	983.186	188.618	683.872	784.428	239.426	892.509	1032.48	1677.92	820.803	-3.7431	0.0151823	0.0294857	2.32995	0.0434444	0.245845	-1.60651	0.149894	0.204844
AS-tDR-011670	-	-	pre-chr17.trna3727-GluCTC	56	82	AATTCAGGTCTTAGGTCTTGCAGTAAGAGATCTTGCGAGTTCCCTGGTGGTCTAGTGGTTAGGATTCGGCGCTCTCACCGCCGCGGCCCGGGTTCGATTCCCGGTCAGGGAAGTAGGGCTTTTGTTATTCACAGACCTCGTTCAAACTTTTT	152	.....((((((.(((((((((.(((((....)))))...(((((.((((((..((((.(........).))))...))))))..((((.(((.......))))))).))))))))))))))...........))))))..............	TGGTTAGGATTCGGCGCTCTCACCGCT	Other	27	27C>T	159	185	132	184	62	196	246	279	288	183	215	249	1626.62	2780.58	1822.93	2289.95	377.237	1207.56	994.687	1421.27	1291.67	1145.12	1403.71	1231.2	-2.12849	0.0163673	0.030965	1.26742	0.291679	0.596906	-1.67939	0.0169466	0.0515523
AS-tDR-000544	-	-	pre-chr2.trna7561-GluCTC	41	68	CTTGGAGTCATATGAGCTTAATGGGAGGTAGCAACCAGCTTCCCTGGTGGTCTAGTGGTTAGGATTCGGCGCTCTCACCGCCGCGGCCCGGGTTCGATTCCCGGTCAGGGAAATACTGTTTTTGTCTCAACCTTCTAGAGAAATAAAAAAAA	152	..........(((...(((..(((((((((((((.(((.(((((.((((((..((((.(........).))))...))))))..((((.(((.......))))))).)))))...)))...))).))..)))))))))))..))).......	TCCCTGGTGGTCTAGTGGTTAGGATTCG	Other	28	ExactMatch	216	66	74	64	84	108	130	105	98	83	57	60	2209.74	991.989	1021.94	796.505	511.095	665.389	525.648	534.887	439.527	519.37	372.145	296.676	-2.24192	0.0754398	0.111198	-1.37341	0.0427215	0.245845	-3.07907	0.0404094	0.0811962
AS-tDR-000060	-	-	pre-chr2.trna7561-GluCTC	41	71	CTTGGAGTCATATGAGCTTAATGGGAGGTAGCAACCAGCTTCCCTGGTGGTCTAGTGGTTAGGATTCGGCGCTCTCACCGCCGCGGCCCGGGTTCGATTCCCGGTCAGGGAAATACTGTTTTTGTCTCAACCTTCTAGAGAAATAAAAAAAA	152	..........(((...(((..(((((((((((((.(((.(((((.((((((..((((.(........).))))...))))))..((((.(((.......))))))).)))))...)))...))).))..)))))))))))..))).......	TCCCTGGTGGTCTAGTGGTTAGGATTCGGCG	Other	31	ExactMatch	108	64	79	75	249	232	310	359	406	191	169	238	1104.87	961.929	1090.99	933.405	1515.03	1429.35	1253.47	1828.81	1820.9	1195.18	1103.38	1176.81	1.47262	0.00922023	0.0201184	-1.1378	0.408887	0.672621	1.29426	0.131262	0.193949
AS-tDR-007247	-	-	pre-chr2.trna7561-GluCTC	41	72	CTTGGAGTCATATGAGCTTAATGGGAGGTAGCAACCAGCTTCCCTGGTGGTCTAGTGGTTAGGATTCGGCGCTCTCACCGCCGCGGCCCGGGTTCGATTCCCGGTCAGGGAAATACTGTTTTTGTCTCAACCTTCTAGAGAAATAAAAAAAA	152	..........(((...(((..(((((((((((((.(((.(((((.((((((..((((.(........).))))...))))))..((((.(((.......))))))).)))))...)))...))).))..)))))))))))..))).......	TCCCTGTGGTCTAGTGGTTAGGATTCGGCGCT	Other	32	6-G	320	272	269	264	1494	1399	1743	2199	1892	1364	1248	1757	3273.69	4088.2	3714.91	3285.58	9090.19	8619.26	7047.72	11202.1	8485.56	8535.19	8148.02	8687.65	2.50329	0.000852021	0.00530147	-1.0621	0.565419	0.845823	2.35692	6.45936e-07	0.000134748
AS-tDR-008177	-	-	pre-chr2.trna7561-GluCTC	41	73	CTTGGAGTCATATGAGCTTAATGGGAGGTAGCAACCAGCTTCCCTGGTGGTCTAGTGGTTAGGATTCGGCGCTCTCACCGCCGCGGCCCGGGTTCGATTCCCGGTCAGGGAAATACTGTTTTTGTCTCAACCTTCTAGAGAAATAAAAAAAA	152	..........(((...(((..(((((((((((((.(((.(((((.((((((..((((.(........).))))...))))))..((((.(((.......))))))).)))))...)))...))).))..)))))))))))..))).......	TCCCTGGTGGTCTAGTGGTTAGGATTCGGCGCA	Other	33	33T>A	120	82	103	84	452	448	553	712	569	351	362	457	1227.63	1232.47	1422.44	1045.41	2750.18	2760.13	2236.02	3627.05	2551.95	2196.37	2363.45	2259.68	2.30687	0.00166875	0.00838977	-1.21353	0.144923	0.410438	1.90096	5.30737e-05	0.00129394
AS-tDR-007322	-	-	pre-chr2.trna7561-GluCTC	41	73	CTTGGAGTCATATGAGCTTAATGGGAGGTAGCAACCAGCTTCCCTGGTGGTCTAGTGGTTAGGATTCGGCGCTCTCACCGCCGCGGCCCGGGTTCGATTCCCGGTCAGGGAAATACTGTTTTTGTCTCAACCTTCTAGAGAAATAAAAAAAA	152	..........(((...(((..(((((((((((((.(((.(((((.((((((..((((.(........).))))...))))))..((((.(((.......))))))).)))))...)))...))).))..)))))))))))..))).......	TCCCTGGTGGTCTAGTGGTTAGGATTCGGCGCC	Other	33	33T>C	73	71	69	61	305	309	376	465	443	261	279	360	746.811	1067.14	952.894	759.169	1855.76	1903.75	1520.33	2368.79	1986.84	1633.2	1821.55	1780.05	2.16788	0.00167178	0.00838977	-1.05909	0.592731	0.86926	2.04692	0.000129543	0.00256074
AS-tDR-001260	-	-	pre-chr2.trna7561-GluCTC	41	73	CTTGGAGTCATATGAGCTTAATGGGAGGTAGCAACCAGCTTCCCTGGTGGTCTAGTGGTTAGGATTCGGCGCTCTCACCGCCGCGGCCCGGGTTCGATTCCCGGTCAGGGAAATACTGTTTTTGTCTCAACCTTCTAGAGAAATAAAAAAAA	152	..........(((...(((..(((((((((((((.(((.(((((.((((((..((((.(........).))))...))))))..((((.(((.......))))))).)))))...)))...))).))..)))))))))))..))).......	TCCCTGGTGGTCTAGTGGTTAGGATTCGGCGCT	Other	33	ExactMatch	598	443	447	433	2559	2159	2795	3500	2946	1992	2079	2801	6117.71	6658.35	6173.1	5388.86	15570.1	13301.6	11301.4	17829.6	13212.7	12464.9	13573.5	13849.8	2.38299	0.00108768	0.0064677	-1.09231	0.428243	0.689905	2.18162	1.85303e-06	0.000147316
AS-tDR-001262	-	-	pre-chr2.trna7561-GluCTC	41	75	CTTGGAGTCATATGAGCTTAATGGGAGGTAGCAACCAGCTTCCCTGGTGGTCTAGTGGTTAGGATTCGGCGCTCTCACCGCCGCGGCCCGGGTTCGATTCCCGGTCAGGGAAATACTGTTTTTGTCTCAACCTTCTAGAGAAATAAAAAAAA	152	..........(((...(((..(((((((((((((.(((.(((((.((((((..((((.(........).))))...))))))..((((.(((.......))))))).)))))...)))...))).))..)))))))))))..))).......	TCCCTGGTGGTCTAGTGGTTAGGATTCGGCGCTCT	Other	35	ExactMatch	111	113	77	125	299	274	451	451	307	218	324	188	1135.56	1698.41	1063.37	1555.67	1819.25	1688.12	1823.59	2297.47	1376.89	1364.13	2115.35	929.584	1.39865	0.0381262	0.060912	-1.31822	0.151135	0.416503	1.06101	0.784595	0.798126
AS-tDR-000550	-	-	pre-chr2.trna7561-GluCTC	41	79	CTTGGAGTCATATGAGCTTAATGGGAGGTAGCAACCAGCTTCCCTGGTGGTCTAGTGGTTAGGATTCGGCGCTCTCACCGCCGCGGCCCGGGTTCGATTCCCGGTCAGGGAAATACTGTTTTTGTCTCAACCTTCTAGAGAAATAAAAAAAA	152	..........(((...(((..(((((((((((((.(((.(((((.((((((..((((.(........).))))...))))))..((((.(((.......))))))).)))))...)))...))).))..)))))))))))..))).......	TCCCTGGTGGTCTAGTGGTTAGGATTCGGCGCTCTCACC	Other	39	ExactMatch	238	248	243	241	167	260	687	324	296	261	186	213	2434.81	3727.47	3355.84	2999.34	1016.11	1601.86	2777.85	1650.51	1327.55	1633.2	1214.37	1053.2	-1.77601	0.024762	0.0430598	-1.34746	0.285808	0.595895	-2.3931	0.000922231	0.00818592
AS-tDR-009999	-	-	pre-chr2.trna7561-GluCTC	41	79	CTTGGAGTCATATGAGCTTAATGGGAGGTAGCAACCAGCTTCCCTGGTGGTCTAGTGGTTAGGATTCGGCGCTCTCACCGCCGCGGCCCGGGTTCGATTCCCGGTCAGGGAAATACTGTTTTTGTCTCAACCTTCTAGAGAAATAAAAAAAA	152	..........(((...(((..(((((((((((((.(((.(((((.((((((..((((.(........).))))...))))))..((((.(((.......))))))).)))))...)))...))).))..)))))))))))..))).......	TCCCTGGTGGTCTAGTGGTTAGGATTCGGCGCTCTCACT	Other	39	39C>T	369	340	293	305	187	336	777	389	357	306	222	232	3774.97	5110.25	4046.35	3795.85	1137.79	2070.1	3141.76	1981.63	1601.13	1914.79	1449.41	1147.15	-2.0073	0.00670834	0.016279	-1.36276	0.254938	0.568828	-2.73547	0.000289847	0.00369328
AS-tDR-002583	-	-	pre-chr2.trna7561-GluCTC	56	71	CTTGGAGTCATATGAGCTTAATGGGAGGTAGCAACCAGCTTCCCTGGTGGTCTAGTGGTTAGGATTCGGCGCTCTCACCGCCGCGGCCCGGGTTCGATTCCCGGTCAGGGAAATACTGTTTTTGTCTCAACCTTCTAGAGAAATAAAAAAAA	152	..........(((...(((..(((((((((((((.(((.(((((.((((((..((((.(........).))))...))))))..((((.(((.......))))))).)))))...)))...))).))..)))))))))))..))).......	TGGTTAGGATTCGGCG	Other	16	ExactMatch	136	168	160	79	31	111	194	47	199	165	257	166	1391.32	2525.06	2209.61	983.186	188.618	683.872	784.428	239.426	892.509	1032.48	1677.92	820.803	-3.7431	0.0151823	0.0294857	2.32995	0.0434444	0.245845	-1.60651	0.149894	0.204844
AS-tDR-011670	-	-	pre-chr2.trna7561-GluCTC	56	82	CTTGGAGTCATATGAGCTTAATGGGAGGTAGCAACCAGCTTCCCTGGTGGTCTAGTGGTTAGGATTCGGCGCTCTCACCGCCGCGGCCCGGGTTCGATTCCCGGTCAGGGAAATACTGTTTTTGTCTCAACCTTCTAGAGAAATAAAAAAAA	152	..........(((...(((..(((((((((((((.(((.(((((.((((((..((((.(........).))))...))))))..((((.(((.......))))))).)))))...)))...))).))..)))))))))))..))).......	TGGTTAGGATTCGGCGCTCTCACCGCT	Other	27	27C>T	159	185	132	184	62	196	246	279	288	183	215	249	1626.62	2780.58	1822.93	2289.95	377.237	1207.56	994.687	1421.27	1291.67	1145.12	1403.71	1231.2	-2.12849	0.0163673	0.030965	1.26742	0.291679	0.596906	-1.67939	0.0169466	0.0515523
AS-tDR-000544	-	-	pre-chr2.trna7565-GluCTC	41	68	CTTGGAGTCATATGAGCTTAATGGGAGGTAGCAACCAGCTTCCCTGGTGGTCTAGTGGTTAGGATTCGGCGCTCTCACCGCCGCGGCCCGGGTTCGATTCCCGGTCAGGGAAATACTGTTTTTGTCTCAACCTTCTAGAGAAATAAAAAAAA	152	..........(((...(((..(((((((((((((.(((.(((((.((((((..((((.(........).))))...))))))..((((.(((.......))))))).)))))...)))...))).))..)))))))))))..))).......	TCCCTGGTGGTCTAGTGGTTAGGATTCG	Other	28	ExactMatch	216	66	74	64	84	108	130	105	98	83	57	60	2209.74	991.989	1021.94	796.505	511.095	665.389	525.648	534.887	439.527	519.37	372.145	296.676	-2.24192	0.0754398	0.111198	-1.37341	0.0427215	0.245845	-3.07907	0.0404094	0.0811962
AS-tDR-000060	-	-	pre-chr2.trna7565-GluCTC	41	71	CTTGGAGTCATATGAGCTTAATGGGAGGTAGCAACCAGCTTCCCTGGTGGTCTAGTGGTTAGGATTCGGCGCTCTCACCGCCGCGGCCCGGGTTCGATTCCCGGTCAGGGAAATACTGTTTTTGTCTCAACCTTCTAGAGAAATAAAAAAAA	152	..........(((...(((..(((((((((((((.(((.(((((.((((((..((((.(........).))))...))))))..((((.(((.......))))))).)))))...)))...))).))..)))))))))))..))).......	TCCCTGGTGGTCTAGTGGTTAGGATTCGGCG	Other	31	ExactMatch	108	64	79	75	249	232	310	359	406	191	169	238	1104.87	961.929	1090.99	933.405	1515.03	1429.35	1253.47	1828.81	1820.9	1195.18	1103.38	1176.81	1.47262	0.00922023	0.0201184	-1.1378	0.408887	0.672621	1.29426	0.131262	0.193949
AS-tDR-007247	-	-	pre-chr2.trna7565-GluCTC	41	72	CTTGGAGTCATATGAGCTTAATGGGAGGTAGCAACCAGCTTCCCTGGTGGTCTAGTGGTTAGGATTCGGCGCTCTCACCGCCGCGGCCCGGGTTCGATTCCCGGTCAGGGAAATACTGTTTTTGTCTCAACCTTCTAGAGAAATAAAAAAAA	152	..........(((...(((..(((((((((((((.(((.(((((.((((((..((((.(........).))))...))))))..((((.(((.......))))))).)))))...)))...))).))..)))))))))))..))).......	TCCCTGTGGTCTAGTGGTTAGGATTCGGCGCT	Other	32	6-G	320	272	269	264	1494	1399	1743	2199	1892	1364	1248	1757	3273.69	4088.2	3714.91	3285.58	9090.19	8619.26	7047.72	11202.1	8485.56	8535.19	8148.02	8687.65	2.50329	0.000852021	0.00530147	-1.0621	0.565419	0.845823	2.35692	6.45936e-07	0.000134748
AS-tDR-008177	-	-	pre-chr2.trna7565-GluCTC	41	73	CTTGGAGTCATATGAGCTTAATGGGAGGTAGCAACCAGCTTCCCTGGTGGTCTAGTGGTTAGGATTCGGCGCTCTCACCGCCGCGGCCCGGGTTCGATTCCCGGTCAGGGAAATACTGTTTTTGTCTCAACCTTCTAGAGAAATAAAAAAAA	152	..........(((...(((..(((((((((((((.(((.(((((.((((((..((((.(........).))))...))))))..((((.(((.......))))))).)))))...)))...))).))..)))))))))))..))).......	TCCCTGGTGGTCTAGTGGTTAGGATTCGGCGCA	Other	33	33T>A	120	82	103	84	452	448	553	712	569	351	362	457	1227.63	1232.47	1422.44	1045.41	2750.18	2760.13	2236.02	3627.05	2551.95	2196.37	2363.45	2259.68	2.30687	0.00166875	0.00838977	-1.21353	0.144923	0.410438	1.90096	5.30737e-05	0.00129394
AS-tDR-007322	-	-	pre-chr2.trna7565-GluCTC	41	73	CTTGGAGTCATATGAGCTTAATGGGAGGTAGCAACCAGCTTCCCTGGTGGTCTAGTGGTTAGGATTCGGCGCTCTCACCGCCGCGGCCCGGGTTCGATTCCCGGTCAGGGAAATACTGTTTTTGTCTCAACCTTCTAGAGAAATAAAAAAAA	152	..........(((...(((..(((((((((((((.(((.(((((.((((((..((((.(........).))))...))))))..((((.(((.......))))))).)))))...)))...))).))..)))))))))))..))).......	TCCCTGGTGGTCTAGTGGTTAGGATTCGGCGCC	Other	33	33T>C	73	71	69	61	305	309	376	465	443	261	279	360	746.811	1067.14	952.894	759.169	1855.76	1903.75	1520.33	2368.79	1986.84	1633.2	1821.55	1780.05	2.16788	0.00167178	0.00838977	-1.05909	0.592731	0.86926	2.04692	0.000129543	0.00256074
AS-tDR-001260	-	-	pre-chr2.trna7565-GluCTC	41	73	CTTGGAGTCATATGAGCTTAATGGGAGGTAGCAACCAGCTTCCCTGGTGGTCTAGTGGTTAGGATTCGGCGCTCTCACCGCCGCGGCCCGGGTTCGATTCCCGGTCAGGGAAATACTGTTTTTGTCTCAACCTTCTAGAGAAATAAAAAAAA	152	..........(((...(((..(((((((((((((.(((.(((((.((((((..((((.(........).))))...))))))..((((.(((.......))))))).)))))...)))...))).))..)))))))))))..))).......	TCCCTGGTGGTCTAGTGGTTAGGATTCGGCGCT	Other	33	ExactMatch	598	443	447	433	2559	2159	2795	3500	2946	1992	2079	2801	6117.71	6658.35	6173.1	5388.86	15570.1	13301.6	11301.4	17829.6	13212.7	12464.9	13573.5	13849.8	2.38299	0.00108768	0.0064677	-1.09231	0.428243	0.689905	2.18162	1.85303e-06	0.000147316
AS-tDR-001262	-	-	pre-chr2.trna7565-GluCTC	41	75	CTTGGAGTCATATGAGCTTAATGGGAGGTAGCAACCAGCTTCCCTGGTGGTCTAGTGGTTAGGATTCGGCGCTCTCACCGCCGCGGCCCGGGTTCGATTCCCGGTCAGGGAAATACTGTTTTTGTCTCAACCTTCTAGAGAAATAAAAAAAA	152	..........(((...(((..(((((((((((((.(((.(((((.((((((..((((.(........).))))...))))))..((((.(((.......))))))).)))))...)))...))).))..)))))))))))..))).......	TCCCTGGTGGTCTAGTGGTTAGGATTCGGCGCTCT	Other	35	ExactMatch	111	113	77	125	299	274	451	451	307	218	324	188	1135.56	1698.41	1063.37	1555.67	1819.25	1688.12	1823.59	2297.47	1376.89	1364.13	2115.35	929.584	1.39865	0.0381262	0.060912	-1.31822	0.151135	0.416503	1.06101	0.784595	0.798126
AS-tDR-000550	-	-	pre-chr2.trna7565-GluCTC	41	79	CTTGGAGTCATATGAGCTTAATGGGAGGTAGCAACCAGCTTCCCTGGTGGTCTAGTGGTTAGGATTCGGCGCTCTCACCGCCGCGGCCCGGGTTCGATTCCCGGTCAGGGAAATACTGTTTTTGTCTCAACCTTCTAGAGAAATAAAAAAAA	152	..........(((...(((..(((((((((((((.(((.(((((.((((((..((((.(........).))))...))))))..((((.(((.......))))))).)))))...)))...))).))..)))))))))))..))).......	TCCCTGGTGGTCTAGTGGTTAGGATTCGGCGCTCTCACC	Other	39	ExactMatch	238	248	243	241	167	260	687	324	296	261	186	213	2434.81	3727.47	3355.84	2999.34	1016.11	1601.86	2777.85	1650.51	1327.55	1633.2	1214.37	1053.2	-1.77601	0.024762	0.0430598	-1.34746	0.285808	0.595895	-2.3931	0.000922231	0.00818592
AS-tDR-009999	-	-	pre-chr2.trna7565-GluCTC	41	79	CTTGGAGTCATATGAGCTTAATGGGAGGTAGCAACCAGCTTCCCTGGTGGTCTAGTGGTTAGGATTCGGCGCTCTCACCGCCGCGGCCCGGGTTCGATTCCCGGTCAGGGAAATACTGTTTTTGTCTCAACCTTCTAGAGAAATAAAAAAAA	152	..........(((...(((..(((((((((((((.(((.(((((.((((((..((((.(........).))))...))))))..((((.(((.......))))))).)))))...)))...))).))..)))))))))))..))).......	TCCCTGGTGGTCTAGTGGTTAGGATTCGGCGCTCTCACT	Other	39	39C>T	369	340	293	305	187	336	777	389	357	306	222	232	3774.97	5110.25	4046.35	3795.85	1137.79	2070.1	3141.76	1981.63	1601.13	1914.79	1449.41	1147.15	-2.0073	0.00670834	0.016279	-1.36276	0.254938	0.568828	-2.73547	0.000289847	0.00369328
AS-tDR-002583	-	-	pre-chr2.trna7565-GluCTC	56	71	CTTGGAGTCATATGAGCTTAATGGGAGGTAGCAACCAGCTTCCCTGGTGGTCTAGTGGTTAGGATTCGGCGCTCTCACCGCCGCGGCCCGGGTTCGATTCCCGGTCAGGGAAATACTGTTTTTGTCTCAACCTTCTAGAGAAATAAAAAAAA	152	..........(((...(((..(((((((((((((.(((.(((((.((((((..((((.(........).))))...))))))..((((.(((.......))))))).)))))...)))...))).))..)))))))))))..))).......	TGGTTAGGATTCGGCG	Other	16	ExactMatch	136	168	160	79	31	111	194	47	199	165	257	166	1391.32	2525.06	2209.61	983.186	188.618	683.872	784.428	239.426	892.509	1032.48	1677.92	820.803	-3.7431	0.0151823	0.0294857	2.32995	0.0434444	0.245845	-1.60651	0.149894	0.204844
AS-tDR-011670	-	-	pre-chr2.trna7565-GluCTC	56	82	CTTGGAGTCATATGAGCTTAATGGGAGGTAGCAACCAGCTTCCCTGGTGGTCTAGTGGTTAGGATTCGGCGCTCTCACCGCCGCGGCCCGGGTTCGATTCCCGGTCAGGGAAATACTGTTTTTGTCTCAACCTTCTAGAGAAATAAAAAAAA	152	..........(((...(((..(((((((((((((.(((.(((((.((((((..((((.(........).))))...))))))..((((.(((.......))))))).)))))...)))...))).))..)))))))))))..))).......	TGGTTAGGATTCGGCGCTCTCACCGCT	Other	27	27C>T	159	185	132	184	62	196	246	279	288	183	215	249	1626.62	2780.58	1822.93	2289.95	377.237	1207.56	994.687	1421.27	1291.67	1145.12	1403.71	1231.2	-2.12849	0.0163673	0.030965	1.26742	0.291679	0.596906	-1.67939	0.0169466	0.0515523
AS-tDR-000544	-	-	pre-chr13.trna2251-GluCTC	41	68	TTAGTCCTAGGTATTCTAAGCGGGAGGCAACTACTGTCCCTCCCTGGTGGTCTAGTGGTTAGGATTCGGCGCTCTCACCGCCGCGGCCCGGGTTCGATTCCCGGTCAGGGAAGCTGCCTTTTTTAAAACCTTATTCTTACCCACCATTTCAG	152	.....................((((((..((....)).)))))).(((((...((.((((.((...(((((.......)))))...)).((((....(((((.....)))))...)))).......)))).....))...))))).......	TCCCTGGTGGTCTAGTGGTTAGGATTCG	Other	28	ExactMatch	216	66	74	64	84	108	130	105	98	83	57	60	2209.74	991.989	1021.94	796.505	511.095	665.389	525.648	534.887	439.527	519.37	372.145	296.676	-2.24192	0.0754398	0.111198	-1.37341	0.0427215	0.245845	-3.07907	0.0404094	0.0811962
AS-tDR-000060	-	-	pre-chr13.trna2251-GluCTC	41	71	TTAGTCCTAGGTATTCTAAGCGGGAGGCAACTACTGTCCCTCCCTGGTGGTCTAGTGGTTAGGATTCGGCGCTCTCACCGCCGCGGCCCGGGTTCGATTCCCGGTCAGGGAAGCTGCCTTTTTTAAAACCTTATTCTTACCCACCATTTCAG	152	.....................((((((..((....)).)))))).(((((...((.((((.((...(((((.......)))))...)).((((....(((((.....)))))...)))).......)))).....))...))))).......	TCCCTGGTGGTCTAGTGGTTAGGATTCGGCG	Other	31	ExactMatch	108	64	79	75	249	232	310	359	406	191	169	238	1104.87	961.929	1090.99	933.405	1515.03	1429.35	1253.47	1828.81	1820.9	1195.18	1103.38	1176.81	1.47262	0.00922023	0.0201184	-1.1378	0.408887	0.672621	1.29426	0.131262	0.193949
AS-tDR-007247	-	-	pre-chr13.trna2251-GluCTC	41	72	TTAGTCCTAGGTATTCTAAGCGGGAGGCAACTACTGTCCCTCCCTGGTGGTCTAGTGGTTAGGATTCGGCGCTCTCACCGCCGCGGCCCGGGTTCGATTCCCGGTCAGGGAAGCTGCCTTTTTTAAAACCTTATTCTTACCCACCATTTCAG	152	.....................((((((..((....)).)))))).(((((...((.((((.((...(((((.......)))))...)).((((....(((((.....)))))...)))).......)))).....))...))))).......	TCCCTGTGGTCTAGTGGTTAGGATTCGGCGCT	Other	32	6-G	320	272	269	264	1494	1399	1743	2199	1892	1364	1248	1757	3273.69	4088.2	3714.91	3285.58	9090.19	8619.26	7047.72	11202.1	8485.56	8535.19	8148.02	8687.65	2.50329	0.000852021	0.00530147	-1.0621	0.565419	0.845823	2.35692	6.45936e-07	0.000134748
AS-tDR-008177	-	-	pre-chr13.trna2251-GluCTC	41	73	TTAGTCCTAGGTATTCTAAGCGGGAGGCAACTACTGTCCCTCCCTGGTGGTCTAGTGGTTAGGATTCGGCGCTCTCACCGCCGCGGCCCGGGTTCGATTCCCGGTCAGGGAAGCTGCCTTTTTTAAAACCTTATTCTTACCCACCATTTCAG	152	.....................((((((..((....)).)))))).(((((...((.((((.((...(((((.......)))))...)).((((....(((((.....)))))...)))).......)))).....))...))))).......	TCCCTGGTGGTCTAGTGGTTAGGATTCGGCGCA	Other	33	33T>A	120	82	103	84	452	448	553	712	569	351	362	457	1227.63	1232.47	1422.44	1045.41	2750.18	2760.13	2236.02	3627.05	2551.95	2196.37	2363.45	2259.68	2.30687	0.00166875	0.00838977	-1.21353	0.144923	0.410438	1.90096	5.30737e-05	0.00129394
AS-tDR-007322	-	-	pre-chr13.trna2251-GluCTC	41	73	TTAGTCCTAGGTATTCTAAGCGGGAGGCAACTACTGTCCCTCCCTGGTGGTCTAGTGGTTAGGATTCGGCGCTCTCACCGCCGCGGCCCGGGTTCGATTCCCGGTCAGGGAAGCTGCCTTTTTTAAAACCTTATTCTTACCCACCATTTCAG	152	.....................((((((..((....)).)))))).(((((...((.((((.((...(((((.......)))))...)).((((....(((((.....)))))...)))).......)))).....))...))))).......	TCCCTGGTGGTCTAGTGGTTAGGATTCGGCGCC	Other	33	33T>C	73	71	69	61	305	309	376	465	443	261	279	360	746.811	1067.14	952.894	759.169	1855.76	1903.75	1520.33	2368.79	1986.84	1633.2	1821.55	1780.05	2.16788	0.00167178	0.00838977	-1.05909	0.592731	0.86926	2.04692	0.000129543	0.00256074
AS-tDR-001260	-	-	pre-chr13.trna2251-GluCTC	41	73	TTAGTCCTAGGTATTCTAAGCGGGAGGCAACTACTGTCCCTCCCTGGTGGTCTAGTGGTTAGGATTCGGCGCTCTCACCGCCGCGGCCCGGGTTCGATTCCCGGTCAGGGAAGCTGCCTTTTTTAAAACCTTATTCTTACCCACCATTTCAG	152	.....................((((((..((....)).)))))).(((((...((.((((.((...(((((.......)))))...)).((((....(((((.....)))))...)))).......)))).....))...))))).......	TCCCTGGTGGTCTAGTGGTTAGGATTCGGCGCT	Other	33	ExactMatch	598	443	447	433	2559	2159	2795	3500	2946	1992	2079	2801	6117.71	6658.35	6173.1	5388.86	15570.1	13301.6	11301.4	17829.6	13212.7	12464.9	13573.5	13849.8	2.38299	0.00108768	0.0064677	-1.09231	0.428243	0.689905	2.18162	1.85303e-06	0.000147316
AS-tDR-001262	-	-	pre-chr13.trna2251-GluCTC	41	75	TTAGTCCTAGGTATTCTAAGCGGGAGGCAACTACTGTCCCTCCCTGGTGGTCTAGTGGTTAGGATTCGGCGCTCTCACCGCCGCGGCCCGGGTTCGATTCCCGGTCAGGGAAGCTGCCTTTTTTAAAACCTTATTCTTACCCACCATTTCAG	152	.....................((((((..((....)).)))))).(((((...((.((((.((...(((((.......)))))...)).((((....(((((.....)))))...)))).......)))).....))...))))).......	TCCCTGGTGGTCTAGTGGTTAGGATTCGGCGCTCT	Other	35	ExactMatch	111	113	77	125	299	274	451	451	307	218	324	188	1135.56	1698.41	1063.37	1555.67	1819.25	1688.12	1823.59	2297.47	1376.89	1364.13	2115.35	929.584	1.39865	0.0381262	0.060912	-1.31822	0.151135	0.416503	1.06101	0.784595	0.798126
AS-tDR-000550	-	-	pre-chr13.trna2251-GluCTC	41	79	TTAGTCCTAGGTATTCTAAGCGGGAGGCAACTACTGTCCCTCCCTGGTGGTCTAGTGGTTAGGATTCGGCGCTCTCACCGCCGCGGCCCGGGTTCGATTCCCGGTCAGGGAAGCTGCCTTTTTTAAAACCTTATTCTTACCCACCATTTCAG	152	.....................((((((..((....)).)))))).(((((...((.((((.((...(((((.......)))))...)).((((....(((((.....)))))...)))).......)))).....))...))))).......	TCCCTGGTGGTCTAGTGGTTAGGATTCGGCGCTCTCACC	Other	39	ExactMatch	238	248	243	241	167	260	687	324	296	261	186	213	2434.81	3727.47	3355.84	2999.34	1016.11	1601.86	2777.85	1650.51	1327.55	1633.2	1214.37	1053.2	-1.77601	0.024762	0.0430598	-1.34746	0.285808	0.595895	-2.3931	0.000922231	0.00818592
AS-tDR-009999	-	-	pre-chr13.trna2251-GluCTC	41	79	TTAGTCCTAGGTATTCTAAGCGGGAGGCAACTACTGTCCCTCCCTGGTGGTCTAGTGGTTAGGATTCGGCGCTCTCACCGCCGCGGCCCGGGTTCGATTCCCGGTCAGGGAAGCTGCCTTTTTTAAAACCTTATTCTTACCCACCATTTCAG	152	.....................((((((..((....)).)))))).(((((...((.((((.((...(((((.......)))))...)).((((....(((((.....)))))...)))).......)))).....))...))))).......	TCCCTGGTGGTCTAGTGGTTAGGATTCGGCGCTCTCACT	Other	39	39C>T	369	340	293	305	187	336	777	389	357	306	222	232	3774.97	5110.25	4046.35	3795.85	1137.79	2070.1	3141.76	1981.63	1601.13	1914.79	1449.41	1147.15	-2.0073	0.00670834	0.016279	-1.36276	0.254938	0.568828	-2.73547	0.000289847	0.00369328
AS-tDR-002583	-	-	pre-chr13.trna2251-GluCTC	56	71	TTAGTCCTAGGTATTCTAAGCGGGAGGCAACTACTGTCCCTCCCTGGTGGTCTAGTGGTTAGGATTCGGCGCTCTCACCGCCGCGGCCCGGGTTCGATTCCCGGTCAGGGAAGCTGCCTTTTTTAAAACCTTATTCTTACCCACCATTTCAG	152	.....................((((((..((....)).)))))).(((((...((.((((.((...(((((.......)))))...)).((((....(((((.....)))))...)))).......)))).....))...))))).......	TGGTTAGGATTCGGCG	Other	16	ExactMatch	136	168	160	79	31	111	194	47	199	165	257	166	1391.32	2525.06	2209.61	983.186	188.618	683.872	784.428	239.426	892.509	1032.48	1677.92	820.803	-3.7431	0.0151823	0.0294857	2.32995	0.0434444	0.245845	-1.60651	0.149894	0.204844
AS-tDR-011670	-	-	pre-chr13.trna2251-GluCTC	56	82	TTAGTCCTAGGTATTCTAAGCGGGAGGCAACTACTGTCCCTCCCTGGTGGTCTAGTGGTTAGGATTCGGCGCTCTCACCGCCGCGGCCCGGGTTCGATTCCCGGTCAGGGAAGCTGCCTTTTTTAAAACCTTATTCTTACCCACCATTTCAG	152	.....................((((((..((....)).)))))).(((((...((.((((.((...(((((.......)))))...)).((((....(((((.....)))))...)))).......)))).....))...))))).......	TGGTTAGGATTCGGCGCTCTCACCGCT	Other	27	27C>T	159	185	132	184	62	196	246	279	288	183	215	249	1626.62	2780.58	1822.93	2289.95	377.237	1207.56	994.687	1421.27	1291.67	1145.12	1403.71	1231.2	-2.12849	0.0163673	0.030965	1.26742	0.291679	0.596906	-1.67939	0.0169466	0.0515523
AS-tDR-007534	-	-	chr10.trna12493-LysCTT	1	33	GCCCGGCTAGCTCAGTCGGTAGAGCATGAGACTCTTAATCTCAGGGTCGTGGGTTCGAGCCCCACGTTGGGCGCCA	76	)))))))..))))........((((.))))).......(((((.....))))).......((((((((((((.	GCCCGGCTAGCTCAGTCGGTAGAGCATGAGACA	tiRNA-5	33	33T>A	99	61	59	79	70	71	106	112	195	114	123	124	1012.8	916.838	814.793	983.186	425.913	437.432	428.605	570.547	874.569	713.352	803.05	613.13	-1.99926	0.000165713	0.00200004	1.61163	0.00515907	0.131019	-1.24052	0.0449082	0.0873126
AS-tDR-001358	-	-	chr10.trna12493-LysCTT	1	33	GCCCGGCTAGCTCAGTCGGTAGAGCATGAGACTCTTAATCTCAGGGTCGTGGGTTCGAGCCCCACGTTGGGCGCCA	76	)))))))..))))........((((.))))).......(((((.....))))).......((((((((((((.	GCCCGGCTAGCTCAGTCGGTAGAGCATGAGACT	tiRNA-5	33	ExactMatch	553	437	435	468	457	451	608	725	1144	662	806	1014	5657.35	6568.17	6007.37	5824.45	2780.6	2778.62	2458.41	3693.27	5130.8	4142.45	5262.26	5013.82	-2.05391	8.7218e-05	0.00124332	1.6691	0.00177493	0.0983473	-1.23055	0.0127558	0.0436369
AS-tDR-001359	-	-	chr10.trna12493-LysCTT	1	34	GCCCGGCTAGCTCAGTCGGTAGAGCATGAGACTCTTAATCTCAGGGTCGTGGGTTCGAGCCCCACGTTGGGCGCCA	76	)))))))..))))........((((.))))).......(((((.....))))).......((((((((((((.	GCCCGGCTAGCTCAGTCGGTAGAGCATGAGACTC	tiRNA-5	34	ExactMatch	89	55	70	53	81	91	149	189	156	85	86	82	910.495	826.657	966.704	659.606	492.842	560.652	602.473	962.797	699.655	531.885	561.482	405.457	-1.28394	0.185883	0.23934	-1.19082	0.41951	0.679728	-1.52894	0.0178821	0.0516162
AS-tDR-013630	-	-	chr10.trna12493-LysCTT	1	35	GCCCGGCTAGCTCAGTCGGTAGAGCATGAGACTCTTAATCTCAGGGTCGTGGGTTCGAGCCCCACGTTGGGCGCCA	76	)))))))..))))........((((.))))).......(((((.....))))).......((((((((((((.	GCCCGGCTAGCTCAGTCGGTAGAGCATGAGACTCA	tiRNA-5	35	35T>A	60	81	77	105	70	157	402	332	117	64	52	55	613.817	1217.44	1063.37	1306.77	425.913	967.279	1625.46	1691.26	524.741	400.478	339.501	271.953	1.12092	0.718516	0.738923	-3.05965	0.0401003	0.245845	-2.72959	0.00645965	0.0275005
AS-tDR-001360	-	-	chr10.trna12493-LysCTT	1	35	GCCCGGCTAGCTCAGTCGGTAGAGCATGAGACTCTTAATCTCAGGGTCGTGGGTTCGAGCCCCACGTTGGGCGCCA	76	)))))))..))))........((((.))))).......(((((.....))))).......((((((((((((.	GCCCGGCTAGCTCAGTCGGTAGAGCATGAGACTCT	tiRNA-5	35	ExactMatch	344	411	357	570	449	889	1985	1755	541	347	327	340	3519.22	6177.39	4930.19	7093.88	2731.92	5477.14	8026.23	8940.26	2426.37	2171.34	2134.94	1681.16	1.15903	0.607992	0.638183	-2.99122	0.0244744	0.245845	-2.5808	0.00566398	0.0262757
AS-tDR-000886	-	-	chr10.trna12493-LysCTT	1	36	GCCCGGCTAGCTCAGTCGGTAGAGCATGAGACTCTTAATCTCAGGGTCGTGGGTTCGAGCCCCACGTTGGGCGCCA	76	)))))))..))))........((((.))))).......(((((.....))))).......((((((((((((.	GCCCGGCTAGCTCAGTCGGTAGAGCATGAGACTCTT	tiRNA-5	36	ExactMatch	115	153	118	226	167	384	870	837	249	137	109	98	1176.48	2299.61	1629.59	2812.66	1016.11	2365.83	3517.8	4263.82	1116.76	857.273	711.646	484.57	1.40963	0.347097	0.381028	-3.51817	0.0323639	0.245845	-2.49582	0.0214772	0.0556641
AS-tDR-011146	-	-	chr10.trna12493-LysCTT	1	51	GCCCGGCTAGCTCAGTCGGTAGAGCATGAGACTCTTAATCTCAGGGTCGTGGGTTCGAGCCCCACGTTGGGCGCCA	76	)))))))..))))........((((.))))).......(((((.....))))).......((((((((((((.	GCCCGGCTAGCTCAGTCGGTAGAGCATGAGACTCTTAATCTCAGGGTCGTG	tRF-5	51	ExactMatch	226	188	255	328	318	194	372	336	102	157	237	127	2312.04	2825.67	3521.56	4082.09	1934.86	1195.24	1504.16	1711.64	457.467	982.423	1547.34	627.964	-2.00718	0.00879673	0.0198741	-1.75451	0.0552359	0.290644	-3.5216	0.0024676	0.0179404
AS-tDR-013631	-	-	chr10.trna12493-LysCTT	2	35	GCCCGGCTAGCTCAGTCGGTAGAGCATGAGACTCTTAATCTCAGGGTCGTGGGTTCGAGCCCCACGTTGGGCGCCA	76	)))))))..))))........((((.))))).......(((((.....))))).......((((((((((((.	CCCGGCTAGCTCAGTCGGTAGAGCATGAGACTCT	tiRNA-5	34	ExactMatch	54	56	30	90	0	80	409	69	71	38	0	26	552.435	841.688	414.302	1120.09	0	492.881	1653.77	351.497	318.433	237.784	0	128.559	-1.172	0.792554	0.810506	-3.63274	0.26054	0.570536	-4.25757	0.017029	0.0515523
AS-tDR-003992	-	-	chr10.trna12493-LysCTT	3	35	GCCCGGCTAGCTCAGTCGGTAGAGCATGAGACTCTTAATCTCAGGGTCGTGGGTTCGAGCCCCACGTTGGGCGCCA	76	)))))))..))))........((((.))))).......(((((.....))))).......((((((((((((.	CCGGCTAGCTCAGTCGGTAGAGCATGAGACTCT	i-tRF	33	ExactMatch	174	240	143	303	76	217	1497	210	231	110	102	109	1780.07	3607.23	1974.84	3770.95	462.419	1336.94	6053.03	1069.77	1036.03	688.322	665.944	538.961	-1.24769	0.704727	0.728843	-3.04309	0.290134	0.596906	-3.79684	0.00871128	0.0330812
AS-tDR-010789	-	-	chr10.trna12493-LysCTT	13	28	GCCCGGCTAGCTCAGTCGGTAGAGCATGAGACTCTTAATCTCAGGGTCGTGGGTTCGAGCCCCACGTTGGGCGCCA	76	)))))))..))))........((((.))))).......(((((.....))))).......((((((((((((.	CAGTCGGTAGAGCATT	i-tRF	16	16G>T	121	89	110	57	34	76	115	34	114	128	100	66	1237.86	1337.68	1519.11	709.388	206.872	468.237	464.996	173.202	511.286	800.956	652.886	326.343	-3.6499	0.003861	0.0128244	1.74255	0.107069	0.392337	-2.09458	0.0205442	0.0544028
AS-tDR-003930	-	-	chr10.trna12493-LysCTT	14	32	GCCCGGCTAGCTCAGTCGGTAGAGCATGAGACTCTTAATCTCAGGGTCGTGGGTTCGAGCCCCACGTTGGGCGCCA	76	)))))))..))))........((((.))))).......(((((.....))))).......((((((((((((.	AGTCGGTAGAGCATGAGAC	i-tRF	19	ExactMatch	89	86	83	63	37	94	114	94	172	106	184	143	910.495	1292.59	1146.23	784.06	225.125	579.135	460.952	478.852	771.415	663.292	1201.31	707.077	-2.36684	0.00473886	0.0130917	1.91474	0.0327932	0.245845	-1.23611	0.285778	0.354148
AS-tDR-004117	-	-	chr10.trna12493-LysCTT	16	31	GCCCGGCTAGCTCAGTCGGTAGAGCATGAGACTCTTAATCTCAGGGTCGTGGGTTCGAGCCCCACGTTGGGCGCCA	76	)))))))..))))........((((.))))).......(((((.....))))).......((((((((((((.	TCGGTAGAGCATGAGA	i-tRF	16	ExactMatch	111	99	80	62	45	77	127	31	141	139	143	121	1135.56	1487.98	1104.8	771.615	273.801	474.398	513.517	157.919	632.381	869.788	933.628	598.296	-3.16371	0.00384386	0.0128244	2.13404	0.0145568	0.245845	-1.4825	0.0729155	0.122825
AS-tDR-004118	-	-	chr10.trna12493-LysCTT	16	32	GCCCGGCTAGCTCAGTCGGTAGAGCATGAGACTCTTAATCTCAGGGTCGTGGGTTCGAGCCCCACGTTGGGCGCCA	76	)))))))..))))........((((.))))).......(((((.....))))).......((((((((((((.	TCGGTAGAGCATGAGAC	i-tRF	17	ExactMatch	72	59	65	54	42	54	74	0	138	113	117	131	736.58	886.778	897.654	672.051	255.548	332.695	299.215	0	618.926	707.094	763.877	647.742	-3.58634	0.000861108	0.00530147	3.07546	0.00134716	0.0983473	-1.16611	0.127928	0.191186
AS-tDR-007534	-	-	chr10.trna13308-LysCTT	1	33	GCCCGGCTAGCTCAGTCGGTAGAGCATGAGACTCTTAATCTCAGGGTCGTGGGTTCGAGCCCCACGTTGGGCGCCA	76	)))))))..))))........((((.))))).......(((((.....))))).......((((((((((((.	GCCCGGCTAGCTCAGTCGGTAGAGCATGAGACA	tiRNA-5	33	33T>A	99	61	59	79	70	71	106	112	195	114	123	124	1012.8	916.838	814.793	983.186	425.913	437.432	428.605	570.547	874.569	713.352	803.05	613.13	-1.99926	0.000165713	0.00200004	1.61163	0.00515907	0.131019	-1.24052	0.0449082	0.0873126
AS-tDR-001358	-	-	chr10.trna13308-LysCTT	1	33	GCCCGGCTAGCTCAGTCGGTAGAGCATGAGACTCTTAATCTCAGGGTCGTGGGTTCGAGCCCCACGTTGGGCGCCA	76	)))))))..))))........((((.))))).......(((((.....))))).......((((((((((((.	GCCCGGCTAGCTCAGTCGGTAGAGCATGAGACT	tiRNA-5	33	ExactMatch	553	437	435	468	457	451	608	725	1144	662	806	1014	5657.35	6568.17	6007.37	5824.45	2780.6	2778.62	2458.41	3693.27	5130.8	4142.45	5262.26	5013.82	-2.05391	8.7218e-05	0.00124332	1.6691	0.00177493	0.0983473	-1.23055	0.0127558	0.0436369
AS-tDR-001359	-	-	chr10.trna13308-LysCTT	1	34	GCCCGGCTAGCTCAGTCGGTAGAGCATGAGACTCTTAATCTCAGGGTCGTGGGTTCGAGCCCCACGTTGGGCGCCA	76	)))))))..))))........((((.))))).......(((((.....))))).......((((((((((((.	GCCCGGCTAGCTCAGTCGGTAGAGCATGAGACTC	tiRNA-5	34	ExactMatch	89	55	70	53	81	91	149	189	156	85	86	82	910.495	826.657	966.704	659.606	492.842	560.652	602.473	962.797	699.655	531.885	561.482	405.457	-1.28394	0.185883	0.23934	-1.19082	0.41951	0.679728	-1.52894	0.0178821	0.0516162
AS-tDR-013630	-	-	chr10.trna13308-LysCTT	1	35	GCCCGGCTAGCTCAGTCGGTAGAGCATGAGACTCTTAATCTCAGGGTCGTGGGTTCGAGCCCCACGTTGGGCGCCA	76	)))))))..))))........((((.))))).......(((((.....))))).......((((((((((((.	GCCCGGCTAGCTCAGTCGGTAGAGCATGAGACTCA	tiRNA-5	35	35T>A	60	81	77	105	70	157	402	332	117	64	52	55	613.817	1217.44	1063.37	1306.77	425.913	967.279	1625.46	1691.26	524.741	400.478	339.501	271.953	1.12092	0.718516	0.738923	-3.05965	0.0401003	0.245845	-2.72959	0.00645965	0.0275005
AS-tDR-001360	-	-	chr10.trna13308-LysCTT	1	35	GCCCGGCTAGCTCAGTCGGTAGAGCATGAGACTCTTAATCTCAGGGTCGTGGGTTCGAGCCCCACGTTGGGCGCCA	76	)))))))..))))........((((.))))).......(((((.....))))).......((((((((((((.	GCCCGGCTAGCTCAGTCGGTAGAGCATGAGACTCT	tiRNA-5	35	ExactMatch	344	411	357	570	449	889	1985	1755	541	347	327	340	3519.22	6177.39	4930.19	7093.88	2731.92	5477.14	8026.23	8940.26	2426.37	2171.34	2134.94	1681.16	1.15903	0.607992	0.638183	-2.99122	0.0244744	0.245845	-2.5808	0.00566398	0.0262757
AS-tDR-000886	-	-	chr10.trna13308-LysCTT	1	36	GCCCGGCTAGCTCAGTCGGTAGAGCATGAGACTCTTAATCTCAGGGTCGTGGGTTCGAGCCCCACGTTGGGCGCCA	76	)))))))..))))........((((.))))).......(((((.....))))).......((((((((((((.	GCCCGGCTAGCTCAGTCGGTAGAGCATGAGACTCTT	tiRNA-5	36	ExactMatch	115	153	118	226	167	384	870	837	249	137	109	98	1176.48	2299.61	1629.59	2812.66	1016.11	2365.83	3517.8	4263.82	1116.76	857.273	711.646	484.57	1.40963	0.347097	0.381028	-3.51817	0.0323639	0.245845	-2.49582	0.0214772	0.0556641
AS-tDR-011146	-	-	chr10.trna13308-LysCTT	1	51	GCCCGGCTAGCTCAGTCGGTAGAGCATGAGACTCTTAATCTCAGGGTCGTGGGTTCGAGCCCCACGTTGGGCGCCA	76	)))))))..))))........((((.))))).......(((((.....))))).......((((((((((((.	GCCCGGCTAGCTCAGTCGGTAGAGCATGAGACTCTTAATCTCAGGGTCGTG	tRF-5	51	ExactMatch	226	188	255	328	318	194	372	336	102	157	237	127	2312.04	2825.67	3521.56	4082.09	1934.86	1195.24	1504.16	1711.64	457.467	982.423	1547.34	627.964	-2.00718	0.00879673	0.0198741	-1.75451	0.0552359	0.290644	-3.5216	0.0024676	0.0179404
AS-tDR-013631	-	-	chr10.trna13308-LysCTT	2	35	GCCCGGCTAGCTCAGTCGGTAGAGCATGAGACTCTTAATCTCAGGGTCGTGGGTTCGAGCCCCACGTTGGGCGCCA	76	)))))))..))))........((((.))))).......(((((.....))))).......((((((((((((.	CCCGGCTAGCTCAGTCGGTAGAGCATGAGACTCT	tiRNA-5	34	ExactMatch	54	56	30	90	0	80	409	69	71	38	0	26	552.435	841.688	414.302	1120.09	0	492.881	1653.77	351.497	318.433	237.784	0	128.559	-1.172	0.792554	0.810506	-3.63274	0.26054	0.570536	-4.25757	0.017029	0.0515523
AS-tDR-003992	-	-	chr10.trna13308-LysCTT	3	35	GCCCGGCTAGCTCAGTCGGTAGAGCATGAGACTCTTAATCTCAGGGTCGTGGGTTCGAGCCCCACGTTGGGCGCCA	76	)))))))..))))........((((.))))).......(((((.....))))).......((((((((((((.	CCGGCTAGCTCAGTCGGTAGAGCATGAGACTCT	i-tRF	33	ExactMatch	174	240	143	303	76	217	1497	210	231	110	102	109	1780.07	3607.23	1974.84	3770.95	462.419	1336.94	6053.03	1069.77	1036.03	688.322	665.944	538.961	-1.24769	0.704727	0.728843	-3.04309	0.290134	0.596906	-3.79684	0.00871128	0.0330812
AS-tDR-010789	-	-	chr10.trna13308-LysCTT	13	28	GCCCGGCTAGCTCAGTCGGTAGAGCATGAGACTCTTAATCTCAGGGTCGTGGGTTCGAGCCCCACGTTGGGCGCCA	76	)))))))..))))........((((.))))).......(((((.....))))).......((((((((((((.	CAGTCGGTAGAGCATT	i-tRF	16	16G>T	121	89	110	57	34	76	115	34	114	128	100	66	1237.86	1337.68	1519.11	709.388	206.872	468.237	464.996	173.202	511.286	800.956	652.886	326.343	-3.6499	0.003861	0.0128244	1.74255	0.107069	0.392337	-2.09458	0.0205442	0.0544028
AS-tDR-003930	-	-	chr10.trna13308-LysCTT	14	32	GCCCGGCTAGCTCAGTCGGTAGAGCATGAGACTCTTAATCTCAGGGTCGTGGGTTCGAGCCCCACGTTGGGCGCCA	76	)))))))..))))........((((.))))).......(((((.....))))).......((((((((((((.	AGTCGGTAGAGCATGAGAC	i-tRF	19	ExactMatch	89	86	83	63	37	94	114	94	172	106	184	143	910.495	1292.59	1146.23	784.06	225.125	579.135	460.952	478.852	771.415	663.292	1201.31	707.077	-2.36684	0.00473886	0.0130917	1.91474	0.0327932	0.245845	-1.23611	0.285778	0.354148
AS-tDR-004117	-	-	chr10.trna13308-LysCTT	16	31	GCCCGGCTAGCTCAGTCGGTAGAGCATGAGACTCTTAATCTCAGGGTCGTGGGTTCGAGCCCCACGTTGGGCGCCA	76	)))))))..))))........((((.))))).......(((((.....))))).......((((((((((((.	TCGGTAGAGCATGAGA	i-tRF	16	ExactMatch	111	99	80	62	45	77	127	31	141	139	143	121	1135.56	1487.98	1104.8	771.615	273.801	474.398	513.517	157.919	632.381	869.788	933.628	598.296	-3.16371	0.00384386	0.0128244	2.13404	0.0145568	0.245845	-1.4825	0.0729155	0.122825
AS-tDR-004118	-	-	chr10.trna13308-LysCTT	16	32	GCCCGGCTAGCTCAGTCGGTAGAGCATGAGACTCTTAATCTCAGGGTCGTGGGTTCGAGCCCCACGTTGGGCGCCA	76	)))))))..))))........((((.))))).......(((((.....))))).......((((((((((((.	TCGGTAGAGCATGAGAC	i-tRF	17	ExactMatch	72	59	65	54	42	54	74	0	138	113	117	131	736.58	886.778	897.654	672.051	255.548	332.695	299.215	0	618.926	707.094	763.877	647.742	-3.58634	0.000861108	0.00530147	3.07546	0.00134716	0.0983473	-1.16611	0.127928	0.191186
AS-tDR-007534	-	-	chr10.trna13312-LysCTT	1	33	GCCCGGCTAGCTCAGTCGGTAGAGCATGAGACTCTTAATCTCAGGGTCGTGGGTTCGAGCCCCACGTTGGGCGCCA	76	)))))))..))))........((((.))))).......(((((.....))))).......((((((((((((.	GCCCGGCTAGCTCAGTCGGTAGAGCATGAGACA	tiRNA-5	33	33T>A	99	61	59	79	70	71	106	112	195	114	123	124	1012.8	916.838	814.793	983.186	425.913	437.432	428.605	570.547	874.569	713.352	803.05	613.13	-1.99926	0.000165713	0.00200004	1.61163	0.00515907	0.131019	-1.24052	0.0449082	0.0873126
AS-tDR-001358	-	-	chr10.trna13312-LysCTT	1	33	GCCCGGCTAGCTCAGTCGGTAGAGCATGAGACTCTTAATCTCAGGGTCGTGGGTTCGAGCCCCACGTTGGGCGCCA	76	)))))))..))))........((((.))))).......(((((.....))))).......((((((((((((.	GCCCGGCTAGCTCAGTCGGTAGAGCATGAGACT	tiRNA-5	33	ExactMatch	553	437	435	468	457	451	608	725	1144	662	806	1014	5657.35	6568.17	6007.37	5824.45	2780.6	2778.62	2458.41	3693.27	5130.8	4142.45	5262.26	5013.82	-2.05391	8.7218e-05	0.00124332	1.6691	0.00177493	0.0983473	-1.23055	0.0127558	0.0436369
AS-tDR-001359	-	-	chr10.trna13312-LysCTT	1	34	GCCCGGCTAGCTCAGTCGGTAGAGCATGAGACTCTTAATCTCAGGGTCGTGGGTTCGAGCCCCACGTTGGGCGCCA	76	)))))))..))))........((((.))))).......(((((.....))))).......((((((((((((.	GCCCGGCTAGCTCAGTCGGTAGAGCATGAGACTC	tiRNA-5	34	ExactMatch	89	55	70	53	81	91	149	189	156	85	86	82	910.495	826.657	966.704	659.606	492.842	560.652	602.473	962.797	699.655	531.885	561.482	405.457	-1.28394	0.185883	0.23934	-1.19082	0.41951	0.679728	-1.52894	0.0178821	0.0516162
AS-tDR-013630	-	-	chr10.trna13312-LysCTT	1	35	GCCCGGCTAGCTCAGTCGGTAGAGCATGAGACTCTTAATCTCAGGGTCGTGGGTTCGAGCCCCACGTTGGGCGCCA	76	)))))))..))))........((((.))))).......(((((.....))))).......((((((((((((.	GCCCGGCTAGCTCAGTCGGTAGAGCATGAGACTCA	tiRNA-5	35	35T>A	60	81	77	105	70	157	402	332	117	64	52	55	613.817	1217.44	1063.37	1306.77	425.913	967.279	1625.46	1691.26	524.741	400.478	339.501	271.953	1.12092	0.718516	0.738923	-3.05965	0.0401003	0.245845	-2.72959	0.00645965	0.0275005
AS-tDR-001360	-	-	chr10.trna13312-LysCTT	1	35	GCCCGGCTAGCTCAGTCGGTAGAGCATGAGACTCTTAATCTCAGGGTCGTGGGTTCGAGCCCCACGTTGGGCGCCA	76	)))))))..))))........((((.))))).......(((((.....))))).......((((((((((((.	GCCCGGCTAGCTCAGTCGGTAGAGCATGAGACTCT	tiRNA-5	35	ExactMatch	344	411	357	570	449	889	1985	1755	541	347	327	340	3519.22	6177.39	4930.19	7093.88	2731.92	5477.14	8026.23	8940.26	2426.37	2171.34	2134.94	1681.16	1.15903	0.607992	0.638183	-2.99122	0.0244744	0.245845	-2.5808	0.00566398	0.0262757
AS-tDR-000886	-	-	chr10.trna13312-LysCTT	1	36	GCCCGGCTAGCTCAGTCGGTAGAGCATGAGACTCTTAATCTCAGGGTCGTGGGTTCGAGCCCCACGTTGGGCGCCA	76	)))))))..))))........((((.))))).......(((((.....))))).......((((((((((((.	GCCCGGCTAGCTCAGTCGGTAGAGCATGAGACTCTT	tiRNA-5	36	ExactMatch	115	153	118	226	167	384	870	837	249	137	109	98	1176.48	2299.61	1629.59	2812.66	1016.11	2365.83	3517.8	4263.82	1116.76	857.273	711.646	484.57	1.40963	0.347097	0.381028	-3.51817	0.0323639	0.245845	-2.49582	0.0214772	0.0556641
AS-tDR-011146	-	-	chr10.trna13312-LysCTT	1	51	GCCCGGCTAGCTCAGTCGGTAGAGCATGAGACTCTTAATCTCAGGGTCGTGGGTTCGAGCCCCACGTTGGGCGCCA	76	)))))))..))))........((((.))))).......(((((.....))))).......((((((((((((.	GCCCGGCTAGCTCAGTCGGTAGAGCATGAGACTCTTAATCTCAGGGTCGTG	tRF-5	51	ExactMatch	226	188	255	328	318	194	372	336	102	157	237	127	2312.04	2825.67	3521.56	4082.09	1934.86	1195.24	1504.16	1711.64	457.467	982.423	1547.34	627.964	-2.00718	0.00879673	0.0198741	-1.75451	0.0552359	0.290644	-3.5216	0.0024676	0.0179404
AS-tDR-013631	-	-	chr10.trna13312-LysCTT	2	35	GCCCGGCTAGCTCAGTCGGTAGAGCATGAGACTCTTAATCTCAGGGTCGTGGGTTCGAGCCCCACGTTGGGCGCCA	76	)))))))..))))........((((.))))).......(((((.....))))).......((((((((((((.	CCCGGCTAGCTCAGTCGGTAGAGCATGAGACTCT	tiRNA-5	34	ExactMatch	54	56	30	90	0	80	409	69	71	38	0	26	552.435	841.688	414.302	1120.09	0	492.881	1653.77	351.497	318.433	237.784	0	128.559	-1.172	0.792554	0.810506	-3.63274	0.26054	0.570536	-4.25757	0.017029	0.0515523
AS-tDR-003992	-	-	chr10.trna13312-LysCTT	3	35	GCCCGGCTAGCTCAGTCGGTAGAGCATGAGACTCTTAATCTCAGGGTCGTGGGTTCGAGCCCCACGTTGGGCGCCA	76	)))))))..))))........((((.))))).......(((((.....))))).......((((((((((((.	CCGGCTAGCTCAGTCGGTAGAGCATGAGACTCT	i-tRF	33	ExactMatch	174	240	143	303	76	217	1497	210	231	110	102	109	1780.07	3607.23	1974.84	3770.95	462.419	1336.94	6053.03	1069.77	1036.03	688.322	665.944	538.961	-1.24769	0.704727	0.728843	-3.04309	0.290134	0.596906	-3.79684	0.00871128	0.0330812
AS-tDR-010789	-	-	chr10.trna13312-LysCTT	13	28	GCCCGGCTAGCTCAGTCGGTAGAGCATGAGACTCTTAATCTCAGGGTCGTGGGTTCGAGCCCCACGTTGGGCGCCA	76	)))))))..))))........((((.))))).......(((((.....))))).......((((((((((((.	CAGTCGGTAGAGCATT	i-tRF	16	16G>T	121	89	110	57	34	76	115	34	114	128	100	66	1237.86	1337.68	1519.11	709.388	206.872	468.237	464.996	173.202	511.286	800.956	652.886	326.343	-3.6499	0.003861	0.0128244	1.74255	0.107069	0.392337	-2.09458	0.0205442	0.0544028
AS-tDR-003930	-	-	chr10.trna13312-LysCTT	14	32	GCCCGGCTAGCTCAGTCGGTAGAGCATGAGACTCTTAATCTCAGGGTCGTGGGTTCGAGCCCCACGTTGGGCGCCA	76	)))))))..))))........((((.))))).......(((((.....))))).......((((((((((((.	AGTCGGTAGAGCATGAGAC	i-tRF	19	ExactMatch	89	86	83	63	37	94	114	94	172	106	184	143	910.495	1292.59	1146.23	784.06	225.125	579.135	460.952	478.852	771.415	663.292	1201.31	707.077	-2.36684	0.00473886	0.0130917	1.91474	0.0327932	0.245845	-1.23611	0.285778	0.354148
AS-tDR-004117	-	-	chr10.trna13312-LysCTT	16	31	GCCCGGCTAGCTCAGTCGGTAGAGCATGAGACTCTTAATCTCAGGGTCGTGGGTTCGAGCCCCACGTTGGGCGCCA	76	)))))))..))))........((((.))))).......(((((.....))))).......((((((((((((.	TCGGTAGAGCATGAGA	i-tRF	16	ExactMatch	111	99	80	62	45	77	127	31	141	139	143	121	1135.56	1487.98	1104.8	771.615	273.801	474.398	513.517	157.919	632.381	869.788	933.628	598.296	-3.16371	0.00384386	0.0128244	2.13404	0.0145568	0.245845	-1.4825	0.0729155	0.122825
AS-tDR-004118	-	-	chr10.trna13312-LysCTT	16	32	GCCCGGCTAGCTCAGTCGGTAGAGCATGAGACTCTTAATCTCAGGGTCGTGGGTTCGAGCCCCACGTTGGGCGCCA	76	)))))))..))))........((((.))))).......(((((.....))))).......((((((((((((.	TCGGTAGAGCATGAGAC	i-tRF	17	ExactMatch	72	59	65	54	42	54	74	0	138	113	117	131	736.58	886.778	897.654	672.051	255.548	332.695	299.215	0	618.926	707.094	763.877	647.742	-3.58634	0.000861108	0.00530147	3.07546	0.00134716	0.0983473	-1.16611	0.127928	0.191186
AS-tDR-007534	-	-	chr10.trna13313-LysCTT	1	33	GCCCGGCTAGCTCAGTCGGTAGAGCATGAGACTCTTAATCTCAGGGTCGTGGGTTCGAGCCCCACGTTGGGCGCCA	76	)))))))..))))........((((.))))).......(((((.....))))).......((((((((((((.	GCCCGGCTAGCTCAGTCGGTAGAGCATGAGACA	tiRNA-5	33	33T>A	99	61	59	79	70	71	106	112	195	114	123	124	1012.8	916.838	814.793	983.186	425.913	437.432	428.605	570.547	874.569	713.352	803.05	613.13	-1.99926	0.000165713	0.00200004	1.61163	0.00515907	0.131019	-1.24052	0.0449082	0.0873126
AS-tDR-001358	-	-	chr10.trna13313-LysCTT	1	33	GCCCGGCTAGCTCAGTCGGTAGAGCATGAGACTCTTAATCTCAGGGTCGTGGGTTCGAGCCCCACGTTGGGCGCCA	76	)))))))..))))........((((.))))).......(((((.....))))).......((((((((((((.	GCCCGGCTAGCTCAGTCGGTAGAGCATGAGACT	tiRNA-5	33	ExactMatch	553	437	435	468	457	451	608	725	1144	662	806	1014	5657.35	6568.17	6007.37	5824.45	2780.6	2778.62	2458.41	3693.27	5130.8	4142.45	5262.26	5013.82	-2.05391	8.7218e-05	0.00124332	1.6691	0.00177493	0.0983473	-1.23055	0.0127558	0.0436369
AS-tDR-001359	-	-	chr10.trna13313-LysCTT	1	34	GCCCGGCTAGCTCAGTCGGTAGAGCATGAGACTCTTAATCTCAGGGTCGTGGGTTCGAGCCCCACGTTGGGCGCCA	76	)))))))..))))........((((.))))).......(((((.....))))).......((((((((((((.	GCCCGGCTAGCTCAGTCGGTAGAGCATGAGACTC	tiRNA-5	34	ExactMatch	89	55	70	53	81	91	149	189	156	85	86	82	910.495	826.657	966.704	659.606	492.842	560.652	602.473	962.797	699.655	531.885	561.482	405.457	-1.28394	0.185883	0.23934	-1.19082	0.41951	0.679728	-1.52894	0.0178821	0.0516162
AS-tDR-013630	-	-	chr10.trna13313-LysCTT	1	35	GCCCGGCTAGCTCAGTCGGTAGAGCATGAGACTCTTAATCTCAGGGTCGTGGGTTCGAGCCCCACGTTGGGCGCCA	76	)))))))..))))........((((.))))).......(((((.....))))).......((((((((((((.	GCCCGGCTAGCTCAGTCGGTAGAGCATGAGACTCA	tiRNA-5	35	35T>A	60	81	77	105	70	157	402	332	117	64	52	55	613.817	1217.44	1063.37	1306.77	425.913	967.279	1625.46	1691.26	524.741	400.478	339.501	271.953	1.12092	0.718516	0.738923	-3.05965	0.0401003	0.245845	-2.72959	0.00645965	0.0275005
AS-tDR-001360	-	-	chr10.trna13313-LysCTT	1	35	GCCCGGCTAGCTCAGTCGGTAGAGCATGAGACTCTTAATCTCAGGGTCGTGGGTTCGAGCCCCACGTTGGGCGCCA	76	)))))))..))))........((((.))))).......(((((.....))))).......((((((((((((.	GCCCGGCTAGCTCAGTCGGTAGAGCATGAGACTCT	tiRNA-5	35	ExactMatch	344	411	357	570	449	889	1985	1755	541	347	327	340	3519.22	6177.39	4930.19	7093.88	2731.92	5477.14	8026.23	8940.26	2426.37	2171.34	2134.94	1681.16	1.15903	0.607992	0.638183	-2.99122	0.0244744	0.245845	-2.5808	0.00566398	0.0262757
AS-tDR-000886	-	-	chr10.trna13313-LysCTT	1	36	GCCCGGCTAGCTCAGTCGGTAGAGCATGAGACTCTTAATCTCAGGGTCGTGGGTTCGAGCCCCACGTTGGGCGCCA	76	)))))))..))))........((((.))))).......(((((.....))))).......((((((((((((.	GCCCGGCTAGCTCAGTCGGTAGAGCATGAGACTCTT	tiRNA-5	36	ExactMatch	115	153	118	226	167	384	870	837	249	137	109	98	1176.48	2299.61	1629.59	2812.66	1016.11	2365.83	3517.8	4263.82	1116.76	857.273	711.646	484.57	1.40963	0.347097	0.381028	-3.51817	0.0323639	0.245845	-2.49582	0.0214772	0.0556641
AS-tDR-011146	-	-	chr10.trna13313-LysCTT	1	51	GCCCGGCTAGCTCAGTCGGTAGAGCATGAGACTCTTAATCTCAGGGTCGTGGGTTCGAGCCCCACGTTGGGCGCCA	76	)))))))..))))........((((.))))).......(((((.....))))).......((((((((((((.	GCCCGGCTAGCTCAGTCGGTAGAGCATGAGACTCTTAATCTCAGGGTCGTG	tRF-5	51	ExactMatch	226	188	255	328	318	194	372	336	102	157	237	127	2312.04	2825.67	3521.56	4082.09	1934.86	1195.24	1504.16	1711.64	457.467	982.423	1547.34	627.964	-2.00718	0.00879673	0.0198741	-1.75451	0.0552359	0.290644	-3.5216	0.0024676	0.0179404
AS-tDR-013631	-	-	chr10.trna13313-LysCTT	2	35	GCCCGGCTAGCTCAGTCGGTAGAGCATGAGACTCTTAATCTCAGGGTCGTGGGTTCGAGCCCCACGTTGGGCGCCA	76	)))))))..))))........((((.))))).......(((((.....))))).......((((((((((((.	CCCGGCTAGCTCAGTCGGTAGAGCATGAGACTCT	tiRNA-5	34	ExactMatch	54	56	30	90	0	80	409	69	71	38	0	26	552.435	841.688	414.302	1120.09	0	492.881	1653.77	351.497	318.433	237.784	0	128.559	-1.172	0.792554	0.810506	-3.63274	0.26054	0.570536	-4.25757	0.017029	0.0515523
AS-tDR-003992	-	-	chr10.trna13313-LysCTT	3	35	GCCCGGCTAGCTCAGTCGGTAGAGCATGAGACTCTTAATCTCAGGGTCGTGGGTTCGAGCCCCACGTTGGGCGCCA	76	)))))))..))))........((((.))))).......(((((.....))))).......((((((((((((.	CCGGCTAGCTCAGTCGGTAGAGCATGAGACTCT	i-tRF	33	ExactMatch	174	240	143	303	76	217	1497	210	231	110	102	109	1780.07	3607.23	1974.84	3770.95	462.419	1336.94	6053.03	1069.77	1036.03	688.322	665.944	538.961	-1.24769	0.704727	0.728843	-3.04309	0.290134	0.596906	-3.79684	0.00871128	0.0330812
AS-tDR-010789	-	-	chr10.trna13313-LysCTT	13	28	GCCCGGCTAGCTCAGTCGGTAGAGCATGAGACTCTTAATCTCAGGGTCGTGGGTTCGAGCCCCACGTTGGGCGCCA	76	)))))))..))))........((((.))))).......(((((.....))))).......((((((((((((.	CAGTCGGTAGAGCATT	i-tRF	16	16G>T	121	89	110	57	34	76	115	34	114	128	100	66	1237.86	1337.68	1519.11	709.388	206.872	468.237	464.996	173.202	511.286	800.956	652.886	326.343	-3.6499	0.003861	0.0128244	1.74255	0.107069	0.392337	-2.09458	0.0205442	0.0544028
AS-tDR-003930	-	-	chr10.trna13313-LysCTT	14	32	GCCCGGCTAGCTCAGTCGGTAGAGCATGAGACTCTTAATCTCAGGGTCGTGGGTTCGAGCCCCACGTTGGGCGCCA	76	)))))))..))))........((((.))))).......(((((.....))))).......((((((((((((.	AGTCGGTAGAGCATGAGAC	i-tRF	19	ExactMatch	89	86	83	63	37	94	114	94	172	106	184	143	910.495	1292.59	1146.23	784.06	225.125	579.135	460.952	478.852	771.415	663.292	1201.31	707.077	-2.36684	0.00473886	0.0130917	1.91474	0.0327932	0.245845	-1.23611	0.285778	0.354148
AS-tDR-004117	-	-	chr10.trna13313-LysCTT	16	31	GCCCGGCTAGCTCAGTCGGTAGAGCATGAGACTCTTAATCTCAGGGTCGTGGGTTCGAGCCCCACGTTGGGCGCCA	76	)))))))..))))........((((.))))).......(((((.....))))).......((((((((((((.	TCGGTAGAGCATGAGA	i-tRF	16	ExactMatch	111	99	80	62	45	77	127	31	141	139	143	121	1135.56	1487.98	1104.8	771.615	273.801	474.398	513.517	157.919	632.381	869.788	933.628	598.296	-3.16371	0.00384386	0.0128244	2.13404	0.0145568	0.245845	-1.4825	0.0729155	0.122825
AS-tDR-004118	-	-	chr10.trna13313-LysCTT	16	32	GCCCGGCTAGCTCAGTCGGTAGAGCATGAGACTCTTAATCTCAGGGTCGTGGGTTCGAGCCCCACGTTGGGCGCCA	76	)))))))..))))........((((.))))).......(((((.....))))).......((((((((((((.	TCGGTAGAGCATGAGAC	i-tRF	17	ExactMatch	72	59	65	54	42	54	74	0	138	113	117	131	736.58	886.778	897.654	672.051	255.548	332.695	299.215	0	618.926	707.094	763.877	647.742	-3.58634	0.000861108	0.00530147	3.07546	0.00134716	0.0983473	-1.16611	0.127928	0.191186
AS-tDR-007534	-	-	chr10.trna465-LysCTT	1	33	GCCCGGCTAGCTCAGTCGGTAGAGCATGAGACTCTTAATCTCAGGGTCGTGGGTTCGAGCCCCACGTTGGGCGCCA	76	)))))))..))))........((((.))))).......(((((.....))))).......((((((((((((.	GCCCGGCTAGCTCAGTCGGTAGAGCATGAGACA	tiRNA-5	33	33T>A	99	61	59	79	70	71	106	112	195	114	123	124	1012.8	916.838	814.793	983.186	425.913	437.432	428.605	570.547	874.569	713.352	803.05	613.13	-1.99926	0.000165713	0.00200004	1.61163	0.00515907	0.131019	-1.24052	0.0449082	0.0873126
AS-tDR-001358	-	-	chr10.trna465-LysCTT	1	33	GCCCGGCTAGCTCAGTCGGTAGAGCATGAGACTCTTAATCTCAGGGTCGTGGGTTCGAGCCCCACGTTGGGCGCCA	76	)))))))..))))........((((.))))).......(((((.....))))).......((((((((((((.	GCCCGGCTAGCTCAGTCGGTAGAGCATGAGACT	tiRNA-5	33	ExactMatch	553	437	435	468	457	451	608	725	1144	662	806	1014	5657.35	6568.17	6007.37	5824.45	2780.6	2778.62	2458.41	3693.27	5130.8	4142.45	5262.26	5013.82	-2.05391	8.7218e-05	0.00124332	1.6691	0.00177493	0.0983473	-1.23055	0.0127558	0.0436369
AS-tDR-001359	-	-	chr10.trna465-LysCTT	1	34	GCCCGGCTAGCTCAGTCGGTAGAGCATGAGACTCTTAATCTCAGGGTCGTGGGTTCGAGCCCCACGTTGGGCGCCA	76	)))))))..))))........((((.))))).......(((((.....))))).......((((((((((((.	GCCCGGCTAGCTCAGTCGGTAGAGCATGAGACTC	tiRNA-5	34	ExactMatch	89	55	70	53	81	91	149	189	156	85	86	82	910.495	826.657	966.704	659.606	492.842	560.652	602.473	962.797	699.655	531.885	561.482	405.457	-1.28394	0.185883	0.23934	-1.19082	0.41951	0.679728	-1.52894	0.0178821	0.0516162
AS-tDR-013630	-	-	chr10.trna465-LysCTT	1	35	GCCCGGCTAGCTCAGTCGGTAGAGCATGAGACTCTTAATCTCAGGGTCGTGGGTTCGAGCCCCACGTTGGGCGCCA	76	)))))))..))))........((((.))))).......(((((.....))))).......((((((((((((.	GCCCGGCTAGCTCAGTCGGTAGAGCATGAGACTCA	tiRNA-5	35	35T>A	60	81	77	105	70	157	402	332	117	64	52	55	613.817	1217.44	1063.37	1306.77	425.913	967.279	1625.46	1691.26	524.741	400.478	339.501	271.953	1.12092	0.718516	0.738923	-3.05965	0.0401003	0.245845	-2.72959	0.00645965	0.0275005
AS-tDR-001360	-	-	chr10.trna465-LysCTT	1	35	GCCCGGCTAGCTCAGTCGGTAGAGCATGAGACTCTTAATCTCAGGGTCGTGGGTTCGAGCCCCACGTTGGGCGCCA	76	)))))))..))))........((((.))))).......(((((.....))))).......((((((((((((.	GCCCGGCTAGCTCAGTCGGTAGAGCATGAGACTCT	tiRNA-5	35	ExactMatch	344	411	357	570	449	889	1985	1755	541	347	327	340	3519.22	6177.39	4930.19	7093.88	2731.92	5477.14	8026.23	8940.26	2426.37	2171.34	2134.94	1681.16	1.15903	0.607992	0.638183	-2.99122	0.0244744	0.245845	-2.5808	0.00566398	0.0262757
AS-tDR-000886	-	-	chr10.trna465-LysCTT	1	36	GCCCGGCTAGCTCAGTCGGTAGAGCATGAGACTCTTAATCTCAGGGTCGTGGGTTCGAGCCCCACGTTGGGCGCCA	76	)))))))..))))........((((.))))).......(((((.....))))).......((((((((((((.	GCCCGGCTAGCTCAGTCGGTAGAGCATGAGACTCTT	tiRNA-5	36	ExactMatch	115	153	118	226	167	384	870	837	249	137	109	98	1176.48	2299.61	1629.59	2812.66	1016.11	2365.83	3517.8	4263.82	1116.76	857.273	711.646	484.57	1.40963	0.347097	0.381028	-3.51817	0.0323639	0.245845	-2.49582	0.0214772	0.0556641
AS-tDR-011146	-	-	chr10.trna465-LysCTT	1	51	GCCCGGCTAGCTCAGTCGGTAGAGCATGAGACTCTTAATCTCAGGGTCGTGGGTTCGAGCCCCACGTTGGGCGCCA	76	)))))))..))))........((((.))))).......(((((.....))))).......((((((((((((.	GCCCGGCTAGCTCAGTCGGTAGAGCATGAGACTCTTAATCTCAGGGTCGTG	tRF-5	51	ExactMatch	226	188	255	328	318	194	372	336	102	157	237	127	2312.04	2825.67	3521.56	4082.09	1934.86	1195.24	1504.16	1711.64	457.467	982.423	1547.34	627.964	-2.00718	0.00879673	0.0198741	-1.75451	0.0552359	0.290644	-3.5216	0.0024676	0.0179404
AS-tDR-013631	-	-	chr10.trna465-LysCTT	2	35	GCCCGGCTAGCTCAGTCGGTAGAGCATGAGACTCTTAATCTCAGGGTCGTGGGTTCGAGCCCCACGTTGGGCGCCA	76	)))))))..))))........((((.))))).......(((((.....))))).......((((((((((((.	CCCGGCTAGCTCAGTCGGTAGAGCATGAGACTCT	tiRNA-5	34	ExactMatch	54	56	30	90	0	80	409	69	71	38	0	26	552.435	841.688	414.302	1120.09	0	492.881	1653.77	351.497	318.433	237.784	0	128.559	-1.172	0.792554	0.810506	-3.63274	0.26054	0.570536	-4.25757	0.017029	0.0515523
AS-tDR-003992	-	-	chr10.trna465-LysCTT	3	35	GCCCGGCTAGCTCAGTCGGTAGAGCATGAGACTCTTAATCTCAGGGTCGTGGGTTCGAGCCCCACGTTGGGCGCCA	76	)))))))..))))........((((.))))).......(((((.....))))).......((((((((((((.	CCGGCTAGCTCAGTCGGTAGAGCATGAGACTCT	i-tRF	33	ExactMatch	174	240	143	303	76	217	1497	210	231	110	102	109	1780.07	3607.23	1974.84	3770.95	462.419	1336.94	6053.03	1069.77	1036.03	688.322	665.944	538.961	-1.24769	0.704727	0.728843	-3.04309	0.290134	0.596906	-3.79684	0.00871128	0.0330812
AS-tDR-010789	-	-	chr10.trna465-LysCTT	13	28	GCCCGGCTAGCTCAGTCGGTAGAGCATGAGACTCTTAATCTCAGGGTCGTGGGTTCGAGCCCCACGTTGGGCGCCA	76	)))))))..))))........((((.))))).......(((((.....))))).......((((((((((((.	CAGTCGGTAGAGCATT	i-tRF	16	16G>T	121	89	110	57	34	76	115	34	114	128	100	66	1237.86	1337.68	1519.11	709.388	206.872	468.237	464.996	173.202	511.286	800.956	652.886	326.343	-3.6499	0.003861	0.0128244	1.74255	0.107069	0.392337	-2.09458	0.0205442	0.0544028
AS-tDR-003930	-	-	chr10.trna465-LysCTT	14	32	GCCCGGCTAGCTCAGTCGGTAGAGCATGAGACTCTTAATCTCAGGGTCGTGGGTTCGAGCCCCACGTTGGGCGCCA	76	)))))))..))))........((((.))))).......(((((.....))))).......((((((((((((.	AGTCGGTAGAGCATGAGAC	i-tRF	19	ExactMatch	89	86	83	63	37	94	114	94	172	106	184	143	910.495	1292.59	1146.23	784.06	225.125	579.135	460.952	478.852	771.415	663.292	1201.31	707.077	-2.36684	0.00473886	0.0130917	1.91474	0.0327932	0.245845	-1.23611	0.285778	0.354148
AS-tDR-004117	-	-	chr10.trna465-LysCTT	16	31	GCCCGGCTAGCTCAGTCGGTAGAGCATGAGACTCTTAATCTCAGGGTCGTGGGTTCGAGCCCCACGTTGGGCGCCA	76	)))))))..))))........((((.))))).......(((((.....))))).......((((((((((((.	TCGGTAGAGCATGAGA	i-tRF	16	ExactMatch	111	99	80	62	45	77	127	31	141	139	143	121	1135.56	1487.98	1104.8	771.615	273.801	474.398	513.517	157.919	632.381	869.788	933.628	598.296	-3.16371	0.00384386	0.0128244	2.13404	0.0145568	0.245845	-1.4825	0.0729155	0.122825
AS-tDR-004118	-	-	chr10.trna465-LysCTT	16	32	GCCCGGCTAGCTCAGTCGGTAGAGCATGAGACTCTTAATCTCAGGGTCGTGGGTTCGAGCCCCACGTTGGGCGCCA	76	)))))))..))))........((((.))))).......(((((.....))))).......((((((((((((.	TCGGTAGAGCATGAGAC	i-tRF	17	ExactMatch	72	59	65	54	42	54	74	0	138	113	117	131	736.58	886.778	897.654	672.051	255.548	332.695	299.215	0	618.926	707.094	763.877	647.742	-3.58634	0.000861108	0.00530147	3.07546	0.00134716	0.0983473	-1.16611	0.127928	0.191186
AS-tDR-007534	-	-	chr2.trna4376-LysCTT	1	33	GCCCGGCTAGCTCAGTCGGTAGAGCATGAGACTCTTAATCTCAGGGTCGTGGGTTCGAGCCCCACGTTGGGCGCCA	76	)))))))..))))........((((.))))).......(((((.....))))).......((((((((((((.	GCCCGGCTAGCTCAGTCGGTAGAGCATGAGACA	tiRNA-5	33	33T>A	99	61	59	79	70	71	106	112	195	114	123	124	1012.8	916.838	814.793	983.186	425.913	437.432	428.605	570.547	874.569	713.352	803.05	613.13	-1.99926	0.000165713	0.00200004	1.61163	0.00515907	0.131019	-1.24052	0.0449082	0.0873126
AS-tDR-001358	-	-	chr2.trna4376-LysCTT	1	33	GCCCGGCTAGCTCAGTCGGTAGAGCATGAGACTCTTAATCTCAGGGTCGTGGGTTCGAGCCCCACGTTGGGCGCCA	76	)))))))..))))........((((.))))).......(((((.....))))).......((((((((((((.	GCCCGGCTAGCTCAGTCGGTAGAGCATGAGACT	tiRNA-5	33	ExactMatch	553	437	435	468	457	451	608	725	1144	662	806	1014	5657.35	6568.17	6007.37	5824.45	2780.6	2778.62	2458.41	3693.27	5130.8	4142.45	5262.26	5013.82	-2.05391	8.7218e-05	0.00124332	1.6691	0.00177493	0.0983473	-1.23055	0.0127558	0.0436369
AS-tDR-001359	-	-	chr2.trna4376-LysCTT	1	34	GCCCGGCTAGCTCAGTCGGTAGAGCATGAGACTCTTAATCTCAGGGTCGTGGGTTCGAGCCCCACGTTGGGCGCCA	76	)))))))..))))........((((.))))).......(((((.....))))).......((((((((((((.	GCCCGGCTAGCTCAGTCGGTAGAGCATGAGACTC	tiRNA-5	34	ExactMatch	89	55	70	53	81	91	149	189	156	85	86	82	910.495	826.657	966.704	659.606	492.842	560.652	602.473	962.797	699.655	531.885	561.482	405.457	-1.28394	0.185883	0.23934	-1.19082	0.41951	0.679728	-1.52894	0.0178821	0.0516162
AS-tDR-013630	-	-	chr2.trna4376-LysCTT	1	35	GCCCGGCTAGCTCAGTCGGTAGAGCATGAGACTCTTAATCTCAGGGTCGTGGGTTCGAGCCCCACGTTGGGCGCCA	76	)))))))..))))........((((.))))).......(((((.....))))).......((((((((((((.	GCCCGGCTAGCTCAGTCGGTAGAGCATGAGACTCA	tiRNA-5	35	35T>A	60	81	77	105	70	157	402	332	117	64	52	55	613.817	1217.44	1063.37	1306.77	425.913	967.279	1625.46	1691.26	524.741	400.478	339.501	271.953	1.12092	0.718516	0.738923	-3.05965	0.0401003	0.245845	-2.72959	0.00645965	0.0275005
AS-tDR-001360	-	-	chr2.trna4376-LysCTT	1	35	GCCCGGCTAGCTCAGTCGGTAGAGCATGAGACTCTTAATCTCAGGGTCGTGGGTTCGAGCCCCACGTTGGGCGCCA	76	)))))))..))))........((((.))))).......(((((.....))))).......((((((((((((.	GCCCGGCTAGCTCAGTCGGTAGAGCATGAGACTCT	tiRNA-5	35	ExactMatch	344	411	357	570	449	889	1985	1755	541	347	327	340	3519.22	6177.39	4930.19	7093.88	2731.92	5477.14	8026.23	8940.26	2426.37	2171.34	2134.94	1681.16	1.15903	0.607992	0.638183	-2.99122	0.0244744	0.245845	-2.5808	0.00566398	0.0262757
AS-tDR-000886	-	-	chr2.trna4376-LysCTT	1	36	GCCCGGCTAGCTCAGTCGGTAGAGCATGAGACTCTTAATCTCAGGGTCGTGGGTTCGAGCCCCACGTTGGGCGCCA	76	)))))))..))))........((((.))))).......(((((.....))))).......((((((((((((.	GCCCGGCTAGCTCAGTCGGTAGAGCATGAGACTCTT	tiRNA-5	36	ExactMatch	115	153	118	226	167	384	870	837	249	137	109	98	1176.48	2299.61	1629.59	2812.66	1016.11	2365.83	3517.8	4263.82	1116.76	857.273	711.646	484.57	1.40963	0.347097	0.381028	-3.51817	0.0323639	0.245845	-2.49582	0.0214772	0.0556641
AS-tDR-011146	-	-	chr2.trna4376-LysCTT	1	51	GCCCGGCTAGCTCAGTCGGTAGAGCATGAGACTCTTAATCTCAGGGTCGTGGGTTCGAGCCCCACGTTGGGCGCCA	76	)))))))..))))........((((.))))).......(((((.....))))).......((((((((((((.	GCCCGGCTAGCTCAGTCGGTAGAGCATGAGACTCTTAATCTCAGGGTCGTG	tRF-5	51	ExactMatch	226	188	255	328	318	194	372	336	102	157	237	127	2312.04	2825.67	3521.56	4082.09	1934.86	1195.24	1504.16	1711.64	457.467	982.423	1547.34	627.964	-2.00718	0.00879673	0.0198741	-1.75451	0.0552359	0.290644	-3.5216	0.0024676	0.0179404
AS-tDR-013631	-	-	chr2.trna4376-LysCTT	2	35	GCCCGGCTAGCTCAGTCGGTAGAGCATGAGACTCTTAATCTCAGGGTCGTGGGTTCGAGCCCCACGTTGGGCGCCA	76	)))))))..))))........((((.))))).......(((((.....))))).......((((((((((((.	CCCGGCTAGCTCAGTCGGTAGAGCATGAGACTCT	tiRNA-5	34	ExactMatch	54	56	30	90	0	80	409	69	71	38	0	26	552.435	841.688	414.302	1120.09	0	492.881	1653.77	351.497	318.433	237.784	0	128.559	-1.172	0.792554	0.810506	-3.63274	0.26054	0.570536	-4.25757	0.017029	0.0515523
AS-tDR-003992	-	-	chr2.trna4376-LysCTT	3	35	GCCCGGCTAGCTCAGTCGGTAGAGCATGAGACTCTTAATCTCAGGGTCGTGGGTTCGAGCCCCACGTTGGGCGCCA	76	)))))))..))))........((((.))))).......(((((.....))))).......((((((((((((.	CCGGCTAGCTCAGTCGGTAGAGCATGAGACTCT	i-tRF	33	ExactMatch	174	240	143	303	76	217	1497	210	231	110	102	109	1780.07	3607.23	1974.84	3770.95	462.419	1336.94	6053.03	1069.77	1036.03	688.322	665.944	538.961	-1.24769	0.704727	0.728843	-3.04309	0.290134	0.596906	-3.79684	0.00871128	0.0330812
AS-tDR-010789	-	-	chr2.trna4376-LysCTT	13	28	GCCCGGCTAGCTCAGTCGGTAGAGCATGAGACTCTTAATCTCAGGGTCGTGGGTTCGAGCCCCACGTTGGGCGCCA	76	)))))))..))))........((((.))))).......(((((.....))))).......((((((((((((.	CAGTCGGTAGAGCATT	i-tRF	16	16G>T	121	89	110	57	34	76	115	34	114	128	100	66	1237.86	1337.68	1519.11	709.388	206.872	468.237	464.996	173.202	511.286	800.956	652.886	326.343	-3.6499	0.003861	0.0128244	1.74255	0.107069	0.392337	-2.09458	0.0205442	0.0544028
AS-tDR-003930	-	-	chr2.trna4376-LysCTT	14	32	GCCCGGCTAGCTCAGTCGGTAGAGCATGAGACTCTTAATCTCAGGGTCGTGGGTTCGAGCCCCACGTTGGGCGCCA	76	)))))))..))))........((((.))))).......(((((.....))))).......((((((((((((.	AGTCGGTAGAGCATGAGAC	i-tRF	19	ExactMatch	89	86	83	63	37	94	114	94	172	106	184	143	910.495	1292.59	1146.23	784.06	225.125	579.135	460.952	478.852	771.415	663.292	1201.31	707.077	-2.36684	0.00473886	0.0130917	1.91474	0.0327932	0.245845	-1.23611	0.285778	0.354148
AS-tDR-004117	-	-	chr2.trna4376-LysCTT	16	31	GCCCGGCTAGCTCAGTCGGTAGAGCATGAGACTCTTAATCTCAGGGTCGTGGGTTCGAGCCCCACGTTGGGCGCCA	76	)))))))..))))........((((.))))).......(((((.....))))).......((((((((((((.	TCGGTAGAGCATGAGA	i-tRF	16	ExactMatch	111	99	80	62	45	77	127	31	141	139	143	121	1135.56	1487.98	1104.8	771.615	273.801	474.398	513.517	157.919	632.381	869.788	933.628	598.296	-3.16371	0.00384386	0.0128244	2.13404	0.0145568	0.245845	-1.4825	0.0729155	0.122825
AS-tDR-004118	-	-	chr2.trna4376-LysCTT	16	32	GCCCGGCTAGCTCAGTCGGTAGAGCATGAGACTCTTAATCTCAGGGTCGTGGGTTCGAGCCCCACGTTGGGCGCCA	76	)))))))..))))........((((.))))).......(((((.....))))).......((((((((((((.	TCGGTAGAGCATGAGAC	i-tRF	17	ExactMatch	72	59	65	54	42	54	74	0	138	113	117	131	736.58	886.778	897.654	672.051	255.548	332.695	299.215	0	618.926	707.094	763.877	647.742	-3.58634	0.000861108	0.00530147	3.07546	0.00134716	0.0983473	-1.16611	0.127928	0.191186
AS-tDR-007534	-	-	chr2.trna7564-LysCTT	1	33	GCCCGGCTAGCTCAGTCGGTAGAGCATGAGACTCTTAATCTCAGGGTCGTGGGTTCGAGCCCCACGTTGGGCGCCA	76	)))))))..))))........((((.))))).......(((((.....))))).......((((((((((((.	GCCCGGCTAGCTCAGTCGGTAGAGCATGAGACA	tiRNA-5	33	33T>A	99	61	59	79	70	71	106	112	195	114	123	124	1012.8	916.838	814.793	983.186	425.913	437.432	428.605	570.547	874.569	713.352	803.05	613.13	-1.99926	0.000165713	0.00200004	1.61163	0.00515907	0.131019	-1.24052	0.0449082	0.0873126
AS-tDR-001358	-	-	chr2.trna7564-LysCTT	1	33	GCCCGGCTAGCTCAGTCGGTAGAGCATGAGACTCTTAATCTCAGGGTCGTGGGTTCGAGCCCCACGTTGGGCGCCA	76	)))))))..))))........((((.))))).......(((((.....))))).......((((((((((((.	GCCCGGCTAGCTCAGTCGGTAGAGCATGAGACT	tiRNA-5	33	ExactMatch	553	437	435	468	457	451	608	725	1144	662	806	1014	5657.35	6568.17	6007.37	5824.45	2780.6	2778.62	2458.41	3693.27	5130.8	4142.45	5262.26	5013.82	-2.05391	8.7218e-05	0.00124332	1.6691	0.00177493	0.0983473	-1.23055	0.0127558	0.0436369
AS-tDR-001359	-	-	chr2.trna7564-LysCTT	1	34	GCCCGGCTAGCTCAGTCGGTAGAGCATGAGACTCTTAATCTCAGGGTCGTGGGTTCGAGCCCCACGTTGGGCGCCA	76	)))))))..))))........((((.))))).......(((((.....))))).......((((((((((((.	GCCCGGCTAGCTCAGTCGGTAGAGCATGAGACTC	tiRNA-5	34	ExactMatch	89	55	70	53	81	91	149	189	156	85	86	82	910.495	826.657	966.704	659.606	492.842	560.652	602.473	962.797	699.655	531.885	561.482	405.457	-1.28394	0.185883	0.23934	-1.19082	0.41951	0.679728	-1.52894	0.0178821	0.0516162
AS-tDR-013630	-	-	chr2.trna7564-LysCTT	1	35	GCCCGGCTAGCTCAGTCGGTAGAGCATGAGACTCTTAATCTCAGGGTCGTGGGTTCGAGCCCCACGTTGGGCGCCA	76	)))))))..))))........((((.))))).......(((((.....))))).......((((((((((((.	GCCCGGCTAGCTCAGTCGGTAGAGCATGAGACTCA	tiRNA-5	35	35T>A	60	81	77	105	70	157	402	332	117	64	52	55	613.817	1217.44	1063.37	1306.77	425.913	967.279	1625.46	1691.26	524.741	400.478	339.501	271.953	1.12092	0.718516	0.738923	-3.05965	0.0401003	0.245845	-2.72959	0.00645965	0.0275005
AS-tDR-001360	-	-	chr2.trna7564-LysCTT	1	35	GCCCGGCTAGCTCAGTCGGTAGAGCATGAGACTCTTAATCTCAGGGTCGTGGGTTCGAGCCCCACGTTGGGCGCCA	76	)))))))..))))........((((.))))).......(((((.....))))).......((((((((((((.	GCCCGGCTAGCTCAGTCGGTAGAGCATGAGACTCT	tiRNA-5	35	ExactMatch	344	411	357	570	449	889	1985	1755	541	347	327	340	3519.22	6177.39	4930.19	7093.88	2731.92	5477.14	8026.23	8940.26	2426.37	2171.34	2134.94	1681.16	1.15903	0.607992	0.638183	-2.99122	0.0244744	0.245845	-2.5808	0.00566398	0.0262757
AS-tDR-000886	-	-	chr2.trna7564-LysCTT	1	36	GCCCGGCTAGCTCAGTCGGTAGAGCATGAGACTCTTAATCTCAGGGTCGTGGGTTCGAGCCCCACGTTGGGCGCCA	76	)))))))..))))........((((.))))).......(((((.....))))).......((((((((((((.	GCCCGGCTAGCTCAGTCGGTAGAGCATGAGACTCTT	tiRNA-5	36	ExactMatch	115	153	118	226	167	384	870	837	249	137	109	98	1176.48	2299.61	1629.59	2812.66	1016.11	2365.83	3517.8	4263.82	1116.76	857.273	711.646	484.57	1.40963	0.347097	0.381028	-3.51817	0.0323639	0.245845	-2.49582	0.0214772	0.0556641
AS-tDR-011146	-	-	chr2.trna7564-LysCTT	1	51	GCCCGGCTAGCTCAGTCGGTAGAGCATGAGACTCTTAATCTCAGGGTCGTGGGTTCGAGCCCCACGTTGGGCGCCA	76	)))))))..))))........((((.))))).......(((((.....))))).......((((((((((((.	GCCCGGCTAGCTCAGTCGGTAGAGCATGAGACTCTTAATCTCAGGGTCGTG	tRF-5	51	ExactMatch	226	188	255	328	318	194	372	336	102	157	237	127	2312.04	2825.67	3521.56	4082.09	1934.86	1195.24	1504.16	1711.64	457.467	982.423	1547.34	627.964	-2.00718	0.00879673	0.0198741	-1.75451	0.0552359	0.290644	-3.5216	0.0024676	0.0179404
AS-tDR-013631	-	-	chr2.trna7564-LysCTT	2	35	GCCCGGCTAGCTCAGTCGGTAGAGCATGAGACTCTTAATCTCAGGGTCGTGGGTTCGAGCCCCACGTTGGGCGCCA	76	)))))))..))))........((((.))))).......(((((.....))))).......((((((((((((.	CCCGGCTAGCTCAGTCGGTAGAGCATGAGACTCT	tiRNA-5	34	ExactMatch	54	56	30	90	0	80	409	69	71	38	0	26	552.435	841.688	414.302	1120.09	0	492.881	1653.77	351.497	318.433	237.784	0	128.559	-1.172	0.792554	0.810506	-3.63274	0.26054	0.570536	-4.25757	0.017029	0.0515523
AS-tDR-003992	-	-	chr2.trna7564-LysCTT	3	35	GCCCGGCTAGCTCAGTCGGTAGAGCATGAGACTCTTAATCTCAGGGTCGTGGGTTCGAGCCCCACGTTGGGCGCCA	76	)))))))..))))........((((.))))).......(((((.....))))).......((((((((((((.	CCGGCTAGCTCAGTCGGTAGAGCATGAGACTCT	i-tRF	33	ExactMatch	174	240	143	303	76	217	1497	210	231	110	102	109	1780.07	3607.23	1974.84	3770.95	462.419	1336.94	6053.03	1069.77	1036.03	688.322	665.944	538.961	-1.24769	0.704727	0.728843	-3.04309	0.290134	0.596906	-3.79684	0.00871128	0.0330812
AS-tDR-010789	-	-	chr2.trna7564-LysCTT	13	28	GCCCGGCTAGCTCAGTCGGTAGAGCATGAGACTCTTAATCTCAGGGTCGTGGGTTCGAGCCCCACGTTGGGCGCCA	76	)))))))..))))........((((.))))).......(((((.....))))).......((((((((((((.	CAGTCGGTAGAGCATT	i-tRF	16	16G>T	121	89	110	57	34	76	115	34	114	128	100	66	1237.86	1337.68	1519.11	709.388	206.872	468.237	464.996	173.202	511.286	800.956	652.886	326.343	-3.6499	0.003861	0.0128244	1.74255	0.107069	0.392337	-2.09458	0.0205442	0.0544028
AS-tDR-003930	-	-	chr2.trna7564-LysCTT	14	32	GCCCGGCTAGCTCAGTCGGTAGAGCATGAGACTCTTAATCTCAGGGTCGTGGGTTCGAGCCCCACGTTGGGCGCCA	76	)))))))..))))........((((.))))).......(((((.....))))).......((((((((((((.	AGTCGGTAGAGCATGAGAC	i-tRF	19	ExactMatch	89	86	83	63	37	94	114	94	172	106	184	143	910.495	1292.59	1146.23	784.06	225.125	579.135	460.952	478.852	771.415	663.292	1201.31	707.077	-2.36684	0.00473886	0.0130917	1.91474	0.0327932	0.245845	-1.23611	0.285778	0.354148
AS-tDR-004117	-	-	chr2.trna7564-LysCTT	16	31	GCCCGGCTAGCTCAGTCGGTAGAGCATGAGACTCTTAATCTCAGGGTCGTGGGTTCGAGCCCCACGTTGGGCGCCA	76	)))))))..))))........((((.))))).......(((((.....))))).......((((((((((((.	TCGGTAGAGCATGAGA	i-tRF	16	ExactMatch	111	99	80	62	45	77	127	31	141	139	143	121	1135.56	1487.98	1104.8	771.615	273.801	474.398	513.517	157.919	632.381	869.788	933.628	598.296	-3.16371	0.00384386	0.0128244	2.13404	0.0145568	0.245845	-1.4825	0.0729155	0.122825
AS-tDR-004118	-	-	chr2.trna7564-LysCTT	16	32	GCCCGGCTAGCTCAGTCGGTAGAGCATGAGACTCTTAATCTCAGGGTCGTGGGTTCGAGCCCCACGTTGGGCGCCA	76	)))))))..))))........((((.))))).......(((((.....))))).......((((((((((((.	TCGGTAGAGCATGAGAC	i-tRF	17	ExactMatch	72	59	65	54	42	54	74	0	138	113	117	131	736.58	886.778	897.654	672.051	255.548	332.695	299.215	0	618.926	707.094	763.877	647.742	-3.58634	0.000861108	0.00530147	3.07546	0.00134716	0.0983473	-1.16611	0.127928	0.191186
AS-tDR-007534	-	-	chr2.trna7568-LysCTT	1	33	GCCCGGCTAGCTCAGTCGGTAGAGCATGAGACTCTTAATCTCAGGGTCGTGGGTTCGAGCCCCACGTTGGGCGCCA	76	)))))))..))))........((((.))))).......(((((.....))))).......((((((((((((.	GCCCGGCTAGCTCAGTCGGTAGAGCATGAGACA	tiRNA-5	33	33T>A	99	61	59	79	70	71	106	112	195	114	123	124	1012.8	916.838	814.793	983.186	425.913	437.432	428.605	570.547	874.569	713.352	803.05	613.13	-1.99926	0.000165713	0.00200004	1.61163	0.00515907	0.131019	-1.24052	0.0449082	0.0873126
AS-tDR-001358	-	-	chr2.trna7568-LysCTT	1	33	GCCCGGCTAGCTCAGTCGGTAGAGCATGAGACTCTTAATCTCAGGGTCGTGGGTTCGAGCCCCACGTTGGGCGCCA	76	)))))))..))))........((((.))))).......(((((.....))))).......((((((((((((.	GCCCGGCTAGCTCAGTCGGTAGAGCATGAGACT	tiRNA-5	33	ExactMatch	553	437	435	468	457	451	608	725	1144	662	806	1014	5657.35	6568.17	6007.37	5824.45	2780.6	2778.62	2458.41	3693.27	5130.8	4142.45	5262.26	5013.82	-2.05391	8.7218e-05	0.00124332	1.6691	0.00177493	0.0983473	-1.23055	0.0127558	0.0436369
AS-tDR-001359	-	-	chr2.trna7568-LysCTT	1	34	GCCCGGCTAGCTCAGTCGGTAGAGCATGAGACTCTTAATCTCAGGGTCGTGGGTTCGAGCCCCACGTTGGGCGCCA	76	)))))))..))))........((((.))))).......(((((.....))))).......((((((((((((.	GCCCGGCTAGCTCAGTCGGTAGAGCATGAGACTC	tiRNA-5	34	ExactMatch	89	55	70	53	81	91	149	189	156	85	86	82	910.495	826.657	966.704	659.606	492.842	560.652	602.473	962.797	699.655	531.885	561.482	405.457	-1.28394	0.185883	0.23934	-1.19082	0.41951	0.679728	-1.52894	0.0178821	0.0516162
AS-tDR-013630	-	-	chr2.trna7568-LysCTT	1	35	GCCCGGCTAGCTCAGTCGGTAGAGCATGAGACTCTTAATCTCAGGGTCGTGGGTTCGAGCCCCACGTTGGGCGCCA	76	)))))))..))))........((((.))))).......(((((.....))))).......((((((((((((.	GCCCGGCTAGCTCAGTCGGTAGAGCATGAGACTCA	tiRNA-5	35	35T>A	60	81	77	105	70	157	402	332	117	64	52	55	613.817	1217.44	1063.37	1306.77	425.913	967.279	1625.46	1691.26	524.741	400.478	339.501	271.953	1.12092	0.718516	0.738923	-3.05965	0.0401003	0.245845	-2.72959	0.00645965	0.0275005
AS-tDR-001360	-	-	chr2.trna7568-LysCTT	1	35	GCCCGGCTAGCTCAGTCGGTAGAGCATGAGACTCTTAATCTCAGGGTCGTGGGTTCGAGCCCCACGTTGGGCGCCA	76	)))))))..))))........((((.))))).......(((((.....))))).......((((((((((((.	GCCCGGCTAGCTCAGTCGGTAGAGCATGAGACTCT	tiRNA-5	35	ExactMatch	344	411	357	570	449	889	1985	1755	541	347	327	340	3519.22	6177.39	4930.19	7093.88	2731.92	5477.14	8026.23	8940.26	2426.37	2171.34	2134.94	1681.16	1.15903	0.607992	0.638183	-2.99122	0.0244744	0.245845	-2.5808	0.00566398	0.0262757
AS-tDR-000886	-	-	chr2.trna7568-LysCTT	1	36	GCCCGGCTAGCTCAGTCGGTAGAGCATGAGACTCTTAATCTCAGGGTCGTGGGTTCGAGCCCCACGTTGGGCGCCA	76	)))))))..))))........((((.))))).......(((((.....))))).......((((((((((((.	GCCCGGCTAGCTCAGTCGGTAGAGCATGAGACTCTT	tiRNA-5	36	ExactMatch	115	153	118	226	167	384	870	837	249	137	109	98	1176.48	2299.61	1629.59	2812.66	1016.11	2365.83	3517.8	4263.82	1116.76	857.273	711.646	484.57	1.40963	0.347097	0.381028	-3.51817	0.0323639	0.245845	-2.49582	0.0214772	0.0556641
AS-tDR-011146	-	-	chr2.trna7568-LysCTT	1	51	GCCCGGCTAGCTCAGTCGGTAGAGCATGAGACTCTTAATCTCAGGGTCGTGGGTTCGAGCCCCACGTTGGGCGCCA	76	)))))))..))))........((((.))))).......(((((.....))))).......((((((((((((.	GCCCGGCTAGCTCAGTCGGTAGAGCATGAGACTCTTAATCTCAGGGTCGTG	tRF-5	51	ExactMatch	226	188	255	328	318	194	372	336	102	157	237	127	2312.04	2825.67	3521.56	4082.09	1934.86	1195.24	1504.16	1711.64	457.467	982.423	1547.34	627.964	-2.00718	0.00879673	0.0198741	-1.75451	0.0552359	0.290644	-3.5216	0.0024676	0.0179404
AS-tDR-013631	-	-	chr2.trna7568-LysCTT	2	35	GCCCGGCTAGCTCAGTCGGTAGAGCATGAGACTCTTAATCTCAGGGTCGTGGGTTCGAGCCCCACGTTGGGCGCCA	76	)))))))..))))........((((.))))).......(((((.....))))).......((((((((((((.	CCCGGCTAGCTCAGTCGGTAGAGCATGAGACTCT	tiRNA-5	34	ExactMatch	54	56	30	90	0	80	409	69	71	38	0	26	552.435	841.688	414.302	1120.09	0	492.881	1653.77	351.497	318.433	237.784	0	128.559	-1.172	0.792554	0.810506	-3.63274	0.26054	0.570536	-4.25757	0.017029	0.0515523
AS-tDR-003992	-	-	chr2.trna7568-LysCTT	3	35	GCCCGGCTAGCTCAGTCGGTAGAGCATGAGACTCTTAATCTCAGGGTCGTGGGTTCGAGCCCCACGTTGGGCGCCA	76	)))))))..))))........((((.))))).......(((((.....))))).......((((((((((((.	CCGGCTAGCTCAGTCGGTAGAGCATGAGACTCT	i-tRF	33	ExactMatch	174	240	143	303	76	217	1497	210	231	110	102	109	1780.07	3607.23	1974.84	3770.95	462.419	1336.94	6053.03	1069.77	1036.03	688.322	665.944	538.961	-1.24769	0.704727	0.728843	-3.04309	0.290134	0.596906	-3.79684	0.00871128	0.0330812
AS-tDR-010789	-	-	chr2.trna7568-LysCTT	13	28	GCCCGGCTAGCTCAGTCGGTAGAGCATGAGACTCTTAATCTCAGGGTCGTGGGTTCGAGCCCCACGTTGGGCGCCA	76	)))))))..))))........((((.))))).......(((((.....))))).......((((((((((((.	CAGTCGGTAGAGCATT	i-tRF	16	16G>T	121	89	110	57	34	76	115	34	114	128	100	66	1237.86	1337.68	1519.11	709.388	206.872	468.237	464.996	173.202	511.286	800.956	652.886	326.343	-3.6499	0.003861	0.0128244	1.74255	0.107069	0.392337	-2.09458	0.0205442	0.0544028
AS-tDR-003930	-	-	chr2.trna7568-LysCTT	14	32	GCCCGGCTAGCTCAGTCGGTAGAGCATGAGACTCTTAATCTCAGGGTCGTGGGTTCGAGCCCCACGTTGGGCGCCA	76	)))))))..))))........((((.))))).......(((((.....))))).......((((((((((((.	AGTCGGTAGAGCATGAGAC	i-tRF	19	ExactMatch	89	86	83	63	37	94	114	94	172	106	184	143	910.495	1292.59	1146.23	784.06	225.125	579.135	460.952	478.852	771.415	663.292	1201.31	707.077	-2.36684	0.00473886	0.0130917	1.91474	0.0327932	0.245845	-1.23611	0.285778	0.354148
AS-tDR-004117	-	-	chr2.trna7568-LysCTT	16	31	GCCCGGCTAGCTCAGTCGGTAGAGCATGAGACTCTTAATCTCAGGGTCGTGGGTTCGAGCCCCACGTTGGGCGCCA	76	)))))))..))))........((((.))))).......(((((.....))))).......((((((((((((.	TCGGTAGAGCATGAGA	i-tRF	16	ExactMatch	111	99	80	62	45	77	127	31	141	139	143	121	1135.56	1487.98	1104.8	771.615	273.801	474.398	513.517	157.919	632.381	869.788	933.628	598.296	-3.16371	0.00384386	0.0128244	2.13404	0.0145568	0.245845	-1.4825	0.0729155	0.122825
AS-tDR-004118	-	-	chr2.trna7568-LysCTT	16	32	GCCCGGCTAGCTCAGTCGGTAGAGCATGAGACTCTTAATCTCAGGGTCGTGGGTTCGAGCCCCACGTTGGGCGCCA	76	)))))))..))))........((((.))))).......(((((.....))))).......((((((((((((.	TCGGTAGAGCATGAGAC	i-tRF	17	ExactMatch	72	59	65	54	42	54	74	0	138	113	117	131	736.58	886.778	897.654	672.051	255.548	332.695	299.215	0	618.926	707.094	763.877	647.742	-3.58634	0.000861108	0.00530147	3.07546	0.00134716	0.0983473	-1.16611	0.127928	0.191186
AS-tDR-007534	-	-	chr7.trna2975-LysCTT	1	33	GCCCGGCTAGCTCAGTCGGTAGAGCATGAGACTCTTAATCTCAGGGTCGTGGGTTCGAGCCCCACGTTGGGCGCCA	76	)))))))..))))........((((.))))).......(((((.....))))).......((((((((((((.	GCCCGGCTAGCTCAGTCGGTAGAGCATGAGACA	tiRNA-5	33	33T>A	99	61	59	79	70	71	106	112	195	114	123	124	1012.8	916.838	814.793	983.186	425.913	437.432	428.605	570.547	874.569	713.352	803.05	613.13	-1.99926	0.000165713	0.00200004	1.61163	0.00515907	0.131019	-1.24052	0.0449082	0.0873126
AS-tDR-001358	-	-	chr7.trna2975-LysCTT	1	33	GCCCGGCTAGCTCAGTCGGTAGAGCATGAGACTCTTAATCTCAGGGTCGTGGGTTCGAGCCCCACGTTGGGCGCCA	76	)))))))..))))........((((.))))).......(((((.....))))).......((((((((((((.	GCCCGGCTAGCTCAGTCGGTAGAGCATGAGACT	tiRNA-5	33	ExactMatch	553	437	435	468	457	451	608	725	1144	662	806	1014	5657.35	6568.17	6007.37	5824.45	2780.6	2778.62	2458.41	3693.27	5130.8	4142.45	5262.26	5013.82	-2.05391	8.7218e-05	0.00124332	1.6691	0.00177493	0.0983473	-1.23055	0.0127558	0.0436369
AS-tDR-001359	-	-	chr7.trna2975-LysCTT	1	34	GCCCGGCTAGCTCAGTCGGTAGAGCATGAGACTCTTAATCTCAGGGTCGTGGGTTCGAGCCCCACGTTGGGCGCCA	76	)))))))..))))........((((.))))).......(((((.....))))).......((((((((((((.	GCCCGGCTAGCTCAGTCGGTAGAGCATGAGACTC	tiRNA-5	34	ExactMatch	89	55	70	53	81	91	149	189	156	85	86	82	910.495	826.657	966.704	659.606	492.842	560.652	602.473	962.797	699.655	531.885	561.482	405.457	-1.28394	0.185883	0.23934	-1.19082	0.41951	0.679728	-1.52894	0.0178821	0.0516162
AS-tDR-013630	-	-	chr7.trna2975-LysCTT	1	35	GCCCGGCTAGCTCAGTCGGTAGAGCATGAGACTCTTAATCTCAGGGTCGTGGGTTCGAGCCCCACGTTGGGCGCCA	76	)))))))..))))........((((.))))).......(((((.....))))).......((((((((((((.	GCCCGGCTAGCTCAGTCGGTAGAGCATGAGACTCA	tiRNA-5	35	35T>A	60	81	77	105	70	157	402	332	117	64	52	55	613.817	1217.44	1063.37	1306.77	425.913	967.279	1625.46	1691.26	524.741	400.478	339.501	271.953	1.12092	0.718516	0.738923	-3.05965	0.0401003	0.245845	-2.72959	0.00645965	0.0275005
AS-tDR-001360	-	-	chr7.trna2975-LysCTT	1	35	GCCCGGCTAGCTCAGTCGGTAGAGCATGAGACTCTTAATCTCAGGGTCGTGGGTTCGAGCCCCACGTTGGGCGCCA	76	)))))))..))))........((((.))))).......(((((.....))))).......((((((((((((.	GCCCGGCTAGCTCAGTCGGTAGAGCATGAGACTCT	tiRNA-5	35	ExactMatch	344	411	357	570	449	889	1985	1755	541	347	327	340	3519.22	6177.39	4930.19	7093.88	2731.92	5477.14	8026.23	8940.26	2426.37	2171.34	2134.94	1681.16	1.15903	0.607992	0.638183	-2.99122	0.0244744	0.245845	-2.5808	0.00566398	0.0262757
AS-tDR-000886	-	-	chr7.trna2975-LysCTT	1	36	GCCCGGCTAGCTCAGTCGGTAGAGCATGAGACTCTTAATCTCAGGGTCGTGGGTTCGAGCCCCACGTTGGGCGCCA	76	)))))))..))))........((((.))))).......(((((.....))))).......((((((((((((.	GCCCGGCTAGCTCAGTCGGTAGAGCATGAGACTCTT	tiRNA-5	36	ExactMatch	115	153	118	226	167	384	870	837	249	137	109	98	1176.48	2299.61	1629.59	2812.66	1016.11	2365.83	3517.8	4263.82	1116.76	857.273	711.646	484.57	1.40963	0.347097	0.381028	-3.51817	0.0323639	0.245845	-2.49582	0.0214772	0.0556641
AS-tDR-011146	-	-	chr7.trna2975-LysCTT	1	51	GCCCGGCTAGCTCAGTCGGTAGAGCATGAGACTCTTAATCTCAGGGTCGTGGGTTCGAGCCCCACGTTGGGCGCCA	76	)))))))..))))........((((.))))).......(((((.....))))).......((((((((((((.	GCCCGGCTAGCTCAGTCGGTAGAGCATGAGACTCTTAATCTCAGGGTCGTG	tRF-5	51	ExactMatch	226	188	255	328	318	194	372	336	102	157	237	127	2312.04	2825.67	3521.56	4082.09	1934.86	1195.24	1504.16	1711.64	457.467	982.423	1547.34	627.964	-2.00718	0.00879673	0.0198741	-1.75451	0.0552359	0.290644	-3.5216	0.0024676	0.0179404
AS-tDR-013631	-	-	chr7.trna2975-LysCTT	2	35	GCCCGGCTAGCTCAGTCGGTAGAGCATGAGACTCTTAATCTCAGGGTCGTGGGTTCGAGCCCCACGTTGGGCGCCA	76	)))))))..))))........((((.))))).......(((((.....))))).......((((((((((((.	CCCGGCTAGCTCAGTCGGTAGAGCATGAGACTCT	tiRNA-5	34	ExactMatch	54	56	30	90	0	80	409	69	71	38	0	26	552.435	841.688	414.302	1120.09	0	492.881	1653.77	351.497	318.433	237.784	0	128.559	-1.172	0.792554	0.810506	-3.63274	0.26054	0.570536	-4.25757	0.017029	0.0515523
AS-tDR-003992	-	-	chr7.trna2975-LysCTT	3	35	GCCCGGCTAGCTCAGTCGGTAGAGCATGAGACTCTTAATCTCAGGGTCGTGGGTTCGAGCCCCACGTTGGGCGCCA	76	)))))))..))))........((((.))))).......(((((.....))))).......((((((((((((.	CCGGCTAGCTCAGTCGGTAGAGCATGAGACTCT	i-tRF	33	ExactMatch	174	240	143	303	76	217	1497	210	231	110	102	109	1780.07	3607.23	1974.84	3770.95	462.419	1336.94	6053.03	1069.77	1036.03	688.322	665.944	538.961	-1.24769	0.704727	0.728843	-3.04309	0.290134	0.596906	-3.79684	0.00871128	0.0330812
AS-tDR-010789	-	-	chr7.trna2975-LysCTT	13	28	GCCCGGCTAGCTCAGTCGGTAGAGCATGAGACTCTTAATCTCAGGGTCGTGGGTTCGAGCCCCACGTTGGGCGCCA	76	)))))))..))))........((((.))))).......(((((.....))))).......((((((((((((.	CAGTCGGTAGAGCATT	i-tRF	16	16G>T	121	89	110	57	34	76	115	34	114	128	100	66	1237.86	1337.68	1519.11	709.388	206.872	468.237	464.996	173.202	511.286	800.956	652.886	326.343	-3.6499	0.003861	0.0128244	1.74255	0.107069	0.392337	-2.09458	0.0205442	0.0544028
AS-tDR-003930	-	-	chr7.trna2975-LysCTT	14	32	GCCCGGCTAGCTCAGTCGGTAGAGCATGAGACTCTTAATCTCAGGGTCGTGGGTTCGAGCCCCACGTTGGGCGCCA	76	)))))))..))))........((((.))))).......(((((.....))))).......((((((((((((.	AGTCGGTAGAGCATGAGAC	i-tRF	19	ExactMatch	89	86	83	63	37	94	114	94	172	106	184	143	910.495	1292.59	1146.23	784.06	225.125	579.135	460.952	478.852	771.415	663.292	1201.31	707.077	-2.36684	0.00473886	0.0130917	1.91474	0.0327932	0.245845	-1.23611	0.285778	0.354148
AS-tDR-004117	-	-	chr7.trna2975-LysCTT	16	31	GCCCGGCTAGCTCAGTCGGTAGAGCATGAGACTCTTAATCTCAGGGTCGTGGGTTCGAGCCCCACGTTGGGCGCCA	76	)))))))..))))........((((.))))).......(((((.....))))).......((((((((((((.	TCGGTAGAGCATGAGA	i-tRF	16	ExactMatch	111	99	80	62	45	77	127	31	141	139	143	121	1135.56	1487.98	1104.8	771.615	273.801	474.398	513.517	157.919	632.381	869.788	933.628	598.296	-3.16371	0.00384386	0.0128244	2.13404	0.0145568	0.245845	-1.4825	0.0729155	0.122825
AS-tDR-004118	-	-	chr7.trna2975-LysCTT	16	32	GCCCGGCTAGCTCAGTCGGTAGAGCATGAGACTCTTAATCTCAGGGTCGTGGGTTCGAGCCCCACGTTGGGCGCCA	76	)))))))..))))........((((.))))).......(((((.....))))).......((((((((((((.	TCGGTAGAGCATGAGAC	i-tRF	17	ExactMatch	72	59	65	54	42	54	74	0	138	113	117	131	736.58	886.778	897.654	672.051	255.548	332.695	299.215	0	618.926	707.094	763.877	647.742	-3.58634	0.000861108	0.00530147	3.07546	0.00134716	0.0983473	-1.16611	0.127928	0.191186
AS-tDR-007534	-	-	pre-chr10.trna12493-LysCTT	41	73	AAACGTAGGGATGGCGAAATAAAGTCGCTCTCTGCACAGCGCCCGGCTAGCTCAGTCGGTAGAGCATGAGACTCTTAATCTCAGGGTCGTGGGTTCGAGCCCCACGTTGGGCGCAAGTAAATGTTTTTAAACCACGATAGGAACAAGACAACT	153	....(((((((((((........)))).)))))))...(((((((((..((((........))))....((((((.......))))))..((((....))))...)))))))))..((...((((((((........))))))))..))....	GCCCGGCTAGCTCAGTCGGTAGAGCATGAGACA	Other	33	33T>A	99	61	59	79	70	71	106	112	195	114	123	124	1012.8	916.838	814.793	983.186	425.913	437.432	428.605	570.547	874.569	713.352	803.05	613.13	-1.99926	0.000165713	0.00200004	1.61163	0.00515907	0.131019	-1.24052	0.0449082	0.0873126
AS-tDR-001358	-	-	pre-chr10.trna12493-LysCTT	41	73	AAACGTAGGGATGGCGAAATAAAGTCGCTCTCTGCACAGCGCCCGGCTAGCTCAGTCGGTAGAGCATGAGACTCTTAATCTCAGGGTCGTGGGTTCGAGCCCCACGTTGGGCGCAAGTAAATGTTTTTAAACCACGATAGGAACAAGACAACT	153	....(((((((((((........)))).)))))))...(((((((((..((((........))))....((((((.......))))))..((((....))))...)))))))))..((...((((((((........))))))))..))....	GCCCGGCTAGCTCAGTCGGTAGAGCATGAGACT	Other	33	ExactMatch	553	437	435	468	457	451	608	725	1144	662	806	1014	5657.35	6568.17	6007.37	5824.45	2780.6	2778.62	2458.41	3693.27	5130.8	4142.45	5262.26	5013.82	-2.05391	8.7218e-05	0.00124332	1.6691	0.00177493	0.0983473	-1.23055	0.0127558	0.0436369
AS-tDR-001359	-	-	pre-chr10.trna12493-LysCTT	41	74	AAACGTAGGGATGGCGAAATAAAGTCGCTCTCTGCACAGCGCCCGGCTAGCTCAGTCGGTAGAGCATGAGACTCTTAATCTCAGGGTCGTGGGTTCGAGCCCCACGTTGGGCGCAAGTAAATGTTTTTAAACCACGATAGGAACAAGACAACT	153	....(((((((((((........)))).)))))))...(((((((((..((((........))))....((((((.......))))))..((((....))))...)))))))))..((...((((((((........))))))))..))....	GCCCGGCTAGCTCAGTCGGTAGAGCATGAGACTC	Other	34	ExactMatch	89	55	70	53	81	91	149	189	156	85	86	82	910.495	826.657	966.704	659.606	492.842	560.652	602.473	962.797	699.655	531.885	561.482	405.457	-1.28394	0.185883	0.23934	-1.19082	0.41951	0.679728	-1.52894	0.0178821	0.0516162
AS-tDR-013630	-	-	pre-chr10.trna12493-LysCTT	41	75	AAACGTAGGGATGGCGAAATAAAGTCGCTCTCTGCACAGCGCCCGGCTAGCTCAGTCGGTAGAGCATGAGACTCTTAATCTCAGGGTCGTGGGTTCGAGCCCCACGTTGGGCGCAAGTAAATGTTTTTAAACCACGATAGGAACAAGACAACT	153	....(((((((((((........)))).)))))))...(((((((((..((((........))))....((((((.......))))))..((((....))))...)))))))))..((...((((((((........))))))))..))....	GCCCGGCTAGCTCAGTCGGTAGAGCATGAGACTCA	Other	35	35T>A	60	81	77	105	70	157	402	332	117	64	52	55	613.817	1217.44	1063.37	1306.77	425.913	967.279	1625.46	1691.26	524.741	400.478	339.501	271.953	1.12092	0.718516	0.738923	-3.05965	0.0401003	0.245845	-2.72959	0.00645965	0.0275005
AS-tDR-001360	-	-	pre-chr10.trna12493-LysCTT	41	75	AAACGTAGGGATGGCGAAATAAAGTCGCTCTCTGCACAGCGCCCGGCTAGCTCAGTCGGTAGAGCATGAGACTCTTAATCTCAGGGTCGTGGGTTCGAGCCCCACGTTGGGCGCAAGTAAATGTTTTTAAACCACGATAGGAACAAGACAACT	153	....(((((((((((........)))).)))))))...(((((((((..((((........))))....((((((.......))))))..((((....))))...)))))))))..((...((((((((........))))))))..))....	GCCCGGCTAGCTCAGTCGGTAGAGCATGAGACTCT	Other	35	ExactMatch	344	411	357	570	449	889	1985	1755	541	347	327	340	3519.22	6177.39	4930.19	7093.88	2731.92	5477.14	8026.23	8940.26	2426.37	2171.34	2134.94	1681.16	1.15903	0.607992	0.638183	-2.99122	0.0244744	0.245845	-2.5808	0.00566398	0.0262757
AS-tDR-000886	-	-	pre-chr10.trna12493-LysCTT	41	76	AAACGTAGGGATGGCGAAATAAAGTCGCTCTCTGCACAGCGCCCGGCTAGCTCAGTCGGTAGAGCATGAGACTCTTAATCTCAGGGTCGTGGGTTCGAGCCCCACGTTGGGCGCAAGTAAATGTTTTTAAACCACGATAGGAACAAGACAACT	153	....(((((((((((........)))).)))))))...(((((((((..((((........))))....((((((.......))))))..((((....))))...)))))))))..((...((((((((........))))))))..))....	GCCCGGCTAGCTCAGTCGGTAGAGCATGAGACTCTT	Other	36	ExactMatch	115	153	118	226	167	384	870	837	249	137	109	98	1176.48	2299.61	1629.59	2812.66	1016.11	2365.83	3517.8	4263.82	1116.76	857.273	711.646	484.57	1.40963	0.347097	0.381028	-3.51817	0.0323639	0.245845	-2.49582	0.0214772	0.0556641
AS-tDR-011146	-	-	pre-chr10.trna12493-LysCTT	41	91	AAACGTAGGGATGGCGAAATAAAGTCGCTCTCTGCACAGCGCCCGGCTAGCTCAGTCGGTAGAGCATGAGACTCTTAATCTCAGGGTCGTGGGTTCGAGCCCCACGTTGGGCGCAAGTAAATGTTTTTAAACCACGATAGGAACAAGACAACT	153	....(((((((((((........)))).)))))))...(((((((((..((((........))))....((((((.......))))))..((((....))))...)))))))))..((...((((((((........))))))))..))....	GCCCGGCTAGCTCAGTCGGTAGAGCATGAGACTCTTAATCTCAGGGTCGTG	Other	51	ExactMatch	226	188	255	328	318	194	372	336	102	157	237	127	2312.04	2825.67	3521.56	4082.09	1934.86	1195.24	1504.16	1711.64	457.467	982.423	1547.34	627.964	-2.00718	0.00879673	0.0198741	-1.75451	0.0552359	0.290644	-3.5216	0.0024676	0.0179404
AS-tDR-013631	-	-	pre-chr10.trna12493-LysCTT	42	75	AAACGTAGGGATGGCGAAATAAAGTCGCTCTCTGCACAGCGCCCGGCTAGCTCAGTCGGTAGAGCATGAGACTCTTAATCTCAGGGTCGTGGGTTCGAGCCCCACGTTGGGCGCAAGTAAATGTTTTTAAACCACGATAGGAACAAGACAACT	153	....(((((((((((........)))).)))))))...(((((((((..((((........))))....((((((.......))))))..((((....))))...)))))))))..((...((((((((........))))))))..))....	CCCGGCTAGCTCAGTCGGTAGAGCATGAGACTCT	Other	34	ExactMatch	54	56	30	90	0	80	409	69	71	38	0	26	552.435	841.688	414.302	1120.09	0	492.881	1653.77	351.497	318.433	237.784	0	128.559	-1.172	0.792554	0.810506	-3.63274	0.26054	0.570536	-4.25757	0.017029	0.0515523
AS-tDR-003992	-	-	pre-chr10.trna12493-LysCTT	43	75	AAACGTAGGGATGGCGAAATAAAGTCGCTCTCTGCACAGCGCCCGGCTAGCTCAGTCGGTAGAGCATGAGACTCTTAATCTCAGGGTCGTGGGTTCGAGCCCCACGTTGGGCGCAAGTAAATGTTTTTAAACCACGATAGGAACAAGACAACT	153	....(((((((((((........)))).)))))))...(((((((((..((((........))))....((((((.......))))))..((((....))))...)))))))))..((...((((((((........))))))))..))....	CCGGCTAGCTCAGTCGGTAGAGCATGAGACTCT	Other	33	ExactMatch	174	240	143	303	76	217	1497	210	231	110	102	109	1780.07	3607.23	1974.84	3770.95	462.419	1336.94	6053.03	1069.77	1036.03	688.322	665.944	538.961	-1.24769	0.704727	0.728843	-3.04309	0.290134	0.596906	-3.79684	0.00871128	0.0330812
AS-tDR-010789	-	-	pre-chr10.trna12493-LysCTT	53	68	AAACGTAGGGATGGCGAAATAAAGTCGCTCTCTGCACAGCGCCCGGCTAGCTCAGTCGGTAGAGCATGAGACTCTTAATCTCAGGGTCGTGGGTTCGAGCCCCACGTTGGGCGCAAGTAAATGTTTTTAAACCACGATAGGAACAAGACAACT	153	....(((((((((((........)))).)))))))...(((((((((..((((........))))....((((((.......))))))..((((....))))...)))))))))..((...((((((((........))))))))..))....	CAGTCGGTAGAGCATT	Other	16	16G>T	121	89	110	57	34	76	115	34	114	128	100	66	1237.86	1337.68	1519.11	709.388	206.872	468.237	464.996	173.202	511.286	800.956	652.886	326.343	-3.6499	0.003861	0.0128244	1.74255	0.107069	0.392337	-2.09458	0.0205442	0.0544028
AS-tDR-003930	-	-	pre-chr10.trna12493-LysCTT	54	72	AAACGTAGGGATGGCGAAATAAAGTCGCTCTCTGCACAGCGCCCGGCTAGCTCAGTCGGTAGAGCATGAGACTCTTAATCTCAGGGTCGTGGGTTCGAGCCCCACGTTGGGCGCAAGTAAATGTTTTTAAACCACGATAGGAACAAGACAACT	153	....(((((((((((........)))).)))))))...(((((((((..((((........))))....((((((.......))))))..((((....))))...)))))))))..((...((((((((........))))))))..))....	AGTCGGTAGAGCATGAGAC	Other	19	ExactMatch	89	86	83	63	37	94	114	94	172	106	184	143	910.495	1292.59	1146.23	784.06	225.125	579.135	460.952	478.852	771.415	663.292	1201.31	707.077	-2.36684	0.00473886	0.0130917	1.91474	0.0327932	0.245845	-1.23611	0.285778	0.354148
AS-tDR-004117	-	-	pre-chr10.trna12493-LysCTT	56	71	AAACGTAGGGATGGCGAAATAAAGTCGCTCTCTGCACAGCGCCCGGCTAGCTCAGTCGGTAGAGCATGAGACTCTTAATCTCAGGGTCGTGGGTTCGAGCCCCACGTTGGGCGCAAGTAAATGTTTTTAAACCACGATAGGAACAAGACAACT	153	....(((((((((((........)))).)))))))...(((((((((..((((........))))....((((((.......))))))..((((....))))...)))))))))..((...((((((((........))))))))..))....	TCGGTAGAGCATGAGA	Other	16	ExactMatch	111	99	80	62	45	77	127	31	141	139	143	121	1135.56	1487.98	1104.8	771.615	273.801	474.398	513.517	157.919	632.381	869.788	933.628	598.296	-3.16371	0.00384386	0.0128244	2.13404	0.0145568	0.245845	-1.4825	0.0729155	0.122825
AS-tDR-004118	-	-	pre-chr10.trna12493-LysCTT	56	72	AAACGTAGGGATGGCGAAATAAAGTCGCTCTCTGCACAGCGCCCGGCTAGCTCAGTCGGTAGAGCATGAGACTCTTAATCTCAGGGTCGTGGGTTCGAGCCCCACGTTGGGCGCAAGTAAATGTTTTTAAACCACGATAGGAACAAGACAACT	153	....(((((((((((........)))).)))))))...(((((((((..((((........))))....((((((.......))))))..((((....))))...)))))))))..((...((((((((........))))))))..))....	TCGGTAGAGCATGAGAC	Other	17	ExactMatch	72	59	65	54	42	54	74	0	138	113	117	131	736.58	886.778	897.654	672.051	255.548	332.695	299.215	0	618.926	707.094	763.877	647.742	-3.58634	0.000861108	0.00530147	3.07546	0.00134716	0.0983473	-1.16611	0.127928	0.191186
AS-tDR-007534	-	-	pre-chr10.trna13308-LysCTT	41	73	TAATGGCTCTGTAACTCATTGGTCATCACCTTGCTATGCAGCCCGGCTAGCTCAGTCGGTAGAGCATGAGACTCTTAATCTCAGGGTCGTGGGTTCGAGCCCCACGTTGGGCGTAGCTATTTTGCTATCGGAGATCTCATAAAGAAAGGAGAA	153	......((((....(((..(((.((.......(((((((.((((.....((((........))))..((((.......)))).))))((((((.......))))))....))))))).....)))))...))).(((.....)))..))))..	GCCCGGCTAGCTCAGTCGGTAGAGCATGAGACA	Other	33	33T>A	99	61	59	79	70	71	106	112	195	114	123	124	1012.8	916.838	814.793	983.186	425.913	437.432	428.605	570.547	874.569	713.352	803.05	613.13	-1.99926	0.000165713	0.00200004	1.61163	0.00515907	0.131019	-1.24052	0.0449082	0.0873126
AS-tDR-001358	-	-	pre-chr10.trna13308-LysCTT	41	73	TAATGGCTCTGTAACTCATTGGTCATCACCTTGCTATGCAGCCCGGCTAGCTCAGTCGGTAGAGCATGAGACTCTTAATCTCAGGGTCGTGGGTTCGAGCCCCACGTTGGGCGTAGCTATTTTGCTATCGGAGATCTCATAAAGAAAGGAGAA	153	......((((....(((..(((.((.......(((((((.((((.....((((........))))..((((.......)))).))))((((((.......))))))....))))))).....)))))...))).(((.....)))..))))..	GCCCGGCTAGCTCAGTCGGTAGAGCATGAGACT	Other	33	ExactMatch	553	437	435	468	457	451	608	725	1144	662	806	1014	5657.35	6568.17	6007.37	5824.45	2780.6	2778.62	2458.41	3693.27	5130.8	4142.45	5262.26	5013.82	-2.05391	8.7218e-05	0.00124332	1.6691	0.00177493	0.0983473	-1.23055	0.0127558	0.0436369
AS-tDR-001359	-	-	pre-chr10.trna13308-LysCTT	41	74	TAATGGCTCTGTAACTCATTGGTCATCACCTTGCTATGCAGCCCGGCTAGCTCAGTCGGTAGAGCATGAGACTCTTAATCTCAGGGTCGTGGGTTCGAGCCCCACGTTGGGCGTAGCTATTTTGCTATCGGAGATCTCATAAAGAAAGGAGAA	153	......((((....(((..(((.((.......(((((((.((((.....((((........))))..((((.......)))).))))((((((.......))))))....))))))).....)))))...))).(((.....)))..))))..	GCCCGGCTAGCTCAGTCGGTAGAGCATGAGACTC	Other	34	ExactMatch	89	55	70	53	81	91	149	189	156	85	86	82	910.495	826.657	966.704	659.606	492.842	560.652	602.473	962.797	699.655	531.885	561.482	405.457	-1.28394	0.185883	0.23934	-1.19082	0.41951	0.679728	-1.52894	0.0178821	0.0516162
AS-tDR-013630	-	-	pre-chr10.trna13308-LysCTT	41	75	TAATGGCTCTGTAACTCATTGGTCATCACCTTGCTATGCAGCCCGGCTAGCTCAGTCGGTAGAGCATGAGACTCTTAATCTCAGGGTCGTGGGTTCGAGCCCCACGTTGGGCGTAGCTATTTTGCTATCGGAGATCTCATAAAGAAAGGAGAA	153	......((((....(((..(((.((.......(((((((.((((.....((((........))))..((((.......)))).))))((((((.......))))))....))))))).....)))))...))).(((.....)))..))))..	GCCCGGCTAGCTCAGTCGGTAGAGCATGAGACTCA	Other	35	35T>A	60	81	77	105	70	157	402	332	117	64	52	55	613.817	1217.44	1063.37	1306.77	425.913	967.279	1625.46	1691.26	524.741	400.478	339.501	271.953	1.12092	0.718516	0.738923	-3.05965	0.0401003	0.245845	-2.72959	0.00645965	0.0275005
AS-tDR-001360	-	-	pre-chr10.trna13308-LysCTT	41	75	TAATGGCTCTGTAACTCATTGGTCATCACCTTGCTATGCAGCCCGGCTAGCTCAGTCGGTAGAGCATGAGACTCTTAATCTCAGGGTCGTGGGTTCGAGCCCCACGTTGGGCGTAGCTATTTTGCTATCGGAGATCTCATAAAGAAAGGAGAA	153	......((((....(((..(((.((.......(((((((.((((.....((((........))))..((((.......)))).))))((((((.......))))))....))))))).....)))))...))).(((.....)))..))))..	GCCCGGCTAGCTCAGTCGGTAGAGCATGAGACTCT	Other	35	ExactMatch	344	411	357	570	449	889	1985	1755	541	347	327	340	3519.22	6177.39	4930.19	7093.88	2731.92	5477.14	8026.23	8940.26	2426.37	2171.34	2134.94	1681.16	1.15903	0.607992	0.638183	-2.99122	0.0244744	0.245845	-2.5808	0.00566398	0.0262757
AS-tDR-000886	-	-	pre-chr10.trna13308-LysCTT	41	76	TAATGGCTCTGTAACTCATTGGTCATCACCTTGCTATGCAGCCCGGCTAGCTCAGTCGGTAGAGCATGAGACTCTTAATCTCAGGGTCGTGGGTTCGAGCCCCACGTTGGGCGTAGCTATTTTGCTATCGGAGATCTCATAAAGAAAGGAGAA	153	......((((....(((..(((.((.......(((((((.((((.....((((........))))..((((.......)))).))))((((((.......))))))....))))))).....)))))...))).(((.....)))..))))..	GCCCGGCTAGCTCAGTCGGTAGAGCATGAGACTCTT	Other	36	ExactMatch	115	153	118	226	167	384	870	837	249	137	109	98	1176.48	2299.61	1629.59	2812.66	1016.11	2365.83	3517.8	4263.82	1116.76	857.273	711.646	484.57	1.40963	0.347097	0.381028	-3.51817	0.0323639	0.245845	-2.49582	0.0214772	0.0556641
AS-tDR-011146	-	-	pre-chr10.trna13308-LysCTT	41	91	TAATGGCTCTGTAACTCATTGGTCATCACCTTGCTATGCAGCCCGGCTAGCTCAGTCGGTAGAGCATGAGACTCTTAATCTCAGGGTCGTGGGTTCGAGCCCCACGTTGGGCGTAGCTATTTTGCTATCGGAGATCTCATAAAGAAAGGAGAA	153	......((((....(((..(((.((.......(((((((.((((.....((((........))))..((((.......)))).))))((((((.......))))))....))))))).....)))))...))).(((.....)))..))))..	GCCCGGCTAGCTCAGTCGGTAGAGCATGAGACTCTTAATCTCAGGGTCGTG	Other	51	ExactMatch	226	188	255	328	318	194	372	336	102	157	237	127	2312.04	2825.67	3521.56	4082.09	1934.86	1195.24	1504.16	1711.64	457.467	982.423	1547.34	627.964	-2.00718	0.00879673	0.0198741	-1.75451	0.0552359	0.290644	-3.5216	0.0024676	0.0179404
AS-tDR-013631	-	-	pre-chr10.trna13308-LysCTT	42	75	TAATGGCTCTGTAACTCATTGGTCATCACCTTGCTATGCAGCCCGGCTAGCTCAGTCGGTAGAGCATGAGACTCTTAATCTCAGGGTCGTGGGTTCGAGCCCCACGTTGGGCGTAGCTATTTTGCTATCGGAGATCTCATAAAGAAAGGAGAA	153	......((((....(((..(((.((.......(((((((.((((.....((((........))))..((((.......)))).))))((((((.......))))))....))))))).....)))))...))).(((.....)))..))))..	CCCGGCTAGCTCAGTCGGTAGAGCATGAGACTCT	Other	34	ExactMatch	54	56	30	90	0	80	409	69	71	38	0	26	552.435	841.688	414.302	1120.09	0	492.881	1653.77	351.497	318.433	237.784	0	128.559	-1.172	0.792554	0.810506	-3.63274	0.26054	0.570536	-4.25757	0.017029	0.0515523
AS-tDR-003992	-	-	pre-chr10.trna13308-LysCTT	43	75	TAATGGCTCTGTAACTCATTGGTCATCACCTTGCTATGCAGCCCGGCTAGCTCAGTCGGTAGAGCATGAGACTCTTAATCTCAGGGTCGTGGGTTCGAGCCCCACGTTGGGCGTAGCTATTTTGCTATCGGAGATCTCATAAAGAAAGGAGAA	153	......((((....(((..(((.((.......(((((((.((((.....((((........))))..((((.......)))).))))((((((.......))))))....))))))).....)))))...))).(((.....)))..))))..	CCGGCTAGCTCAGTCGGTAGAGCATGAGACTCT	Other	33	ExactMatch	174	240	143	303	76	217	1497	210	231	110	102	109	1780.07	3607.23	1974.84	3770.95	462.419	1336.94	6053.03	1069.77	1036.03	688.322	665.944	538.961	-1.24769	0.704727	0.728843	-3.04309	0.290134	0.596906	-3.79684	0.00871128	0.0330812
AS-tDR-010789	-	-	pre-chr10.trna13308-LysCTT	53	68	TAATGGCTCTGTAACTCATTGGTCATCACCTTGCTATGCAGCCCGGCTAGCTCAGTCGGTAGAGCATGAGACTCTTAATCTCAGGGTCGTGGGTTCGAGCCCCACGTTGGGCGTAGCTATTTTGCTATCGGAGATCTCATAAAGAAAGGAGAA	153	......((((....(((..(((.((.......(((((((.((((.....((((........))))..((((.......)))).))))((((((.......))))))....))))))).....)))))...))).(((.....)))..))))..	CAGTCGGTAGAGCATT	Other	16	16G>T	121	89	110	57	34	76	115	34	114	128	100	66	1237.86	1337.68	1519.11	709.388	206.872	468.237	464.996	173.202	511.286	800.956	652.886	326.343	-3.6499	0.003861	0.0128244	1.74255	0.107069	0.392337	-2.09458	0.0205442	0.0544028
AS-tDR-003930	-	-	pre-chr10.trna13308-LysCTT	54	72	TAATGGCTCTGTAACTCATTGGTCATCACCTTGCTATGCAGCCCGGCTAGCTCAGTCGGTAGAGCATGAGACTCTTAATCTCAGGGTCGTGGGTTCGAGCCCCACGTTGGGCGTAGCTATTTTGCTATCGGAGATCTCATAAAGAAAGGAGAA	153	......((((....(((..(((.((.......(((((((.((((.....((((........))))..((((.......)))).))))((((((.......))))))....))))))).....)))))...))).(((.....)))..))))..	AGTCGGTAGAGCATGAGAC	Other	19	ExactMatch	89	86	83	63	37	94	114	94	172	106	184	143	910.495	1292.59	1146.23	784.06	225.125	579.135	460.952	478.852	771.415	663.292	1201.31	707.077	-2.36684	0.00473886	0.0130917	1.91474	0.0327932	0.245845	-1.23611	0.285778	0.354148
AS-tDR-004117	-	-	pre-chr10.trna13308-LysCTT	56	71	TAATGGCTCTGTAACTCATTGGTCATCACCTTGCTATGCAGCCCGGCTAGCTCAGTCGGTAGAGCATGAGACTCTTAATCTCAGGGTCGTGGGTTCGAGCCCCACGTTGGGCGTAGCTATTTTGCTATCGGAGATCTCATAAAGAAAGGAGAA	153	......((((....(((..(((.((.......(((((((.((((.....((((........))))..((((.......)))).))))((((((.......))))))....))))))).....)))))...))).(((.....)))..))))..	TCGGTAGAGCATGAGA	Other	16	ExactMatch	111	99	80	62	45	77	127	31	141	139	143	121	1135.56	1487.98	1104.8	771.615	273.801	474.398	513.517	157.919	632.381	869.788	933.628	598.296	-3.16371	0.00384386	0.0128244	2.13404	0.0145568	0.245845	-1.4825	0.0729155	0.122825
AS-tDR-004118	-	-	pre-chr10.trna13308-LysCTT	56	72	TAATGGCTCTGTAACTCATTGGTCATCACCTTGCTATGCAGCCCGGCTAGCTCAGTCGGTAGAGCATGAGACTCTTAATCTCAGGGTCGTGGGTTCGAGCCCCACGTTGGGCGTAGCTATTTTGCTATCGGAGATCTCATAAAGAAAGGAGAA	153	......((((....(((..(((.((.......(((((((.((((.....((((........))))..((((.......)))).))))((((((.......))))))....))))))).....)))))...))).(((.....)))..))))..	TCGGTAGAGCATGAGAC	Other	17	ExactMatch	72	59	65	54	42	54	74	0	138	113	117	131	736.58	886.778	897.654	672.051	255.548	332.695	299.215	0	618.926	707.094	763.877	647.742	-3.58634	0.000861108	0.00530147	3.07546	0.00134716	0.0983473	-1.16611	0.127928	0.191186
AS-tDR-007534	-	-	pre-chr10.trna13312-LysCTT	41	73	TCAGGTCACGTGTAGTAAACTTCGAGCTCAGAGAGCAGTTGCCCGGCTAGCTCAGTCGGTAGAGCATGAGACTCTTAATCTCAGGGTCGTGGGTTCGAGCCCCACGTTGGGCGGCTACACATTTTGGTTTGGACTTCGTGAATCTTAAGGTGT	153	..((((((((.((..((((((....((((...)))).((((((((((..((((........))))....((((((.......))))))..((((....))))...))))))))))..........)))))).))..)))).))))........	GCCCGGCTAGCTCAGTCGGTAGAGCATGAGACA	Other	33	33T>A	99	61	59	79	70	71	106	112	195	114	123	124	1012.8	916.838	814.793	983.186	425.913	437.432	428.605	570.547	874.569	713.352	803.05	613.13	-1.99926	0.000165713	0.00200004	1.61163	0.00515907	0.131019	-1.24052	0.0449082	0.0873126
AS-tDR-001358	-	-	pre-chr10.trna13312-LysCTT	41	73	TCAGGTCACGTGTAGTAAACTTCGAGCTCAGAGAGCAGTTGCCCGGCTAGCTCAGTCGGTAGAGCATGAGACTCTTAATCTCAGGGTCGTGGGTTCGAGCCCCACGTTGGGCGGCTACACATTTTGGTTTGGACTTCGTGAATCTTAAGGTGT	153	..((((((((.((..((((((....((((...)))).((((((((((..((((........))))....((((((.......))))))..((((....))))...))))))))))..........)))))).))..)))).))))........	GCCCGGCTAGCTCAGTCGGTAGAGCATGAGACT	Other	33	ExactMatch	553	437	435	468	457	451	608	725	1144	662	806	1014	5657.35	6568.17	6007.37	5824.45	2780.6	2778.62	2458.41	3693.27	5130.8	4142.45	5262.26	5013.82	-2.05391	8.7218e-05	0.00124332	1.6691	0.00177493	0.0983473	-1.23055	0.0127558	0.0436369
AS-tDR-001359	-	-	pre-chr10.trna13312-LysCTT	41	74	TCAGGTCACGTGTAGTAAACTTCGAGCTCAGAGAGCAGTTGCCCGGCTAGCTCAGTCGGTAGAGCATGAGACTCTTAATCTCAGGGTCGTGGGTTCGAGCCCCACGTTGGGCGGCTACACATTTTGGTTTGGACTTCGTGAATCTTAAGGTGT	153	..((((((((.((..((((((....((((...)))).((((((((((..((((........))))....((((((.......))))))..((((....))))...))))))))))..........)))))).))..)))).))))........	GCCCGGCTAGCTCAGTCGGTAGAGCATGAGACTC	Other	34	ExactMatch	89	55	70	53	81	91	149	189	156	85	86	82	910.495	826.657	966.704	659.606	492.842	560.652	602.473	962.797	699.655	531.885	561.482	405.457	-1.28394	0.185883	0.23934	-1.19082	0.41951	0.679728	-1.52894	0.0178821	0.0516162
AS-tDR-013630	-	-	pre-chr10.trna13312-LysCTT	41	75	TCAGGTCACGTGTAGTAAACTTCGAGCTCAGAGAGCAGTTGCCCGGCTAGCTCAGTCGGTAGAGCATGAGACTCTTAATCTCAGGGTCGTGGGTTCGAGCCCCACGTTGGGCGGCTACACATTTTGGTTTGGACTTCGTGAATCTTAAGGTGT	153	..((((((((.((..((((((....((((...)))).((((((((((..((((........))))....((((((.......))))))..((((....))))...))))))))))..........)))))).))..)))).))))........	GCCCGGCTAGCTCAGTCGGTAGAGCATGAGACTCA	Other	35	35T>A	60	81	77	105	70	157	402	332	117	64	52	55	613.817	1217.44	1063.37	1306.77	425.913	967.279	1625.46	1691.26	524.741	400.478	339.501	271.953	1.12092	0.718516	0.738923	-3.05965	0.0401003	0.245845	-2.72959	0.00645965	0.0275005
AS-tDR-001360	-	-	pre-chr10.trna13312-LysCTT	41	75	TCAGGTCACGTGTAGTAAACTTCGAGCTCAGAGAGCAGTTGCCCGGCTAGCTCAGTCGGTAGAGCATGAGACTCTTAATCTCAGGGTCGTGGGTTCGAGCCCCACGTTGGGCGGCTACACATTTTGGTTTGGACTTCGTGAATCTTAAGGTGT	153	..((((((((.((..((((((....((((...)))).((((((((((..((((........))))....((((((.......))))))..((((....))))...))))))))))..........)))))).))..)))).))))........	GCCCGGCTAGCTCAGTCGGTAGAGCATGAGACTCT	Other	35	ExactMatch	344	411	357	570	449	889	1985	1755	541	347	327	340	3519.22	6177.39	4930.19	7093.88	2731.92	5477.14	8026.23	8940.26	2426.37	2171.34	2134.94	1681.16	1.15903	0.607992	0.638183	-2.99122	0.0244744	0.245845	-2.5808	0.00566398	0.0262757
AS-tDR-000886	-	-	pre-chr10.trna13312-LysCTT	41	76	TCAGGTCACGTGTAGTAAACTTCGAGCTCAGAGAGCAGTTGCCCGGCTAGCTCAGTCGGTAGAGCATGAGACTCTTAATCTCAGGGTCGTGGGTTCGAGCCCCACGTTGGGCGGCTACACATTTTGGTTTGGACTTCGTGAATCTTAAGGTGT	153	..((((((((.((..((((((....((((...)))).((((((((((..((((........))))....((((((.......))))))..((((....))))...))))))))))..........)))))).))..)))).))))........	GCCCGGCTAGCTCAGTCGGTAGAGCATGAGACTCTT	Other	36	ExactMatch	115	153	118	226	167	384	870	837	249	137	109	98	1176.48	2299.61	1629.59	2812.66	1016.11	2365.83	3517.8	4263.82	1116.76	857.273	711.646	484.57	1.40963	0.347097	0.381028	-3.51817	0.0323639	0.245845	-2.49582	0.0214772	0.0556641
AS-tDR-011146	-	-	pre-chr10.trna13312-LysCTT	41	91	TCAGGTCACGTGTAGTAAACTTCGAGCTCAGAGAGCAGTTGCCCGGCTAGCTCAGTCGGTAGAGCATGAGACTCTTAATCTCAGGGTCGTGGGTTCGAGCCCCACGTTGGGCGGCTACACATTTTGGTTTGGACTTCGTGAATCTTAAGGTGT	153	..((((((((.((..((((((....((((...)))).((((((((((..((((........))))....((((((.......))))))..((((....))))...))))))))))..........)))))).))..)))).))))........	GCCCGGCTAGCTCAGTCGGTAGAGCATGAGACTCTTAATCTCAGGGTCGTG	Other	51	ExactMatch	226	188	255	328	318	194	372	336	102	157	237	127	2312.04	2825.67	3521.56	4082.09	1934.86	1195.24	1504.16	1711.64	457.467	982.423	1547.34	627.964	-2.00718	0.00879673	0.0198741	-1.75451	0.0552359	0.290644	-3.5216	0.0024676	0.0179404
AS-tDR-013631	-	-	pre-chr10.trna13312-LysCTT	42	75	TCAGGTCACGTGTAGTAAACTTCGAGCTCAGAGAGCAGTTGCCCGGCTAGCTCAGTCGGTAGAGCATGAGACTCTTAATCTCAGGGTCGTGGGTTCGAGCCCCACGTTGGGCGGCTACACATTTTGGTTTGGACTTCGTGAATCTTAAGGTGT	153	..((((((((.((..((((((....((((...)))).((((((((((..((((........))))....((((((.......))))))..((((....))))...))))))))))..........)))))).))..)))).))))........	CCCGGCTAGCTCAGTCGGTAGAGCATGAGACTCT	Other	34	ExactMatch	54	56	30	90	0	80	409	69	71	38	0	26	552.435	841.688	414.302	1120.09	0	492.881	1653.77	351.497	318.433	237.784	0	128.559	-1.172	0.792554	0.810506	-3.63274	0.26054	0.570536	-4.25757	0.017029	0.0515523
AS-tDR-003992	-	-	pre-chr10.trna13312-LysCTT	43	75	TCAGGTCACGTGTAGTAAACTTCGAGCTCAGAGAGCAGTTGCCCGGCTAGCTCAGTCGGTAGAGCATGAGACTCTTAATCTCAGGGTCGTGGGTTCGAGCCCCACGTTGGGCGGCTACACATTTTGGTTTGGACTTCGTGAATCTTAAGGTGT	153	..((((((((.((..((((((....((((...)))).((((((((((..((((........))))....((((((.......))))))..((((....))))...))))))))))..........)))))).))..)))).))))........	CCGGCTAGCTCAGTCGGTAGAGCATGAGACTCT	Other	33	ExactMatch	174	240	143	303	76	217	1497	210	231	110	102	109	1780.07	3607.23	1974.84	3770.95	462.419	1336.94	6053.03	1069.77	1036.03	688.322	665.944	538.961	-1.24769	0.704727	0.728843	-3.04309	0.290134	0.596906	-3.79684	0.00871128	0.0330812
AS-tDR-010789	-	-	pre-chr10.trna13312-LysCTT	53	68	TCAGGTCACGTGTAGTAAACTTCGAGCTCAGAGAGCAGTTGCCCGGCTAGCTCAGTCGGTAGAGCATGAGACTCTTAATCTCAGGGTCGTGGGTTCGAGCCCCACGTTGGGCGGCTACACATTTTGGTTTGGACTTCGTGAATCTTAAGGTGT	153	..((((((((.((..((((((....((((...)))).((((((((((..((((........))))....((((((.......))))))..((((....))))...))))))))))..........)))))).))..)))).))))........	CAGTCGGTAGAGCATT	Other	16	16G>T	121	89	110	57	34	76	115	34	114	128	100	66	1237.86	1337.68	1519.11	709.388	206.872	468.237	464.996	173.202	511.286	800.956	652.886	326.343	-3.6499	0.003861	0.0128244	1.74255	0.107069	0.392337	-2.09458	0.0205442	0.0544028
AS-tDR-003930	-	-	pre-chr10.trna13312-LysCTT	54	72	TCAGGTCACGTGTAGTAAACTTCGAGCTCAGAGAGCAGTTGCCCGGCTAGCTCAGTCGGTAGAGCATGAGACTCTTAATCTCAGGGTCGTGGGTTCGAGCCCCACGTTGGGCGGCTACACATTTTGGTTTGGACTTCGTGAATCTTAAGGTGT	153	..((((((((.((..((((((....((((...)))).((((((((((..((((........))))....((((((.......))))))..((((....))))...))))))))))..........)))))).))..)))).))))........	AGTCGGTAGAGCATGAGAC	Other	19	ExactMatch	89	86	83	63	37	94	114	94	172	106	184	143	910.495	1292.59	1146.23	784.06	225.125	579.135	460.952	478.852	771.415	663.292	1201.31	707.077	-2.36684	0.00473886	0.0130917	1.91474	0.0327932	0.245845	-1.23611	0.285778	0.354148
AS-tDR-004117	-	-	pre-chr10.trna13312-LysCTT	56	71	TCAGGTCACGTGTAGTAAACTTCGAGCTCAGAGAGCAGTTGCCCGGCTAGCTCAGTCGGTAGAGCATGAGACTCTTAATCTCAGGGTCGTGGGTTCGAGCCCCACGTTGGGCGGCTACACATTTTGGTTTGGACTTCGTGAATCTTAAGGTGT	153	..((((((((.((..((((((....((((...)))).((((((((((..((((........))))....((((((.......))))))..((((....))))...))))))))))..........)))))).))..)))).))))........	TCGGTAGAGCATGAGA	Other	16	ExactMatch	111	99	80	62	45	77	127	31	141	139	143	121	1135.56	1487.98	1104.8	771.615	273.801	474.398	513.517	157.919	632.381	869.788	933.628	598.296	-3.16371	0.00384386	0.0128244	2.13404	0.0145568	0.245845	-1.4825	0.0729155	0.122825
AS-tDR-004118	-	-	pre-chr10.trna13312-LysCTT	56	72	TCAGGTCACGTGTAGTAAACTTCGAGCTCAGAGAGCAGTTGCCCGGCTAGCTCAGTCGGTAGAGCATGAGACTCTTAATCTCAGGGTCGTGGGTTCGAGCCCCACGTTGGGCGGCTACACATTTTGGTTTGGACTTCGTGAATCTTAAGGTGT	153	..((((((((.((..((((((....((((...)))).((((((((((..((((........))))....((((((.......))))))..((((....))))...))))))))))..........)))))).))..)))).))))........	TCGGTAGAGCATGAGAC	Other	17	ExactMatch	72	59	65	54	42	54	74	0	138	113	117	131	736.58	886.778	897.654	672.051	255.548	332.695	299.215	0	618.926	707.094	763.877	647.742	-3.58634	0.000861108	0.00530147	3.07546	0.00134716	0.0983473	-1.16611	0.127928	0.191186
AS-tDR-007534	-	-	pre-chr10.trna13313-LysCTT	41	73	ACCTTGGTAATCATGATACTCAGCAAGTCAATCGCAGGACGCCCGGCTAGCTCAGTCGGTAGAGCATGAGACTCTTAATCTCAGGGTCGTGGGTTCGAGCCCCACGTTGGGCGAGCTATCATTTTGGTTGGGAGATAACGCTGGCACTTCCCT	153	...................(((((..(((........))).((((((((((((........((((....((((((.......))))))....))))..((((......)))))))))........))))))).......))))).........	GCCCGGCTAGCTCAGTCGGTAGAGCATGAGACA	Other	33	33T>A	99	61	59	79	70	71	106	112	195	114	123	124	1012.8	916.838	814.793	983.186	425.913	437.432	428.605	570.547	874.569	713.352	803.05	613.13	-1.99926	0.000165713	0.00200004	1.61163	0.00515907	0.131019	-1.24052	0.0449082	0.0873126
AS-tDR-001358	-	-	pre-chr10.trna13313-LysCTT	41	73	ACCTTGGTAATCATGATACTCAGCAAGTCAATCGCAGGACGCCCGGCTAGCTCAGTCGGTAGAGCATGAGACTCTTAATCTCAGGGTCGTGGGTTCGAGCCCCACGTTGGGCGAGCTATCATTTTGGTTGGGAGATAACGCTGGCACTTCCCT	153	...................(((((..(((........))).((((((((((((........((((....((((((.......))))))....))))..((((......)))))))))........))))))).......))))).........	GCCCGGCTAGCTCAGTCGGTAGAGCATGAGACT	Other	33	ExactMatch	553	437	435	468	457	451	608	725	1144	662	806	1014	5657.35	6568.17	6007.37	5824.45	2780.6	2778.62	2458.41	3693.27	5130.8	4142.45	5262.26	5013.82	-2.05391	8.7218e-05	0.00124332	1.6691	0.00177493	0.0983473	-1.23055	0.0127558	0.0436369
AS-tDR-001359	-	-	pre-chr10.trna13313-LysCTT	41	74	ACCTTGGTAATCATGATACTCAGCAAGTCAATCGCAGGACGCCCGGCTAGCTCAGTCGGTAGAGCATGAGACTCTTAATCTCAGGGTCGTGGGTTCGAGCCCCACGTTGGGCGAGCTATCATTTTGGTTGGGAGATAACGCTGGCACTTCCCT	153	...................(((((..(((........))).((((((((((((........((((....((((((.......))))))....))))..((((......)))))))))........))))))).......))))).........	GCCCGGCTAGCTCAGTCGGTAGAGCATGAGACTC	Other	34	ExactMatch	89	55	70	53	81	91	149	189	156	85	86	82	910.495	826.657	966.704	659.606	492.842	560.652	602.473	962.797	699.655	531.885	561.482	405.457	-1.28394	0.185883	0.23934	-1.19082	0.41951	0.679728	-1.52894	0.0178821	0.0516162
AS-tDR-013630	-	-	pre-chr10.trna13313-LysCTT	41	75	ACCTTGGTAATCATGATACTCAGCAAGTCAATCGCAGGACGCCCGGCTAGCTCAGTCGGTAGAGCATGAGACTCTTAATCTCAGGGTCGTGGGTTCGAGCCCCACGTTGGGCGAGCTATCATTTTGGTTGGGAGATAACGCTGGCACTTCCCT	153	...................(((((..(((........))).((((((((((((........((((....((((((.......))))))....))))..((((......)))))))))........))))))).......))))).........	GCCCGGCTAGCTCAGTCGGTAGAGCATGAGACTCA	Other	35	35T>A	60	81	77	105	70	157	402	332	117	64	52	55	613.817	1217.44	1063.37	1306.77	425.913	967.279	1625.46	1691.26	524.741	400.478	339.501	271.953	1.12092	0.718516	0.738923	-3.05965	0.0401003	0.245845	-2.72959	0.00645965	0.0275005
AS-tDR-001360	-	-	pre-chr10.trna13313-LysCTT	41	75	ACCTTGGTAATCATGATACTCAGCAAGTCAATCGCAGGACGCCCGGCTAGCTCAGTCGGTAGAGCATGAGACTCTTAATCTCAGGGTCGTGGGTTCGAGCCCCACGTTGGGCGAGCTATCATTTTGGTTGGGAGATAACGCTGGCACTTCCCT	153	...................(((((..(((........))).((((((((((((........((((....((((((.......))))))....))))..((((......)))))))))........))))))).......))))).........	GCCCGGCTAGCTCAGTCGGTAGAGCATGAGACTCT	Other	35	ExactMatch	344	411	357	570	449	889	1985	1755	541	347	327	340	3519.22	6177.39	4930.19	7093.88	2731.92	5477.14	8026.23	8940.26	2426.37	2171.34	2134.94	1681.16	1.15903	0.607992	0.638183	-2.99122	0.0244744	0.245845	-2.5808	0.00566398	0.0262757
AS-tDR-000886	-	-	pre-chr10.trna13313-LysCTT	41	76	ACCTTGGTAATCATGATACTCAGCAAGTCAATCGCAGGACGCCCGGCTAGCTCAGTCGGTAGAGCATGAGACTCTTAATCTCAGGGTCGTGGGTTCGAGCCCCACGTTGGGCGAGCTATCATTTTGGTTGGGAGATAACGCTGGCACTTCCCT	153	...................(((((..(((........))).((((((((((((........((((....((((((.......))))))....))))..((((......)))))))))........))))))).......))))).........	GCCCGGCTAGCTCAGTCGGTAGAGCATGAGACTCTT	Other	36	ExactMatch	115	153	118	226	167	384	870	837	249	137	109	98	1176.48	2299.61	1629.59	2812.66	1016.11	2365.83	3517.8	4263.82	1116.76	857.273	711.646	484.57	1.40963	0.347097	0.381028	-3.51817	0.0323639	0.245845	-2.49582	0.0214772	0.0556641
AS-tDR-011146	-	-	pre-chr10.trna13313-LysCTT	41	91	ACCTTGGTAATCATGATACTCAGCAAGTCAATCGCAGGACGCCCGGCTAGCTCAGTCGGTAGAGCATGAGACTCTTAATCTCAGGGTCGTGGGTTCGAGCCCCACGTTGGGCGAGCTATCATTTTGGTTGGGAGATAACGCTGGCACTTCCCT	153	...................(((((..(((........))).((((((((((((........((((....((((((.......))))))....))))..((((......)))))))))........))))))).......))))).........	GCCCGGCTAGCTCAGTCGGTAGAGCATGAGACTCTTAATCTCAGGGTCGTG	Other	51	ExactMatch	226	188	255	328	318	194	372	336	102	157	237	127	2312.04	2825.67	3521.56	4082.09	1934.86	1195.24	1504.16	1711.64	457.467	982.423	1547.34	627.964	-2.00718	0.00879673	0.0198741	-1.75451	0.0552359	0.290644	-3.5216	0.0024676	0.0179404
AS-tDR-013631	-	-	pre-chr10.trna13313-LysCTT	42	75	ACCTTGGTAATCATGATACTCAGCAAGTCAATCGCAGGACGCCCGGCTAGCTCAGTCGGTAGAGCATGAGACTCTTAATCTCAGGGTCGTGGGTTCGAGCCCCACGTTGGGCGAGCTATCATTTTGGTTGGGAGATAACGCTGGCACTTCCCT	153	...................(((((..(((........))).((((((((((((........((((....((((((.......))))))....))))..((((......)))))))))........))))))).......))))).........	CCCGGCTAGCTCAGTCGGTAGAGCATGAGACTCT	Other	34	ExactMatch	54	56	30	90	0	80	409	69	71	38	0	26	552.435	841.688	414.302	1120.09	0	492.881	1653.77	351.497	318.433	237.784	0	128.559	-1.172	0.792554	0.810506	-3.63274	0.26054	0.570536	-4.25757	0.017029	0.0515523
AS-tDR-003992	-	-	pre-chr10.trna13313-LysCTT	43	75	ACCTTGGTAATCATGATACTCAGCAAGTCAATCGCAGGACGCCCGGCTAGCTCAGTCGGTAGAGCATGAGACTCTTAATCTCAGGGTCGTGGGTTCGAGCCCCACGTTGGGCGAGCTATCATTTTGGTTGGGAGATAACGCTGGCACTTCCCT	153	...................(((((..(((........))).((((((((((((........((((....((((((.......))))))....))))..((((......)))))))))........))))))).......))))).........	CCGGCTAGCTCAGTCGGTAGAGCATGAGACTCT	Other	33	ExactMatch	174	240	143	303	76	217	1497	210	231	110	102	109	1780.07	3607.23	1974.84	3770.95	462.419	1336.94	6053.03	1069.77	1036.03	688.322	665.944	538.961	-1.24769	0.704727	0.728843	-3.04309	0.290134	0.596906	-3.79684	0.00871128	0.0330812
AS-tDR-010789	-	-	pre-chr10.trna13313-LysCTT	53	68	ACCTTGGTAATCATGATACTCAGCAAGTCAATCGCAGGACGCCCGGCTAGCTCAGTCGGTAGAGCATGAGACTCTTAATCTCAGGGTCGTGGGTTCGAGCCCCACGTTGGGCGAGCTATCATTTTGGTTGGGAGATAACGCTGGCACTTCCCT	153	...................(((((..(((........))).((((((((((((........((((....((((((.......))))))....))))..((((......)))))))))........))))))).......))))).........	CAGTCGGTAGAGCATT	Other	16	16G>T	121	89	110	57	34	76	115	34	114	128	100	66	1237.86	1337.68	1519.11	709.388	206.872	468.237	464.996	173.202	511.286	800.956	652.886	326.343	-3.6499	0.003861	0.0128244	1.74255	0.107069	0.392337	-2.09458	0.0205442	0.0544028
AS-tDR-003930	-	-	pre-chr10.trna13313-LysCTT	54	72	ACCTTGGTAATCATGATACTCAGCAAGTCAATCGCAGGACGCCCGGCTAGCTCAGTCGGTAGAGCATGAGACTCTTAATCTCAGGGTCGTGGGTTCGAGCCCCACGTTGGGCGAGCTATCATTTTGGTTGGGAGATAACGCTGGCACTTCCCT	153	...................(((((..(((........))).((((((((((((........((((....((((((.......))))))....))))..((((......)))))))))........))))))).......))))).........	AGTCGGTAGAGCATGAGAC	Other	19	ExactMatch	89	86	83	63	37	94	114	94	172	106	184	143	910.495	1292.59	1146.23	784.06	225.125	579.135	460.952	478.852	771.415	663.292	1201.31	707.077	-2.36684	0.00473886	0.0130917	1.91474	0.0327932	0.245845	-1.23611	0.285778	0.354148
AS-tDR-004117	-	-	pre-chr10.trna13313-LysCTT	56	71	ACCTTGGTAATCATGATACTCAGCAAGTCAATCGCAGGACGCCCGGCTAGCTCAGTCGGTAGAGCATGAGACTCTTAATCTCAGGGTCGTGGGTTCGAGCCCCACGTTGGGCGAGCTATCATTTTGGTTGGGAGATAACGCTGGCACTTCCCT	153	...................(((((..(((........))).((((((((((((........((((....((((((.......))))))....))))..((((......)))))))))........))))))).......))))).........	TCGGTAGAGCATGAGA	Other	16	ExactMatch	111	99	80	62	45	77	127	31	141	139	143	121	1135.56	1487.98	1104.8	771.615	273.801	474.398	513.517	157.919	632.381	869.788	933.628	598.296	-3.16371	0.00384386	0.0128244	2.13404	0.0145568	0.245845	-1.4825	0.0729155	0.122825
AS-tDR-004118	-	-	pre-chr10.trna13313-LysCTT	56	72	ACCTTGGTAATCATGATACTCAGCAAGTCAATCGCAGGACGCCCGGCTAGCTCAGTCGGTAGAGCATGAGACTCTTAATCTCAGGGTCGTGGGTTCGAGCCCCACGTTGGGCGAGCTATCATTTTGGTTGGGAGATAACGCTGGCACTTCCCT	153	...................(((((..(((........))).((((((((((((........((((....((((((.......))))))....))))..((((......)))))))))........))))))).......))))).........	TCGGTAGAGCATGAGAC	Other	17	ExactMatch	72	59	65	54	42	54	74	0	138	113	117	131	736.58	886.778	897.654	672.051	255.548	332.695	299.215	0	618.926	707.094	763.877	647.742	-3.58634	0.000861108	0.00530147	3.07546	0.00134716	0.0983473	-1.16611	0.127928	0.191186
AS-tDR-007534	-	-	pre-chr10.trna465-LysCTT	41	73	GAACTCCAAGAGGCCTGTGGGGAACGGCTTATTTATCGCCGCCCGGCTAGCTCAGTCGGTAGAGCATGAGACTCTTAATCTCAGGGTCGTGGGTTCGAGCCCCACGTTGGGCGGATACTTTTGTGTAAAAGAACTTAACAGAAGTCTGAAAAC	153	((((.(((...((((.((.(((..((((.........))))))).))..((((........)))).(((((.......))))).)))).)))))))..((((......))))....((((((((.............))))))))........	GCCCGGCTAGCTCAGTCGGTAGAGCATGAGACA	Other	33	33T>A	99	61	59	79	70	71	106	112	195	114	123	124	1012.8	916.838	814.793	983.186	425.913	437.432	428.605	570.547	874.569	713.352	803.05	613.13	-1.99926	0.000165713	0.00200004	1.61163	0.00515907	0.131019	-1.24052	0.0449082	0.0873126
AS-tDR-001358	-	-	pre-chr10.trna465-LysCTT	41	73	GAACTCCAAGAGGCCTGTGGGGAACGGCTTATTTATCGCCGCCCGGCTAGCTCAGTCGGTAGAGCATGAGACTCTTAATCTCAGGGTCGTGGGTTCGAGCCCCACGTTGGGCGGATACTTTTGTGTAAAAGAACTTAACAGAAGTCTGAAAAC	153	((((.(((...((((.((.(((..((((.........))))))).))..((((........)))).(((((.......))))).)))).)))))))..((((......))))....((((((((.............))))))))........	GCCCGGCTAGCTCAGTCGGTAGAGCATGAGACT	Other	33	ExactMatch	553	437	435	468	457	451	608	725	1144	662	806	1014	5657.35	6568.17	6007.37	5824.45	2780.6	2778.62	2458.41	3693.27	5130.8	4142.45	5262.26	5013.82	-2.05391	8.7218e-05	0.00124332	1.6691	0.00177493	0.0983473	-1.23055	0.0127558	0.0436369
AS-tDR-001359	-	-	pre-chr10.trna465-LysCTT	41	74	GAACTCCAAGAGGCCTGTGGGGAACGGCTTATTTATCGCCGCCCGGCTAGCTCAGTCGGTAGAGCATGAGACTCTTAATCTCAGGGTCGTGGGTTCGAGCCCCACGTTGGGCGGATACTTTTGTGTAAAAGAACTTAACAGAAGTCTGAAAAC	153	((((.(((...((((.((.(((..((((.........))))))).))..((((........)))).(((((.......))))).)))).)))))))..((((......))))....((((((((.............))))))))........	GCCCGGCTAGCTCAGTCGGTAGAGCATGAGACTC	Other	34	ExactMatch	89	55	70	53	81	91	149	189	156	85	86	82	910.495	826.657	966.704	659.606	492.842	560.652	602.473	962.797	699.655	531.885	561.482	405.457	-1.28394	0.185883	0.23934	-1.19082	0.41951	0.679728	-1.52894	0.0178821	0.0516162
AS-tDR-013630	-	-	pre-chr10.trna465-LysCTT	41	75	GAACTCCAAGAGGCCTGTGGGGAACGGCTTATTTATCGCCGCCCGGCTAGCTCAGTCGGTAGAGCATGAGACTCTTAATCTCAGGGTCGTGGGTTCGAGCCCCACGTTGGGCGGATACTTTTGTGTAAAAGAACTTAACAGAAGTCTGAAAAC	153	((((.(((...((((.((.(((..((((.........))))))).))..((((........)))).(((((.......))))).)))).)))))))..((((......))))....((((((((.............))))))))........	GCCCGGCTAGCTCAGTCGGTAGAGCATGAGACTCA	Other	35	35T>A	60	81	77	105	70	157	402	332	117	64	52	55	613.817	1217.44	1063.37	1306.77	425.913	967.279	1625.46	1691.26	524.741	400.478	339.501	271.953	1.12092	0.718516	0.738923	-3.05965	0.0401003	0.245845	-2.72959	0.00645965	0.0275005
AS-tDR-001360	-	-	pre-chr10.trna465-LysCTT	41	75	GAACTCCAAGAGGCCTGTGGGGAACGGCTTATTTATCGCCGCCCGGCTAGCTCAGTCGGTAGAGCATGAGACTCTTAATCTCAGGGTCGTGGGTTCGAGCCCCACGTTGGGCGGATACTTTTGTGTAAAAGAACTTAACAGAAGTCTGAAAAC	153	((((.(((...((((.((.(((..((((.........))))))).))..((((........)))).(((((.......))))).)))).)))))))..((((......))))....((((((((.............))))))))........	GCCCGGCTAGCTCAGTCGGTAGAGCATGAGACTCT	Other	35	ExactMatch	344	411	357	570	449	889	1985	1755	541	347	327	340	3519.22	6177.39	4930.19	7093.88	2731.92	5477.14	8026.23	8940.26	2426.37	2171.34	2134.94	1681.16	1.15903	0.607992	0.638183	-2.99122	0.0244744	0.245845	-2.5808	0.00566398	0.0262757
AS-tDR-000886	-	-	pre-chr10.trna465-LysCTT	41	76	GAACTCCAAGAGGCCTGTGGGGAACGGCTTATTTATCGCCGCCCGGCTAGCTCAGTCGGTAGAGCATGAGACTCTTAATCTCAGGGTCGTGGGTTCGAGCCCCACGTTGGGCGGATACTTTTGTGTAAAAGAACTTAACAGAAGTCTGAAAAC	153	((((.(((...((((.((.(((..((((.........))))))).))..((((........)))).(((((.......))))).)))).)))))))..((((......))))....((((((((.............))))))))........	GCCCGGCTAGCTCAGTCGGTAGAGCATGAGACTCTT	Other	36	ExactMatch	115	153	118	226	167	384	870	837	249	137	109	98	1176.48	2299.61	1629.59	2812.66	1016.11	2365.83	3517.8	4263.82	1116.76	857.273	711.646	484.57	1.40963	0.347097	0.381028	-3.51817	0.0323639	0.245845	-2.49582	0.0214772	0.0556641
AS-tDR-011146	-	-	pre-chr10.trna465-LysCTT	41	91	GAACTCCAAGAGGCCTGTGGGGAACGGCTTATTTATCGCCGCCCGGCTAGCTCAGTCGGTAGAGCATGAGACTCTTAATCTCAGGGTCGTGGGTTCGAGCCCCACGTTGGGCGGATACTTTTGTGTAAAAGAACTTAACAGAAGTCTGAAAAC	153	((((.(((...((((.((.(((..((((.........))))))).))..((((........)))).(((((.......))))).)))).)))))))..((((......))))....((((((((.............))))))))........	GCCCGGCTAGCTCAGTCGGTAGAGCATGAGACTCTTAATCTCAGGGTCGTG	Other	51	ExactMatch	226	188	255	328	318	194	372	336	102	157	237	127	2312.04	2825.67	3521.56	4082.09	1934.86	1195.24	1504.16	1711.64	457.467	982.423	1547.34	627.964	-2.00718	0.00879673	0.0198741	-1.75451	0.0552359	0.290644	-3.5216	0.0024676	0.0179404
AS-tDR-013631	-	-	pre-chr10.trna465-LysCTT	42	75	GAACTCCAAGAGGCCTGTGGGGAACGGCTTATTTATCGCCGCCCGGCTAGCTCAGTCGGTAGAGCATGAGACTCTTAATCTCAGGGTCGTGGGTTCGAGCCCCACGTTGGGCGGATACTTTTGTGTAAAAGAACTTAACAGAAGTCTGAAAAC	153	((((.(((...((((.((.(((..((((.........))))))).))..((((........)))).(((((.......))))).)))).)))))))..((((......))))....((((((((.............))))))))........	CCCGGCTAGCTCAGTCGGTAGAGCATGAGACTCT	Other	34	ExactMatch	54	56	30	90	0	80	409	69	71	38	0	26	552.435	841.688	414.302	1120.09	0	492.881	1653.77	351.497	318.433	237.784	0	128.559	-1.172	0.792554	0.810506	-3.63274	0.26054	0.570536	-4.25757	0.017029	0.0515523
AS-tDR-003992	-	-	pre-chr10.trna465-LysCTT	43	75	GAACTCCAAGAGGCCTGTGGGGAACGGCTTATTTATCGCCGCCCGGCTAGCTCAGTCGGTAGAGCATGAGACTCTTAATCTCAGGGTCGTGGGTTCGAGCCCCACGTTGGGCGGATACTTTTGTGTAAAAGAACTTAACAGAAGTCTGAAAAC	153	((((.(((...((((.((.(((..((((.........))))))).))..((((........)))).(((((.......))))).)))).)))))))..((((......))))....((((((((.............))))))))........	CCGGCTAGCTCAGTCGGTAGAGCATGAGACTCT	Other	33	ExactMatch	174	240	143	303	76	217	1497	210	231	110	102	109	1780.07	3607.23	1974.84	3770.95	462.419	1336.94	6053.03	1069.77	1036.03	688.322	665.944	538.961	-1.24769	0.704727	0.728843	-3.04309	0.290134	0.596906	-3.79684	0.00871128	0.0330812
AS-tDR-010789	-	-	pre-chr10.trna465-LysCTT	53	68	GAACTCCAAGAGGCCTGTGGGGAACGGCTTATTTATCGCCGCCCGGCTAGCTCAGTCGGTAGAGCATGAGACTCTTAATCTCAGGGTCGTGGGTTCGAGCCCCACGTTGGGCGGATACTTTTGTGTAAAAGAACTTAACAGAAGTCTGAAAAC	153	((((.(((...((((.((.(((..((((.........))))))).))..((((........)))).(((((.......))))).)))).)))))))..((((......))))....((((((((.............))))))))........	CAGTCGGTAGAGCATT	Other	16	16G>T	121	89	110	57	34	76	115	34	114	128	100	66	1237.86	1337.68	1519.11	709.388	206.872	468.237	464.996	173.202	511.286	800.956	652.886	326.343	-3.6499	0.003861	0.0128244	1.74255	0.107069	0.392337	-2.09458	0.0205442	0.0544028
AS-tDR-003930	-	-	pre-chr10.trna465-LysCTT	54	72	GAACTCCAAGAGGCCTGTGGGGAACGGCTTATTTATCGCCGCCCGGCTAGCTCAGTCGGTAGAGCATGAGACTCTTAATCTCAGGGTCGTGGGTTCGAGCCCCACGTTGGGCGGATACTTTTGTGTAAAAGAACTTAACAGAAGTCTGAAAAC	153	((((.(((...((((.((.(((..((((.........))))))).))..((((........)))).(((((.......))))).)))).)))))))..((((......))))....((((((((.............))))))))........	AGTCGGTAGAGCATGAGAC	Other	19	ExactMatch	89	86	83	63	37	94	114	94	172	106	184	143	910.495	1292.59	1146.23	784.06	225.125	579.135	460.952	478.852	771.415	663.292	1201.31	707.077	-2.36684	0.00473886	0.0130917	1.91474	0.0327932	0.245845	-1.23611	0.285778	0.354148
AS-tDR-004117	-	-	pre-chr10.trna465-LysCTT	56	71	GAACTCCAAGAGGCCTGTGGGGAACGGCTTATTTATCGCCGCCCGGCTAGCTCAGTCGGTAGAGCATGAGACTCTTAATCTCAGGGTCGTGGGTTCGAGCCCCACGTTGGGCGGATACTTTTGTGTAAAAGAACTTAACAGAAGTCTGAAAAC	153	((((.(((...((((.((.(((..((((.........))))))).))..((((........)))).(((((.......))))).)))).)))))))..((((......))))....((((((((.............))))))))........	TCGGTAGAGCATGAGA	Other	16	ExactMatch	111	99	80	62	45	77	127	31	141	139	143	121	1135.56	1487.98	1104.8	771.615	273.801	474.398	513.517	157.919	632.381	869.788	933.628	598.296	-3.16371	0.00384386	0.0128244	2.13404	0.0145568	0.245845	-1.4825	0.0729155	0.122825
AS-tDR-004118	-	-	pre-chr10.trna465-LysCTT	56	72	GAACTCCAAGAGGCCTGTGGGGAACGGCTTATTTATCGCCGCCCGGCTAGCTCAGTCGGTAGAGCATGAGACTCTTAATCTCAGGGTCGTGGGTTCGAGCCCCACGTTGGGCGGATACTTTTGTGTAAAAGAACTTAACAGAAGTCTGAAAAC	153	((((.(((...((((.((.(((..((((.........))))))).))..((((........)))).(((((.......))))).)))).)))))))..((((......))))....((((((((.............))))))))........	TCGGTAGAGCATGAGAC	Other	17	ExactMatch	72	59	65	54	42	54	74	0	138	113	117	131	736.58	886.778	897.654	672.051	255.548	332.695	299.215	0	618.926	707.094	763.877	647.742	-3.58634	0.000861108	0.00530147	3.07546	0.00134716	0.0983473	-1.16611	0.127928	0.191186
AS-tDR-007534	-	-	pre-chr2.trna4376-LysCTT	41	73	CCGGTTTAAAGTGTTTCAGAAAAATGCAGCTCACAGGAGCGCCCGGCTAGCTCAGTCGGTAGAGCATGAGACTCTTAATCTCAGGGTCGTGGGTTCGAGCCCCACGTTGGGCGCATGCTTTTAATCCTGGAAAGATGGTTCTGTGACTAACAC	153	..........(((((.(((((..((.(...((.((((((((((((((..((((........))))....((((((.......))))))..((((....))))...)))))))))..........)))))))..)))..))))).....)))))	GCCCGGCTAGCTCAGTCGGTAGAGCATGAGACA	Other	33	33T>A	99	61	59	79	70	71	106	112	195	114	123	124	1012.8	916.838	814.793	983.186	425.913	437.432	428.605	570.547	874.569	713.352	803.05	613.13	-1.99926	0.000165713	0.00200004	1.61163	0.00515907	0.131019	-1.24052	0.0449082	0.0873126
AS-tDR-001358	-	-	pre-chr2.trna4376-LysCTT	41	73	CCGGTTTAAAGTGTTTCAGAAAAATGCAGCTCACAGGAGCGCCCGGCTAGCTCAGTCGGTAGAGCATGAGACTCTTAATCTCAGGGTCGTGGGTTCGAGCCCCACGTTGGGCGCATGCTTTTAATCCTGGAAAGATGGTTCTGTGACTAACAC	153	..........(((((.(((((..((.(...((.((((((((((((((..((((........))))....((((((.......))))))..((((....))))...)))))))))..........)))))))..)))..))))).....)))))	GCCCGGCTAGCTCAGTCGGTAGAGCATGAGACT	Other	33	ExactMatch	553	437	435	468	457	451	608	725	1144	662	806	1014	5657.35	6568.17	6007.37	5824.45	2780.6	2778.62	2458.41	3693.27	5130.8	4142.45	5262.26	5013.82	-2.05391	8.7218e-05	0.00124332	1.6691	0.00177493	0.0983473	-1.23055	0.0127558	0.0436369
AS-tDR-001359	-	-	pre-chr2.trna4376-LysCTT	41	74	CCGGTTTAAAGTGTTTCAGAAAAATGCAGCTCACAGGAGCGCCCGGCTAGCTCAGTCGGTAGAGCATGAGACTCTTAATCTCAGGGTCGTGGGTTCGAGCCCCACGTTGGGCGCATGCTTTTAATCCTGGAAAGATGGTTCTGTGACTAACAC	153	..........(((((.(((((..((.(...((.((((((((((((((..((((........))))....((((((.......))))))..((((....))))...)))))))))..........)))))))..)))..))))).....)))))	GCCCGGCTAGCTCAGTCGGTAGAGCATGAGACTC	Other	34	ExactMatch	89	55	70	53	81	91	149	189	156	85	86	82	910.495	826.657	966.704	659.606	492.842	560.652	602.473	962.797	699.655	531.885	561.482	405.457	-1.28394	0.185883	0.23934	-1.19082	0.41951	0.679728	-1.52894	0.0178821	0.0516162
AS-tDR-013630	-	-	pre-chr2.trna4376-LysCTT	41	75	CCGGTTTAAAGTGTTTCAGAAAAATGCAGCTCACAGGAGCGCCCGGCTAGCTCAGTCGGTAGAGCATGAGACTCTTAATCTCAGGGTCGTGGGTTCGAGCCCCACGTTGGGCGCATGCTTTTAATCCTGGAAAGATGGTTCTGTGACTAACAC	153	..........(((((.(((((..((.(...((.((((((((((((((..((((........))))....((((((.......))))))..((((....))))...)))))))))..........)))))))..)))..))))).....)))))	GCCCGGCTAGCTCAGTCGGTAGAGCATGAGACTCA	Other	35	35T>A	60	81	77	105	70	157	402	332	117	64	52	55	613.817	1217.44	1063.37	1306.77	425.913	967.279	1625.46	1691.26	524.741	400.478	339.501	271.953	1.12092	0.718516	0.738923	-3.05965	0.0401003	0.245845	-2.72959	0.00645965	0.0275005
AS-tDR-001360	-	-	pre-chr2.trna4376-LysCTT	41	75	CCGGTTTAAAGTGTTTCAGAAAAATGCAGCTCACAGGAGCGCCCGGCTAGCTCAGTCGGTAGAGCATGAGACTCTTAATCTCAGGGTCGTGGGTTCGAGCCCCACGTTGGGCGCATGCTTTTAATCCTGGAAAGATGGTTCTGTGACTAACAC	153	..........(((((.(((((..((.(...((.((((((((((((((..((((........))))....((((((.......))))))..((((....))))...)))))))))..........)))))))..)))..))))).....)))))	GCCCGGCTAGCTCAGTCGGTAGAGCATGAGACTCT	Other	35	ExactMatch	344	411	357	570	449	889	1985	1755	541	347	327	340	3519.22	6177.39	4930.19	7093.88	2731.92	5477.14	8026.23	8940.26	2426.37	2171.34	2134.94	1681.16	1.15903	0.607992	0.638183	-2.99122	0.0244744	0.245845	-2.5808	0.00566398	0.0262757
AS-tDR-000886	-	-	pre-chr2.trna4376-LysCTT	41	76	CCGGTTTAAAGTGTTTCAGAAAAATGCAGCTCACAGGAGCGCCCGGCTAGCTCAGTCGGTAGAGCATGAGACTCTTAATCTCAGGGTCGTGGGTTCGAGCCCCACGTTGGGCGCATGCTTTTAATCCTGGAAAGATGGTTCTGTGACTAACAC	153	..........(((((.(((((..((.(...((.((((((((((((((..((((........))))....((((((.......))))))..((((....))))...)))))))))..........)))))))..)))..))))).....)))))	GCCCGGCTAGCTCAGTCGGTAGAGCATGAGACTCTT	Other	36	ExactMatch	115	153	118	226	167	384	870	837	249	137	109	98	1176.48	2299.61	1629.59	2812.66	1016.11	2365.83	3517.8	4263.82	1116.76	857.273	711.646	484.57	1.40963	0.347097	0.381028	-3.51817	0.0323639	0.245845	-2.49582	0.0214772	0.0556641
AS-tDR-011146	-	-	pre-chr2.trna4376-LysCTT	41	91	CCGGTTTAAAGTGTTTCAGAAAAATGCAGCTCACAGGAGCGCCCGGCTAGCTCAGTCGGTAGAGCATGAGACTCTTAATCTCAGGGTCGTGGGTTCGAGCCCCACGTTGGGCGCATGCTTTTAATCCTGGAAAGATGGTTCTGTGACTAACAC	153	..........(((((.(((((..((.(...((.((((((((((((((..((((........))))....((((((.......))))))..((((....))))...)))))))))..........)))))))..)))..))))).....)))))	GCCCGGCTAGCTCAGTCGGTAGAGCATGAGACTCTTAATCTCAGGGTCGTG	Other	51	ExactMatch	226	188	255	328	318	194	372	336	102	157	237	127	2312.04	2825.67	3521.56	4082.09	1934.86	1195.24	1504.16	1711.64	457.467	982.423	1547.34	627.964	-2.00718	0.00879673	0.0198741	-1.75451	0.0552359	0.290644	-3.5216	0.0024676	0.0179404
AS-tDR-013631	-	-	pre-chr2.trna4376-LysCTT	42	75	CCGGTTTAAAGTGTTTCAGAAAAATGCAGCTCACAGGAGCGCCCGGCTAGCTCAGTCGGTAGAGCATGAGACTCTTAATCTCAGGGTCGTGGGTTCGAGCCCCACGTTGGGCGCATGCTTTTAATCCTGGAAAGATGGTTCTGTGACTAACAC	153	..........(((((.(((((..((.(...((.((((((((((((((..((((........))))....((((((.......))))))..((((....))))...)))))))))..........)))))))..)))..))))).....)))))	CCCGGCTAGCTCAGTCGGTAGAGCATGAGACTCT	Other	34	ExactMatch	54	56	30	90	0	80	409	69	71	38	0	26	552.435	841.688	414.302	1120.09	0	492.881	1653.77	351.497	318.433	237.784	0	128.559	-1.172	0.792554	0.810506	-3.63274	0.26054	0.570536	-4.25757	0.017029	0.0515523
AS-tDR-003992	-	-	pre-chr2.trna4376-LysCTT	43	75	CCGGTTTAAAGTGTTTCAGAAAAATGCAGCTCACAGGAGCGCCCGGCTAGCTCAGTCGGTAGAGCATGAGACTCTTAATCTCAGGGTCGTGGGTTCGAGCCCCACGTTGGGCGCATGCTTTTAATCCTGGAAAGATGGTTCTGTGACTAACAC	153	..........(((((.(((((..((.(...((.((((((((((((((..((((........))))....((((((.......))))))..((((....))))...)))))))))..........)))))))..)))..))))).....)))))	CCGGCTAGCTCAGTCGGTAGAGCATGAGACTCT	Other	33	ExactMatch	174	240	143	303	76	217	1497	210	231	110	102	109	1780.07	3607.23	1974.84	3770.95	462.419	1336.94	6053.03	1069.77	1036.03	688.322	665.944	538.961	-1.24769	0.704727	0.728843	-3.04309	0.290134	0.596906	-3.79684	0.00871128	0.0330812
AS-tDR-010789	-	-	pre-chr2.trna4376-LysCTT	53	68	CCGGTTTAAAGTGTTTCAGAAAAATGCAGCTCACAGGAGCGCCCGGCTAGCTCAGTCGGTAGAGCATGAGACTCTTAATCTCAGGGTCGTGGGTTCGAGCCCCACGTTGGGCGCATGCTTTTAATCCTGGAAAGATGGTTCTGTGACTAACAC	153	..........(((((.(((((..((.(...((.((((((((((((((..((((........))))....((((((.......))))))..((((....))))...)))))))))..........)))))))..)))..))))).....)))))	CAGTCGGTAGAGCATT	Other	16	16G>T	121	89	110	57	34	76	115	34	114	128	100	66	1237.86	1337.68	1519.11	709.388	206.872	468.237	464.996	173.202	511.286	800.956	652.886	326.343	-3.6499	0.003861	0.0128244	1.74255	0.107069	0.392337	-2.09458	0.0205442	0.0544028
AS-tDR-003930	-	-	pre-chr2.trna4376-LysCTT	54	72	CCGGTTTAAAGTGTTTCAGAAAAATGCAGCTCACAGGAGCGCCCGGCTAGCTCAGTCGGTAGAGCATGAGACTCTTAATCTCAGGGTCGTGGGTTCGAGCCCCACGTTGGGCGCATGCTTTTAATCCTGGAAAGATGGTTCTGTGACTAACAC	153	..........(((((.(((((..((.(...((.((((((((((((((..((((........))))....((((((.......))))))..((((....))))...)))))))))..........)))))))..)))..))))).....)))))	AGTCGGTAGAGCATGAGAC	Other	19	ExactMatch	89	86	83	63	37	94	114	94	172	106	184	143	910.495	1292.59	1146.23	784.06	225.125	579.135	460.952	478.852	771.415	663.292	1201.31	707.077	-2.36684	0.00473886	0.0130917	1.91474	0.0327932	0.245845	-1.23611	0.285778	0.354148
AS-tDR-004117	-	-	pre-chr2.trna4376-LysCTT	56	71	CCGGTTTAAAGTGTTTCAGAAAAATGCAGCTCACAGGAGCGCCCGGCTAGCTCAGTCGGTAGAGCATGAGACTCTTAATCTCAGGGTCGTGGGTTCGAGCCCCACGTTGGGCGCATGCTTTTAATCCTGGAAAGATGGTTCTGTGACTAACAC	153	..........(((((.(((((..((.(...((.((((((((((((((..((((........))))....((((((.......))))))..((((....))))...)))))))))..........)))))))..)))..))))).....)))))	TCGGTAGAGCATGAGA	Other	16	ExactMatch	111	99	80	62	45	77	127	31	141	139	143	121	1135.56	1487.98	1104.8	771.615	273.801	474.398	513.517	157.919	632.381	869.788	933.628	598.296	-3.16371	0.00384386	0.0128244	2.13404	0.0145568	0.245845	-1.4825	0.0729155	0.122825
AS-tDR-004118	-	-	pre-chr2.trna4376-LysCTT	56	72	CCGGTTTAAAGTGTTTCAGAAAAATGCAGCTCACAGGAGCGCCCGGCTAGCTCAGTCGGTAGAGCATGAGACTCTTAATCTCAGGGTCGTGGGTTCGAGCCCCACGTTGGGCGCATGCTTTTAATCCTGGAAAGATGGTTCTGTGACTAACAC	153	..........(((((.(((((..((.(...((.((((((((((((((..((((........))))....((((((.......))))))..((((....))))...)))))))))..........)))))))..)))..))))).....)))))	TCGGTAGAGCATGAGAC	Other	17	ExactMatch	72	59	65	54	42	54	74	0	138	113	117	131	736.58	886.778	897.654	672.051	255.548	332.695	299.215	0	618.926	707.094	763.877	647.742	-3.58634	0.000861108	0.00530147	3.07546	0.00134716	0.0983473	-1.16611	0.127928	0.191186
AS-tDR-007534	-	-	pre-chr2.trna7564-LysCTT	41	73	ACACATACTATAAACACCTAGGAAGAGCCAGACCTACAGAGCCCGGCTAGCTCAGTCGGTAGAGCATGAGACTCTTAATCTCAGGGTCGTGGGTTCGAGCCCCACGTTGGGCGCTTCCCTTTTACTATTTTTTTTTTTTTTTTAAAAACCCTA	153	....................(((((.(((.(((((.....((((((((.....))))))....))..((((.......)))).)))))(((((.......)))))....))).)))))...................................	GCCCGGCTAGCTCAGTCGGTAGAGCATGAGACA	Other	33	33T>A	99	61	59	79	70	71	106	112	195	114	123	124	1012.8	916.838	814.793	983.186	425.913	437.432	428.605	570.547	874.569	713.352	803.05	613.13	-1.99926	0.000165713	0.00200004	1.61163	0.00515907	0.131019	-1.24052	0.0449082	0.0873126
AS-tDR-001358	-	-	pre-chr2.trna7564-LysCTT	41	73	ACACATACTATAAACACCTAGGAAGAGCCAGACCTACAGAGCCCGGCTAGCTCAGTCGGTAGAGCATGAGACTCTTAATCTCAGGGTCGTGGGTTCGAGCCCCACGTTGGGCGCTTCCCTTTTACTATTTTTTTTTTTTTTTTAAAAACCCTA	153	....................(((((.(((.(((((.....((((((((.....))))))....))..((((.......)))).)))))(((((.......)))))....))).)))))...................................	GCCCGGCTAGCTCAGTCGGTAGAGCATGAGACT	Other	33	ExactMatch	553	437	435	468	457	451	608	725	1144	662	806	1014	5657.35	6568.17	6007.37	5824.45	2780.6	2778.62	2458.41	3693.27	5130.8	4142.45	5262.26	5013.82	-2.05391	8.7218e-05	0.00124332	1.6691	0.00177493	0.0983473	-1.23055	0.0127558	0.0436369
AS-tDR-001359	-	-	pre-chr2.trna7564-LysCTT	41	74	ACACATACTATAAACACCTAGGAAGAGCCAGACCTACAGAGCCCGGCTAGCTCAGTCGGTAGAGCATGAGACTCTTAATCTCAGGGTCGTGGGTTCGAGCCCCACGTTGGGCGCTTCCCTTTTACTATTTTTTTTTTTTTTTTAAAAACCCTA	153	....................(((((.(((.(((((.....((((((((.....))))))....))..((((.......)))).)))))(((((.......)))))....))).)))))...................................	GCCCGGCTAGCTCAGTCGGTAGAGCATGAGACTC	Other	34	ExactMatch	89	55	70	53	81	91	149	189	156	85	86	82	910.495	826.657	966.704	659.606	492.842	560.652	602.473	962.797	699.655	531.885	561.482	405.457	-1.28394	0.185883	0.23934	-1.19082	0.41951	0.679728	-1.52894	0.0178821	0.0516162
AS-tDR-013630	-	-	pre-chr2.trna7564-LysCTT	41	75	ACACATACTATAAACACCTAGGAAGAGCCAGACCTACAGAGCCCGGCTAGCTCAGTCGGTAGAGCATGAGACTCTTAATCTCAGGGTCGTGGGTTCGAGCCCCACGTTGGGCGCTTCCCTTTTACTATTTTTTTTTTTTTTTTAAAAACCCTA	153	....................(((((.(((.(((((.....((((((((.....))))))....))..((((.......)))).)))))(((((.......)))))....))).)))))...................................	GCCCGGCTAGCTCAGTCGGTAGAGCATGAGACTCA	Other	35	35T>A	60	81	77	105	70	157	402	332	117	64	52	55	613.817	1217.44	1063.37	1306.77	425.913	967.279	1625.46	1691.26	524.741	400.478	339.501	271.953	1.12092	0.718516	0.738923	-3.05965	0.0401003	0.245845	-2.72959	0.00645965	0.0275005
AS-tDR-001360	-	-	pre-chr2.trna7564-LysCTT	41	75	ACACATACTATAAACACCTAGGAAGAGCCAGACCTACAGAGCCCGGCTAGCTCAGTCGGTAGAGCATGAGACTCTTAATCTCAGGGTCGTGGGTTCGAGCCCCACGTTGGGCGCTTCCCTTTTACTATTTTTTTTTTTTTTTTAAAAACCCTA	153	....................(((((.(((.(((((.....((((((((.....))))))....))..((((.......)))).)))))(((((.......)))))....))).)))))...................................	GCCCGGCTAGCTCAGTCGGTAGAGCATGAGACTCT	Other	35	ExactMatch	344	411	357	570	449	889	1985	1755	541	347	327	340	3519.22	6177.39	4930.19	7093.88	2731.92	5477.14	8026.23	8940.26	2426.37	2171.34	2134.94	1681.16	1.15903	0.607992	0.638183	-2.99122	0.0244744	0.245845	-2.5808	0.00566398	0.0262757
AS-tDR-000886	-	-	pre-chr2.trna7564-LysCTT	41	76	ACACATACTATAAACACCTAGGAAGAGCCAGACCTACAGAGCCCGGCTAGCTCAGTCGGTAGAGCATGAGACTCTTAATCTCAGGGTCGTGGGTTCGAGCCCCACGTTGGGCGCTTCCCTTTTACTATTTTTTTTTTTTTTTTAAAAACCCTA	153	....................(((((.(((.(((((.....((((((((.....))))))....))..((((.......)))).)))))(((((.......)))))....))).)))))...................................	GCCCGGCTAGCTCAGTCGGTAGAGCATGAGACTCTT	Other	36	ExactMatch	115	153	118	226	167	384	870	837	249	137	109	98	1176.48	2299.61	1629.59	2812.66	1016.11	2365.83	3517.8	4263.82	1116.76	857.273	711.646	484.57	1.40963	0.347097	0.381028	-3.51817	0.0323639	0.245845	-2.49582	0.0214772	0.0556641
AS-tDR-011146	-	-	pre-chr2.trna7564-LysCTT	41	91	ACACATACTATAAACACCTAGGAAGAGCCAGACCTACAGAGCCCGGCTAGCTCAGTCGGTAGAGCATGAGACTCTTAATCTCAGGGTCGTGGGTTCGAGCCCCACGTTGGGCGCTTCCCTTTTACTATTTTTTTTTTTTTTTTAAAAACCCTA	153	....................(((((.(((.(((((.....((((((((.....))))))....))..((((.......)))).)))))(((((.......)))))....))).)))))...................................	GCCCGGCTAGCTCAGTCGGTAGAGCATGAGACTCTTAATCTCAGGGTCGTG	Other	51	ExactMatch	226	188	255	328	318	194	372	336	102	157	237	127	2312.04	2825.67	3521.56	4082.09	1934.86	1195.24	1504.16	1711.64	457.467	982.423	1547.34	627.964	-2.00718	0.00879673	0.0198741	-1.75451	0.0552359	0.290644	-3.5216	0.0024676	0.0179404
AS-tDR-013631	-	-	pre-chr2.trna7564-LysCTT	42	75	ACACATACTATAAACACCTAGGAAGAGCCAGACCTACAGAGCCCGGCTAGCTCAGTCGGTAGAGCATGAGACTCTTAATCTCAGGGTCGTGGGTTCGAGCCCCACGTTGGGCGCTTCCCTTTTACTATTTTTTTTTTTTTTTTAAAAACCCTA	153	....................(((((.(((.(((((.....((((((((.....))))))....))..((((.......)))).)))))(((((.......)))))....))).)))))...................................	CCCGGCTAGCTCAGTCGGTAGAGCATGAGACTCT	Other	34	ExactMatch	54	56	30	90	0	80	409	69	71	38	0	26	552.435	841.688	414.302	1120.09	0	492.881	1653.77	351.497	318.433	237.784	0	128.559	-1.172	0.792554	0.810506	-3.63274	0.26054	0.570536	-4.25757	0.017029	0.0515523
AS-tDR-003992	-	-	pre-chr2.trna7564-LysCTT	43	75	ACACATACTATAAACACCTAGGAAGAGCCAGACCTACAGAGCCCGGCTAGCTCAGTCGGTAGAGCATGAGACTCTTAATCTCAGGGTCGTGGGTTCGAGCCCCACGTTGGGCGCTTCCCTTTTACTATTTTTTTTTTTTTTTTAAAAACCCTA	153	....................(((((.(((.(((((.....((((((((.....))))))....))..((((.......)))).)))))(((((.......)))))....))).)))))...................................	CCGGCTAGCTCAGTCGGTAGAGCATGAGACTCT	Other	33	ExactMatch	174	240	143	303	76	217	1497	210	231	110	102	109	1780.07	3607.23	1974.84	3770.95	462.419	1336.94	6053.03	1069.77	1036.03	688.322	665.944	538.961	-1.24769	0.704727	0.728843	-3.04309	0.290134	0.596906	-3.79684	0.00871128	0.0330812
AS-tDR-010789	-	-	pre-chr2.trna7564-LysCTT	53	68	ACACATACTATAAACACCTAGGAAGAGCCAGACCTACAGAGCCCGGCTAGCTCAGTCGGTAGAGCATGAGACTCTTAATCTCAGGGTCGTGGGTTCGAGCCCCACGTTGGGCGCTTCCCTTTTACTATTTTTTTTTTTTTTTTAAAAACCCTA	153	....................(((((.(((.(((((.....((((((((.....))))))....))..((((.......)))).)))))(((((.......)))))....))).)))))...................................	CAGTCGGTAGAGCATT	Other	16	16G>T	121	89	110	57	34	76	115	34	114	128	100	66	1237.86	1337.68	1519.11	709.388	206.872	468.237	464.996	173.202	511.286	800.956	652.886	326.343	-3.6499	0.003861	0.0128244	1.74255	0.107069	0.392337	-2.09458	0.0205442	0.0544028
AS-tDR-003930	-	-	pre-chr2.trna7564-LysCTT	54	72	ACACATACTATAAACACCTAGGAAGAGCCAGACCTACAGAGCCCGGCTAGCTCAGTCGGTAGAGCATGAGACTCTTAATCTCAGGGTCGTGGGTTCGAGCCCCACGTTGGGCGCTTCCCTTTTACTATTTTTTTTTTTTTTTTAAAAACCCTA	153	....................(((((.(((.(((((.....((((((((.....))))))....))..((((.......)))).)))))(((((.......)))))....))).)))))...................................	AGTCGGTAGAGCATGAGAC	Other	19	ExactMatch	89	86	83	63	37	94	114	94	172	106	184	143	910.495	1292.59	1146.23	784.06	225.125	579.135	460.952	478.852	771.415	663.292	1201.31	707.077	-2.36684	0.00473886	0.0130917	1.91474	0.0327932	0.245845	-1.23611	0.285778	0.354148
AS-tDR-004117	-	-	pre-chr2.trna7564-LysCTT	56	71	ACACATACTATAAACACCTAGGAAGAGCCAGACCTACAGAGCCCGGCTAGCTCAGTCGGTAGAGCATGAGACTCTTAATCTCAGGGTCGTGGGTTCGAGCCCCACGTTGGGCGCTTCCCTTTTACTATTTTTTTTTTTTTTTTAAAAACCCTA	153	....................(((((.(((.(((((.....((((((((.....))))))....))..((((.......)))).)))))(((((.......)))))....))).)))))...................................	TCGGTAGAGCATGAGA	Other	16	ExactMatch	111	99	80	62	45	77	127	31	141	139	143	121	1135.56	1487.98	1104.8	771.615	273.801	474.398	513.517	157.919	632.381	869.788	933.628	598.296	-3.16371	0.00384386	0.0128244	2.13404	0.0145568	0.245845	-1.4825	0.0729155	0.122825
AS-tDR-004118	-	-	pre-chr2.trna7564-LysCTT	56	72	ACACATACTATAAACACCTAGGAAGAGCCAGACCTACAGAGCCCGGCTAGCTCAGTCGGTAGAGCATGAGACTCTTAATCTCAGGGTCGTGGGTTCGAGCCCCACGTTGGGCGCTTCCCTTTTACTATTTTTTTTTTTTTTTTAAAAACCCTA	153	....................(((((.(((.(((((.....((((((((.....))))))....))..((((.......)))).)))))(((((.......)))))....))).)))))...................................	TCGGTAGAGCATGAGAC	Other	17	ExactMatch	72	59	65	54	42	54	74	0	138	113	117	131	736.58	886.778	897.654	672.051	255.548	332.695	299.215	0	618.926	707.094	763.877	647.742	-3.58634	0.000861108	0.00530147	3.07546	0.00134716	0.0983473	-1.16611	0.127928	0.191186
AS-tDR-007534	-	-	pre-chr2.trna7568-LysCTT	41	73	ACACATACTATAAACACCTAGGAAGAGCCAGACCTACAGAGCCCGGCTAGCTCAGTCGGTAGAGCATGAGACTCTTAATCTCAGGGTCGTGGGTTCGAGCCCCACGTTGGGCGCTTCCCTTTTACTATTTTTTTTTTTTTTTTAAAAACCCTA	153	....................(((((.(((.(((((.....((((((((.....))))))....))..((((.......)))).)))))(((((.......)))))....))).)))))...................................	GCCCGGCTAGCTCAGTCGGTAGAGCATGAGACA	Other	33	33T>A	99	61	59	79	70	71	106	112	195	114	123	124	1012.8	916.838	814.793	983.186	425.913	437.432	428.605	570.547	874.569	713.352	803.05	613.13	-1.99926	0.000165713	0.00200004	1.61163	0.00515907	0.131019	-1.24052	0.0449082	0.0873126
AS-tDR-001358	-	-	pre-chr2.trna7568-LysCTT	41	73	ACACATACTATAAACACCTAGGAAGAGCCAGACCTACAGAGCCCGGCTAGCTCAGTCGGTAGAGCATGAGACTCTTAATCTCAGGGTCGTGGGTTCGAGCCCCACGTTGGGCGCTTCCCTTTTACTATTTTTTTTTTTTTTTTAAAAACCCTA	153	....................(((((.(((.(((((.....((((((((.....))))))....))..((((.......)))).)))))(((((.......)))))....))).)))))...................................	GCCCGGCTAGCTCAGTCGGTAGAGCATGAGACT	Other	33	ExactMatch	553	437	435	468	457	451	608	725	1144	662	806	1014	5657.35	6568.17	6007.37	5824.45	2780.6	2778.62	2458.41	3693.27	5130.8	4142.45	5262.26	5013.82	-2.05391	8.7218e-05	0.00124332	1.6691	0.00177493	0.0983473	-1.23055	0.0127558	0.0436369
AS-tDR-001359	-	-	pre-chr2.trna7568-LysCTT	41	74	ACACATACTATAAACACCTAGGAAGAGCCAGACCTACAGAGCCCGGCTAGCTCAGTCGGTAGAGCATGAGACTCTTAATCTCAGGGTCGTGGGTTCGAGCCCCACGTTGGGCGCTTCCCTTTTACTATTTTTTTTTTTTTTTTAAAAACCCTA	153	....................(((((.(((.(((((.....((((((((.....))))))....))..((((.......)))).)))))(((((.......)))))....))).)))))...................................	GCCCGGCTAGCTCAGTCGGTAGAGCATGAGACTC	Other	34	ExactMatch	89	55	70	53	81	91	149	189	156	85	86	82	910.495	826.657	966.704	659.606	492.842	560.652	602.473	962.797	699.655	531.885	561.482	405.457	-1.28394	0.185883	0.23934	-1.19082	0.41951	0.679728	-1.52894	0.0178821	0.0516162
AS-tDR-013630	-	-	pre-chr2.trna7568-LysCTT	41	75	ACACATACTATAAACACCTAGGAAGAGCCAGACCTACAGAGCCCGGCTAGCTCAGTCGGTAGAGCATGAGACTCTTAATCTCAGGGTCGTGGGTTCGAGCCCCACGTTGGGCGCTTCCCTTTTACTATTTTTTTTTTTTTTTTAAAAACCCTA	153	....................(((((.(((.(((((.....((((((((.....))))))....))..((((.......)))).)))))(((((.......)))))....))).)))))...................................	GCCCGGCTAGCTCAGTCGGTAGAGCATGAGACTCA	Other	35	35T>A	60	81	77	105	70	157	402	332	117	64	52	55	613.817	1217.44	1063.37	1306.77	425.913	967.279	1625.46	1691.26	524.741	400.478	339.501	271.953	1.12092	0.718516	0.738923	-3.05965	0.0401003	0.245845	-2.72959	0.00645965	0.0275005
AS-tDR-001360	-	-	pre-chr2.trna7568-LysCTT	41	75	ACACATACTATAAACACCTAGGAAGAGCCAGACCTACAGAGCCCGGCTAGCTCAGTCGGTAGAGCATGAGACTCTTAATCTCAGGGTCGTGGGTTCGAGCCCCACGTTGGGCGCTTCCCTTTTACTATTTTTTTTTTTTTTTTAAAAACCCTA	153	....................(((((.(((.(((((.....((((((((.....))))))....))..((((.......)))).)))))(((((.......)))))....))).)))))...................................	GCCCGGCTAGCTCAGTCGGTAGAGCATGAGACTCT	Other	35	ExactMatch	344	411	357	570	449	889	1985	1755	541	347	327	340	3519.22	6177.39	4930.19	7093.88	2731.92	5477.14	8026.23	8940.26	2426.37	2171.34	2134.94	1681.16	1.15903	0.607992	0.638183	-2.99122	0.0244744	0.245845	-2.5808	0.00566398	0.0262757
AS-tDR-000886	-	-	pre-chr2.trna7568-LysCTT	41	76	ACACATACTATAAACACCTAGGAAGAGCCAGACCTACAGAGCCCGGCTAGCTCAGTCGGTAGAGCATGAGACTCTTAATCTCAGGGTCGTGGGTTCGAGCCCCACGTTGGGCGCTTCCCTTTTACTATTTTTTTTTTTTTTTTAAAAACCCTA	153	....................(((((.(((.(((((.....((((((((.....))))))....))..((((.......)))).)))))(((((.......)))))....))).)))))...................................	GCCCGGCTAGCTCAGTCGGTAGAGCATGAGACTCTT	Other	36	ExactMatch	115	153	118	226	167	384	870	837	249	137	109	98	1176.48	2299.61	1629.59	2812.66	1016.11	2365.83	3517.8	4263.82	1116.76	857.273	711.646	484.57	1.40963	0.347097	0.381028	-3.51817	0.0323639	0.245845	-2.49582	0.0214772	0.0556641
AS-tDR-011146	-	-	pre-chr2.trna7568-LysCTT	41	91	ACACATACTATAAACACCTAGGAAGAGCCAGACCTACAGAGCCCGGCTAGCTCAGTCGGTAGAGCATGAGACTCTTAATCTCAGGGTCGTGGGTTCGAGCCCCACGTTGGGCGCTTCCCTTTTACTATTTTTTTTTTTTTTTTAAAAACCCTA	153	....................(((((.(((.(((((.....((((((((.....))))))....))..((((.......)))).)))))(((((.......)))))....))).)))))...................................	GCCCGGCTAGCTCAGTCGGTAGAGCATGAGACTCTTAATCTCAGGGTCGTG	Other	51	ExactMatch	226	188	255	328	318	194	372	336	102	157	237	127	2312.04	2825.67	3521.56	4082.09	1934.86	1195.24	1504.16	1711.64	457.467	982.423	1547.34	627.964	-2.00718	0.00879673	0.0198741	-1.75451	0.0552359	0.290644	-3.5216	0.0024676	0.0179404
AS-tDR-013631	-	-	pre-chr2.trna7568-LysCTT	42	75	ACACATACTATAAACACCTAGGAAGAGCCAGACCTACAGAGCCCGGCTAGCTCAGTCGGTAGAGCATGAGACTCTTAATCTCAGGGTCGTGGGTTCGAGCCCCACGTTGGGCGCTTCCCTTTTACTATTTTTTTTTTTTTTTTAAAAACCCTA	153	....................(((((.(((.(((((.....((((((((.....))))))....))..((((.......)))).)))))(((((.......)))))....))).)))))...................................	CCCGGCTAGCTCAGTCGGTAGAGCATGAGACTCT	Other	34	ExactMatch	54	56	30	90	0	80	409	69	71	38	0	26	552.435	841.688	414.302	1120.09	0	492.881	1653.77	351.497	318.433	237.784	0	128.559	-1.172	0.792554	0.810506	-3.63274	0.26054	0.570536	-4.25757	0.017029	0.0515523
AS-tDR-003992	-	-	pre-chr2.trna7568-LysCTT	43	75	ACACATACTATAAACACCTAGGAAGAGCCAGACCTACAGAGCCCGGCTAGCTCAGTCGGTAGAGCATGAGACTCTTAATCTCAGGGTCGTGGGTTCGAGCCCCACGTTGGGCGCTTCCCTTTTACTATTTTTTTTTTTTTTTTAAAAACCCTA	153	....................(((((.(((.(((((.....((((((((.....))))))....))..((((.......)))).)))))(((((.......)))))....))).)))))...................................	CCGGCTAGCTCAGTCGGTAGAGCATGAGACTCT	Other	33	ExactMatch	174	240	143	303	76	217	1497	210	231	110	102	109	1780.07	3607.23	1974.84	3770.95	462.419	1336.94	6053.03	1069.77	1036.03	688.322	665.944	538.961	-1.24769	0.704727	0.728843	-3.04309	0.290134	0.596906	-3.79684	0.00871128	0.0330812
AS-tDR-010789	-	-	pre-chr2.trna7568-LysCTT	53	68	ACACATACTATAAACACCTAGGAAGAGCCAGACCTACAGAGCCCGGCTAGCTCAGTCGGTAGAGCATGAGACTCTTAATCTCAGGGTCGTGGGTTCGAGCCCCACGTTGGGCGCTTCCCTTTTACTATTTTTTTTTTTTTTTTAAAAACCCTA	153	....................(((((.(((.(((((.....((((((((.....))))))....))..((((.......)))).)))))(((((.......)))))....))).)))))...................................	CAGTCGGTAGAGCATT	Other	16	16G>T	121	89	110	57	34	76	115	34	114	128	100	66	1237.86	1337.68	1519.11	709.388	206.872	468.237	464.996	173.202	511.286	800.956	652.886	326.343	-3.6499	0.003861	0.0128244	1.74255	0.107069	0.392337	-2.09458	0.0205442	0.0544028
AS-tDR-003930	-	-	pre-chr2.trna7568-LysCTT	54	72	ACACATACTATAAACACCTAGGAAGAGCCAGACCTACAGAGCCCGGCTAGCTCAGTCGGTAGAGCATGAGACTCTTAATCTCAGGGTCGTGGGTTCGAGCCCCACGTTGGGCGCTTCCCTTTTACTATTTTTTTTTTTTTTTTAAAAACCCTA	153	....................(((((.(((.(((((.....((((((((.....))))))....))..((((.......)))).)))))(((((.......)))))....))).)))))...................................	AGTCGGTAGAGCATGAGAC	Other	19	ExactMatch	89	86	83	63	37	94	114	94	172	106	184	143	910.495	1292.59	1146.23	784.06	225.125	579.135	460.952	478.852	771.415	663.292	1201.31	707.077	-2.36684	0.00473886	0.0130917	1.91474	0.0327932	0.245845	-1.23611	0.285778	0.354148
AS-tDR-004117	-	-	pre-chr2.trna7568-LysCTT	56	71	ACACATACTATAAACACCTAGGAAGAGCCAGACCTACAGAGCCCGGCTAGCTCAGTCGGTAGAGCATGAGACTCTTAATCTCAGGGTCGTGGGTTCGAGCCCCACGTTGGGCGCTTCCCTTTTACTATTTTTTTTTTTTTTTTAAAAACCCTA	153	....................(((((.(((.(((((.....((((((((.....))))))....))..((((.......)))).)))))(((((.......)))))....))).)))))...................................	TCGGTAGAGCATGAGA	Other	16	ExactMatch	111	99	80	62	45	77	127	31	141	139	143	121	1135.56	1487.98	1104.8	771.615	273.801	474.398	513.517	157.919	632.381	869.788	933.628	598.296	-3.16371	0.00384386	0.0128244	2.13404	0.0145568	0.245845	-1.4825	0.0729155	0.122825
AS-tDR-004118	-	-	pre-chr2.trna7568-LysCTT	56	72	ACACATACTATAAACACCTAGGAAGAGCCAGACCTACAGAGCCCGGCTAGCTCAGTCGGTAGAGCATGAGACTCTTAATCTCAGGGTCGTGGGTTCGAGCCCCACGTTGGGCGCTTCCCTTTTACTATTTTTTTTTTTTTTTTAAAAACCCTA	153	....................(((((.(((.(((((.....((((((((.....))))))....))..((((.......)))).)))))(((((.......)))))....))).)))))...................................	TCGGTAGAGCATGAGAC	Other	17	ExactMatch	72	59	65	54	42	54	74	0	138	113	117	131	736.58	886.778	897.654	672.051	255.548	332.695	299.215	0	618.926	707.094	763.877	647.742	-3.58634	0.000861108	0.00530147	3.07546	0.00134716	0.0983473	-1.16611	0.127928	0.191186
AS-tDR-007534	-	-	pre-chr7.trna2975-LysCTT	41	73	AGATCTACATTGGATTTTATTTTTTGAGAAAATAAACAGCGCCCGGCTAGCTCAGTCGGTAGAGCATGAGACTCTTAATCTCAGGGTCGTGGGTTCGAGCCCCACGTTGGGCGCAAGCAAATGTTTTGGGCTGGAGAGACGGCTCAGTGGTTA	153	.((((.(((((....(((((((((...)))))))))..(((((((((..((((........))))....((((((.......))))))..((((....))))...))))))))).....))))).((((((((......)))))))).)))).	GCCCGGCTAGCTCAGTCGGTAGAGCATGAGACA	Other	33	33T>A	99	61	59	79	70	71	106	112	195	114	123	124	1012.8	916.838	814.793	983.186	425.913	437.432	428.605	570.547	874.569	713.352	803.05	613.13	-1.99926	0.000165713	0.00200004	1.61163	0.00515907	0.131019	-1.24052	0.0449082	0.0873126
AS-tDR-001358	-	-	pre-chr7.trna2975-LysCTT	41	73	AGATCTACATTGGATTTTATTTTTTGAGAAAATAAACAGCGCCCGGCTAGCTCAGTCGGTAGAGCATGAGACTCTTAATCTCAGGGTCGTGGGTTCGAGCCCCACGTTGGGCGCAAGCAAATGTTTTGGGCTGGAGAGACGGCTCAGTGGTTA	153	.((((.(((((....(((((((((...)))))))))..(((((((((..((((........))))....((((((.......))))))..((((....))))...))))))))).....))))).((((((((......)))))))).)))).	GCCCGGCTAGCTCAGTCGGTAGAGCATGAGACT	Other	33	ExactMatch	553	437	435	468	457	451	608	725	1144	662	806	1014	5657.35	6568.17	6007.37	5824.45	2780.6	2778.62	2458.41	3693.27	5130.8	4142.45	5262.26	5013.82	-2.05391	8.7218e-05	0.00124332	1.6691	0.00177493	0.0983473	-1.23055	0.0127558	0.0436369
AS-tDR-001359	-	-	pre-chr7.trna2975-LysCTT	41	74	AGATCTACATTGGATTTTATTTTTTGAGAAAATAAACAGCGCCCGGCTAGCTCAGTCGGTAGAGCATGAGACTCTTAATCTCAGGGTCGTGGGTTCGAGCCCCACGTTGGGCGCAAGCAAATGTTTTGGGCTGGAGAGACGGCTCAGTGGTTA	153	.((((.(((((....(((((((((...)))))))))..(((((((((..((((........))))....((((((.......))))))..((((....))))...))))))))).....))))).((((((((......)))))))).)))).	GCCCGGCTAGCTCAGTCGGTAGAGCATGAGACTC	Other	34	ExactMatch	89	55	70	53	81	91	149	189	156	85	86	82	910.495	826.657	966.704	659.606	492.842	560.652	602.473	962.797	699.655	531.885	561.482	405.457	-1.28394	0.185883	0.23934	-1.19082	0.41951	0.679728	-1.52894	0.0178821	0.0516162
AS-tDR-013630	-	-	pre-chr7.trna2975-LysCTT	41	75	AGATCTACATTGGATTTTATTTTTTGAGAAAATAAACAGCGCCCGGCTAGCTCAGTCGGTAGAGCATGAGACTCTTAATCTCAGGGTCGTGGGTTCGAGCCCCACGTTGGGCGCAAGCAAATGTTTTGGGCTGGAGAGACGGCTCAGTGGTTA	153	.((((.(((((....(((((((((...)))))))))..(((((((((..((((........))))....((((((.......))))))..((((....))))...))))))))).....))))).((((((((......)))))))).)))).	GCCCGGCTAGCTCAGTCGGTAGAGCATGAGACTCA	Other	35	35T>A	60	81	77	105	70	157	402	332	117	64	52	55	613.817	1217.44	1063.37	1306.77	425.913	967.279	1625.46	1691.26	524.741	400.478	339.501	271.953	1.12092	0.718516	0.738923	-3.05965	0.0401003	0.245845	-2.72959	0.00645965	0.0275005
AS-tDR-001360	-	-	pre-chr7.trna2975-LysCTT	41	75	AGATCTACATTGGATTTTATTTTTTGAGAAAATAAACAGCGCCCGGCTAGCTCAGTCGGTAGAGCATGAGACTCTTAATCTCAGGGTCGTGGGTTCGAGCCCCACGTTGGGCGCAAGCAAATGTTTTGGGCTGGAGAGACGGCTCAGTGGTTA	153	.((((.(((((....(((((((((...)))))))))..(((((((((..((((........))))....((((((.......))))))..((((....))))...))))))))).....))))).((((((((......)))))))).)))).	GCCCGGCTAGCTCAGTCGGTAGAGCATGAGACTCT	Other	35	ExactMatch	344	411	357	570	449	889	1985	1755	541	347	327	340	3519.22	6177.39	4930.19	7093.88	2731.92	5477.14	8026.23	8940.26	2426.37	2171.34	2134.94	1681.16	1.15903	0.607992	0.638183	-2.99122	0.0244744	0.245845	-2.5808	0.00566398	0.0262757
AS-tDR-000886	-	-	pre-chr7.trna2975-LysCTT	41	76	AGATCTACATTGGATTTTATTTTTTGAGAAAATAAACAGCGCCCGGCTAGCTCAGTCGGTAGAGCATGAGACTCTTAATCTCAGGGTCGTGGGTTCGAGCCCCACGTTGGGCGCAAGCAAATGTTTTGGGCTGGAGAGACGGCTCAGTGGTTA	153	.((((.(((((....(((((((((...)))))))))..(((((((((..((((........))))....((((((.......))))))..((((....))))...))))))))).....))))).((((((((......)))))))).)))).	GCCCGGCTAGCTCAGTCGGTAGAGCATGAGACTCTT	Other	36	ExactMatch	115	153	118	226	167	384	870	837	249	137	109	98	1176.48	2299.61	1629.59	2812.66	1016.11	2365.83	3517.8	4263.82	1116.76	857.273	711.646	484.57	1.40963	0.347097	0.381028	-3.51817	0.0323639	0.245845	-2.49582	0.0214772	0.0556641
AS-tDR-011146	-	-	pre-chr7.trna2975-LysCTT	41	91	AGATCTACATTGGATTTTATTTTTTGAGAAAATAAACAGCGCCCGGCTAGCTCAGTCGGTAGAGCATGAGACTCTTAATCTCAGGGTCGTGGGTTCGAGCCCCACGTTGGGCGCAAGCAAATGTTTTGGGCTGGAGAGACGGCTCAGTGGTTA	153	.((((.(((((....(((((((((...)))))))))..(((((((((..((((........))))....((((((.......))))))..((((....))))...))))))))).....))))).((((((((......)))))))).)))).	GCCCGGCTAGCTCAGTCGGTAGAGCATGAGACTCTTAATCTCAGGGTCGTG	Other	51	ExactMatch	226	188	255	328	318	194	372	336	102	157	237	127	2312.04	2825.67	3521.56	4082.09	1934.86	1195.24	1504.16	1711.64	457.467	982.423	1547.34	627.964	-2.00718	0.00879673	0.0198741	-1.75451	0.0552359	0.290644	-3.5216	0.0024676	0.0179404
AS-tDR-013631	-	-	pre-chr7.trna2975-LysCTT	42	75	AGATCTACATTGGATTTTATTTTTTGAGAAAATAAACAGCGCCCGGCTAGCTCAGTCGGTAGAGCATGAGACTCTTAATCTCAGGGTCGTGGGTTCGAGCCCCACGTTGGGCGCAAGCAAATGTTTTGGGCTGGAGAGACGGCTCAGTGGTTA	153	.((((.(((((....(((((((((...)))))))))..(((((((((..((((........))))....((((((.......))))))..((((....))))...))))))))).....))))).((((((((......)))))))).)))).	CCCGGCTAGCTCAGTCGGTAGAGCATGAGACTCT	Other	34	ExactMatch	54	56	30	90	0	80	409	69	71	38	0	26	552.435	841.688	414.302	1120.09	0	492.881	1653.77	351.497	318.433	237.784	0	128.559	-1.172	0.792554	0.810506	-3.63274	0.26054	0.570536	-4.25757	0.017029	0.0515523
AS-tDR-003992	-	-	pre-chr7.trna2975-LysCTT	43	75	AGATCTACATTGGATTTTATTTTTTGAGAAAATAAACAGCGCCCGGCTAGCTCAGTCGGTAGAGCATGAGACTCTTAATCTCAGGGTCGTGGGTTCGAGCCCCACGTTGGGCGCAAGCAAATGTTTTGGGCTGGAGAGACGGCTCAGTGGTTA	153	.((((.(((((....(((((((((...)))))))))..(((((((((..((((........))))....((((((.......))))))..((((....))))...))))))))).....))))).((((((((......)))))))).)))).	CCGGCTAGCTCAGTCGGTAGAGCATGAGACTCT	Other	33	ExactMatch	174	240	143	303	76	217	1497	210	231	110	102	109	1780.07	3607.23	1974.84	3770.95	462.419	1336.94	6053.03	1069.77	1036.03	688.322	665.944	538.961	-1.24769	0.704727	0.728843	-3.04309	0.290134	0.596906	-3.79684	0.00871128	0.0330812
AS-tDR-010789	-	-	pre-chr7.trna2975-LysCTT	53	68	AGATCTACATTGGATTTTATTTTTTGAGAAAATAAACAGCGCCCGGCTAGCTCAGTCGGTAGAGCATGAGACTCTTAATCTCAGGGTCGTGGGTTCGAGCCCCACGTTGGGCGCAAGCAAATGTTTTGGGCTGGAGAGACGGCTCAGTGGTTA	153	.((((.(((((....(((((((((...)))))))))..(((((((((..((((........))))....((((((.......))))))..((((....))))...))))))))).....))))).((((((((......)))))))).)))).	CAGTCGGTAGAGCATT	Other	16	16G>T	121	89	110	57	34	76	115	34	114	128	100	66	1237.86	1337.68	1519.11	709.388	206.872	468.237	464.996	173.202	511.286	800.956	652.886	326.343	-3.6499	0.003861	0.0128244	1.74255	0.107069	0.392337	-2.09458	0.0205442	0.0544028
AS-tDR-003930	-	-	pre-chr7.trna2975-LysCTT	54	72	AGATCTACATTGGATTTTATTTTTTGAGAAAATAAACAGCGCCCGGCTAGCTCAGTCGGTAGAGCATGAGACTCTTAATCTCAGGGTCGTGGGTTCGAGCCCCACGTTGGGCGCAAGCAAATGTTTTGGGCTGGAGAGACGGCTCAGTGGTTA	153	.((((.(((((....(((((((((...)))))))))..(((((((((..((((........))))....((((((.......))))))..((((....))))...))))))))).....))))).((((((((......)))))))).)))).	AGTCGGTAGAGCATGAGAC	Other	19	ExactMatch	89	86	83	63	37	94	114	94	172	106	184	143	910.495	1292.59	1146.23	784.06	225.125	579.135	460.952	478.852	771.415	663.292	1201.31	707.077	-2.36684	0.00473886	0.0130917	1.91474	0.0327932	0.245845	-1.23611	0.285778	0.354148
AS-tDR-004117	-	-	pre-chr7.trna2975-LysCTT	56	71	AGATCTACATTGGATTTTATTTTTTGAGAAAATAAACAGCGCCCGGCTAGCTCAGTCGGTAGAGCATGAGACTCTTAATCTCAGGGTCGTGGGTTCGAGCCCCACGTTGGGCGCAAGCAAATGTTTTGGGCTGGAGAGACGGCTCAGTGGTTA	153	.((((.(((((....(((((((((...)))))))))..(((((((((..((((........))))....((((((.......))))))..((((....))))...))))))))).....))))).((((((((......)))))))).)))).	TCGGTAGAGCATGAGA	Other	16	ExactMatch	111	99	80	62	45	77	127	31	141	139	143	121	1135.56	1487.98	1104.8	771.615	273.801	474.398	513.517	157.919	632.381	869.788	933.628	598.296	-3.16371	0.00384386	0.0128244	2.13404	0.0145568	0.245845	-1.4825	0.0729155	0.122825
AS-tDR-004118	-	-	pre-chr7.trna2975-LysCTT	56	72	AGATCTACATTGGATTTTATTTTTTGAGAAAATAAACAGCGCCCGGCTAGCTCAGTCGGTAGAGCATGAGACTCTTAATCTCAGGGTCGTGGGTTCGAGCCCCACGTTGGGCGCAAGCAAATGTTTTGGGCTGGAGAGACGGCTCAGTGGTTA	153	.((((.(((((....(((((((((...)))))))))..(((((((((..((((........))))....((((((.......))))))..((((....))))...))))))))).....))))).((((((((......)))))))).)))).	TCGGTAGAGCATGAGAC	Other	17	ExactMatch	72	59	65	54	42	54	74	0	138	113	117	131	736.58	886.778	897.654	672.051	255.548	332.695	299.215	0	618.926	707.094	763.877	647.742	-3.58634	0.000861108	0.00530147	3.07546	0.00134716	0.0983473	-1.16611	0.127928	0.191186
AS-tDR-007910	-	-	chr10.trna1308-ValCAC	1	23	GTTTCCGTAGTGTAGTGGTTATCACGTTCGCCTCACACGCGAAAGGTCCCCGGTTCGAAACCGGGCGGAAACACCA	76	)))))))..)))..........(((.))))).......(((((.....))))).......((((((((((((.	GTTTCCGTAGTGTAGTGGTTATA	tRF-5	23	23C>A	350	128	171	150	93	128	161	135	142	151	159	174	3580.6	1923.86	2361.52	1866.81	565.855	788.61	650.994	687.712	636.866	944.878	1038.09	860.36	-3.61	0.00461169	0.0130917	1.2918	0.0899023	0.351095	-2.79456	0.00857553	0.0330812
AS-tDR-000052	-	-	chr10.trna1308-ValCAC	1	23	GTTTCCGTAGTGTAGTGGTTATCACGTTCGCCTCACACGCGAAAGGTCCCCGGTTCGAAACCGGGCGGAAACACCA	76	)))))))..)))..........(((.))))).......(((((.....))))).......((((((((((((.	GTTTCCGTAGTGTAGTGGTTATC	tRF-5	23	ExactMatch	1719	577	783	672	543	569	733	591	700	802	728	973	17585.9	8672.39	10813.3	8363.31	3303.86	3505.62	2963.84	3010.65	3139.48	5018.49	4753.01	4811.09	-3.55325	0.00899961	0.0198741	1.38615	0.0342665	0.245845	-2.56339	0.0194579	0.0530631
AS-tDR-007919	-	-	chr10.trna1308-ValCAC	1	23	GTTTCCGTAGTGTAGTGGTTATCACGTTCGCCTCACACGCGAAAGGTCCCCGGTTCGAAACCGGGCGGAAACACCA	76	)))))))..)))..........(((.))))).......(((((.....))))).......((((((((((((.	GTTTCCGTAGTGTAGTGGTTATT	tRF-5	23	23C>T	1183	397	592	483	416	406	526	489	516	535	518	564	12102.4	5966.96	8175.55	6011.13	2531.14	2501.37	2126.85	2491.05	2314.24	3347.75	3381.95	2788.75	-3.34149	0.00787369	0.0186865	1.22604	0.091206	0.351095	-2.72543	0.0130088	0.0436453
AS-tDR-001449	-	-	chr10.trna1308-ValCAC	1	32	GTTTCCGTAGTGTAGTGGTTATCACGTTCGCCTCACACGCGAAAGGTCCCCGGTTCGAAACCGGGCGGAAACACCA	76	)))))))..)))..........(((.))))).......(((((.....))))).......((((((((((((.	GTTTCCGTAGTGTAGTGGTTATCACGTTCGCC	tiRNA-5	32	ExactMatch	233	142	154	151	331	348	431	357	414	295	298	407	2383.66	2134.28	2126.75	1879.25	2013.96	2144.03	1742.72	1818.62	1856.78	1845.95	1945.6	2012.45	-1.10418	0.194408	0.247718	-1.00764	0.887925	1	-1.11261	0.0980373	0.154936
AS-tDR-007276	-	-	chr10.trna1308-ValCAC	1	32	GTTTCCGTAGTGTAGTGGTTATCACGTTCGCCTCACACGCGAAAGGTCCCCGGTTCGAAACCGGGCGGAAACACCA	76	)))))))..)))..........(((.))))).......(((((.....))))).......((((((((((((.	GTTTCCGTAGTGTAGTGGTTATCACGTTCGCT	tiRNA-5	32	32C>T	260	179	184	206	408	402	510	415	567	338	343	485	2659.87	2690.39	2541.05	2563.75	2482.46	2476.73	2062.16	2114.08	2542.98	2115.02	2239.4	2398.13	-1.14439	0.0324862	0.0528009	1.01752	0.794364	1	-1.12469	0.0274018	0.0649438
AS-tDR-005435	-	-	chr10.trna1308-ValCAC	2	23	GTTTCCGTAGTGTAGTGGTTATCACGTTCGCCTCACACGCGAAAGGTCCCCGGTTCGAAACCGGGCGGAAACACCA	76	)))))))..)))..........(((.))))).......(((((.....))))).......((((((((((((.	TTTCCGTAGTGTAGTGGTTATC	tRF-5	22	ExactMatch	352	280	275	317	202	228	300	224	276	363	414	469	3601.06	4208.44	3797.77	3945.19	1229.06	1404.71	1213.03	1141.09	1237.85	2271.46	2702.95	2319.02	-3.11634	1.41141e-06	0.000125891	1.70983	0.03195	0.245845	-1.82261	0.00204843	0.015804
AS-tDR-010786	-	-	chr10.trna1308-ValCAC	2	23	GTTTCCGTAGTGTAGTGGTTATCACGTTCGCCTCACACGCGAAAGGTCCCCGGTTCGAAACCGGGCGGAAACACCA	76	)))))))..)))..........(((.))))).......(((((.....))))).......((((((((((((.	TTTCCGTAGTGTAGTGGTTATT	tRF-5	22	22C>T	245	169	181	210	204	171	206	182	209	260	257	274	2506.42	2540.09	2499.62	2613.53	1241.23	1053.53	832.949	927.138	937.358	1626.94	1677.92	1354.82	-2.50407	3.07076e-06	0.000172766	1.37996	0.0902417	0.351095	-1.8146	0.000558268	0.00544423
AS-tDR-007910	-	-	chr13.trna2253-ValCAC	1	23	GTTTCCGTAGTGTAGTGGTTATCACGTTCGCCTCACACGCGAAAGGTCCCCGGTTCGAAACCGGGCGGAAACACCA	76	)))))))..)))..........(((.))))).......(((((.....))))).......((((((((((((.	GTTTCCGTAGTGTAGTGGTTATA	tRF-5	23	23C>A	350	128	171	150	93	128	161	135	142	151	159	174	3580.6	1923.86	2361.52	1866.81	565.855	788.61	650.994	687.712	636.866	944.878	1038.09	860.36	-3.61	0.00461169	0.0130917	1.2918	0.0899023	0.351095	-2.79456	0.00857553	0.0330812
AS-tDR-000052	-	-	chr13.trna2253-ValCAC	1	23	GTTTCCGTAGTGTAGTGGTTATCACGTTCGCCTCACACGCGAAAGGTCCCCGGTTCGAAACCGGGCGGAAACACCA	76	)))))))..)))..........(((.))))).......(((((.....))))).......((((((((((((.	GTTTCCGTAGTGTAGTGGTTATC	tRF-5	23	ExactMatch	1719	577	783	672	543	569	733	591	700	802	728	973	17585.9	8672.39	10813.3	8363.31	3303.86	3505.62	2963.84	3010.65	3139.48	5018.49	4753.01	4811.09	-3.55325	0.00899961	0.0198741	1.38615	0.0342665	0.245845	-2.56339	0.0194579	0.0530631
AS-tDR-007919	-	-	chr13.trna2253-ValCAC	1	23	GTTTCCGTAGTGTAGTGGTTATCACGTTCGCCTCACACGCGAAAGGTCCCCGGTTCGAAACCGGGCGGAAACACCA	76	)))))))..)))..........(((.))))).......(((((.....))))).......((((((((((((.	GTTTCCGTAGTGTAGTGGTTATT	tRF-5	23	23C>T	1183	397	592	483	416	406	526	489	516	535	518	564	12102.4	5966.96	8175.55	6011.13	2531.14	2501.37	2126.85	2491.05	2314.24	3347.75	3381.95	2788.75	-3.34149	0.00787369	0.0186865	1.22604	0.091206	0.351095	-2.72543	0.0130088	0.0436453
AS-tDR-001449	-	-	chr13.trna2253-ValCAC	1	32	GTTTCCGTAGTGTAGTGGTTATCACGTTCGCCTCACACGCGAAAGGTCCCCGGTTCGAAACCGGGCGGAAACACCA	76	)))))))..)))..........(((.))))).......(((((.....))))).......((((((((((((.	GTTTCCGTAGTGTAGTGGTTATCACGTTCGCC	tiRNA-5	32	ExactMatch	233	142	154	151	331	348	431	357	414	295	298	407	2383.66	2134.28	2126.75	1879.25	2013.96	2144.03	1742.72	1818.62	1856.78	1845.95	1945.6	2012.45	-1.10418	0.194408	0.247718	-1.00764	0.887925	1	-1.11261	0.0980373	0.154936
AS-tDR-007276	-	-	chr13.trna2253-ValCAC	1	32	GTTTCCGTAGTGTAGTGGTTATCACGTTCGCCTCACACGCGAAAGGTCCCCGGTTCGAAACCGGGCGGAAACACCA	76	)))))))..)))..........(((.))))).......(((((.....))))).......((((((((((((.	GTTTCCGTAGTGTAGTGGTTATCACGTTCGCT	tiRNA-5	32	32C>T	260	179	184	206	408	402	510	415	567	338	343	485	2659.87	2690.39	2541.05	2563.75	2482.46	2476.73	2062.16	2114.08	2542.98	2115.02	2239.4	2398.13	-1.14439	0.0324862	0.0528009	1.01752	0.794364	1	-1.12469	0.0274018	0.0649438
AS-tDR-005435	-	-	chr13.trna2253-ValCAC	2	23	GTTTCCGTAGTGTAGTGGTTATCACGTTCGCCTCACACGCGAAAGGTCCCCGGTTCGAAACCGGGCGGAAACACCA	76	)))))))..)))..........(((.))))).......(((((.....))))).......((((((((((((.	TTTCCGTAGTGTAGTGGTTATC	tRF-5	22	ExactMatch	352	280	275	317	202	228	300	224	276	363	414	469	3601.06	4208.44	3797.77	3945.19	1229.06	1404.71	1213.03	1141.09	1237.85	2271.46	2702.95	2319.02	-3.11634	1.41141e-06	0.000125891	1.70983	0.03195	0.245845	-1.82261	0.00204843	0.015804
AS-tDR-010786	-	-	chr13.trna2253-ValCAC	2	23	GTTTCCGTAGTGTAGTGGTTATCACGTTCGCCTCACACGCGAAAGGTCCCCGGTTCGAAACCGGGCGGAAACACCA	76	)))))))..)))..........(((.))))).......(((((.....))))).......((((((((((((.	TTTCCGTAGTGTAGTGGTTATT	tRF-5	22	22C>T	245	169	181	210	204	171	206	182	209	260	257	274	2506.42	2540.09	2499.62	2613.53	1241.23	1053.53	832.949	927.138	937.358	1626.94	1677.92	1354.82	-2.50407	3.07076e-06	0.000172766	1.37996	0.0902417	0.351095	-1.8146	0.000558268	0.00544423
AS-tDR-007910	-	-	chr2.trna4363-ValCAC	1	23	GTTTCCGTAGTGTAGTGGTTATCACGTTCGCCTCACACGCGAAAGGTCCCCGGTTCGAAACCGGGCGGAAACACCA	76	)))))))..)))..........(((.))))).......(((((.....))))).......((((((((((((.	GTTTCCGTAGTGTAGTGGTTATA	tRF-5	23	23C>A	350	128	171	150	93	128	161	135	142	151	159	174	3580.6	1923.86	2361.52	1866.81	565.855	788.61	650.994	687.712	636.866	944.878	1038.09	860.36	-3.61	0.00461169	0.0130917	1.2918	0.0899023	0.351095	-2.79456	0.00857553	0.0330812
AS-tDR-000052	-	-	chr2.trna4363-ValCAC	1	23	GTTTCCGTAGTGTAGTGGTTATCACGTTCGCCTCACACGCGAAAGGTCCCCGGTTCGAAACCGGGCGGAAACACCA	76	)))))))..)))..........(((.))))).......(((((.....))))).......((((((((((((.	GTTTCCGTAGTGTAGTGGTTATC	tRF-5	23	ExactMatch	1719	577	783	672	543	569	733	591	700	802	728	973	17585.9	8672.39	10813.3	8363.31	3303.86	3505.62	2963.84	3010.65	3139.48	5018.49	4753.01	4811.09	-3.55325	0.00899961	0.0198741	1.38615	0.0342665	0.245845	-2.56339	0.0194579	0.0530631
AS-tDR-007919	-	-	chr2.trna4363-ValCAC	1	23	GTTTCCGTAGTGTAGTGGTTATCACGTTCGCCTCACACGCGAAAGGTCCCCGGTTCGAAACCGGGCGGAAACACCA	76	)))))))..)))..........(((.))))).......(((((.....))))).......((((((((((((.	GTTTCCGTAGTGTAGTGGTTATT	tRF-5	23	23C>T	1183	397	592	483	416	406	526	489	516	535	518	564	12102.4	5966.96	8175.55	6011.13	2531.14	2501.37	2126.85	2491.05	2314.24	3347.75	3381.95	2788.75	-3.34149	0.00787369	0.0186865	1.22604	0.091206	0.351095	-2.72543	0.0130088	0.0436453
AS-tDR-001449	-	-	chr2.trna4363-ValCAC	1	32	GTTTCCGTAGTGTAGTGGTTATCACGTTCGCCTCACACGCGAAAGGTCCCCGGTTCGAAACCGGGCGGAAACACCA	76	)))))))..)))..........(((.))))).......(((((.....))))).......((((((((((((.	GTTTCCGTAGTGTAGTGGTTATCACGTTCGCC	tiRNA-5	32	ExactMatch	233	142	154	151	331	348	431	357	414	295	298	407	2383.66	2134.28	2126.75	1879.25	2013.96	2144.03	1742.72	1818.62	1856.78	1845.95	1945.6	2012.45	-1.10418	0.194408	0.247718	-1.00764	0.887925	1	-1.11261	0.0980373	0.154936
AS-tDR-007276	-	-	chr2.trna4363-ValCAC	1	32	GTTTCCGTAGTGTAGTGGTTATCACGTTCGCCTCACACGCGAAAGGTCCCCGGTTCGAAACCGGGCGGAAACACCA	76	)))))))..)))..........(((.))))).......(((((.....))))).......((((((((((((.	GTTTCCGTAGTGTAGTGGTTATCACGTTCGCT	tiRNA-5	32	32C>T	260	179	184	206	408	402	510	415	567	338	343	485	2659.87	2690.39	2541.05	2563.75	2482.46	2476.73	2062.16	2114.08	2542.98	2115.02	2239.4	2398.13	-1.14439	0.0324862	0.0528009	1.01752	0.794364	1	-1.12469	0.0274018	0.0649438
AS-tDR-005435	-	-	chr2.trna4363-ValCAC	2	23	GTTTCCGTAGTGTAGTGGTTATCACGTTCGCCTCACACGCGAAAGGTCCCCGGTTCGAAACCGGGCGGAAACACCA	76	)))))))..)))..........(((.))))).......(((((.....))))).......((((((((((((.	TTTCCGTAGTGTAGTGGTTATC	tRF-5	22	ExactMatch	352	280	275	317	202	228	300	224	276	363	414	469	3601.06	4208.44	3797.77	3945.19	1229.06	1404.71	1213.03	1141.09	1237.85	2271.46	2702.95	2319.02	-3.11634	1.41141e-06	0.000125891	1.70983	0.03195	0.245845	-1.82261	0.00204843	0.015804
AS-tDR-010786	-	-	chr2.trna4363-ValCAC	2	23	GTTTCCGTAGTGTAGTGGTTATCACGTTCGCCTCACACGCGAAAGGTCCCCGGTTCGAAACCGGGCGGAAACACCA	76	)))))))..)))..........(((.))))).......(((((.....))))).......((((((((((((.	TTTCCGTAGTGTAGTGGTTATT	tRF-5	22	22C>T	245	169	181	210	204	171	206	182	209	260	257	274	2506.42	2540.09	2499.62	2613.53	1241.23	1053.53	832.949	927.138	937.358	1626.94	1677.92	1354.82	-2.50407	3.07076e-06	0.000172766	1.37996	0.0902417	0.351095	-1.8146	0.000558268	0.00544423
AS-tDR-007910	-	-	chr10.trna1309-ValAAC	1	23	GTTTCCGTAGTGTAGTGGTTATCACGTTCGCCTAACACGCGAAAGGTCCCCGGTTCGAAACCGGGCGGAAACACCA	76	)))))))..)))..........(((.))))).......(((((.....))))).......((((((((((((.	GTTTCCGTAGTGTAGTGGTTATA	tRF-5	23	23C>A	350	128	171	150	93	128	161	135	142	151	159	174	3580.6	1923.86	2361.52	1866.81	565.855	788.61	650.994	687.712	636.866	944.878	1038.09	860.36	-3.61	0.00461169	0.0130917	1.2918	0.0899023	0.351095	-2.79456	0.00857553	0.0330812
AS-tDR-000052	-	-	chr10.trna1309-ValAAC	1	23	GTTTCCGTAGTGTAGTGGTTATCACGTTCGCCTAACACGCGAAAGGTCCCCGGTTCGAAACCGGGCGGAAACACCA	76	)))))))..)))..........(((.))))).......(((((.....))))).......((((((((((((.	GTTTCCGTAGTGTAGTGGTTATC	tRF-5	23	ExactMatch	1719	577	783	672	543	569	733	591	700	802	728	973	17585.9	8672.39	10813.3	8363.31	3303.86	3505.62	2963.84	3010.65	3139.48	5018.49	4753.01	4811.09	-3.55325	0.00899961	0.0198741	1.38615	0.0342665	0.245845	-2.56339	0.0194579	0.0530631
AS-tDR-007919	-	-	chr10.trna1309-ValAAC	1	23	GTTTCCGTAGTGTAGTGGTTATCACGTTCGCCTAACACGCGAAAGGTCCCCGGTTCGAAACCGGGCGGAAACACCA	76	)))))))..)))..........(((.))))).......(((((.....))))).......((((((((((((.	GTTTCCGTAGTGTAGTGGTTATT	tRF-5	23	23C>T	1183	397	592	483	416	406	526	489	516	535	518	564	12102.4	5966.96	8175.55	6011.13	2531.14	2501.37	2126.85	2491.05	2314.24	3347.75	3381.95	2788.75	-3.34149	0.00787369	0.0186865	1.22604	0.091206	0.351095	-2.72543	0.0130088	0.0436453
AS-tDR-001449	-	-	chr10.trna1309-ValAAC	1	32	GTTTCCGTAGTGTAGTGGTTATCACGTTCGCCTAACACGCGAAAGGTCCCCGGTTCGAAACCGGGCGGAAACACCA	76	)))))))..)))..........(((.))))).......(((((.....))))).......((((((((((((.	GTTTCCGTAGTGTAGTGGTTATCACGTTCGCC	tiRNA-5	32	ExactMatch	233	142	154	151	331	348	431	357	414	295	298	407	2383.66	2134.28	2126.75	1879.25	2013.96	2144.03	1742.72	1818.62	1856.78	1845.95	1945.6	2012.45	-1.10418	0.194408	0.247718	-1.00764	0.887925	1	-1.11261	0.0980373	0.154936
AS-tDR-007276	-	-	chr10.trna1309-ValAAC	1	32	GTTTCCGTAGTGTAGTGGTTATCACGTTCGCCTAACACGCGAAAGGTCCCCGGTTCGAAACCGGGCGGAAACACCA	76	)))))))..)))..........(((.))))).......(((((.....))))).......((((((((((((.	GTTTCCGTAGTGTAGTGGTTATCACGTTCGCT	tiRNA-5	32	32C>T	260	179	184	206	408	402	510	415	567	338	343	485	2659.87	2690.39	2541.05	2563.75	2482.46	2476.73	2062.16	2114.08	2542.98	2115.02	2239.4	2398.13	-1.14439	0.0324862	0.0528009	1.01752	0.794364	1	-1.12469	0.0274018	0.0649438
AS-tDR-005435	-	-	chr10.trna1309-ValAAC	2	23	GTTTCCGTAGTGTAGTGGTTATCACGTTCGCCTAACACGCGAAAGGTCCCCGGTTCGAAACCGGGCGGAAACACCA	76	)))))))..)))..........(((.))))).......(((((.....))))).......((((((((((((.	TTTCCGTAGTGTAGTGGTTATC	tRF-5	22	ExactMatch	352	280	275	317	202	228	300	224	276	363	414	469	3601.06	4208.44	3797.77	3945.19	1229.06	1404.71	1213.03	1141.09	1237.85	2271.46	2702.95	2319.02	-3.11634	1.41141e-06	0.000125891	1.70983	0.03195	0.245845	-1.82261	0.00204843	0.015804
AS-tDR-010786	-	-	chr10.trna1309-ValAAC	2	23	GTTTCCGTAGTGTAGTGGTTATCACGTTCGCCTAACACGCGAAAGGTCCCCGGTTCGAAACCGGGCGGAAACACCA	76	)))))))..)))..........(((.))))).......(((((.....))))).......((((((((((((.	TTTCCGTAGTGTAGTGGTTATT	tRF-5	22	22C>T	245	169	181	210	204	171	206	182	209	260	257	274	2506.42	2540.09	2499.62	2613.53	1241.23	1053.53	832.949	927.138	937.358	1626.94	1677.92	1354.82	-2.50407	3.07076e-06	0.000172766	1.37996	0.0902417	0.351095	-1.8146	0.000558268	0.00544423
AS-tDR-007910	-	-	chr10.trna1315-ValAAC	1	23	GTTTCCGTAGTGTAGTGGTTATCACGTTCGCCTAACACGCGAAAGGTCCCCGGTTCGAAACCGGGCGGAAACACCA	76	)))))))..)))..........(((.))))).......(((((.....))))).......((((((((((((.	GTTTCCGTAGTGTAGTGGTTATA	tRF-5	23	23C>A	350	128	171	150	93	128	161	135	142	151	159	174	3580.6	1923.86	2361.52	1866.81	565.855	788.61	650.994	687.712	636.866	944.878	1038.09	860.36	-3.61	0.00461169	0.0130917	1.2918	0.0899023	0.351095	-2.79456	0.00857553	0.0330812
AS-tDR-000052	-	-	chr10.trna1315-ValAAC	1	23	GTTTCCGTAGTGTAGTGGTTATCACGTTCGCCTAACACGCGAAAGGTCCCCGGTTCGAAACCGGGCGGAAACACCA	76	)))))))..)))..........(((.))))).......(((((.....))))).......((((((((((((.	GTTTCCGTAGTGTAGTGGTTATC	tRF-5	23	ExactMatch	1719	577	783	672	543	569	733	591	700	802	728	973	17585.9	8672.39	10813.3	8363.31	3303.86	3505.62	2963.84	3010.65	3139.48	5018.49	4753.01	4811.09	-3.55325	0.00899961	0.0198741	1.38615	0.0342665	0.245845	-2.56339	0.0194579	0.0530631
AS-tDR-007919	-	-	chr10.trna1315-ValAAC	1	23	GTTTCCGTAGTGTAGTGGTTATCACGTTCGCCTAACACGCGAAAGGTCCCCGGTTCGAAACCGGGCGGAAACACCA	76	)))))))..)))..........(((.))))).......(((((.....))))).......((((((((((((.	GTTTCCGTAGTGTAGTGGTTATT	tRF-5	23	23C>T	1183	397	592	483	416	406	526	489	516	535	518	564	12102.4	5966.96	8175.55	6011.13	2531.14	2501.37	2126.85	2491.05	2314.24	3347.75	3381.95	2788.75	-3.34149	0.00787369	0.0186865	1.22604	0.091206	0.351095	-2.72543	0.0130088	0.0436453
AS-tDR-001449	-	-	chr10.trna1315-ValAAC	1	32	GTTTCCGTAGTGTAGTGGTTATCACGTTCGCCTAACACGCGAAAGGTCCCCGGTTCGAAACCGGGCGGAAACACCA	76	)))))))..)))..........(((.))))).......(((((.....))))).......((((((((((((.	GTTTCCGTAGTGTAGTGGTTATCACGTTCGCC	tiRNA-5	32	ExactMatch	233	142	154	151	331	348	431	357	414	295	298	407	2383.66	2134.28	2126.75	1879.25	2013.96	2144.03	1742.72	1818.62	1856.78	1845.95	1945.6	2012.45	-1.10418	0.194408	0.247718	-1.00764	0.887925	1	-1.11261	0.0980373	0.154936
AS-tDR-007276	-	-	chr10.trna1315-ValAAC	1	32	GTTTCCGTAGTGTAGTGGTTATCACGTTCGCCTAACACGCGAAAGGTCCCCGGTTCGAAACCGGGCGGAAACACCA	76	)))))))..)))..........(((.))))).......(((((.....))))).......((((((((((((.	GTTTCCGTAGTGTAGTGGTTATCACGTTCGCT	tiRNA-5	32	32C>T	260	179	184	206	408	402	510	415	567	338	343	485	2659.87	2690.39	2541.05	2563.75	2482.46	2476.73	2062.16	2114.08	2542.98	2115.02	2239.4	2398.13	-1.14439	0.0324862	0.0528009	1.01752	0.794364	1	-1.12469	0.0274018	0.0649438
AS-tDR-005435	-	-	chr10.trna1315-ValAAC	2	23	GTTTCCGTAGTGTAGTGGTTATCACGTTCGCCTAACACGCGAAAGGTCCCCGGTTCGAAACCGGGCGGAAACACCA	76	)))))))..)))..........(((.))))).......(((((.....))))).......((((((((((((.	TTTCCGTAGTGTAGTGGTTATC	tRF-5	22	ExactMatch	352	280	275	317	202	228	300	224	276	363	414	469	3601.06	4208.44	3797.77	3945.19	1229.06	1404.71	1213.03	1141.09	1237.85	2271.46	2702.95	2319.02	-3.11634	1.41141e-06	0.000125891	1.70983	0.03195	0.245845	-1.82261	0.00204843	0.015804
AS-tDR-010786	-	-	chr10.trna1315-ValAAC	2	23	GTTTCCGTAGTGTAGTGGTTATCACGTTCGCCTAACACGCGAAAGGTCCCCGGTTCGAAACCGGGCGGAAACACCA	76	)))))))..)))..........(((.))))).......(((((.....))))).......((((((((((((.	TTTCCGTAGTGTAGTGGTTATT	tRF-5	22	22C>T	245	169	181	210	204	171	206	182	209	260	257	274	2506.42	2540.09	2499.62	2613.53	1241.23	1053.53	832.949	927.138	937.358	1626.94	1677.92	1354.82	-2.50407	3.07076e-06	0.000172766	1.37996	0.0902417	0.351095	-1.8146	0.000558268	0.00544423
AS-tDR-007910	-	-	chr2.trna9605-ValAAC	1	23	GTTTCCGTAGTGTAGTGGTTATCACGTTCGCCTAACACGCGAAAGGTCCCCGGTTCGAAACCGGGCGGAAACACCA	76	)))))))..)))..........(((.))))).......(((((.....))))).......((((((((((((.	GTTTCCGTAGTGTAGTGGTTATA	tRF-5	23	23C>A	350	128	171	150	93	128	161	135	142	151	159	174	3580.6	1923.86	2361.52	1866.81	565.855	788.61	650.994	687.712	636.866	944.878	1038.09	860.36	-3.61	0.00461169	0.0130917	1.2918	0.0899023	0.351095	-2.79456	0.00857553	0.0330812
AS-tDR-000052	-	-	chr2.trna9605-ValAAC	1	23	GTTTCCGTAGTGTAGTGGTTATCACGTTCGCCTAACACGCGAAAGGTCCCCGGTTCGAAACCGGGCGGAAACACCA	76	)))))))..)))..........(((.))))).......(((((.....))))).......((((((((((((.	GTTTCCGTAGTGTAGTGGTTATC	tRF-5	23	ExactMatch	1719	577	783	672	543	569	733	591	700	802	728	973	17585.9	8672.39	10813.3	8363.31	3303.86	3505.62	2963.84	3010.65	3139.48	5018.49	4753.01	4811.09	-3.55325	0.00899961	0.0198741	1.38615	0.0342665	0.245845	-2.56339	0.0194579	0.0530631
AS-tDR-007919	-	-	chr2.trna9605-ValAAC	1	23	GTTTCCGTAGTGTAGTGGTTATCACGTTCGCCTAACACGCGAAAGGTCCCCGGTTCGAAACCGGGCGGAAACACCA	76	)))))))..)))..........(((.))))).......(((((.....))))).......((((((((((((.	GTTTCCGTAGTGTAGTGGTTATT	tRF-5	23	23C>T	1183	397	592	483	416	406	526	489	516	535	518	564	12102.4	5966.96	8175.55	6011.13	2531.14	2501.37	2126.85	2491.05	2314.24	3347.75	3381.95	2788.75	-3.34149	0.00787369	0.0186865	1.22604	0.091206	0.351095	-2.72543	0.0130088	0.0436453
AS-tDR-001449	-	-	chr2.trna9605-ValAAC	1	32	GTTTCCGTAGTGTAGTGGTTATCACGTTCGCCTAACACGCGAAAGGTCCCCGGTTCGAAACCGGGCGGAAACACCA	76	)))))))..)))..........(((.))))).......(((((.....))))).......((((((((((((.	GTTTCCGTAGTGTAGTGGTTATCACGTTCGCC	tiRNA-5	32	ExactMatch	233	142	154	151	331	348	431	357	414	295	298	407	2383.66	2134.28	2126.75	1879.25	2013.96	2144.03	1742.72	1818.62	1856.78	1845.95	1945.6	2012.45	-1.10418	0.194408	0.247718	-1.00764	0.887925	1	-1.11261	0.0980373	0.154936
AS-tDR-007276	-	-	chr2.trna9605-ValAAC	1	32	GTTTCCGTAGTGTAGTGGTTATCACGTTCGCCTAACACGCGAAAGGTCCCCGGTTCGAAACCGGGCGGAAACACCA	76	)))))))..)))..........(((.))))).......(((((.....))))).......((((((((((((.	GTTTCCGTAGTGTAGTGGTTATCACGTTCGCT	tiRNA-5	32	32C>T	260	179	184	206	408	402	510	415	567	338	343	485	2659.87	2690.39	2541.05	2563.75	2482.46	2476.73	2062.16	2114.08	2542.98	2115.02	2239.4	2398.13	-1.14439	0.0324862	0.0528009	1.01752	0.794364	1	-1.12469	0.0274018	0.0649438
AS-tDR-005435	-	-	chr2.trna9605-ValAAC	2	23	GTTTCCGTAGTGTAGTGGTTATCACGTTCGCCTAACACGCGAAAGGTCCCCGGTTCGAAACCGGGCGGAAACACCA	76	)))))))..)))..........(((.))))).......(((((.....))))).......((((((((((((.	TTTCCGTAGTGTAGTGGTTATC	tRF-5	22	ExactMatch	352	280	275	317	202	228	300	224	276	363	414	469	3601.06	4208.44	3797.77	3945.19	1229.06	1404.71	1213.03	1141.09	1237.85	2271.46	2702.95	2319.02	-3.11634	1.41141e-06	0.000125891	1.70983	0.03195	0.245845	-1.82261	0.00204843	0.015804
AS-tDR-010786	-	-	chr2.trna9605-ValAAC	2	23	GTTTCCGTAGTGTAGTGGTTATCACGTTCGCCTAACACGCGAAAGGTCCCCGGTTCGAAACCGGGCGGAAACACCA	76	)))))))..)))..........(((.))))).......(((((.....))))).......((((((((((((.	TTTCCGTAGTGTAGTGGTTATT	tRF-5	22	22C>T	245	169	181	210	204	171	206	182	209	260	257	274	2506.42	2540.09	2499.62	2613.53	1241.23	1053.53	832.949	927.138	937.358	1626.94	1677.92	1354.82	-2.50407	3.07076e-06	0.000172766	1.37996	0.0902417	0.351095	-1.8146	0.000558268	0.00544423
AS-tDR-007910	-	-	chr3.trna11056-ValAAC	1	23	GTTTCCGTAGTGTAGTGGTTATCACGTTCGCCTAACACGCGAAAGGTCCCCGGTTCGAAACCGGGCGGAAACACCA	76	)))))))..)))..........(((.))))).......(((((.....))))).......((((((((((((.	GTTTCCGTAGTGTAGTGGTTATA	tRF-5	23	23C>A	350	128	171	150	93	128	161	135	142	151	159	174	3580.6	1923.86	2361.52	1866.81	565.855	788.61	650.994	687.712	636.866	944.878	1038.09	860.36	-3.61	0.00461169	0.0130917	1.2918	0.0899023	0.351095	-2.79456	0.00857553	0.0330812
AS-tDR-000052	-	-	chr3.trna11056-ValAAC	1	23	GTTTCCGTAGTGTAGTGGTTATCACGTTCGCCTAACACGCGAAAGGTCCCCGGTTCGAAACCGGGCGGAAACACCA	76	)))))))..)))..........(((.))))).......(((((.....))))).......((((((((((((.	GTTTCCGTAGTGTAGTGGTTATC	tRF-5	23	ExactMatch	1719	577	783	672	543	569	733	591	700	802	728	973	17585.9	8672.39	10813.3	8363.31	3303.86	3505.62	2963.84	3010.65	3139.48	5018.49	4753.01	4811.09	-3.55325	0.00899961	0.0198741	1.38615	0.0342665	0.245845	-2.56339	0.0194579	0.0530631
AS-tDR-007919	-	-	chr3.trna11056-ValAAC	1	23	GTTTCCGTAGTGTAGTGGTTATCACGTTCGCCTAACACGCGAAAGGTCCCCGGTTCGAAACCGGGCGGAAACACCA	76	)))))))..)))..........(((.))))).......(((((.....))))).......((((((((((((.	GTTTCCGTAGTGTAGTGGTTATT	tRF-5	23	23C>T	1183	397	592	483	416	406	526	489	516	535	518	564	12102.4	5966.96	8175.55	6011.13	2531.14	2501.37	2126.85	2491.05	2314.24	3347.75	3381.95	2788.75	-3.34149	0.00787369	0.0186865	1.22604	0.091206	0.351095	-2.72543	0.0130088	0.0436453
AS-tDR-001449	-	-	chr3.trna11056-ValAAC	1	32	GTTTCCGTAGTGTAGTGGTTATCACGTTCGCCTAACACGCGAAAGGTCCCCGGTTCGAAACCGGGCGGAAACACCA	76	)))))))..)))..........(((.))))).......(((((.....))))).......((((((((((((.	GTTTCCGTAGTGTAGTGGTTATCACGTTCGCC	tiRNA-5	32	ExactMatch	233	142	154	151	331	348	431	357	414	295	298	407	2383.66	2134.28	2126.75	1879.25	2013.96	2144.03	1742.72	1818.62	1856.78	1845.95	1945.6	2012.45	-1.10418	0.194408	0.247718	-1.00764	0.887925	1	-1.11261	0.0980373	0.154936
AS-tDR-007276	-	-	chr3.trna11056-ValAAC	1	32	GTTTCCGTAGTGTAGTGGTTATCACGTTCGCCTAACACGCGAAAGGTCCCCGGTTCGAAACCGGGCGGAAACACCA	76	)))))))..)))..........(((.))))).......(((((.....))))).......((((((((((((.	GTTTCCGTAGTGTAGTGGTTATCACGTTCGCT	tiRNA-5	32	32C>T	260	179	184	206	408	402	510	415	567	338	343	485	2659.87	2690.39	2541.05	2563.75	2482.46	2476.73	2062.16	2114.08	2542.98	2115.02	2239.4	2398.13	-1.14439	0.0324862	0.0528009	1.01752	0.794364	1	-1.12469	0.0274018	0.0649438
AS-tDR-005435	-	-	chr3.trna11056-ValAAC	2	23	GTTTCCGTAGTGTAGTGGTTATCACGTTCGCCTAACACGCGAAAGGTCCCCGGTTCGAAACCGGGCGGAAACACCA	76	)))))))..)))..........(((.))))).......(((((.....))))).......((((((((((((.	TTTCCGTAGTGTAGTGGTTATC	tRF-5	22	ExactMatch	352	280	275	317	202	228	300	224	276	363	414	469	3601.06	4208.44	3797.77	3945.19	1229.06	1404.71	1213.03	1141.09	1237.85	2271.46	2702.95	2319.02	-3.11634	1.41141e-06	0.000125891	1.70983	0.03195	0.245845	-1.82261	0.00204843	0.015804
AS-tDR-010786	-	-	chr3.trna11056-ValAAC	2	23	GTTTCCGTAGTGTAGTGGTTATCACGTTCGCCTAACACGCGAAAGGTCCCCGGTTCGAAACCGGGCGGAAACACCA	76	)))))))..)))..........(((.))))).......(((((.....))))).......((((((((((((.	TTTCCGTAGTGTAGTGGTTATT	tRF-5	22	22C>T	245	169	181	210	204	171	206	182	209	260	257	274	2506.42	2540.09	2499.62	2613.53	1241.23	1053.53	832.949	927.138	937.358	1626.94	1677.92	1354.82	-2.50407	3.07076e-06	0.000172766	1.37996	0.0902417	0.351095	-1.8146	0.000558268	0.00544423
AS-tDR-007910	-	-	chr17.trna1601-ValCAC	1	23	GTTTCCGTAGTGTAGTGGTTATCACGTTCGCCTCACACGCGAAAGGTCCCCGGTTCGAGACCGGGCGGAAACACCA	76	)))))))..)))..........(((.))))).......(((((.....))))).......((((((((((((.	GTTTCCGTAGTGTAGTGGTTATA	tRF-5	23	23C>A	350	128	171	150	93	128	161	135	142	151	159	174	3580.6	1923.86	2361.52	1866.81	565.855	788.61	650.994	687.712	636.866	944.878	1038.09	860.36	-3.61	0.00461169	0.0130917	1.2918	0.0899023	0.351095	-2.79456	0.00857553	0.0330812
AS-tDR-000052	-	-	chr17.trna1601-ValCAC	1	23	GTTTCCGTAGTGTAGTGGTTATCACGTTCGCCTCACACGCGAAAGGTCCCCGGTTCGAGACCGGGCGGAAACACCA	76	)))))))..)))..........(((.))))).......(((((.....))))).......((((((((((((.	GTTTCCGTAGTGTAGTGGTTATC	tRF-5	23	ExactMatch	1719	577	783	672	543	569	733	591	700	802	728	973	17585.9	8672.39	10813.3	8363.31	3303.86	3505.62	2963.84	3010.65	3139.48	5018.49	4753.01	4811.09	-3.55325	0.00899961	0.0198741	1.38615	0.0342665	0.245845	-2.56339	0.0194579	0.0530631
AS-tDR-007919	-	-	chr17.trna1601-ValCAC	1	23	GTTTCCGTAGTGTAGTGGTTATCACGTTCGCCTCACACGCGAAAGGTCCCCGGTTCGAGACCGGGCGGAAACACCA	76	)))))))..)))..........(((.))))).......(((((.....))))).......((((((((((((.	GTTTCCGTAGTGTAGTGGTTATT	tRF-5	23	23C>T	1183	397	592	483	416	406	526	489	516	535	518	564	12102.4	5966.96	8175.55	6011.13	2531.14	2501.37	2126.85	2491.05	2314.24	3347.75	3381.95	2788.75	-3.34149	0.00787369	0.0186865	1.22604	0.091206	0.351095	-2.72543	0.0130088	0.0436453
AS-tDR-001449	-	-	chr17.trna1601-ValCAC	1	32	GTTTCCGTAGTGTAGTGGTTATCACGTTCGCCTCACACGCGAAAGGTCCCCGGTTCGAGACCGGGCGGAAACACCA	76	)))))))..)))..........(((.))))).......(((((.....))))).......((((((((((((.	GTTTCCGTAGTGTAGTGGTTATCACGTTCGCC	tiRNA-5	32	ExactMatch	233	142	154	151	331	348	431	357	414	295	298	407	2383.66	2134.28	2126.75	1879.25	2013.96	2144.03	1742.72	1818.62	1856.78	1845.95	1945.6	2012.45	-1.10418	0.194408	0.247718	-1.00764	0.887925	1	-1.11261	0.0980373	0.154936
AS-tDR-007276	-	-	chr17.trna1601-ValCAC	1	32	GTTTCCGTAGTGTAGTGGTTATCACGTTCGCCTCACACGCGAAAGGTCCCCGGTTCGAGACCGGGCGGAAACACCA	76	)))))))..)))..........(((.))))).......(((((.....))))).......((((((((((((.	GTTTCCGTAGTGTAGTGGTTATCACGTTCGCT	tiRNA-5	32	32C>T	260	179	184	206	408	402	510	415	567	338	343	485	2659.87	2690.39	2541.05	2563.75	2482.46	2476.73	2062.16	2114.08	2542.98	2115.02	2239.4	2398.13	-1.14439	0.0324862	0.0528009	1.01752	0.794364	1	-1.12469	0.0274018	0.0649438
AS-tDR-005435	-	-	chr17.trna1601-ValCAC	2	23	GTTTCCGTAGTGTAGTGGTTATCACGTTCGCCTCACACGCGAAAGGTCCCCGGTTCGAGACCGGGCGGAAACACCA	76	)))))))..)))..........(((.))))).......(((((.....))))).......((((((((((((.	TTTCCGTAGTGTAGTGGTTATC	tRF-5	22	ExactMatch	352	280	275	317	202	228	300	224	276	363	414	469	3601.06	4208.44	3797.77	3945.19	1229.06	1404.71	1213.03	1141.09	1237.85	2271.46	2702.95	2319.02	-3.11634	1.41141e-06	0.000125891	1.70983	0.03195	0.245845	-1.82261	0.00204843	0.015804
AS-tDR-010786	-	-	chr17.trna1601-ValCAC	2	23	GTTTCCGTAGTGTAGTGGTTATCACGTTCGCCTCACACGCGAAAGGTCCCCGGTTCGAGACCGGGCGGAAACACCA	76	)))))))..)))..........(((.))))).......(((((.....))))).......((((((((((((.	TTTCCGTAGTGTAGTGGTTATT	tRF-5	22	22C>T	245	169	181	210	204	171	206	182	209	260	257	274	2506.42	2540.09	2499.62	2613.53	1241.23	1053.53	832.949	927.138	937.358	1626.94	1677.92	1354.82	-2.50407	3.07076e-06	0.000172766	1.37996	0.0902417	0.351095	-1.8146	0.000558268	0.00544423
AS-tDR-007910	-	-	pre-chr2.trna4363-ValCAC	41	63	ATTCTTATGTAATCTCTCAGAGGCGCTCTTCCAACAGGCAGTTTCCGTAGTGTAGTGGTTATCACGTTCGCCTCACACGCGAAAGGTCCCCGGTTCGAAACCGGGCGGAAACACTTGGTCTCCTTTTAACCAATTTATGGTTACCACAATGGG	153	...(((((((.........(((((......((....))..(((((((..((((.(.(((.(......).))).))))).(....)...((((((.....))))))))))))).....)))))....((((((.....))))))..)).)))))	GTTTCCGTAGTGTAGTGGTTATA	Other	23	23C>A	350	128	171	150	93	128	161	135	142	151	159	174	3580.6	1923.86	2361.52	1866.81	565.855	788.61	650.994	687.712	636.866	944.878	1038.09	860.36	-3.61	0.00461169	0.0130917	1.2918	0.0899023	0.351095	-2.79456	0.00857553	0.0330812
AS-tDR-000052	-	-	pre-chr2.trna4363-ValCAC	41	63	ATTCTTATGTAATCTCTCAGAGGCGCTCTTCCAACAGGCAGTTTCCGTAGTGTAGTGGTTATCACGTTCGCCTCACACGCGAAAGGTCCCCGGTTCGAAACCGGGCGGAAACACTTGGTCTCCTTTTAACCAATTTATGGTTACCACAATGGG	153	...(((((((.........(((((......((....))..(((((((..((((.(.(((.(......).))).))))).(....)...((((((.....))))))))))))).....)))))....((((((.....))))))..)).)))))	GTTTCCGTAGTGTAGTGGTTATC	Other	23	ExactMatch	1719	577	783	672	543	569	733	591	700	802	728	973	17585.9	8672.39	10813.3	8363.31	3303.86	3505.62	2963.84	3010.65	3139.48	5018.49	4753.01	4811.09	-3.55325	0.00899961	0.0198741	1.38615	0.0342665	0.245845	-2.56339	0.0194579	0.0530631
AS-tDR-007919	-	-	pre-chr2.trna4363-ValCAC	41	63	ATTCTTATGTAATCTCTCAGAGGCGCTCTTCCAACAGGCAGTTTCCGTAGTGTAGTGGTTATCACGTTCGCCTCACACGCGAAAGGTCCCCGGTTCGAAACCGGGCGGAAACACTTGGTCTCCTTTTAACCAATTTATGGTTACCACAATGGG	153	...(((((((.........(((((......((....))..(((((((..((((.(.(((.(......).))).))))).(....)...((((((.....))))))))))))).....)))))....((((((.....))))))..)).)))))	GTTTCCGTAGTGTAGTGGTTATT	Other	23	23C>T	1183	397	592	483	416	406	526	489	516	535	518	564	12102.4	5966.96	8175.55	6011.13	2531.14	2501.37	2126.85	2491.05	2314.24	3347.75	3381.95	2788.75	-3.34149	0.00787369	0.0186865	1.22604	0.091206	0.351095	-2.72543	0.0130088	0.0436453
AS-tDR-001449	-	-	pre-chr2.trna4363-ValCAC	41	72	ATTCTTATGTAATCTCTCAGAGGCGCTCTTCCAACAGGCAGTTTCCGTAGTGTAGTGGTTATCACGTTCGCCTCACACGCGAAAGGTCCCCGGTTCGAAACCGGGCGGAAACACTTGGTCTCCTTTTAACCAATTTATGGTTACCACAATGGG	153	...(((((((.........(((((......((....))..(((((((..((((.(.(((.(......).))).))))).(....)...((((((.....))))))))))))).....)))))....((((((.....))))))..)).)))))	GTTTCCGTAGTGTAGTGGTTATCACGTTCGCC	Other	32	ExactMatch	233	142	154	151	331	348	431	357	414	295	298	407	2383.66	2134.28	2126.75	1879.25	2013.96	2144.03	1742.72	1818.62	1856.78	1845.95	1945.6	2012.45	-1.10418	0.194408	0.247718	-1.00764	0.887925	1	-1.11261	0.0980373	0.154936
AS-tDR-007276	-	-	pre-chr2.trna4363-ValCAC	41	72	ATTCTTATGTAATCTCTCAGAGGCGCTCTTCCAACAGGCAGTTTCCGTAGTGTAGTGGTTATCACGTTCGCCTCACACGCGAAAGGTCCCCGGTTCGAAACCGGGCGGAAACACTTGGTCTCCTTTTAACCAATTTATGGTTACCACAATGGG	153	...(((((((.........(((((......((....))..(((((((..((((.(.(((.(......).))).))))).(....)...((((((.....))))))))))))).....)))))....((((((.....))))))..)).)))))	GTTTCCGTAGTGTAGTGGTTATCACGTTCGCT	Other	32	32C>T	260	179	184	206	408	402	510	415	567	338	343	485	2659.87	2690.39	2541.05	2563.75	2482.46	2476.73	2062.16	2114.08	2542.98	2115.02	2239.4	2398.13	-1.14439	0.0324862	0.0528009	1.01752	0.794364	1	-1.12469	0.0274018	0.0649438
AS-tDR-005435	-	-	pre-chr2.trna4363-ValCAC	42	63	ATTCTTATGTAATCTCTCAGAGGCGCTCTTCCAACAGGCAGTTTCCGTAGTGTAGTGGTTATCACGTTCGCCTCACACGCGAAAGGTCCCCGGTTCGAAACCGGGCGGAAACACTTGGTCTCCTTTTAACCAATTTATGGTTACCACAATGGG	153	...(((((((.........(((((......((....))..(((((((..((((.(.(((.(......).))).))))).(....)...((((((.....))))))))))))).....)))))....((((((.....))))))..)).)))))	TTTCCGTAGTGTAGTGGTTATC	Other	22	ExactMatch	352	280	275	317	202	228	300	224	276	363	414	469	3601.06	4208.44	3797.77	3945.19	1229.06	1404.71	1213.03	1141.09	1237.85	2271.46	2702.95	2319.02	-3.11634	1.41141e-06	0.000125891	1.70983	0.03195	0.245845	-1.82261	0.00204843	0.015804
AS-tDR-010786	-	-	pre-chr2.trna4363-ValCAC	42	63	ATTCTTATGTAATCTCTCAGAGGCGCTCTTCCAACAGGCAGTTTCCGTAGTGTAGTGGTTATCACGTTCGCCTCACACGCGAAAGGTCCCCGGTTCGAAACCGGGCGGAAACACTTGGTCTCCTTTTAACCAATTTATGGTTACCACAATGGG	153	...(((((((.........(((((......((....))..(((((((..((((.(.(((.(......).))).))))).(....)...((((((.....))))))))))))).....)))))....((((((.....))))))..)).)))))	TTTCCGTAGTGTAGTGGTTATT	Other	22	22C>T	245	169	181	210	204	171	206	182	209	260	257	274	2506.42	2540.09	2499.62	2613.53	1241.23	1053.53	832.949	927.138	937.358	1626.94	1677.92	1354.82	-2.50407	3.07076e-06	0.000172766	1.37996	0.0902417	0.351095	-1.8146	0.000558268	0.00544423
AS-tDR-007910	-	-	pre-chr13.trna2253-ValCAC	41	63	TCACTTTAAGTACAGTTTATATAAGCGCAGTAGACAGCTAGTTTCCGTAGTGTAGTGGTTATCACGTTCGCCTCACACGCGAAAGGTCCCCGGTTCGAAACCGGGCGGAAACAGCTACTTCCTACTTTTTGTAGGAGGTACCTATTATTATAC	153	..............((((....))))..(((((..((((.(((((((..((((.(.(((.(......).))).))))).(....)...((((((.....)))))))))))))))))(((((((((.....)))))))))..))))).......	GTTTCCGTAGTGTAGTGGTTATA	Other	23	23C>A	350	128	171	150	93	128	161	135	142	151	159	174	3580.6	1923.86	2361.52	1866.81	565.855	788.61	650.994	687.712	636.866	944.878	1038.09	860.36	-3.61	0.00461169	0.0130917	1.2918	0.0899023	0.351095	-2.79456	0.00857553	0.0330812
AS-tDR-000052	-	-	pre-chr13.trna2253-ValCAC	41	63	TCACTTTAAGTACAGTTTATATAAGCGCAGTAGACAGCTAGTTTCCGTAGTGTAGTGGTTATCACGTTCGCCTCACACGCGAAAGGTCCCCGGTTCGAAACCGGGCGGAAACAGCTACTTCCTACTTTTTGTAGGAGGTACCTATTATTATAC	153	..............((((....))))..(((((..((((.(((((((..((((.(.(((.(......).))).))))).(....)...((((((.....)))))))))))))))))(((((((((.....)))))))))..))))).......	GTTTCCGTAGTGTAGTGGTTATC	Other	23	ExactMatch	1719	577	783	672	543	569	733	591	700	802	728	973	17585.9	8672.39	10813.3	8363.31	3303.86	3505.62	2963.84	3010.65	3139.48	5018.49	4753.01	4811.09	-3.55325	0.00899961	0.0198741	1.38615	0.0342665	0.245845	-2.56339	0.0194579	0.0530631
AS-tDR-007919	-	-	pre-chr13.trna2253-ValCAC	41	63	TCACTTTAAGTACAGTTTATATAAGCGCAGTAGACAGCTAGTTTCCGTAGTGTAGTGGTTATCACGTTCGCCTCACACGCGAAAGGTCCCCGGTTCGAAACCGGGCGGAAACAGCTACTTCCTACTTTTTGTAGGAGGTACCTATTATTATAC	153	..............((((....))))..(((((..((((.(((((((..((((.(.(((.(......).))).))))).(....)...((((((.....)))))))))))))))))(((((((((.....)))))))))..))))).......	GTTTCCGTAGTGTAGTGGTTATT	Other	23	23C>T	1183	397	592	483	416	406	526	489	516	535	518	564	12102.4	5966.96	8175.55	6011.13	2531.14	2501.37	2126.85	2491.05	2314.24	3347.75	3381.95	2788.75	-3.34149	0.00787369	0.0186865	1.22604	0.091206	0.351095	-2.72543	0.0130088	0.0436453
AS-tDR-001449	-	-	pre-chr13.trna2253-ValCAC	41	72	TCACTTTAAGTACAGTTTATATAAGCGCAGTAGACAGCTAGTTTCCGTAGTGTAGTGGTTATCACGTTCGCCTCACACGCGAAAGGTCCCCGGTTCGAAACCGGGCGGAAACAGCTACTTCCTACTTTTTGTAGGAGGTACCTATTATTATAC	153	..............((((....))))..(((((..((((.(((((((..((((.(.(((.(......).))).))))).(....)...((((((.....)))))))))))))))))(((((((((.....)))))))))..))))).......	GTTTCCGTAGTGTAGTGGTTATCACGTTCGCC	Other	32	ExactMatch	233	142	154	151	331	348	431	357	414	295	298	407	2383.66	2134.28	2126.75	1879.25	2013.96	2144.03	1742.72	1818.62	1856.78	1845.95	1945.6	2012.45	-1.10418	0.194408	0.247718	-1.00764	0.887925	1	-1.11261	0.0980373	0.154936
AS-tDR-007276	-	-	pre-chr13.trna2253-ValCAC	41	72	TCACTTTAAGTACAGTTTATATAAGCGCAGTAGACAGCTAGTTTCCGTAGTGTAGTGGTTATCACGTTCGCCTCACACGCGAAAGGTCCCCGGTTCGAAACCGGGCGGAAACAGCTACTTCCTACTTTTTGTAGGAGGTACCTATTATTATAC	153	..............((((....))))..(((((..((((.(((((((..((((.(.(((.(......).))).))))).(....)...((((((.....)))))))))))))))))(((((((((.....)))))))))..))))).......	GTTTCCGTAGTGTAGTGGTTATCACGTTCGCT	Other	32	32C>T	260	179	184	206	408	402	510	415	567	338	343	485	2659.87	2690.39	2541.05	2563.75	2482.46	2476.73	2062.16	2114.08	2542.98	2115.02	2239.4	2398.13	-1.14439	0.0324862	0.0528009	1.01752	0.794364	1	-1.12469	0.0274018	0.0649438
AS-tDR-005435	-	-	pre-chr13.trna2253-ValCAC	42	63	TCACTTTAAGTACAGTTTATATAAGCGCAGTAGACAGCTAGTTTCCGTAGTGTAGTGGTTATCACGTTCGCCTCACACGCGAAAGGTCCCCGGTTCGAAACCGGGCGGAAACAGCTACTTCCTACTTTTTGTAGGAGGTACCTATTATTATAC	153	..............((((....))))..(((((..((((.(((((((..((((.(.(((.(......).))).))))).(....)...((((((.....)))))))))))))))))(((((((((.....)))))))))..))))).......	TTTCCGTAGTGTAGTGGTTATC	Other	22	ExactMatch	352	280	275	317	202	228	300	224	276	363	414	469	3601.06	4208.44	3797.77	3945.19	1229.06	1404.71	1213.03	1141.09	1237.85	2271.46	2702.95	2319.02	-3.11634	1.41141e-06	0.000125891	1.70983	0.03195	0.245845	-1.82261	0.00204843	0.015804
AS-tDR-010786	-	-	pre-chr13.trna2253-ValCAC	42	63	TCACTTTAAGTACAGTTTATATAAGCGCAGTAGACAGCTAGTTTCCGTAGTGTAGTGGTTATCACGTTCGCCTCACACGCGAAAGGTCCCCGGTTCGAAACCGGGCGGAAACAGCTACTTCCTACTTTTTGTAGGAGGTACCTATTATTATAC	153	..............((((....))))..(((((..((((.(((((((..((((.(.(((.(......).))).))))).(....)...((((((.....)))))))))))))))))(((((((((.....)))))))))..))))).......	TTTCCGTAGTGTAGTGGTTATT	Other	22	22C>T	245	169	181	210	204	171	206	182	209	260	257	274	2506.42	2540.09	2499.62	2613.53	1241.23	1053.53	832.949	927.138	937.358	1626.94	1677.92	1354.82	-2.50407	3.07076e-06	0.000172766	1.37996	0.0902417	0.351095	-1.8146	0.000558268	0.00544423
AS-tDR-007910	-	-	pre-chr10.trna1308-ValCAC	41	63	TAGCTTTAGGAGCTTGCCGAGCAGCGCTGTAAACAGTGCGGTTTCCGTAGTGTAGTGGTTATCACGTTCGCCTCACACGCGAAAGGTCCCCGGTTCGAAACCGGGCGGAAACAGTTTTAGACCGCTTTGCAAATTCGCTTTCACAAAAATGCT	153	.(((....(((((((((.((((.((((((....)))))).(((((((..((((.(.(((.(......).))).))))).(....)...((((((.....)))))))))))))...........)))).))))....))))).........)))	GTTTCCGTAGTGTAGTGGTTATA	Other	23	23C>A	350	128	171	150	93	128	161	135	142	151	159	174	3580.6	1923.86	2361.52	1866.81	565.855	788.61	650.994	687.712	636.866	944.878	1038.09	860.36	-3.61	0.00461169	0.0130917	1.2918	0.0899023	0.351095	-2.79456	0.00857553	0.0330812
AS-tDR-000052	-	-	pre-chr10.trna1308-ValCAC	41	63	TAGCTTTAGGAGCTTGCCGAGCAGCGCTGTAAACAGTGCGGTTTCCGTAGTGTAGTGGTTATCACGTTCGCCTCACACGCGAAAGGTCCCCGGTTCGAAACCGGGCGGAAACAGTTTTAGACCGCTTTGCAAATTCGCTTTCACAAAAATGCT	153	.(((....(((((((((.((((.((((((....)))))).(((((((..((((.(.(((.(......).))).))))).(....)...((((((.....)))))))))))))...........)))).))))....))))).........)))	GTTTCCGTAGTGTAGTGGTTATC	Other	23	ExactMatch	1719	577	783	672	543	569	733	591	700	802	728	973	17585.9	8672.39	10813.3	8363.31	3303.86	3505.62	2963.84	3010.65	3139.48	5018.49	4753.01	4811.09	-3.55325	0.00899961	0.0198741	1.38615	0.0342665	0.245845	-2.56339	0.0194579	0.0530631
AS-tDR-007919	-	-	pre-chr10.trna1308-ValCAC	41	63	TAGCTTTAGGAGCTTGCCGAGCAGCGCTGTAAACAGTGCGGTTTCCGTAGTGTAGTGGTTATCACGTTCGCCTCACACGCGAAAGGTCCCCGGTTCGAAACCGGGCGGAAACAGTTTTAGACCGCTTTGCAAATTCGCTTTCACAAAAATGCT	153	.(((....(((((((((.((((.((((((....)))))).(((((((..((((.(.(((.(......).))).))))).(....)...((((((.....)))))))))))))...........)))).))))....))))).........)))	GTTTCCGTAGTGTAGTGGTTATT	Other	23	23C>T	1183	397	592	483	416	406	526	489	516	535	518	564	12102.4	5966.96	8175.55	6011.13	2531.14	2501.37	2126.85	2491.05	2314.24	3347.75	3381.95	2788.75	-3.34149	0.00787369	0.0186865	1.22604	0.091206	0.351095	-2.72543	0.0130088	0.0436453
AS-tDR-001449	-	-	pre-chr10.trna1308-ValCAC	41	72	TAGCTTTAGGAGCTTGCCGAGCAGCGCTGTAAACAGTGCGGTTTCCGTAGTGTAGTGGTTATCACGTTCGCCTCACACGCGAAAGGTCCCCGGTTCGAAACCGGGCGGAAACAGTTTTAGACCGCTTTGCAAATTCGCTTTCACAAAAATGCT	153	.(((....(((((((((.((((.((((((....)))))).(((((((..((((.(.(((.(......).))).))))).(....)...((((((.....)))))))))))))...........)))).))))....))))).........)))	GTTTCCGTAGTGTAGTGGTTATCACGTTCGCC	Other	32	ExactMatch	233	142	154	151	331	348	431	357	414	295	298	407	2383.66	2134.28	2126.75	1879.25	2013.96	2144.03	1742.72	1818.62	1856.78	1845.95	1945.6	2012.45	-1.10418	0.194408	0.247718	-1.00764	0.887925	1	-1.11261	0.0980373	0.154936
AS-tDR-007276	-	-	pre-chr10.trna1308-ValCAC	41	72	TAGCTTTAGGAGCTTGCCGAGCAGCGCTGTAAACAGTGCGGTTTCCGTAGTGTAGTGGTTATCACGTTCGCCTCACACGCGAAAGGTCCCCGGTTCGAAACCGGGCGGAAACAGTTTTAGACCGCTTTGCAAATTCGCTTTCACAAAAATGCT	153	.(((....(((((((((.((((.((((((....)))))).(((((((..((((.(.(((.(......).))).))))).(....)...((((((.....)))))))))))))...........)))).))))....))))).........)))	GTTTCCGTAGTGTAGTGGTTATCACGTTCGCT	Other	32	32C>T	260	179	184	206	408	402	510	415	567	338	343	485	2659.87	2690.39	2541.05	2563.75	2482.46	2476.73	2062.16	2114.08	2542.98	2115.02	2239.4	2398.13	-1.14439	0.0324862	0.0528009	1.01752	0.794364	1	-1.12469	0.0274018	0.0649438
AS-tDR-005435	-	-	pre-chr10.trna1308-ValCAC	42	63	TAGCTTTAGGAGCTTGCCGAGCAGCGCTGTAAACAGTGCGGTTTCCGTAGTGTAGTGGTTATCACGTTCGCCTCACACGCGAAAGGTCCCCGGTTCGAAACCGGGCGGAAACAGTTTTAGACCGCTTTGCAAATTCGCTTTCACAAAAATGCT	153	.(((....(((((((((.((((.((((((....)))))).(((((((..((((.(.(((.(......).))).))))).(....)...((((((.....)))))))))))))...........)))).))))....))))).........)))	TTTCCGTAGTGTAGTGGTTATC	Other	22	ExactMatch	352	280	275	317	202	228	300	224	276	363	414	469	3601.06	4208.44	3797.77	3945.19	1229.06	1404.71	1213.03	1141.09	1237.85	2271.46	2702.95	2319.02	-3.11634	1.41141e-06	0.000125891	1.70983	0.03195	0.245845	-1.82261	0.00204843	0.015804
AS-tDR-010786	-	-	pre-chr10.trna1308-ValCAC	42	63	TAGCTTTAGGAGCTTGCCGAGCAGCGCTGTAAACAGTGCGGTTTCCGTAGTGTAGTGGTTATCACGTTCGCCTCACACGCGAAAGGTCCCCGGTTCGAAACCGGGCGGAAACAGTTTTAGACCGCTTTGCAAATTCGCTTTCACAAAAATGCT	153	.(((....(((((((((.((((.((((((....)))))).(((((((..((((.(.(((.(......).))).))))).(....)...((((((.....)))))))))))))...........)))).))))....))))).........)))	TTTCCGTAGTGTAGTGGTTATT	Other	22	22C>T	245	169	181	210	204	171	206	182	209	260	257	274	2506.42	2540.09	2499.62	2613.53	1241.23	1053.53	832.949	927.138	937.358	1626.94	1677.92	1354.82	-2.50407	3.07076e-06	0.000172766	1.37996	0.0902417	0.351095	-1.8146	0.000558268	0.00544423
AS-tDR-007910	-	-	pre-chr17.trna1601-ValCAC	41	63	CGAGAGATGGCTTAATACAAAGCGATAGCACCAGTAGCTAGTTTCCGTAGTGTAGTGGTTATCACGTTCGCCTCACACGCGAAAGGTCCCCGGTTCGAGACCGGGCGGAAACAGCGGTGGTTTCCATTTTGTTCTTGTGAAGGCGGAATCTGG	153	(.((((((((((...((((..(((.((((.......)))).....)))..))))..)))))))...(((((((((((.((((((....(((((((...))))))).((((((.......)))))).))))))...)))).))))))).))).)	GTTTCCGTAGTGTAGTGGTTATA	Other	23	23C>A	350	128	171	150	93	128	161	135	142	151	159	174	3580.6	1923.86	2361.52	1866.81	565.855	788.61	650.994	687.712	636.866	944.878	1038.09	860.36	-3.61	0.00461169	0.0130917	1.2918	0.0899023	0.351095	-2.79456	0.00857553	0.0330812
AS-tDR-000052	-	-	pre-chr17.trna1601-ValCAC	41	63	CGAGAGATGGCTTAATACAAAGCGATAGCACCAGTAGCTAGTTTCCGTAGTGTAGTGGTTATCACGTTCGCCTCACACGCGAAAGGTCCCCGGTTCGAGACCGGGCGGAAACAGCGGTGGTTTCCATTTTGTTCTTGTGAAGGCGGAATCTGG	153	(.((((((((((...((((..(((.((((.......)))).....)))..))))..)))))))...(((((((((((.((((((....(((((((...))))))).((((((.......)))))).))))))...)))).))))))).))).)	GTTTCCGTAGTGTAGTGGTTATC	Other	23	ExactMatch	1719	577	783	672	543	569	733	591	700	802	728	973	17585.9	8672.39	10813.3	8363.31	3303.86	3505.62	2963.84	3010.65	3139.48	5018.49	4753.01	4811.09	-3.55325	0.00899961	0.0198741	1.38615	0.0342665	0.245845	-2.56339	0.0194579	0.0530631
AS-tDR-007919	-	-	pre-chr17.trna1601-ValCAC	41	63	CGAGAGATGGCTTAATACAAAGCGATAGCACCAGTAGCTAGTTTCCGTAGTGTAGTGGTTATCACGTTCGCCTCACACGCGAAAGGTCCCCGGTTCGAGACCGGGCGGAAACAGCGGTGGTTTCCATTTTGTTCTTGTGAAGGCGGAATCTGG	153	(.((((((((((...((((..(((.((((.......)))).....)))..))))..)))))))...(((((((((((.((((((....(((((((...))))))).((((((.......)))))).))))))...)))).))))))).))).)	GTTTCCGTAGTGTAGTGGTTATT	Other	23	23C>T	1183	397	592	483	416	406	526	489	516	535	518	564	12102.4	5966.96	8175.55	6011.13	2531.14	2501.37	2126.85	2491.05	2314.24	3347.75	3381.95	2788.75	-3.34149	0.00787369	0.0186865	1.22604	0.091206	0.351095	-2.72543	0.0130088	0.0436453
AS-tDR-001449	-	-	pre-chr17.trna1601-ValCAC	41	72	CGAGAGATGGCTTAATACAAAGCGATAGCACCAGTAGCTAGTTTCCGTAGTGTAGTGGTTATCACGTTCGCCTCACACGCGAAAGGTCCCCGGTTCGAGACCGGGCGGAAACAGCGGTGGTTTCCATTTTGTTCTTGTGAAGGCGGAATCTGG	153	(.((((((((((...((((..(((.((((.......)))).....)))..))))..)))))))...(((((((((((.((((((....(((((((...))))))).((((((.......)))))).))))))...)))).))))))).))).)	GTTTCCGTAGTGTAGTGGTTATCACGTTCGCC	Other	32	ExactMatch	233	142	154	151	331	348	431	357	414	295	298	407	2383.66	2134.28	2126.75	1879.25	2013.96	2144.03	1742.72	1818.62	1856.78	1845.95	1945.6	2012.45	-1.10418	0.194408	0.247718	-1.00764	0.887925	1	-1.11261	0.0980373	0.154936
AS-tDR-007276	-	-	pre-chr17.trna1601-ValCAC	41	72	CGAGAGATGGCTTAATACAAAGCGATAGCACCAGTAGCTAGTTTCCGTAGTGTAGTGGTTATCACGTTCGCCTCACACGCGAAAGGTCCCCGGTTCGAGACCGGGCGGAAACAGCGGTGGTTTCCATTTTGTTCTTGTGAAGGCGGAATCTGG	153	(.((((((((((...((((..(((.((((.......)))).....)))..))))..)))))))...(((((((((((.((((((....(((((((...))))))).((((((.......)))))).))))))...)))).))))))).))).)	GTTTCCGTAGTGTAGTGGTTATCACGTTCGCT	Other	32	32C>T	260	179	184	206	408	402	510	415	567	338	343	485	2659.87	2690.39	2541.05	2563.75	2482.46	2476.73	2062.16	2114.08	2542.98	2115.02	2239.4	2398.13	-1.14439	0.0324862	0.0528009	1.01752	0.794364	1	-1.12469	0.0274018	0.0649438
AS-tDR-005435	-	-	pre-chr17.trna1601-ValCAC	42	63	CGAGAGATGGCTTAATACAAAGCGATAGCACCAGTAGCTAGTTTCCGTAGTGTAGTGGTTATCACGTTCGCCTCACACGCGAAAGGTCCCCGGTTCGAGACCGGGCGGAAACAGCGGTGGTTTCCATTTTGTTCTTGTGAAGGCGGAATCTGG	153	(.((((((((((...((((..(((.((((.......)))).....)))..))))..)))))))...(((((((((((.((((((....(((((((...))))))).((((((.......)))))).))))))...)))).))))))).))).)	TTTCCGTAGTGTAGTGGTTATC	Other	22	ExactMatch	352	280	275	317	202	228	300	224	276	363	414	469	3601.06	4208.44	3797.77	3945.19	1229.06	1404.71	1213.03	1141.09	1237.85	2271.46	2702.95	2319.02	-3.11634	1.41141e-06	0.000125891	1.70983	0.03195	0.245845	-1.82261	0.00204843	0.015804
AS-tDR-010786	-	-	pre-chr17.trna1601-ValCAC	42	63	CGAGAGATGGCTTAATACAAAGCGATAGCACCAGTAGCTAGTTTCCGTAGTGTAGTGGTTATCACGTTCGCCTCACACGCGAAAGGTCCCCGGTTCGAGACCGGGCGGAAACAGCGGTGGTTTCCATTTTGTTCTTGTGAAGGCGGAATCTGG	153	(.((((((((((...((((..(((.((((.......)))).....)))..))))..)))))))...(((((((((((.((((((....(((((((...))))))).((((((.......)))))).))))))...)))).))))))).))).)	TTTCCGTAGTGTAGTGGTTATT	Other	22	22C>T	245	169	181	210	204	171	206	182	209	260	257	274	2506.42	2540.09	2499.62	2613.53	1241.23	1053.53	832.949	927.138	937.358	1626.94	1677.92	1354.82	-2.50407	3.07076e-06	0.000172766	1.37996	0.0902417	0.351095	-1.8146	0.000558268	0.00544423
AS-tDR-007910	-	-	pre-chr2.trna9605-ValAAC	41	63	GAACATAAGAGGAACTATTTCAGCAAGAGGAGGCAGCCAGGTTTCCGTAGTGTAGTGGTTATCACGTTCGCCTAACACGCGAAAGGTCCCCGGTTCGAAACCGGGCGGAAACACGATTTTTATAACCAATAACAGACAGGAAAACACCAAACA	153	..........((..((.((((.....)))).))...)).(((((((((..(((..(((((((..(.(((((.......))))).)...((((((.....)))))).(....).........)))))))...))).)).))))...))).....	GTTTCCGTAGTGTAGTGGTTATA	Other	23	23C>A	350	128	171	150	93	128	161	135	142	151	159	174	3580.6	1923.86	2361.52	1866.81	565.855	788.61	650.994	687.712	636.866	944.878	1038.09	860.36	-3.61	0.00461169	0.0130917	1.2918	0.0899023	0.351095	-2.79456	0.00857553	0.0330812
AS-tDR-000052	-	-	pre-chr2.trna9605-ValAAC	41	63	GAACATAAGAGGAACTATTTCAGCAAGAGGAGGCAGCCAGGTTTCCGTAGTGTAGTGGTTATCACGTTCGCCTAACACGCGAAAGGTCCCCGGTTCGAAACCGGGCGGAAACACGATTTTTATAACCAATAACAGACAGGAAAACACCAAACA	153	..........((..((.((((.....)))).))...)).(((((((((..(((..(((((((..(.(((((.......))))).)...((((((.....)))))).(....).........)))))))...))).)).))))...))).....	GTTTCCGTAGTGTAGTGGTTATC	Other	23	ExactMatch	1719	577	783	672	543	569	733	591	700	802	728	973	17585.9	8672.39	10813.3	8363.31	3303.86	3505.62	2963.84	3010.65	3139.48	5018.49	4753.01	4811.09	-3.55325	0.00899961	0.0198741	1.38615	0.0342665	0.245845	-2.56339	0.0194579	0.0530631
AS-tDR-007919	-	-	pre-chr2.trna9605-ValAAC	41	63	GAACATAAGAGGAACTATTTCAGCAAGAGGAGGCAGCCAGGTTTCCGTAGTGTAGTGGTTATCACGTTCGCCTAACACGCGAAAGGTCCCCGGTTCGAAACCGGGCGGAAACACGATTTTTATAACCAATAACAGACAGGAAAACACCAAACA	153	..........((..((.((((.....)))).))...)).(((((((((..(((..(((((((..(.(((((.......))))).)...((((((.....)))))).(....).........)))))))...))).)).))))...))).....	GTTTCCGTAGTGTAGTGGTTATT	Other	23	23C>T	1183	397	592	483	416	406	526	489	516	535	518	564	12102.4	5966.96	8175.55	6011.13	2531.14	2501.37	2126.85	2491.05	2314.24	3347.75	3381.95	2788.75	-3.34149	0.00787369	0.0186865	1.22604	0.091206	0.351095	-2.72543	0.0130088	0.0436453
AS-tDR-001449	-	-	pre-chr2.trna9605-ValAAC	41	72	GAACATAAGAGGAACTATTTCAGCAAGAGGAGGCAGCCAGGTTTCCGTAGTGTAGTGGTTATCACGTTCGCCTAACACGCGAAAGGTCCCCGGTTCGAAACCGGGCGGAAACACGATTTTTATAACCAATAACAGACAGGAAAACACCAAACA	153	..........((..((.((((.....)))).))...)).(((((((((..(((..(((((((..(.(((((.......))))).)...((((((.....)))))).(....).........)))))))...))).)).))))...))).....	GTTTCCGTAGTGTAGTGGTTATCACGTTCGCC	Other	32	ExactMatch	233	142	154	151	331	348	431	357	414	295	298	407	2383.66	2134.28	2126.75	1879.25	2013.96	2144.03	1742.72	1818.62	1856.78	1845.95	1945.6	2012.45	-1.10418	0.194408	0.247718	-1.00764	0.887925	1	-1.11261	0.0980373	0.154936
AS-tDR-007276	-	-	pre-chr2.trna9605-ValAAC	41	72	GAACATAAGAGGAACTATTTCAGCAAGAGGAGGCAGCCAGGTTTCCGTAGTGTAGTGGTTATCACGTTCGCCTAACACGCGAAAGGTCCCCGGTTCGAAACCGGGCGGAAACACGATTTTTATAACCAATAACAGACAGGAAAACACCAAACA	153	..........((..((.((((.....)))).))...)).(((((((((..(((..(((((((..(.(((((.......))))).)...((((((.....)))))).(....).........)))))))...))).)).))))...))).....	GTTTCCGTAGTGTAGTGGTTATCACGTTCGCT	Other	32	32C>T	260	179	184	206	408	402	510	415	567	338	343	485	2659.87	2690.39	2541.05	2563.75	2482.46	2476.73	2062.16	2114.08	2542.98	2115.02	2239.4	2398.13	-1.14439	0.0324862	0.0528009	1.01752	0.794364	1	-1.12469	0.0274018	0.0649438
AS-tDR-005435	-	-	pre-chr2.trna9605-ValAAC	42	63	GAACATAAGAGGAACTATTTCAGCAAGAGGAGGCAGCCAGGTTTCCGTAGTGTAGTGGTTATCACGTTCGCCTAACACGCGAAAGGTCCCCGGTTCGAAACCGGGCGGAAACACGATTTTTATAACCAATAACAGACAGGAAAACACCAAACA	153	..........((..((.((((.....)))).))...)).(((((((((..(((..(((((((..(.(((((.......))))).)...((((((.....)))))).(....).........)))))))...))).)).))))...))).....	TTTCCGTAGTGTAGTGGTTATC	Other	22	ExactMatch	352	280	275	317	202	228	300	224	276	363	414	469	3601.06	4208.44	3797.77	3945.19	1229.06	1404.71	1213.03	1141.09	1237.85	2271.46	2702.95	2319.02	-3.11634	1.41141e-06	0.000125891	1.70983	0.03195	0.245845	-1.82261	0.00204843	0.015804
AS-tDR-010786	-	-	pre-chr2.trna9605-ValAAC	42	63	GAACATAAGAGGAACTATTTCAGCAAGAGGAGGCAGCCAGGTTTCCGTAGTGTAGTGGTTATCACGTTCGCCTAACACGCGAAAGGTCCCCGGTTCGAAACCGGGCGGAAACACGATTTTTATAACCAATAACAGACAGGAAAACACCAAACA	153	..........((..((.((((.....)))).))...)).(((((((((..(((..(((((((..(.(((((.......))))).)...((((((.....)))))).(....).........)))))))...))).)).))))...))).....	TTTCCGTAGTGTAGTGGTTATT	Other	22	22C>T	245	169	181	210	204	171	206	182	209	260	257	274	2506.42	2540.09	2499.62	2613.53	1241.23	1053.53	832.949	927.138	937.358	1626.94	1677.92	1354.82	-2.50407	3.07076e-06	0.000172766	1.37996	0.0902417	0.351095	-1.8146	0.000558268	0.00544423
AS-tDR-007910	-	-	pre-chr3.trna11056-ValAAC	41	63	GGAATAACACTCGAAATGTATATAAGAAATACTCGCGTGGGTTTCCGTAGTGTAGTGGTTATCACGTTCGCCTAACACGCGAAAGGTCCCCGGTTCGAAACCGGGCGGAAACAGCGCTTAAATTTTGGGGCTGGGGATTTAGCTCAGTGGTAG	153	((((...(((.(((...((((.......))))))).)))...)))).............((((((..((((.......)))).(((((((((((((.(((..(((((.......)))))....))).)))))))))))))......)))))).	GTTTCCGTAGTGTAGTGGTTATA	Other	23	23C>A	350	128	171	150	93	128	161	135	142	151	159	174	3580.6	1923.86	2361.52	1866.81	565.855	788.61	650.994	687.712	636.866	944.878	1038.09	860.36	-3.61	0.00461169	0.0130917	1.2918	0.0899023	0.351095	-2.79456	0.00857553	0.0330812
AS-tDR-000052	-	-	pre-chr3.trna11056-ValAAC	41	63	GGAATAACACTCGAAATGTATATAAGAAATACTCGCGTGGGTTTCCGTAGTGTAGTGGTTATCACGTTCGCCTAACACGCGAAAGGTCCCCGGTTCGAAACCGGGCGGAAACAGCGCTTAAATTTTGGGGCTGGGGATTTAGCTCAGTGGTAG	153	((((...(((.(((...((((.......))))))).)))...)))).............((((((..((((.......)))).(((((((((((((.(((..(((((.......)))))....))).)))))))))))))......)))))).	GTTTCCGTAGTGTAGTGGTTATC	Other	23	ExactMatch	1719	577	783	672	543	569	733	591	700	802	728	973	17585.9	8672.39	10813.3	8363.31	3303.86	3505.62	2963.84	3010.65	3139.48	5018.49	4753.01	4811.09	-3.55325	0.00899961	0.0198741	1.38615	0.0342665	0.245845	-2.56339	0.0194579	0.0530631
AS-tDR-007919	-	-	pre-chr3.trna11056-ValAAC	41	63	GGAATAACACTCGAAATGTATATAAGAAATACTCGCGTGGGTTTCCGTAGTGTAGTGGTTATCACGTTCGCCTAACACGCGAAAGGTCCCCGGTTCGAAACCGGGCGGAAACAGCGCTTAAATTTTGGGGCTGGGGATTTAGCTCAGTGGTAG	153	((((...(((.(((...((((.......))))))).)))...)))).............((((((..((((.......)))).(((((((((((((.(((..(((((.......)))))....))).)))))))))))))......)))))).	GTTTCCGTAGTGTAGTGGTTATT	Other	23	23C>T	1183	397	592	483	416	406	526	489	516	535	518	564	12102.4	5966.96	8175.55	6011.13	2531.14	2501.37	2126.85	2491.05	2314.24	3347.75	3381.95	2788.75	-3.34149	0.00787369	0.0186865	1.22604	0.091206	0.351095	-2.72543	0.0130088	0.0436453
AS-tDR-001449	-	-	pre-chr3.trna11056-ValAAC	41	72	GGAATAACACTCGAAATGTATATAAGAAATACTCGCGTGGGTTTCCGTAGTGTAGTGGTTATCACGTTCGCCTAACACGCGAAAGGTCCCCGGTTCGAAACCGGGCGGAAACAGCGCTTAAATTTTGGGGCTGGGGATTTAGCTCAGTGGTAG	153	((((...(((.(((...((((.......))))))).)))...)))).............((((((..((((.......)))).(((((((((((((.(((..(((((.......)))))....))).)))))))))))))......)))))).	GTTTCCGTAGTGTAGTGGTTATCACGTTCGCC	Other	32	ExactMatch	233	142	154	151	331	348	431	357	414	295	298	407	2383.66	2134.28	2126.75	1879.25	2013.96	2144.03	1742.72	1818.62	1856.78	1845.95	1945.6	2012.45	-1.10418	0.194408	0.247718	-1.00764	0.887925	1	-1.11261	0.0980373	0.154936
AS-tDR-007276	-	-	pre-chr3.trna11056-ValAAC	41	72	GGAATAACACTCGAAATGTATATAAGAAATACTCGCGTGGGTTTCCGTAGTGTAGTGGTTATCACGTTCGCCTAACACGCGAAAGGTCCCCGGTTCGAAACCGGGCGGAAACAGCGCTTAAATTTTGGGGCTGGGGATTTAGCTCAGTGGTAG	153	((((...(((.(((...((((.......))))))).)))...)))).............((((((..((((.......)))).(((((((((((((.(((..(((((.......)))))....))).)))))))))))))......)))))).	GTTTCCGTAGTGTAGTGGTTATCACGTTCGCT	Other	32	32C>T	260	179	184	206	408	402	510	415	567	338	343	485	2659.87	2690.39	2541.05	2563.75	2482.46	2476.73	2062.16	2114.08	2542.98	2115.02	2239.4	2398.13	-1.14439	0.0324862	0.0528009	1.01752	0.794364	1	-1.12469	0.0274018	0.0649438
AS-tDR-005435	-	-	pre-chr3.trna11056-ValAAC	42	63	GGAATAACACTCGAAATGTATATAAGAAATACTCGCGTGGGTTTCCGTAGTGTAGTGGTTATCACGTTCGCCTAACACGCGAAAGGTCCCCGGTTCGAAACCGGGCGGAAACAGCGCTTAAATTTTGGGGCTGGGGATTTAGCTCAGTGGTAG	153	((((...(((.(((...((((.......))))))).)))...)))).............((((((..((((.......)))).(((((((((((((.(((..(((((.......)))))....))).)))))))))))))......)))))).	TTTCCGTAGTGTAGTGGTTATC	Other	22	ExactMatch	352	280	275	317	202	228	300	224	276	363	414	469	3601.06	4208.44	3797.77	3945.19	1229.06	1404.71	1213.03	1141.09	1237.85	2271.46	2702.95	2319.02	-3.11634	1.41141e-06	0.000125891	1.70983	0.03195	0.245845	-1.82261	0.00204843	0.015804
AS-tDR-010786	-	-	pre-chr3.trna11056-ValAAC	42	63	GGAATAACACTCGAAATGTATATAAGAAATACTCGCGTGGGTTTCCGTAGTGTAGTGGTTATCACGTTCGCCTAACACGCGAAAGGTCCCCGGTTCGAAACCGGGCGGAAACAGCGCTTAAATTTTGGGGCTGGGGATTTAGCTCAGTGGTAG	153	((((...(((.(((...((((.......))))))).)))...)))).............((((((..((((.......)))).(((((((((((((.(((..(((((.......)))))....))).)))))))))))))......)))))).	TTTCCGTAGTGTAGTGGTTATT	Other	22	22C>T	245	169	181	210	204	171	206	182	209	260	257	274	2506.42	2540.09	2499.62	2613.53	1241.23	1053.53	832.949	927.138	937.358	1626.94	1677.92	1354.82	-2.50407	3.07076e-06	0.000172766	1.37996	0.0902417	0.351095	-1.8146	0.000558268	0.00544423
AS-tDR-007910	-	-	pre-chr10.trna1315-ValAAC	41	63	CTAAGAATAATAGAGATGCAGAGTAGCCGCACAGACATGAGTTTCCGTAGTGTAGTGGTTATCACGTTCGCCTAACACGCGAAAGGTCCCCGGTTCGAAACCGGGCGGAAACAGAGGTTGCATGTTTTTTCTTCACTTTCAAAAAACTGGGAA	153	....(((....(((((.(((..((((((...((....)).(((((((..((((...(((.(......).)))..)))).(....)...((((((.....)))))))))))))...)))))).)))..))))).....))).............	GTTTCCGTAGTGTAGTGGTTATA	Other	23	23C>A	350	128	171	150	93	128	161	135	142	151	159	174	3580.6	1923.86	2361.52	1866.81	565.855	788.61	650.994	687.712	636.866	944.878	1038.09	860.36	-3.61	0.00461169	0.0130917	1.2918	0.0899023	0.351095	-2.79456	0.00857553	0.0330812
AS-tDR-000052	-	-	pre-chr10.trna1315-ValAAC	41	63	CTAAGAATAATAGAGATGCAGAGTAGCCGCACAGACATGAGTTTCCGTAGTGTAGTGGTTATCACGTTCGCCTAACACGCGAAAGGTCCCCGGTTCGAAACCGGGCGGAAACAGAGGTTGCATGTTTTTTCTTCACTTTCAAAAAACTGGGAA	153	....(((....(((((.(((..((((((...((....)).(((((((..((((...(((.(......).)))..)))).(....)...((((((.....)))))))))))))...)))))).)))..))))).....))).............	GTTTCCGTAGTGTAGTGGTTATC	Other	23	ExactMatch	1719	577	783	672	543	569	733	591	700	802	728	973	17585.9	8672.39	10813.3	8363.31	3303.86	3505.62	2963.84	3010.65	3139.48	5018.49	4753.01	4811.09	-3.55325	0.00899961	0.0198741	1.38615	0.0342665	0.245845	-2.56339	0.0194579	0.0530631
AS-tDR-007919	-	-	pre-chr10.trna1315-ValAAC	41	63	CTAAGAATAATAGAGATGCAGAGTAGCCGCACAGACATGAGTTTCCGTAGTGTAGTGGTTATCACGTTCGCCTAACACGCGAAAGGTCCCCGGTTCGAAACCGGGCGGAAACAGAGGTTGCATGTTTTTTCTTCACTTTCAAAAAACTGGGAA	153	....(((....(((((.(((..((((((...((....)).(((((((..((((...(((.(......).)))..)))).(....)...((((((.....)))))))))))))...)))))).)))..))))).....))).............	GTTTCCGTAGTGTAGTGGTTATT	Other	23	23C>T	1183	397	592	483	416	406	526	489	516	535	518	564	12102.4	5966.96	8175.55	6011.13	2531.14	2501.37	2126.85	2491.05	2314.24	3347.75	3381.95	2788.75	-3.34149	0.00787369	0.0186865	1.22604	0.091206	0.351095	-2.72543	0.0130088	0.0436453
AS-tDR-001449	-	-	pre-chr10.trna1315-ValAAC	41	72	CTAAGAATAATAGAGATGCAGAGTAGCCGCACAGACATGAGTTTCCGTAGTGTAGTGGTTATCACGTTCGCCTAACACGCGAAAGGTCCCCGGTTCGAAACCGGGCGGAAACAGAGGTTGCATGTTTTTTCTTCACTTTCAAAAAACTGGGAA	153	....(((....(((((.(((..((((((...((....)).(((((((..((((...(((.(......).)))..)))).(....)...((((((.....)))))))))))))...)))))).)))..))))).....))).............	GTTTCCGTAGTGTAGTGGTTATCACGTTCGCC	Other	32	ExactMatch	233	142	154	151	331	348	431	357	414	295	298	407	2383.66	2134.28	2126.75	1879.25	2013.96	2144.03	1742.72	1818.62	1856.78	1845.95	1945.6	2012.45	-1.10418	0.194408	0.247718	-1.00764	0.887925	1	-1.11261	0.0980373	0.154936
AS-tDR-007276	-	-	pre-chr10.trna1315-ValAAC	41	72	CTAAGAATAATAGAGATGCAGAGTAGCCGCACAGACATGAGTTTCCGTAGTGTAGTGGTTATCACGTTCGCCTAACACGCGAAAGGTCCCCGGTTCGAAACCGGGCGGAAACAGAGGTTGCATGTTTTTTCTTCACTTTCAAAAAACTGGGAA	153	....(((....(((((.(((..((((((...((....)).(((((((..((((...(((.(......).)))..)))).(....)...((((((.....)))))))))))))...)))))).)))..))))).....))).............	GTTTCCGTAGTGTAGTGGTTATCACGTTCGCT	Other	32	32C>T	260	179	184	206	408	402	510	415	567	338	343	485	2659.87	2690.39	2541.05	2563.75	2482.46	2476.73	2062.16	2114.08	2542.98	2115.02	2239.4	2398.13	-1.14439	0.0324862	0.0528009	1.01752	0.794364	1	-1.12469	0.0274018	0.0649438
AS-tDR-005435	-	-	pre-chr10.trna1315-ValAAC	42	63	CTAAGAATAATAGAGATGCAGAGTAGCCGCACAGACATGAGTTTCCGTAGTGTAGTGGTTATCACGTTCGCCTAACACGCGAAAGGTCCCCGGTTCGAAACCGGGCGGAAACAGAGGTTGCATGTTTTTTCTTCACTTTCAAAAAACTGGGAA	153	....(((....(((((.(((..((((((...((....)).(((((((..((((...(((.(......).)))..)))).(....)...((((((.....)))))))))))))...)))))).)))..))))).....))).............	TTTCCGTAGTGTAGTGGTTATC	Other	22	ExactMatch	352	280	275	317	202	228	300	224	276	363	414	469	3601.06	4208.44	3797.77	3945.19	1229.06	1404.71	1213.03	1141.09	1237.85	2271.46	2702.95	2319.02	-3.11634	1.41141e-06	0.000125891	1.70983	0.03195	0.245845	-1.82261	0.00204843	0.015804
AS-tDR-010786	-	-	pre-chr10.trna1315-ValAAC	42	63	CTAAGAATAATAGAGATGCAGAGTAGCCGCACAGACATGAGTTTCCGTAGTGTAGTGGTTATCACGTTCGCCTAACACGCGAAAGGTCCCCGGTTCGAAACCGGGCGGAAACAGAGGTTGCATGTTTTTTCTTCACTTTCAAAAAACTGGGAA	153	....(((....(((((.(((..((((((...((....)).(((((((..((((...(((.(......).)))..)))).(....)...((((((.....)))))))))))))...)))))).)))..))))).....))).............	TTTCCGTAGTGTAGTGGTTATT	Other	22	22C>T	245	169	181	210	204	171	206	182	209	260	257	274	2506.42	2540.09	2499.62	2613.53	1241.23	1053.53	832.949	927.138	937.358	1626.94	1677.92	1354.82	-2.50407	3.07076e-06	0.000172766	1.37996	0.0902417	0.351095	-1.8146	0.000558268	0.00544423
AS-tDR-007910	-	-	pre-chr10.trna1309-ValAAC	41	63	ATACCATACCACTTAATGAACAAGAACCTCACAAGCGTGGGTTTCCGTAGTGTAGTGGTTATCACGTTCGCCTAACACGCGAAAGGTCCCCGGTTCGAAACCGGGCGGAAACAGCGCTTAAATTTTCTTCTCCCCTTTCGGTTAATGAACGGA	153	..(((((..((((......((..(((((.(((....))))))))..))))))..))))).....((((((..((((...(((((((..((((((.....)))))).(....).....................))))))))))).))))))..	GTTTCCGTAGTGTAGTGGTTATA	Other	23	23C>A	350	128	171	150	93	128	161	135	142	151	159	174	3580.6	1923.86	2361.52	1866.81	565.855	788.61	650.994	687.712	636.866	944.878	1038.09	860.36	-3.61	0.00461169	0.0130917	1.2918	0.0899023	0.351095	-2.79456	0.00857553	0.0330812
AS-tDR-000052	-	-	pre-chr10.trna1309-ValAAC	41	63	ATACCATACCACTTAATGAACAAGAACCTCACAAGCGTGGGTTTCCGTAGTGTAGTGGTTATCACGTTCGCCTAACACGCGAAAGGTCCCCGGTTCGAAACCGGGCGGAAACAGCGCTTAAATTTTCTTCTCCCCTTTCGGTTAATGAACGGA	153	..(((((..((((......((..(((((.(((....))))))))..))))))..))))).....((((((..((((...(((((((..((((((.....)))))).(....).....................))))))))))).))))))..	GTTTCCGTAGTGTAGTGGTTATC	Other	23	ExactMatch	1719	577	783	672	543	569	733	591	700	802	728	973	17585.9	8672.39	10813.3	8363.31	3303.86	3505.62	2963.84	3010.65	3139.48	5018.49	4753.01	4811.09	-3.55325	0.00899961	0.0198741	1.38615	0.0342665	0.245845	-2.56339	0.0194579	0.0530631
AS-tDR-007919	-	-	pre-chr10.trna1309-ValAAC	41	63	ATACCATACCACTTAATGAACAAGAACCTCACAAGCGTGGGTTTCCGTAGTGTAGTGGTTATCACGTTCGCCTAACACGCGAAAGGTCCCCGGTTCGAAACCGGGCGGAAACAGCGCTTAAATTTTCTTCTCCCCTTTCGGTTAATGAACGGA	153	..(((((..((((......((..(((((.(((....))))))))..))))))..))))).....((((((..((((...(((((((..((((((.....)))))).(....).....................))))))))))).))))))..	GTTTCCGTAGTGTAGTGGTTATT	Other	23	23C>T	1183	397	592	483	416	406	526	489	516	535	518	564	12102.4	5966.96	8175.55	6011.13	2531.14	2501.37	2126.85	2491.05	2314.24	3347.75	3381.95	2788.75	-3.34149	0.00787369	0.0186865	1.22604	0.091206	0.351095	-2.72543	0.0130088	0.0436453
AS-tDR-001449	-	-	pre-chr10.trna1309-ValAAC	41	72	ATACCATACCACTTAATGAACAAGAACCTCACAAGCGTGGGTTTCCGTAGTGTAGTGGTTATCACGTTCGCCTAACACGCGAAAGGTCCCCGGTTCGAAACCGGGCGGAAACAGCGCTTAAATTTTCTTCTCCCCTTTCGGTTAATGAACGGA	153	..(((((..((((......((..(((((.(((....))))))))..))))))..))))).....((((((..((((...(((((((..((((((.....)))))).(....).....................))))))))))).))))))..	GTTTCCGTAGTGTAGTGGTTATCACGTTCGCC	Other	32	ExactMatch	233	142	154	151	331	348	431	357	414	295	298	407	2383.66	2134.28	2126.75	1879.25	2013.96	2144.03	1742.72	1818.62	1856.78	1845.95	1945.6	2012.45	-1.10418	0.194408	0.247718	-1.00764	0.887925	1	-1.11261	0.0980373	0.154936
AS-tDR-007276	-	-	pre-chr10.trna1309-ValAAC	41	72	ATACCATACCACTTAATGAACAAGAACCTCACAAGCGTGGGTTTCCGTAGTGTAGTGGTTATCACGTTCGCCTAACACGCGAAAGGTCCCCGGTTCGAAACCGGGCGGAAACAGCGCTTAAATTTTCTTCTCCCCTTTCGGTTAATGAACGGA	153	..(((((..((((......((..(((((.(((....))))))))..))))))..))))).....((((((..((((...(((((((..((((((.....)))))).(....).....................))))))))))).))))))..	GTTTCCGTAGTGTAGTGGTTATCACGTTCGCT	Other	32	32C>T	260	179	184	206	408	402	510	415	567	338	343	485	2659.87	2690.39	2541.05	2563.75	2482.46	2476.73	2062.16	2114.08	2542.98	2115.02	2239.4	2398.13	-1.14439	0.0324862	0.0528009	1.01752	0.794364	1	-1.12469	0.0274018	0.0649438
AS-tDR-005435	-	-	pre-chr10.trna1309-ValAAC	42	63	ATACCATACCACTTAATGAACAAGAACCTCACAAGCGTGGGTTTCCGTAGTGTAGTGGTTATCACGTTCGCCTAACACGCGAAAGGTCCCCGGTTCGAAACCGGGCGGAAACAGCGCTTAAATTTTCTTCTCCCCTTTCGGTTAATGAACGGA	153	..(((((..((((......((..(((((.(((....))))))))..))))))..))))).....((((((..((((...(((((((..((((((.....)))))).(....).....................))))))))))).))))))..	TTTCCGTAGTGTAGTGGTTATC	Other	22	ExactMatch	352	280	275	317	202	228	300	224	276	363	414	469	3601.06	4208.44	3797.77	3945.19	1229.06	1404.71	1213.03	1141.09	1237.85	2271.46	2702.95	2319.02	-3.11634	1.41141e-06	0.000125891	1.70983	0.03195	0.245845	-1.82261	0.00204843	0.015804
AS-tDR-010786	-	-	pre-chr10.trna1309-ValAAC	42	63	ATACCATACCACTTAATGAACAAGAACCTCACAAGCGTGGGTTTCCGTAGTGTAGTGGTTATCACGTTCGCCTAACACGCGAAAGGTCCCCGGTTCGAAACCGGGCGGAAACAGCGCTTAAATTTTCTTCTCCCCTTTCGGTTAATGAACGGA	153	..(((((..((((......((..(((((.(((....))))))))..))))))..))))).....((((((..((((...(((((((..((((((.....)))))).(....).....................))))))))))).))))))..	TTTCCGTAGTGTAGTGGTTATT	Other	22	22C>T	245	169	181	210	204	171	206	182	209	260	257	274	2506.42	2540.09	2499.62	2613.53	1241.23	1053.53	832.949	927.138	937.358	1626.94	1677.92	1354.82	-2.50407	3.07076e-06	0.000172766	1.37996	0.0902417	0.351095	-1.8146	0.000558268	0.00544423
AS-tDR-001324	-	-	pre-chr3.trna3497-HisGTG	40	73	CACACTGGCTACACACTGCACTGTGGCGTTCCGGTAGCTCGCCGTGATCGTATAGTGGTTAGTACTCTGCGTTGTGGCCGCAGCAACCTCGGTTCGAATCCGAGTCACGGCATTGTGGCAACAATGGCACGGCAAGGGCGCCTTTTTAGTAG	152	...((((((((((........)))))).....(((.((((((((((...((((........))))....((((((.((((((((...(((((.......))))).....))..)))))).)))))).))))))..)))))))....))))..	GGCCGTGATCGTATAGTGGTTAGTACTCTGCGTT	Other	34	1C>G	92	94	64	116	77	78	93	99	153	95	160	145	941.186	1412.83	883.844	1443.67	468.504	480.559	376.04	504.322	686.2	594.46	1044.62	716.966	-2.55561	0.00336736	0.0126692	1.6615	0.0250046	0.245845	-1.53813	0.0618136	0.109522
AS-tDR-007267	-	-	pre-chr3.trna3497-HisGTG	41	71	CACACTGGCTACACACTGCACTGTGGCGTTCCGGTAGCTCGCCGTGATCGTATAGTGGTTAGTACTCTGCGTTGTGGCCGCAGCAACCTCGGTTCGAATCCGAGTCACGGCATTGTGGCAACAATGGCACGGCAAGGGCGCCTTTTTAGTAG	152	...((((((((((........)))))).....(((.((((((((((...((((........))))....((((((.((((((((...(((((.......))))).....))..)))))).)))))).))))))..)))))))....))))..	GCCGTGATCGTATAGTGGTTAGTACTCTGCA	Other	31	31G>A	52	24	29	32	173	123	206	143	214	149	244	261	531.975	360.723	400.492	398.253	1052.61	757.804	832.949	728.466	959.783	932.363	1593.04	1290.54	1.99112	0.00221224	0.00959686	1.41587	0.0878207	0.351095	2.81916	0.00297884	0.0195083
AS-tDR-000744	-	-	pre-chr3.trna3497-HisGTG	41	71	CACACTGGCTACACACTGCACTGTGGCGTTCCGGTAGCTCGCCGTGATCGTATAGTGGTTAGTACTCTGCGTTGTGGCCGCAGCAACCTCGGTTCGAATCCGAGTCACGGCATTGTGGCAACAATGGCACGGCAAGGGCGCCTTTTTAGTAG	152	...((((((((((........)))))).....(((.((((((((((...((((........))))....((((((.((((((((...(((((.......))))).....))..)))))).)))))).))))))..)))))))....))))..	GCCGTGATCGTATAGTGGTTAGTACTCTGCG	Other	31	ExactMatch	138	80	83	103	617	477	658	400	869	563	841	1015	1411.78	1202.41	1146.23	1281.88	3754.11	2938.8	2660.59	2037.67	3897.44	3522.96	5490.77	5018.76	2.25812	0.00456353	0.0130917	1.57382	0.031138	0.245845	3.55388	0.000453365	0.0051014
AS-tDR-001319	-	-	pre-chr3.trna3497-HisGTG	41	72	CACACTGGCTACACACTGCACTGTGGCGTTCCGGTAGCTCGCCGTGATCGTATAGTGGTTAGTACTCTGCGTTGTGGCCGCAGCAACCTCGGTTCGAATCCGAGTCACGGCATTGTGGCAACAATGGCACGGCAAGGGCGCCTTTTTAGTAG	152	...((((((((((........)))))).....(((.((((((((((...((((........))))....((((((.((((((((...(((((.......))))).....))..)))))).)))))).))))))..)))))))....))))..	GCCGTGATCGTATAGTGGTTAGTACTCTGCGT	Other	32	ExactMatch	36	16	22	24	171	132	194	148	142	135	217	205	368.29	240.482	303.821	298.689	1040.44	813.254	784.428	753.937	636.866	844.758	1416.76	1013.64	2.79446	0.000241837	0.00255093	1.15311	0.492091	0.771688	3.22232	0.00684595	0.0282071
AS-tDR-001320	-	-	pre-chr3.trna3497-HisGTG	41	73	CACACTGGCTACACACTGCACTGTGGCGTTCCGGTAGCTCGCCGTGATCGTATAGTGGTTAGTACTCTGCGTTGTGGCCGCAGCAACCTCGGTTCGAATCCGAGTCACGGCATTGTGGCAACAATGGCACGGCAAGGGCGCCTTTTTAGTAG	152	...((((((((((........)))))).....(((.((((((((((...((((........))))....((((((.((((((((...(((((.......))))).....))..)))))).)))))).))))))..)))))))....))))..	GCCGTGATCGTATAGTGGTTAGTACTCTGCGTT	Other	33	ExactMatch	168	81	80	193	678	512	785	668	686	565	780	1029	1718.69	1217.44	1104.8	2401.96	4125.27	3154.44	3174.1	3402.9	3076.69	3535.47	5092.51	5087.99	2.14998	0.00252801	0.0102226	1.21182	0.245854	0.554651	2.60539	0.00507049	0.0262757
AS-tDR-001321	-	-	pre-chr3.trna3497-HisGTG	41	74	CACACTGGCTACACACTGCACTGTGGCGTTCCGGTAGCTCGCCGTGATCGTATAGTGGTTAGTACTCTGCGTTGTGGCCGCAGCAACCTCGGTTCGAATCCGAGTCACGGCATTGTGGCAACAATGGCACGGCAAGGGCGCCTTTTTAGTAG	152	...((((((((((........)))))).....(((.((((((((((...((((........))))....((((((.((((((((...(((((.......))))).....))..)))))).)))))).))))))..)))))))....))))..	GCCGTGATCGTATAGTGGTTAGTACTCTGCGTTG	Other	34	ExactMatch	51	33	50	51	269	185	337	260	312	260	308	311	521.744	495.994	690.503	634.715	1636.72	1139.79	1362.64	1324.48	1399.31	1626.94	2010.89	1537.77	2.32967	0.000444282	0.0036511	1.20325	0.146033	0.410438	2.80317	0.000267067	0.00355151
AS-tDR-003565	-	-	pre-chr3.trna3497-HisGTG	42	68	CACACTGGCTACACACTGCACTGTGGCGTTCCGGTAGCTCGCCGTGATCGTATAGTGGTTAGTACTCTGCGTTGTGGCCGCAGCAACCTCGGTTCGAATCCGAGTCACGGCATTGTGGCAACAATGGCACGGCAAGGGCGCCTTTTTAGTAG	152	...((((((((((........)))))).....(((.((((((((((...((((........))))....((((((.((((((((...(((((.......))))).....))..)))))).)))))).))))))..)))))))....))))..	CCGTGATCGTATAGTGGTTAGTACTCT	Other	27	ExactMatch	154	10	29	15	0	25	67	0	0	0	0	0	1575.46	150.301	400.492	186.681	0	154.025	270.911	0	0	0	0	0	-5.40159	0.218329	0.275036	-107.234	0.157607	0.419991	-579.234	0.136973	0.194263
AS-tDR-003567	-	-	pre-chr3.trna3497-HisGTG	42	70	CACACTGGCTACACACTGCACTGTGGCGTTCCGGTAGCTCGCCGTGATCGTATAGTGGTTAGTACTCTGCGTTGTGGCCGCAGCAACCTCGGTTCGAATCCGAGTCACGGCATTGTGGCAACAATGGCACGGCAAGGGCGCCTTTTTAGTAG	152	...((((((((((........)))))).....(((.((((((((((...((((........))))....((((((.((((((((...(((((.......))))).....))..)))))).)))))).))))))..)))))))....))))..	CCGTGATCGTATAGTGGTTAGTACTCTGC	Other	29	ExactMatch	71	51	30	43	25	37	87	0	50	36	41	59	726.35	766.537	414.302	535.152	152.112	227.957	351.78	0	224.248	225.269	267.683	291.731	-3.32452	0.00831349	0.0194141	1.37655	0.393803	0.668898	-2.41511	0.00537043	0.0262757
AS-tDR-003568	-	-	pre-chr3.trna3497-HisGTG	42	71	CACACTGGCTACACACTGCACTGTGGCGTTCCGGTAGCTCGCCGTGATCGTATAGTGGTTAGTACTCTGCGTTGTGGCCGCAGCAACCTCGGTTCGAATCCGAGTCACGGCATTGTGGCAACAATGGCACGGCAAGGGCGCCTTTTTAGTAG	152	...((((((((((........)))))).....(((.((((((((((...((((........))))....((((((.((((((((...(((((.......))))).....))..)))))).)))))).))))))..)))))))....))))..	CCGTGATCGTATAGTGGTTAGTACTCTGCG	Other	30	ExactMatch	227	156	148	132	102	141	378	138	218	166	263	304	2322.27	2344.7	2043.89	1642.79	620.615	868.703	1528.42	702.995	977.723	1038.74	1717.09	1503.16	-2.24383	0.00454939	0.0130917	1.407	0.214808	0.5101	-1.59476	0.0184095	0.0516162
AS-tDR-003573	-	-	pre-chr3.trna3497-HisGTG	42	76	CACACTGGCTACACACTGCACTGTGGCGTTCCGGTAGCTCGCCGTGATCGTATAGTGGTTAGTACTCTGCGTTGTGGCCGCAGCAACCTCGGTTCGAATCCGAGTCACGGCATTGTGGCAACAATGGCACGGCAAGGGCGCCTTTTTAGTAG	152	...((((((((((........)))))).....(((.((((((((((...((((........))))....((((((.((((((((...(((((.......))))).....))..)))))).)))))).))))))..)))))))....))))..	CCGTGATCGTATAGTGGTTAGTACTCTGCGTTGTG	Other	35	ExactMatch	35	41	37	93	0	62	493	0	65	26	20	0	358.06	616.236	510.972	1157.42	0	381.983	1993.42	0	291.523	162.694	130.577	0	-1.11233	0.899242	0.914496	-4.04114	0.385982	0.66394	-4.4951	0.0312493	0.0711573
AS-tDR-003593	-	-	pre-chr3.trna3497-HisGTG	43	68	CACACTGGCTACACACTGCACTGTGGCGTTCCGGTAGCTCGCCGTGATCGTATAGTGGTTAGTACTCTGCGTTGTGGCCGCAGCAACCTCGGTTCGAATCCGAGTCACGGCATTGTGGCAACAATGGCACGGCAAGGGCGCCTTTTTAGTAG	152	...((((((((((........)))))).....(((.((((((((((...((((........))))....((((((.((((((((...(((((.......))))).....))..)))))).)))))).))))))..)))))))....))))..	CGTGATCGTATAGTGGTTAGTACTCT	Other	26	ExactMatch	634	26	84	38	32	32	53	28	0	0	0	0	6486	390.784	1160.04	472.925	194.703	197.152	214.302	142.637	0	0	0	0	-11.3095	0.233057	0.291381	-188.199	1.94243e-05	0.00322885	-2128.44	0.196146	0.253465
AS-tDR-003596	-	-	pre-chr3.trna3497-HisGTG	43	71	CACACTGGCTACACACTGCACTGTGGCGTTCCGGTAGCTCGCCGTGATCGTATAGTGGTTAGTACTCTGCGTTGTGGCCGCAGCAACCTCGGTTCGAATCCGAGTCACGGCATTGTGGCAACAATGGCACGGCAAGGGCGCCTTTTTAGTAG	152	...((((((((((........)))))).....(((.((((((((((...((((........))))....((((((.((((((((...(((((.......))))).....))..)))))).)))))).))))))..)))))))....))))..	CGTGATCGTATAGTGGTTAGTACTCTGCG	Other	29	ExactMatch	326	31	70	51	85	74	222	80	97	66	119	142	3335.07	465.934	966.704	634.715	517.179	455.915	897.644	407.533	435.042	412.993	776.935	702.133	-2.36888	0.293711	0.362872	1.0214	0.935624	1	-2.31926	0.298754	0.367736
AS-tDR-001324	-	-	pre-chr3.trna8790-HisGTG	40	73	GATCAAGTAAGAAGTCCTGACCTTAGGTTCCCGGTAGCTCGCCGTGATCGTATAGTGGTTAGTACTCTGCGTTGTGGCCGCAGCAACCTCGGTTCGAATCCGAGTCACGGCATTGTGGCAACAATGGCACGGCAAGGGACCTGTTTTGTTCC	152	((.((((..((..(((((.(((..........))).....((((((...((((........))))....((((((.((((((((...(((((.......))))).....))..)))))).)))))).))))))..)))))))..)))).)).	GGCCGTGATCGTATAGTGGTTAGTACTCTGCGTT	Other	34	1C>G	92	94	64	116	77	78	93	99	153	95	160	145	941.186	1412.83	883.844	1443.67	468.504	480.559	376.04	504.322	686.2	594.46	1044.62	716.966	-2.55561	0.00336736	0.0126692	1.6615	0.0250046	0.245845	-1.53813	0.0618136	0.109522
AS-tDR-007267	-	-	pre-chr3.trna8790-HisGTG	41	71	GATCAAGTAAGAAGTCCTGACCTTAGGTTCCCGGTAGCTCGCCGTGATCGTATAGTGGTTAGTACTCTGCGTTGTGGCCGCAGCAACCTCGGTTCGAATCCGAGTCACGGCATTGTGGCAACAATGGCACGGCAAGGGACCTGTTTTGTTCC	152	((.((((..((..(((((.(((..........))).....((((((...((((........))))....((((((.((((((((...(((((.......))))).....))..)))))).)))))).))))))..)))))))..)))).)).	GCCGTGATCGTATAGTGGTTAGTACTCTGCA	Other	31	31G>A	52	24	29	32	173	123	206	143	214	149	244	261	531.975	360.723	400.492	398.253	1052.61	757.804	832.949	728.466	959.783	932.363	1593.04	1290.54	1.99112	0.00221224	0.00959686	1.41587	0.0878207	0.351095	2.81916	0.00297884	0.0195083
AS-tDR-000744	-	-	pre-chr3.trna8790-HisGTG	41	71	GATCAAGTAAGAAGTCCTGACCTTAGGTTCCCGGTAGCTCGCCGTGATCGTATAGTGGTTAGTACTCTGCGTTGTGGCCGCAGCAACCTCGGTTCGAATCCGAGTCACGGCATTGTGGCAACAATGGCACGGCAAGGGACCTGTTTTGTTCC	152	((.((((..((..(((((.(((..........))).....((((((...((((........))))....((((((.((((((((...(((((.......))))).....))..)))))).)))))).))))))..)))))))..)))).)).	GCCGTGATCGTATAGTGGTTAGTACTCTGCG	Other	31	ExactMatch	138	80	83	103	617	477	658	400	869	563	841	1015	1411.78	1202.41	1146.23	1281.88	3754.11	2938.8	2660.59	2037.67	3897.44	3522.96	5490.77	5018.76	2.25812	0.00456353	0.0130917	1.57382	0.031138	0.245845	3.55388	0.000453365	0.0051014
AS-tDR-001319	-	-	pre-chr3.trna8790-HisGTG	41	72	GATCAAGTAAGAAGTCCTGACCTTAGGTTCCCGGTAGCTCGCCGTGATCGTATAGTGGTTAGTACTCTGCGTTGTGGCCGCAGCAACCTCGGTTCGAATCCGAGTCACGGCATTGTGGCAACAATGGCACGGCAAGGGACCTGTTTTGTTCC	152	((.((((..((..(((((.(((..........))).....((((((...((((........))))....((((((.((((((((...(((((.......))))).....))..)))))).)))))).))))))..)))))))..)))).)).	GCCGTGATCGTATAGTGGTTAGTACTCTGCGT	Other	32	ExactMatch	36	16	22	24	171	132	194	148	142	135	217	205	368.29	240.482	303.821	298.689	1040.44	813.254	784.428	753.937	636.866	844.758	1416.76	1013.64	2.79446	0.000241837	0.00255093	1.15311	0.492091	0.771688	3.22232	0.00684595	0.0282071
AS-tDR-001320	-	-	pre-chr3.trna8790-HisGTG	41	73	GATCAAGTAAGAAGTCCTGACCTTAGGTTCCCGGTAGCTCGCCGTGATCGTATAGTGGTTAGTACTCTGCGTTGTGGCCGCAGCAACCTCGGTTCGAATCCGAGTCACGGCATTGTGGCAACAATGGCACGGCAAGGGACCTGTTTTGTTCC	152	((.((((..((..(((((.(((..........))).....((((((...((((........))))....((((((.((((((((...(((((.......))))).....))..)))))).)))))).))))))..)))))))..)))).)).	GCCGTGATCGTATAGTGGTTAGTACTCTGCGTT	Other	33	ExactMatch	168	81	80	193	678	512	785	668	686	565	780	1029	1718.69	1217.44	1104.8	2401.96	4125.27	3154.44	3174.1	3402.9	3076.69	3535.47	5092.51	5087.99	2.14998	0.00252801	0.0102226	1.21182	0.245854	0.554651	2.60539	0.00507049	0.0262757
AS-tDR-001321	-	-	pre-chr3.trna8790-HisGTG	41	74	GATCAAGTAAGAAGTCCTGACCTTAGGTTCCCGGTAGCTCGCCGTGATCGTATAGTGGTTAGTACTCTGCGTTGTGGCCGCAGCAACCTCGGTTCGAATCCGAGTCACGGCATTGTGGCAACAATGGCACGGCAAGGGACCTGTTTTGTTCC	152	((.((((..((..(((((.(((..........))).....((((((...((((........))))....((((((.((((((((...(((((.......))))).....))..)))))).)))))).))))))..)))))))..)))).)).	GCCGTGATCGTATAGTGGTTAGTACTCTGCGTTG	Other	34	ExactMatch	51	33	50	51	269	185	337	260	312	260	308	311	521.744	495.994	690.503	634.715	1636.72	1139.79	1362.64	1324.48	1399.31	1626.94	2010.89	1537.77	2.32967	0.000444282	0.0036511	1.20325	0.146033	0.410438	2.80317	0.000267067	0.00355151
AS-tDR-003565	-	-	pre-chr3.trna8790-HisGTG	42	68	GATCAAGTAAGAAGTCCTGACCTTAGGTTCCCGGTAGCTCGCCGTGATCGTATAGTGGTTAGTACTCTGCGTTGTGGCCGCAGCAACCTCGGTTCGAATCCGAGTCACGGCATTGTGGCAACAATGGCACGGCAAGGGACCTGTTTTGTTCC	152	((.((((..((..(((((.(((..........))).....((((((...((((........))))....((((((.((((((((...(((((.......))))).....))..)))))).)))))).))))))..)))))))..)))).)).	CCGTGATCGTATAGTGGTTAGTACTCT	Other	27	ExactMatch	154	10	29	15	0	25	67	0	0	0	0	0	1575.46	150.301	400.492	186.681	0	154.025	270.911	0	0	0	0	0	-5.40159	0.218329	0.275036	-107.234	0.157607	0.419991	-579.234	0.136973	0.194263
AS-tDR-003567	-	-	pre-chr3.trna8790-HisGTG	42	70	GATCAAGTAAGAAGTCCTGACCTTAGGTTCCCGGTAGCTCGCCGTGATCGTATAGTGGTTAGTACTCTGCGTTGTGGCCGCAGCAACCTCGGTTCGAATCCGAGTCACGGCATTGTGGCAACAATGGCACGGCAAGGGACCTGTTTTGTTCC	152	((.((((..((..(((((.(((..........))).....((((((...((((........))))....((((((.((((((((...(((((.......))))).....))..)))))).)))))).))))))..)))))))..)))).)).	CCGTGATCGTATAGTGGTTAGTACTCTGC	Other	29	ExactMatch	71	51	30	43	25	37	87	0	50	36	41	59	726.35	766.537	414.302	535.152	152.112	227.957	351.78	0	224.248	225.269	267.683	291.731	-3.32452	0.00831349	0.0194141	1.37655	0.393803	0.668898	-2.41511	0.00537043	0.0262757
AS-tDR-003568	-	-	pre-chr3.trna8790-HisGTG	42	71	GATCAAGTAAGAAGTCCTGACCTTAGGTTCCCGGTAGCTCGCCGTGATCGTATAGTGGTTAGTACTCTGCGTTGTGGCCGCAGCAACCTCGGTTCGAATCCGAGTCACGGCATTGTGGCAACAATGGCACGGCAAGGGACCTGTTTTGTTCC	152	((.((((..((..(((((.(((..........))).....((((((...((((........))))....((((((.((((((((...(((((.......))))).....))..)))))).)))))).))))))..)))))))..)))).)).	CCGTGATCGTATAGTGGTTAGTACTCTGCG	Other	30	ExactMatch	227	156	148	132	102	141	378	138	218	166	263	304	2322.27	2344.7	2043.89	1642.79	620.615	868.703	1528.42	702.995	977.723	1038.74	1717.09	1503.16	-2.24383	0.00454939	0.0130917	1.407	0.214808	0.5101	-1.59476	0.0184095	0.0516162
AS-tDR-003573	-	-	pre-chr3.trna8790-HisGTG	42	76	GATCAAGTAAGAAGTCCTGACCTTAGGTTCCCGGTAGCTCGCCGTGATCGTATAGTGGTTAGTACTCTGCGTTGTGGCCGCAGCAACCTCGGTTCGAATCCGAGTCACGGCATTGTGGCAACAATGGCACGGCAAGGGACCTGTTTTGTTCC	152	((.((((..((..(((((.(((..........))).....((((((...((((........))))....((((((.((((((((...(((((.......))))).....))..)))))).)))))).))))))..)))))))..)))).)).	CCGTGATCGTATAGTGGTTAGTACTCTGCGTTGTG	Other	35	ExactMatch	35	41	37	93	0	62	493	0	65	26	20	0	358.06	616.236	510.972	1157.42	0	381.983	1993.42	0	291.523	162.694	130.577	0	-1.11233	0.899242	0.914496	-4.04114	0.385982	0.66394	-4.4951	0.0312493	0.0711573
AS-tDR-003593	-	-	pre-chr3.trna8790-HisGTG	43	68	GATCAAGTAAGAAGTCCTGACCTTAGGTTCCCGGTAGCTCGCCGTGATCGTATAGTGGTTAGTACTCTGCGTTGTGGCCGCAGCAACCTCGGTTCGAATCCGAGTCACGGCATTGTGGCAACAATGGCACGGCAAGGGACCTGTTTTGTTCC	152	((.((((..((..(((((.(((..........))).....((((((...((((........))))....((((((.((((((((...(((((.......))))).....))..)))))).)))))).))))))..)))))))..)))).)).	CGTGATCGTATAGTGGTTAGTACTCT	Other	26	ExactMatch	634	26	84	38	32	32	53	28	0	0	0	0	6486	390.784	1160.04	472.925	194.703	197.152	214.302	142.637	0	0	0	0	-11.3095	0.233057	0.291381	-188.199	1.94243e-05	0.00322885	-2128.44	0.196146	0.253465
AS-tDR-003596	-	-	pre-chr3.trna8790-HisGTG	43	71	GATCAAGTAAGAAGTCCTGACCTTAGGTTCCCGGTAGCTCGCCGTGATCGTATAGTGGTTAGTACTCTGCGTTGTGGCCGCAGCAACCTCGGTTCGAATCCGAGTCACGGCATTGTGGCAACAATGGCACGGCAAGGGACCTGTTTTGTTCC	152	((.((((..((..(((((.(((..........))).....((((((...((((........))))....((((((.((((((((...(((((.......))))).....))..)))))).)))))).))))))..)))))))..)))).)).	CGTGATCGTATAGTGGTTAGTACTCTGCG	Other	29	ExactMatch	326	31	70	51	85	74	222	80	97	66	119	142	3335.07	465.934	966.704	634.715	517.179	455.915	897.644	407.533	435.042	412.993	776.935	702.133	-2.36888	0.293711	0.362872	1.0214	0.935624	1	-2.31926	0.298754	0.367736
AS-tDR-001324	-	-	pre-chr3.trna8791-HisGTG	40	73	GAATATTCAGAAGAGGAATATTACAGGTCCCTGGTAGCTCGCCGTGATCGTATAGTGGTTAGTACTCTGCGTTGTGGCCGCAGCAACCTCGGTTCGAATCCGAGTCACGGCATTGTGGCAACAATGGCACGGCAAGGGGTTCCTGTGTTTTT	152	.(((((((.......)))))))(((((..(((.....((.((((((...((((........))))....((((((.((((((((...(((((.......))))).....))..)))))).)))))).)))))).)))))..)))))......	GGCCGTGATCGTATAGTGGTTAGTACTCTGCGTT	Other	34	1C>G	92	94	64	116	77	78	93	99	153	95	160	145	941.186	1412.83	883.844	1443.67	468.504	480.559	376.04	504.322	686.2	594.46	1044.62	716.966	-2.55561	0.00336736	0.0126692	1.6615	0.0250046	0.245845	-1.53813	0.0618136	0.109522
AS-tDR-007267	-	-	pre-chr3.trna8791-HisGTG	41	71	GAATATTCAGAAGAGGAATATTACAGGTCCCTGGTAGCTCGCCGTGATCGTATAGTGGTTAGTACTCTGCGTTGTGGCCGCAGCAACCTCGGTTCGAATCCGAGTCACGGCATTGTGGCAACAATGGCACGGCAAGGGGTTCCTGTGTTTTT	152	.(((((((.......)))))))(((((..(((.....((.((((((...((((........))))....((((((.((((((((...(((((.......))))).....))..)))))).)))))).)))))).)))))..)))))......	GCCGTGATCGTATAGTGGTTAGTACTCTGCA	Other	31	31G>A	52	24	29	32	173	123	206	143	214	149	244	261	531.975	360.723	400.492	398.253	1052.61	757.804	832.949	728.466	959.783	932.363	1593.04	1290.54	1.99112	0.00221224	0.00959686	1.41587	0.0878207	0.351095	2.81916	0.00297884	0.0195083
AS-tDR-000744	-	-	pre-chr3.trna8791-HisGTG	41	71	GAATATTCAGAAGAGGAATATTACAGGTCCCTGGTAGCTCGCCGTGATCGTATAGTGGTTAGTACTCTGCGTTGTGGCCGCAGCAACCTCGGTTCGAATCCGAGTCACGGCATTGTGGCAACAATGGCACGGCAAGGGGTTCCTGTGTTTTT	152	.(((((((.......)))))))(((((..(((.....((.((((((...((((........))))....((((((.((((((((...(((((.......))))).....))..)))))).)))))).)))))).)))))..)))))......	GCCGTGATCGTATAGTGGTTAGTACTCTGCG	Other	31	ExactMatch	138	80	83	103	617	477	658	400	869	563	841	1015	1411.78	1202.41	1146.23	1281.88	3754.11	2938.8	2660.59	2037.67	3897.44	3522.96	5490.77	5018.76	2.25812	0.00456353	0.0130917	1.57382	0.031138	0.245845	3.55388	0.000453365	0.0051014
AS-tDR-001319	-	-	pre-chr3.trna8791-HisGTG	41	72	GAATATTCAGAAGAGGAATATTACAGGTCCCTGGTAGCTCGCCGTGATCGTATAGTGGTTAGTACTCTGCGTTGTGGCCGCAGCAACCTCGGTTCGAATCCGAGTCACGGCATTGTGGCAACAATGGCACGGCAAGGGGTTCCTGTGTTTTT	152	.(((((((.......)))))))(((((..(((.....((.((((((...((((........))))....((((((.((((((((...(((((.......))))).....))..)))))).)))))).)))))).)))))..)))))......	GCCGTGATCGTATAGTGGTTAGTACTCTGCGT	Other	32	ExactMatch	36	16	22	24	171	132	194	148	142	135	217	205	368.29	240.482	303.821	298.689	1040.44	813.254	784.428	753.937	636.866	844.758	1416.76	1013.64	2.79446	0.000241837	0.00255093	1.15311	0.492091	0.771688	3.22232	0.00684595	0.0282071
AS-tDR-001320	-	-	pre-chr3.trna8791-HisGTG	41	73	GAATATTCAGAAGAGGAATATTACAGGTCCCTGGTAGCTCGCCGTGATCGTATAGTGGTTAGTACTCTGCGTTGTGGCCGCAGCAACCTCGGTTCGAATCCGAGTCACGGCATTGTGGCAACAATGGCACGGCAAGGGGTTCCTGTGTTTTT	152	.(((((((.......)))))))(((((..(((.....((.((((((...((((........))))....((((((.((((((((...(((((.......))))).....))..)))))).)))))).)))))).)))))..)))))......	GCCGTGATCGTATAGTGGTTAGTACTCTGCGTT	Other	33	ExactMatch	168	81	80	193	678	512	785	668	686	565	780	1029	1718.69	1217.44	1104.8	2401.96	4125.27	3154.44	3174.1	3402.9	3076.69	3535.47	5092.51	5087.99	2.14998	0.00252801	0.0102226	1.21182	0.245854	0.554651	2.60539	0.00507049	0.0262757
AS-tDR-001321	-	-	pre-chr3.trna8791-HisGTG	41	74	GAATATTCAGAAGAGGAATATTACAGGTCCCTGGTAGCTCGCCGTGATCGTATAGTGGTTAGTACTCTGCGTTGTGGCCGCAGCAACCTCGGTTCGAATCCGAGTCACGGCATTGTGGCAACAATGGCACGGCAAGGGGTTCCTGTGTTTTT	152	.(((((((.......)))))))(((((..(((.....((.((((((...((((........))))....((((((.((((((((...(((((.......))))).....))..)))))).)))))).)))))).)))))..)))))......	GCCGTGATCGTATAGTGGTTAGTACTCTGCGTTG	Other	34	ExactMatch	51	33	50	51	269	185	337	260	312	260	308	311	521.744	495.994	690.503	634.715	1636.72	1139.79	1362.64	1324.48	1399.31	1626.94	2010.89	1537.77	2.32967	0.000444282	0.0036511	1.20325	0.146033	0.410438	2.80317	0.000267067	0.00355151
AS-tDR-003565	-	-	pre-chr3.trna8791-HisGTG	42	68	GAATATTCAGAAGAGGAATATTACAGGTCCCTGGTAGCTCGCCGTGATCGTATAGTGGTTAGTACTCTGCGTTGTGGCCGCAGCAACCTCGGTTCGAATCCGAGTCACGGCATTGTGGCAACAATGGCACGGCAAGGGGTTCCTGTGTTTTT	152	.(((((((.......)))))))(((((..(((.....((.((((((...((((........))))....((((((.((((((((...(((((.......))))).....))..)))))).)))))).)))))).)))))..)))))......	CCGTGATCGTATAGTGGTTAGTACTCT	Other	27	ExactMatch	154	10	29	15	0	25	67	0	0	0	0	0	1575.46	150.301	400.492	186.681	0	154.025	270.911	0	0	0	0	0	-5.40159	0.218329	0.275036	-107.234	0.157607	0.419991	-579.234	0.136973	0.194263
AS-tDR-003567	-	-	pre-chr3.trna8791-HisGTG	42	70	GAATATTCAGAAGAGGAATATTACAGGTCCCTGGTAGCTCGCCGTGATCGTATAGTGGTTAGTACTCTGCGTTGTGGCCGCAGCAACCTCGGTTCGAATCCGAGTCACGGCATTGTGGCAACAATGGCACGGCAAGGGGTTCCTGTGTTTTT	152	.(((((((.......)))))))(((((..(((.....((.((((((...((((........))))....((((((.((((((((...(((((.......))))).....))..)))))).)))))).)))))).)))))..)))))......	CCGTGATCGTATAGTGGTTAGTACTCTGC	Other	29	ExactMatch	71	51	30	43	25	37	87	0	50	36	41	59	726.35	766.537	414.302	535.152	152.112	227.957	351.78	0	224.248	225.269	267.683	291.731	-3.32452	0.00831349	0.0194141	1.37655	0.393803	0.668898	-2.41511	0.00537043	0.0262757
AS-tDR-003568	-	-	pre-chr3.trna8791-HisGTG	42	71	GAATATTCAGAAGAGGAATATTACAGGTCCCTGGTAGCTCGCCGTGATCGTATAGTGGTTAGTACTCTGCGTTGTGGCCGCAGCAACCTCGGTTCGAATCCGAGTCACGGCATTGTGGCAACAATGGCACGGCAAGGGGTTCCTGTGTTTTT	152	.(((((((.......)))))))(((((..(((.....((.((((((...((((........))))....((((((.((((((((...(((((.......))))).....))..)))))).)))))).)))))).)))))..)))))......	CCGTGATCGTATAGTGGTTAGTACTCTGCG	Other	30	ExactMatch	227	156	148	132	102	141	378	138	218	166	263	304	2322.27	2344.7	2043.89	1642.79	620.615	868.703	1528.42	702.995	977.723	1038.74	1717.09	1503.16	-2.24383	0.00454939	0.0130917	1.407	0.214808	0.5101	-1.59476	0.0184095	0.0516162
AS-tDR-003573	-	-	pre-chr3.trna8791-HisGTG	42	76	GAATATTCAGAAGAGGAATATTACAGGTCCCTGGTAGCTCGCCGTGATCGTATAGTGGTTAGTACTCTGCGTTGTGGCCGCAGCAACCTCGGTTCGAATCCGAGTCACGGCATTGTGGCAACAATGGCACGGCAAGGGGTTCCTGTGTTTTT	152	.(((((((.......)))))))(((((..(((.....((.((((((...((((........))))....((((((.((((((((...(((((.......))))).....))..)))))).)))))).)))))).)))))..)))))......	CCGTGATCGTATAGTGGTTAGTACTCTGCGTTGTG	Other	35	ExactMatch	35	41	37	93	0	62	493	0	65	26	20	0	358.06	616.236	510.972	1157.42	0	381.983	1993.42	0	291.523	162.694	130.577	0	-1.11233	0.899242	0.914496	-4.04114	0.385982	0.66394	-4.4951	0.0312493	0.0711573
AS-tDR-003593	-	-	pre-chr3.trna8791-HisGTG	43	68	GAATATTCAGAAGAGGAATATTACAGGTCCCTGGTAGCTCGCCGTGATCGTATAGTGGTTAGTACTCTGCGTTGTGGCCGCAGCAACCTCGGTTCGAATCCGAGTCACGGCATTGTGGCAACAATGGCACGGCAAGGGGTTCCTGTGTTTTT	152	.(((((((.......)))))))(((((..(((.....((.((((((...((((........))))....((((((.((((((((...(((((.......))))).....))..)))))).)))))).)))))).)))))..)))))......	CGTGATCGTATAGTGGTTAGTACTCT	Other	26	ExactMatch	634	26	84	38	32	32	53	28	0	0	0	0	6486	390.784	1160.04	472.925	194.703	197.152	214.302	142.637	0	0	0	0	-11.3095	0.233057	0.291381	-188.199	1.94243e-05	0.00322885	-2128.44	0.196146	0.253465
AS-tDR-003596	-	-	pre-chr3.trna8791-HisGTG	43	71	GAATATTCAGAAGAGGAATATTACAGGTCCCTGGTAGCTCGCCGTGATCGTATAGTGGTTAGTACTCTGCGTTGTGGCCGCAGCAACCTCGGTTCGAATCCGAGTCACGGCATTGTGGCAACAATGGCACGGCAAGGGGTTCCTGTGTTTTT	152	.(((((((.......)))))))(((((..(((.....((.((((((...((((........))))....((((((.((((((((...(((((.......))))).....))..)))))).)))))).)))))).)))))..)))))......	CGTGATCGTATAGTGGTTAGTACTCTGCG	Other	29	ExactMatch	326	31	70	51	85	74	222	80	97	66	119	142	3335.07	465.934	966.704	634.715	517.179	455.915	897.644	407.533	435.042	412.993	776.935	702.133	-2.36888	0.293711	0.362872	1.0214	0.935624	1	-2.31926	0.298754	0.367736
AS-tDR-001324	-	-	pre-chr2.trna7563-HisGTG	40	73	AATAAATTGAGGCCGCAACCCGCTGCTTGCCCGGTGGCTCGCCGTGATCGTATAGTGGTTAGTACTCTGCGTTGTGGCCGCAGCAACCTCGGTTCGAATCCGAGTCACGGCATTTGGTAGTACCGTCCCACTGCAGCTGTTTTTATTAAGTG	152	((((((....(((.(((....(((((..(((....)))..((((..(.((((.((((.....)))).)))))..)))).)))))...(((((.......)))))..((((.(((....))).)))).....))).)))...)))))).....	GGCCGTGATCGTATAGTGGTTAGTACTCTGCGTT	Other	34	1C>G	92	94	64	116	77	78	93	99	153	95	160	145	941.186	1412.83	883.844	1443.67	468.504	480.559	376.04	504.322	686.2	594.46	1044.62	716.966	-2.55561	0.00336736	0.0126692	1.6615	0.0250046	0.245845	-1.53813	0.0618136	0.109522
AS-tDR-007267	-	-	pre-chr2.trna7563-HisGTG	41	71	AATAAATTGAGGCCGCAACCCGCTGCTTGCCCGGTGGCTCGCCGTGATCGTATAGTGGTTAGTACTCTGCGTTGTGGCCGCAGCAACCTCGGTTCGAATCCGAGTCACGGCATTTGGTAGTACCGTCCCACTGCAGCTGTTTTTATTAAGTG	152	((((((....(((.(((....(((((..(((....)))..((((..(.((((.((((.....)))).)))))..)))).)))))...(((((.......)))))..((((.(((....))).)))).....))).)))...)))))).....	GCCGTGATCGTATAGTGGTTAGTACTCTGCA	Other	31	31G>A	52	24	29	32	173	123	206	143	214	149	244	261	531.975	360.723	400.492	398.253	1052.61	757.804	832.949	728.466	959.783	932.363	1593.04	1290.54	1.99112	0.00221224	0.00959686	1.41587	0.0878207	0.351095	2.81916	0.00297884	0.0195083
AS-tDR-000744	-	-	pre-chr2.trna7563-HisGTG	41	71	AATAAATTGAGGCCGCAACCCGCTGCTTGCCCGGTGGCTCGCCGTGATCGTATAGTGGTTAGTACTCTGCGTTGTGGCCGCAGCAACCTCGGTTCGAATCCGAGTCACGGCATTTGGTAGTACCGTCCCACTGCAGCTGTTTTTATTAAGTG	152	((((((....(((.(((....(((((..(((....)))..((((..(.((((.((((.....)))).)))))..)))).)))))...(((((.......)))))..((((.(((....))).)))).....))).)))...)))))).....	GCCGTGATCGTATAGTGGTTAGTACTCTGCG	Other	31	ExactMatch	138	80	83	103	617	477	658	400	869	563	841	1015	1411.78	1202.41	1146.23	1281.88	3754.11	2938.8	2660.59	2037.67	3897.44	3522.96	5490.77	5018.76	2.25812	0.00456353	0.0130917	1.57382	0.031138	0.245845	3.55388	0.000453365	0.0051014
AS-tDR-001319	-	-	pre-chr2.trna7563-HisGTG	41	72	AATAAATTGAGGCCGCAACCCGCTGCTTGCCCGGTGGCTCGCCGTGATCGTATAGTGGTTAGTACTCTGCGTTGTGGCCGCAGCAACCTCGGTTCGAATCCGAGTCACGGCATTTGGTAGTACCGTCCCACTGCAGCTGTTTTTATTAAGTG	152	((((((....(((.(((....(((((..(((....)))..((((..(.((((.((((.....)))).)))))..)))).)))))...(((((.......)))))..((((.(((....))).)))).....))).)))...)))))).....	GCCGTGATCGTATAGTGGTTAGTACTCTGCGT	Other	32	ExactMatch	36	16	22	24	171	132	194	148	142	135	217	205	368.29	240.482	303.821	298.689	1040.44	813.254	784.428	753.937	636.866	844.758	1416.76	1013.64	2.79446	0.000241837	0.00255093	1.15311	0.492091	0.771688	3.22232	0.00684595	0.0282071
AS-tDR-001320	-	-	pre-chr2.trna7563-HisGTG	41	73	AATAAATTGAGGCCGCAACCCGCTGCTTGCCCGGTGGCTCGCCGTGATCGTATAGTGGTTAGTACTCTGCGTTGTGGCCGCAGCAACCTCGGTTCGAATCCGAGTCACGGCATTTGGTAGTACCGTCCCACTGCAGCTGTTTTTATTAAGTG	152	((((((....(((.(((....(((((..(((....)))..((((..(.((((.((((.....)))).)))))..)))).)))))...(((((.......)))))..((((.(((....))).)))).....))).)))...)))))).....	GCCGTGATCGTATAGTGGTTAGTACTCTGCGTT	Other	33	ExactMatch	168	81	80	193	678	512	785	668	686	565	780	1029	1718.69	1217.44	1104.8	2401.96	4125.27	3154.44	3174.1	3402.9	3076.69	3535.47	5092.51	5087.99	2.14998	0.00252801	0.0102226	1.21182	0.245854	0.554651	2.60539	0.00507049	0.0262757
AS-tDR-001321	-	-	pre-chr2.trna7563-HisGTG	41	74	AATAAATTGAGGCCGCAACCCGCTGCTTGCCCGGTGGCTCGCCGTGATCGTATAGTGGTTAGTACTCTGCGTTGTGGCCGCAGCAACCTCGGTTCGAATCCGAGTCACGGCATTTGGTAGTACCGTCCCACTGCAGCTGTTTTTATTAAGTG	152	((((((....(((.(((....(((((..(((....)))..((((..(.((((.((((.....)))).)))))..)))).)))))...(((((.......)))))..((((.(((....))).)))).....))).)))...)))))).....	GCCGTGATCGTATAGTGGTTAGTACTCTGCGTTG	Other	34	ExactMatch	51	33	50	51	269	185	337	260	312	260	308	311	521.744	495.994	690.503	634.715	1636.72	1139.79	1362.64	1324.48	1399.31	1626.94	2010.89	1537.77	2.32967	0.000444282	0.0036511	1.20325	0.146033	0.410438	2.80317	0.000267067	0.00355151
AS-tDR-003565	-	-	pre-chr2.trna7563-HisGTG	42	68	AATAAATTGAGGCCGCAACCCGCTGCTTGCCCGGTGGCTCGCCGTGATCGTATAGTGGTTAGTACTCTGCGTTGTGGCCGCAGCAACCTCGGTTCGAATCCGAGTCACGGCATTTGGTAGTACCGTCCCACTGCAGCTGTTTTTATTAAGTG	152	((((((....(((.(((....(((((..(((....)))..((((..(.((((.((((.....)))).)))))..)))).)))))...(((((.......)))))..((((.(((....))).)))).....))).)))...)))))).....	CCGTGATCGTATAGTGGTTAGTACTCT	Other	27	ExactMatch	154	10	29	15	0	25	67	0	0	0	0	0	1575.46	150.301	400.492	186.681	0	154.025	270.911	0	0	0	0	0	-5.40159	0.218329	0.275036	-107.234	0.157607	0.419991	-579.234	0.136973	0.194263
AS-tDR-003567	-	-	pre-chr2.trna7563-HisGTG	42	70	AATAAATTGAGGCCGCAACCCGCTGCTTGCCCGGTGGCTCGCCGTGATCGTATAGTGGTTAGTACTCTGCGTTGTGGCCGCAGCAACCTCGGTTCGAATCCGAGTCACGGCATTTGGTAGTACCGTCCCACTGCAGCTGTTTTTATTAAGTG	152	((((((....(((.(((....(((((..(((....)))..((((..(.((((.((((.....)))).)))))..)))).)))))...(((((.......)))))..((((.(((....))).)))).....))).)))...)))))).....	CCGTGATCGTATAGTGGTTAGTACTCTGC	Other	29	ExactMatch	71	51	30	43	25	37	87	0	50	36	41	59	726.35	766.537	414.302	535.152	152.112	227.957	351.78	0	224.248	225.269	267.683	291.731	-3.32452	0.00831349	0.0194141	1.37655	0.393803	0.668898	-2.41511	0.00537043	0.0262757
AS-tDR-003568	-	-	pre-chr2.trna7563-HisGTG	42	71	AATAAATTGAGGCCGCAACCCGCTGCTTGCCCGGTGGCTCGCCGTGATCGTATAGTGGTTAGTACTCTGCGTTGTGGCCGCAGCAACCTCGGTTCGAATCCGAGTCACGGCATTTGGTAGTACCGTCCCACTGCAGCTGTTTTTATTAAGTG	152	((((((....(((.(((....(((((..(((....)))..((((..(.((((.((((.....)))).)))))..)))).)))))...(((((.......)))))..((((.(((....))).)))).....))).)))...)))))).....	CCGTGATCGTATAGTGGTTAGTACTCTGCG	Other	30	ExactMatch	227	156	148	132	102	141	378	138	218	166	263	304	2322.27	2344.7	2043.89	1642.79	620.615	868.703	1528.42	702.995	977.723	1038.74	1717.09	1503.16	-2.24383	0.00454939	0.0130917	1.407	0.214808	0.5101	-1.59476	0.0184095	0.0516162
AS-tDR-003573	-	-	pre-chr2.trna7563-HisGTG	42	76	AATAAATTGAGGCCGCAACCCGCTGCTTGCCCGGTGGCTCGCCGTGATCGTATAGTGGTTAGTACTCTGCGTTGTGGCCGCAGCAACCTCGGTTCGAATCCGAGTCACGGCATTTGGTAGTACCGTCCCACTGCAGCTGTTTTTATTAAGTG	152	((((((....(((.(((....(((((..(((....)))..((((..(.((((.((((.....)))).)))))..)))).)))))...(((((.......)))))..((((.(((....))).)))).....))).)))...)))))).....	CCGTGATCGTATAGTGGTTAGTACTCTGCGTTGTG	Other	35	ExactMatch	35	41	37	93	0	62	493	0	65	26	20	0	358.06	616.236	510.972	1157.42	0	381.983	1993.42	0	291.523	162.694	130.577	0	-1.11233	0.899242	0.914496	-4.04114	0.385982	0.66394	-4.4951	0.0312493	0.0711573
AS-tDR-003593	-	-	pre-chr2.trna7563-HisGTG	43	68	AATAAATTGAGGCCGCAACCCGCTGCTTGCCCGGTGGCTCGCCGTGATCGTATAGTGGTTAGTACTCTGCGTTGTGGCCGCAGCAACCTCGGTTCGAATCCGAGTCACGGCATTTGGTAGTACCGTCCCACTGCAGCTGTTTTTATTAAGTG	152	((((((....(((.(((....(((((..(((....)))..((((..(.((((.((((.....)))).)))))..)))).)))))...(((((.......)))))..((((.(((....))).)))).....))).)))...)))))).....	CGTGATCGTATAGTGGTTAGTACTCT	Other	26	ExactMatch	634	26	84	38	32	32	53	28	0	0	0	0	6486	390.784	1160.04	472.925	194.703	197.152	214.302	142.637	0	0	0	0	-11.3095	0.233057	0.291381	-188.199	1.94243e-05	0.00322885	-2128.44	0.196146	0.253465
AS-tDR-003596	-	-	pre-chr2.trna7563-HisGTG	43	71	AATAAATTGAGGCCGCAACCCGCTGCTTGCCCGGTGGCTCGCCGTGATCGTATAGTGGTTAGTACTCTGCGTTGTGGCCGCAGCAACCTCGGTTCGAATCCGAGTCACGGCATTTGGTAGTACCGTCCCACTGCAGCTGTTTTTATTAAGTG	152	((((((....(((.(((....(((((..(((....)))..((((..(.((((.((((.....)))).)))))..)))).)))))...(((((.......)))))..((((.(((....))).)))).....))).)))...)))))).....	CGTGATCGTATAGTGGTTAGTACTCTGCG	Other	29	ExactMatch	326	31	70	51	85	74	222	80	97	66	119	142	3335.07	465.934	966.704	634.715	517.179	455.915	897.644	407.533	435.042	412.993	776.935	702.133	-2.36888	0.293711	0.362872	1.0214	0.935624	1	-2.31926	0.298754	0.367736
AS-tDR-001324	-	-	pre-chr2.trna7567-HisGTG	40	73	AATAAATTGAGGCCGCAACCCGCTGCTTGCCCGGTGGCTCGCCGTGATCGTATAGTGGTTAGTACTCTGCGTTGTGGCCGCAGCAACCTCGGTTCGAATCCGAGTCACGGCATTTGGTAGTACCGTCCCACTGCAGCTGTTTTTATTAAGTG	152	((((((....(((.(((....(((((..(((....)))..((((..(.((((.((((.....)))).)))))..)))).)))))...(((((.......)))))..((((.(((....))).)))).....))).)))...)))))).....	GGCCGTGATCGTATAGTGGTTAGTACTCTGCGTT	Other	34	1C>G	92	94	64	116	77	78	93	99	153	95	160	145	941.186	1412.83	883.844	1443.67	468.504	480.559	376.04	504.322	686.2	594.46	1044.62	716.966	-2.55561	0.00336736	0.0126692	1.6615	0.0250046	0.245845	-1.53813	0.0618136	0.109522
AS-tDR-007267	-	-	pre-chr2.trna7567-HisGTG	41	71	AATAAATTGAGGCCGCAACCCGCTGCTTGCCCGGTGGCTCGCCGTGATCGTATAGTGGTTAGTACTCTGCGTTGTGGCCGCAGCAACCTCGGTTCGAATCCGAGTCACGGCATTTGGTAGTACCGTCCCACTGCAGCTGTTTTTATTAAGTG	152	((((((....(((.(((....(((((..(((....)))..((((..(.((((.((((.....)))).)))))..)))).)))))...(((((.......)))))..((((.(((....))).)))).....))).)))...)))))).....	GCCGTGATCGTATAGTGGTTAGTACTCTGCA	Other	31	31G>A	52	24	29	32	173	123	206	143	214	149	244	261	531.975	360.723	400.492	398.253	1052.61	757.804	832.949	728.466	959.783	932.363	1593.04	1290.54	1.99112	0.00221224	0.00959686	1.41587	0.0878207	0.351095	2.81916	0.00297884	0.0195083
AS-tDR-000744	-	-	pre-chr2.trna7567-HisGTG	41	71	AATAAATTGAGGCCGCAACCCGCTGCTTGCCCGGTGGCTCGCCGTGATCGTATAGTGGTTAGTACTCTGCGTTGTGGCCGCAGCAACCTCGGTTCGAATCCGAGTCACGGCATTTGGTAGTACCGTCCCACTGCAGCTGTTTTTATTAAGTG	152	((((((....(((.(((....(((((..(((....)))..((((..(.((((.((((.....)))).)))))..)))).)))))...(((((.......)))))..((((.(((....))).)))).....))).)))...)))))).....	GCCGTGATCGTATAGTGGTTAGTACTCTGCG	Other	31	ExactMatch	138	80	83	103	617	477	658	400	869	563	841	1015	1411.78	1202.41	1146.23	1281.88	3754.11	2938.8	2660.59	2037.67	3897.44	3522.96	5490.77	5018.76	2.25812	0.00456353	0.0130917	1.57382	0.031138	0.245845	3.55388	0.000453365	0.0051014
AS-tDR-001319	-	-	pre-chr2.trna7567-HisGTG	41	72	AATAAATTGAGGCCGCAACCCGCTGCTTGCCCGGTGGCTCGCCGTGATCGTATAGTGGTTAGTACTCTGCGTTGTGGCCGCAGCAACCTCGGTTCGAATCCGAGTCACGGCATTTGGTAGTACCGTCCCACTGCAGCTGTTTTTATTAAGTG	152	((((((....(((.(((....(((((..(((....)))..((((..(.((((.((((.....)))).)))))..)))).)))))...(((((.......)))))..((((.(((....))).)))).....))).)))...)))))).....	GCCGTGATCGTATAGTGGTTAGTACTCTGCGT	Other	32	ExactMatch	36	16	22	24	171	132	194	148	142	135	217	205	368.29	240.482	303.821	298.689	1040.44	813.254	784.428	753.937	636.866	844.758	1416.76	1013.64	2.79446	0.000241837	0.00255093	1.15311	0.492091	0.771688	3.22232	0.00684595	0.0282071
AS-tDR-001320	-	-	pre-chr2.trna7567-HisGTG	41	73	AATAAATTGAGGCCGCAACCCGCTGCTTGCCCGGTGGCTCGCCGTGATCGTATAGTGGTTAGTACTCTGCGTTGTGGCCGCAGCAACCTCGGTTCGAATCCGAGTCACGGCATTTGGTAGTACCGTCCCACTGCAGCTGTTTTTATTAAGTG	152	((((((....(((.(((....(((((..(((....)))..((((..(.((((.((((.....)))).)))))..)))).)))))...(((((.......)))))..((((.(((....))).)))).....))).)))...)))))).....	GCCGTGATCGTATAGTGGTTAGTACTCTGCGTT	Other	33	ExactMatch	168	81	80	193	678	512	785	668	686	565	780	1029	1718.69	1217.44	1104.8	2401.96	4125.27	3154.44	3174.1	3402.9	3076.69	3535.47	5092.51	5087.99	2.14998	0.00252801	0.0102226	1.21182	0.245854	0.554651	2.60539	0.00507049	0.0262757
[truncated: 2,954 more rows]
